# Supplementary material
Source: HighWire-hosted journal article supplement (https://www.jneurosci.org/content/40/25/4888)
Supplement: inline-supplementary-material-9 [file inline-supplementary-material-9.xls]

## Sheet: Fig 4-3
Tissue	Differential Regulation	Biological Concept	GO Term/Pathway	Gene list	Count	Benjamini adj p value	–log10(adj p value)
DG	Upregulated	GOTERM_BP_FAT	GO:0006383~transcription from RNA polymerase III promoter	POLR3G, POLR3F, SNAPC5, SNAPC1, POLR2K, BDP1, CRCP, TBP, POLR3C, ZC3H8, ICE2, ICE1, GTF3C6, GTF3C3	14	0.0486097	1.31328
DG	Upregulated	GOTERM_BP_FAT	GO:0009855~determination of bilateral symmetry	DNAH11, DYNC2LI1, GREM1, CCDC39, ACVR1C, OFD1, NPHP3, PKD2, DYNC2H1, CEP290, LRRC6, KIF3A, DRC1, RPGRIP1L, AHI1, SMAD3, NME7, RTTN, TMEM67, MIB1, HIF1A, IFT57, CC2D2A, LRP6, TGIF1, RFX3, MAPK8, IFT88, ARL13B, IFT74	30	0.0444377	1.35225
DG	Upregulated	GOTERM_BP_FAT	GO:0006984~ER-nucleus signaling pathway	ATF4, ATG10, MBTPS2, PTPN2, TMEM33, GSK3B, NCK1, CCDC47, ERLIN2, ERLIN1, EIF2A, EIF2AK3	12	0.0433691	1.36282
DG	Upregulated	GOTERM_BP_FAT	GO:0031440~regulation of mRNA 3'-end processing	NCBP2, ZC3H14, NCBP1, PAPOLA, CCNT1, LEO1, CDC73, AHCYL1, RNF20	9	0.0430494	1.36603
DG	Upregulated	GOTERM_BP_FAT	GO:0031440~regulation of mRNA 3'-end processing	NCBP2, ZC3H14, NCBP1, PAPOLA, CCNT1, LEO1, CDC73, AHCYL1, RNF20	9	0.0430494	1.36603
DG	Upregulated	GOTERM_BP_FAT	GO:0032647~regulation of interferon-alpha production	HAVCR2, DDX58, HMGB1, ZC3HAV1, TBK1, TLR3, TLR4, HSPD1, TLR7	9	0.0430494	1.36603
DG	Upregulated	GOTERM_BP_FAT	GO:0006897~endocytosis	SYT1, MSR1, AIF1, SLC9A3, SYNJ1, FCRL2, ITSN2, CLTC, MEGF10, CANX, CD2AP, RAB1A, B2M, CD47, DAB2, PICALM, PIK3CA, CALCRL, GHR, SYK, MYO6, RAB39A, C4B, PIK3CB, PIK3C2A, FMR1, COLEC12, SYNJ2BP, LMBRD1, NCL, BICD1, LRPAP1, MIB1, MAPK1, NPC1, EIF2AK1, SCYL2, CARMIL1, RAB14, OPHN1, CSNK1G3, LRRK2, ANKFY1, CAMK1D, HMGB1, CLCN3, SNX6, C3, UBE3A, SNX5, GULP1, SNX7, SNX2, HFE, SNX4, EEA1, CBLL1, ABCA1, GR…	93	0.0424949	1.37166
DG	Upregulated	GOTERM_BP_FAT	GO:1904752~regulation of vascular associated smooth muscle cell migration	MYO5A, MDM2, DOCK7, PAK1, DOCK5, TPM1, IQGAP1, DOCK4	8	0.041856	1.37824
DG	Upregulated	GOTERM_BP_FAT	GO:2000104~negative regulation of DNA-dependent DNA replication	PID1, FBXW7, FBXO18, TIPINL1, BRCA2, SMC1A, SMC3, STAG2	8	0.041856	1.37824
DG	Upregulated	GOTERM_BP_FAT	GO:2000104~negative regulation of DNA-dependent DNA replication	PID1, FBXW7, FBXO18, TIPINL1, BRCA2, SMC1A, SMC3, STAG2	8	0.041856	1.37824
DG	Upregulated	GOTERM_BP_FAT	GO:2000301~negative regulation of synaptic vesicle exocytosis	SYT4, BRAF, FMR1, RAP1A, RAP1B	5	0.0363192	1.43986
DG	Upregulated	GOTERM_BP_FAT	GO:0016358~dendrite development	PREX2, STRN, IQGAP1, ACTR2, PICALM, DAB1, BHLHB9, PAK3, ROBO2, PAK1, SGK1, MYO6, OPA1, ROCK2, FMR1, MECP2, CDKL3, CDKL5, CTNNA2, FMN1, EIF4G2, TMEM106B, MAPK6, AKAP5, CLIP1, MAPK8, LRRK2, SEPT7, KALRN, BBS4, MAPKAPK5, ASAP1, UBA6, ABI1, PAFAH1B1, ACSL4, PTPRD, TRPC6, PTPRZ1, MCF2, MAP1B, NLGN1, CAPRIN1, CAPRIN2, PPP1R9A, NEDD4, GSK3B, MAP2, LRP8, VLDLR	50	0.0357051	1.44727
DG	Upregulated	GOTERM_BP_FAT	GO:0051236~establishment of RNA localization	NCBP2, ENY2, NCBP1, PNPT1, CPEB1, POLR2D, NXT2, HNRNPA3, TPR, XPOT, CKAP5, SNUPN, HNRNPA2B1, FMR1, KIF5C, ATR, NXF1, HNRNPA1, IWS1, ATM, SENP2, SARNP, TSC1, FYTTD1, TOMM20, THOC2, SETD2, THOC1	28	0.0339982	1.46854
DG	Upregulated	GOTERM_BP_FAT	GO:0030865~cortical cytoskeleton organization	EPB41L2, EPB41L3, FMNL2, ROCK1, EPB41, PLEK, ROCK2, PLS1, NLGN1, PAFAH1B1, WIPF1, SEPT7, PPP2R3C, DLG1	14	0.0326775	1.48575
DG	Upregulated	GOTERM_BP_FAT	GO:0034976~response to endoplasmic reticulum stress	CREBRF, ATG10, COPS5, TMX4, TMX3, DNAJC10, EDEM3, PMAIP1, EDEM1, ERLEC1, CASP4, RNF103, TMEM33, COL4A3BP, TARDBP, DNAJC3, USP14, PIK3R1, OPA1, MBTPS2, UBE4A, PTPN2, ERLIN2, CCDC47, ERLIN1, UBE2J2, ATF6, UFL1, TMEM67, BFAR, ATF4, HSP90B1, PSMC6, ATXN3, DNAJB9, GSK3B, EIF2S1, NCK1, IKBKG, RNF139, SVIP, LRRK2, EIF2AK2, USP25, EIF2AK3, SERP1	46	0.0281057	1.55121
DG	Upregulated	GOTERM_BP_FAT	GO:1902275~regulation of chromatin organization	EID1, KDM6A, APOBEC1, KMT2A, CTCF, CHEK1, PAXBP1, ZFP110, ZFP451, NIPBL, SIN3A, SLK, MIER1, BRD7, EED, ANP32A, PIWIL2, KDM3A, OGT, KDM5A, TPR, TRIP12, FMR1, TAF7, MECP2, ATAD2, SNW1, UBE2B, ATM, IWS1, RPS6KA5, ATRX, UBE2N, MTF2, UBR5, KDM4C, MAPK8, RNF20	38	0.028004	1.55278
DG	Upregulated	GOTERM_BP_FAT	GO:1902275~regulation of chromatin organization	EID1, KDM6A, APOBEC1, KMT2A, CTCF, CHEK1, PAXBP1, ZFP110, ZFP451, NIPBL, SIN3A, SLK, MIER1, BRD7, EED, ANP32A, PIWIL2, KDM3A, OGT, KDM5A, TPR, TRIP12, FMR1, TAF7, MECP2, ATAD2, SNW1, UBE2B, ATM, IWS1, RPS6KA5, ATRX, UBE2N, MTF2, UBR5, KDM4C, MAPK8, RNF20	38	0.028004	1.55278
DG	Upregulated	GOTERM_BP_FAT	GO:0007041~lysosomal transport	CHMP5, SNX27, VPS54, SNX16, GPRASP1, SNAPIN, VPS41, GCC2, KIF13A, HOOK1, TMEM106B, LAMP2, SCYL2, NEDD4, RBSN, ZFYVE16, VPS4B, VPS35, ANKFY1, AP3B1	20	0.0279499	1.55362
DG	Upregulated	GOTERM_BP_FAT	GO:0042981~regulation of apoptotic process	PTGS2, AIF1, NAA15, NAA16, REST, SGMS1, ANKLE2, MAP3K7, G2E3, SIN3A, BHLHB9, CTGF, KIFAP3, PIK3CA, NSMAF, OXR1, OPA1, BRAF, ROCK1, LIFR, GRIN2A, MECP2, WNK3, LIG4, OPTN, PPARGC1A, CCR5, EIF2S1, F3, MAPK9, MAPK8, EIF2AK2, EIF2AK3, TAF9B, STK17B, RFFL, CD74, NAA35, SEMA5A, KRAS, FCER1G, FAIM, LAMTOR5, COL18A1, BMP3, TGFBR1, MAP2K4, SMAD3, ALMS1, HGF, ATM, TAX1BP1, BFAR, EPHA7, PLA2G4A, SRSF6, TGFBR…	227	0.0265528	1.57589
DG	Upregulated	GOTERM_BP_FAT	GO:0006513~protein monoubiquitination	CDC73, SKP1, TOPORS, BIRC2, UBE2B, TRIM21, TRIM37, CUL3, UBE2D3, NEDD4, KLHL12, LEO1, RNF168, WAC, NEDD4L, CUL4B, RNF20, CUL1	18	0.0250768	1.60073
DG	Upregulated	GOTERM_BP_FAT	GO:0000301~retrograde transport, vesicle recycling within Golgi	COG3, DNAJC28, GOLGA1, OPTN, RAB6A, GOLGA5, GOLGA4, TRIP11, GCC2	9	0.0213127	1.67136
DG	Upregulated	GOTERM_BP_FAT	GO:0009314~response to radiation	RAD51D, APOBEC1, PTGS2, IL18, IMPACT, XRCC6, INO80, AQP4, PMAIP1, TOP1, SWI5, CASP3, PLCB4, SGK1, REV1, RPGR, BRAF, TRPM7, USP1, FMR1, GRIN2A, MECP2, MBD4, TOPBP1, LIG4, GTF2H5, PPP1CC, UBE2B, PPP1CB, TANK, DCLRE1C, USP28, EYA1, NABP1, HIF1A, CCR5, PAPD4, ABCB1B, EIF2S1, RRM1, MDM2, MAPK9, MAPK8, CLOCK, BLM, KMT2A, NEK1, HMGCS1, PRKDC, CHEK1, CACNB4, NETO1, SEMA5A, DDHD2, FBXW7, ERCC5, CCDC66, BE…	89	0.0190951	1.71908
DG	Upregulated	GOTERM_BP_FAT	GO:1901990~regulation of mitotic cell cycle phase transition	NBN, BLM, AIF1, PPP2R5C, ANAPC15, SLF1, INO80, PRKDC, RDX, CDC73, RPS27L, CHEK1, CUL3, JADE1, SIN3A, DDX3X, BRD7, PKD2, VPS4B, RAB11A, NSMCE2, TPR, ERCC3, PLCB1, APC, PID1, ANAPC4, TAOK3, SMC5, CDC23, ATAD5, TOPBP1, MBD4, RB1, PKIA, ATM, NAE1, SENP2, ZFP655, PSME1, USP47, SYF2, TMOD3, MDM2, SLFN13, CUL4B	46	0.0183798	1.73566
DG	Upregulated	GOTERM_BP_FAT	GO:0060322~head development	CAST, SYT1, SEPT4, SYT4, TSPAN2, CADM2, PLXNA2, ATP6AP2, XRCC6, FGF13, ATP2B1, CCDC141, CTTNBP2, CUL5, DAB1, DYNC2H1, ROBO2, AFDN, RAPGEF4, PTBP2, ASPH, OGT, UNC5C, S100A1, BRAF, MECP2, GRIN2A, PCM1, PPARGC1A, NME7, CTNNA2, MAPK1, HIF1A, CCR5, SPAG6, SMARCE1, ABCB1B, AKAP5, SMARCA1, LRRK2, XRN2, FGFR2, BBS4, ZFAND5, BBS7, BMPR2, HMGCS1, UBA6, ACAT1, NR2C2, SEMA5A, NIPBL, KRAS, TTBK2, HNMT, HNRNPD…	150	0.016941	1.77106
DG	Upregulated	GOTERM_BP_FAT	GO:0035058~nonmotile primary cilium assembly	BBS4, KIF3A, BBS7, IFT80, CEP135, CCDC13, CEP126, PCM1, CENPJ, TMEM67, TTBK2, CC2D2A, MKKS, SEPT7, ARL13B	15	0.0143437	1.84334
DG	Upregulated	GOTERM_BP_FAT	GO:0023051~regulation of signaling	PTGS2, PTGS1, REST, ITSN2, SGMS1, CUL3, MAP3K7, CTGF, OGT, SYK, MAGI3, OPA1, KIF5B, BRAF, MECP2, GRIN2A, MED13, CTDSPL2, SPAG9, MAPK1, SCYL2, F3, MAPK9, RYR2, TGIF1, MAPK8, EIF2AK2, EIF2AK3, RALGPS1, PPP2R3A, HFE, ARFGEF2, ARFGEF1, SDHAF2, SORCS3, NPHP3, DUSP19, UBASH3B, FAIM, PAIP2, TAOK1, TGFBR1, MAP2K4, TAOK3, MPC2, ATR, HGF, ATM, BFAR, CYP7B1, RGS1, RGS2, CD300A, RGS5, CDC42BPA, RGS6, RGS7, T…	422	0.0126204	1.89893
DG	Upregulated	GOTERM_BP_FAT	GO:0048646~anatomical structure formation involved in morphogenesis	PTGS2, DYNC2LI1, CD53, RNF213, MAP3K7, CUL3, WDR72, CTGF, DYNC2H1, RAB23, PIK3CA, ERAP1, TBPL1, SYK, CEP295, LRRC6, OPA1, ROCK1, PIK3CB, ROCK2, SYNJ2BP, PCM1, MAPK1, CEP162, CCR5, SPAG6, F3, CC2D2A, ST14, TGIF1, EIF2AK3, IQCB1, PPP2R3A, NEK1, OCRL, SEMA5A, AGGF1, MACF1, LEO1, VEZF1, SEC23IP, COL18A1, KIF3A, TGFBR1, SMAD3, ALMS1, HGF, UBP1, ATM, NCKAP1, TULP3, TGFBR3, TMOD3, TMOD1, RTN4, TTC26, ZE…	195	0.0116588	1.93335
DG	Upregulated	GOTERM_BP_FAT	GO:0010948~negative regulation of cell cycle process	CAST, FGFR2, NBN, BLM, PPP2R5C, ANAPC15, SLF1, PRKDC, CDC73, RPS27L, CHEK1, WAPL, JADE1, FBXW7, BRD7, PKD2, VPS4A, FBXO5, CDK5RAP2, TPR, STAG2, APC, MSH2, TAOK3, TOPBP1, MBD4, CDC5L, RB1, SMC3, ATM, NAE1, TRIM37, TMEM67, ATRX, ZFP655, USP47, SYF2, MDM2, SLFN13, MDM4, SMC1A, MDM1, THOC1	43	0.0110712	1.95581
DG	Upregulated	GOTERM_BP_FAT	GO:0043558~regulation of translational initiation in response to stress	ATF4, EIF2AK1, IMPACT, EIF2S1, DNAJC3, EIF2AK2, EIF2AK3	7	0.0104095	1.98257
DG	Upregulated	GOTERM_BP_FAT	GO:0043558~regulation of translational initiation in response to stress	ATF4, EIF2AK1, IMPACT, EIF2S1, DNAJC3, EIF2AK2, EIF2AK3	7	0.0104095	1.98257
DG	Upregulated	GOTERM_BP_FAT	GO:0031023~microtubule organizing center organization	HAUS3, BBS4, CEP120, CHMP5, CHEK1, CHMP2B, OFD1, TUBGCP5, VPS4B, PPP1R12A, PAFAH1B1, SSX2IP, CDK5RAP2, CNTLN, USP33, CCP110, KIF3A, ROCK2, CKAP5, CEP135, BRCA2, CEP63, PCM1, CENPJ, GCC2, TRIM37, TMEM67, SASS6, BNIP2, WDR43, MDM1	31	0.0103911	1.98334
DG	Upregulated	GOTERM_BP_FAT	GO:0043414~macromolecule methylation	BMI1, ARMT1, RNMT, ARID4A, ARID4B, CTCF, PRMT9, TRMT10C, WTAP, KDM1B, TRMT6, PRMT6, EED, PIWIL2, TFB2M, PIK3CA, OGT, RAB6A, TGS1, MECP2, SUZ12, TRMT11, BTG1, MTF2, TRMT13, ASH1L, PCMTD1, TFB1M, RNF20, FBXO11, KMT2A, PAXBP1, ZFP110, DIMT1, TRDMT1, TDRKH, KDM3A, NSUN2, ALKBH8, SETDB2, SNW1, THUMPD3, TET2, ETF1, IWS1, SUV39H2, ATRX, RLF, METTL14, GSPT1, GSK3B, MTR, KDM4C, IRF4, SETD2, METTL15	56	0.00794253	2.10004
DG	Upregulated	GOTERM_BP_FAT	GO:0072665~protein localization to vacuole	LAMTOR5, SNX16, RDX, VPS41, GCC2, LAMP2, VPS13C, TRAPPC8, VPS13D, SH3GLB1, NEDD4, ZFYVE16, ACAP2, VPS13A, MSN, TMEM30A, AP3B1	17	0.00674392	2.17109
DG	Upregulated	GOTERM_BP_FAT	GO:0032984~macromolecular complex disassembly	CAPZA2, SYNJ1, BNIP3, RDX, FGF13, NAPB, MTIF2, TPM1, SETX, SEMA5A, IRAK3, VPS4B, VPS4A, ASPH, MRPL58, APC, SGK1, PLEK, KIF5B, MAP1B, MTRF1L, DENR, ETF1, EML4, OGFOD1, GSPT1, SMARCE1, PLEKHH2, SMARCC1, CARMIL1, CFL2, AKAP5, MGEA5, TMOD3, EIF5A2, MCTS1, SPAST, TMOD1	38	0.00631396	2.1997
DG	Upregulated	GOTERM_BP_FAT	GO:0051301~cell division	BMI1, SEPT2, CHMP5, DICER1, FGF13, ANKLE2, CD2AP, KIF13A, FUBP1, CUL3, TOP1, ACTR2, KLHL9, PIK3C3, VPS4B, VPS4A, NSMCE2, RALA, PDGFD, USP16, TPR, CCNA1, CCAR1, KIF2A, PIK3CB, PKN2, CDC5L, CDK7, RB1, PPP1CC, PPP1CB, WEE1, RBBP8, TIAL1, MCMBP, ARL8B, THOC2, RAB10, SEPT7, SPAST, FGFR2, BBS4, USP8, BLM, ANAPC15, AHCTF1, ANLN, CNTRL, SYCP2, CHMP2B, SH3GLB1, RAB11A, PAFAH1B1, RASA1, APC, PRPF40A, TXNIP…	78	0.00565704	2.24741
DG	Upregulated	GOTERM_BP_FAT	GO:1901699~cellular response to nitrogen compound	RNASEL, APOBEC1, PTGS2, GABRB3, ZC3HAV1, AIF1, IMPACT, RBM3, IL18, TLR3, PDE3B, RPS6KB1, SIN3A, PDGFD, OGT, MTUS1, PID1, HNRNPA2B1, FMR1, GRIN2A, COLEC12, UBR1, PPARGC1A, AHR, HIF1A, ABCB1B, AKAP5, RYR2, MAPK9, AKAP6, MAPK8, LRRK2, RAB10, XRN1, GCLC, BLM, SLC38A9, CHEK1, RRAGD, GCLM, RRAGC, ARG1, KRAS, HNRNPD, LAMTOR5, CFLAR, GABRA1, OSBPL8, PTPN2, P2RX7, KCNJ6, TSC1, SMARCC1, MTR, RAP1A, AHCYL1,…	118	0.0050139	2.29982
DG	Upregulated	GOTERM_BP_FAT	GO:0043254~regulation of protein complex assembly	IMPACT, CAPZA2, AP1AR, IQGAP2, TLR4, FER, PMAIP1, TLR6, LATS1, MTFR2, SENP6, SETX, MAP3K7, ACTR2, PAK3, MKKS, MSN, DLG1, SGK1, VPS41, MPP7, AHR, SLIT2, FMN1, STXBP6, NCK1, CARMIL1, FCHSD2, CLIP1, MAPK9, TMSB4X, MAPK8, EIF2AK2, LCP1, BBS4, HMGB1, SLF2, SLF1, PPM1A, ASAP1, RDX, NAPB, ARFGEF1, TPM1, SUMO1, ZFP451, MEFV, DDX3X, SH3GLB1, WIPF1, RASA1, APC, DNM1L, PLEK, NIN, MAP1B, RICTOR, ARFIP1, BIRC…	74	0.00366604	2.4358
DG	Upregulated	GOTERM_BP_DIRECT	GO:0006468~protein phosphorylation	RNASEL, CDK17, PRPF4B, FASTKD2, PHKB, CCNT1, EIF2A, RPS6KB1, FER, LATS1, ACVR1C, MAP3K7, SLK, PAK3, PIK3C3, CDK12, PIK3CA, STK39, CAB39, PAK1, CHUK, AKT3, SYK, SRPK2, SGK1, ADAM10, PAN3, ROCK1, LYN, BRAF, SGK3, TRPM7, ROCK2, STK26, PKN2, PRKCI, WNK1, WNK3, SCYL3, CDK7, CDKL3, CDKL2, STK4, WEE1, TBCK, CDKL5, GTF2H1, MAPK1, MAP4K5, EIF2AK1, MAPK6, HIPK1, RIOK3, SCYL2, MAPK9, MAPK8, CSNK1G3, EIF2AK2…	101	0.00289838	2.53784
DG	Upregulated	GOTERM_BP_FAT	GO:0010564~regulation of cell cycle process	CAST, NBN, CHMP5, AIF1, PPP2R5C, TIPINL1, INO80, RPS27L, SENP6, CUL3, JADE1, SIN3A, CTGF, PIK3C3, BRD7, VPS4B, PIWIL2, VPS4A, NSMCE2, CDK5RAP2, PLCB1, TPR, STAG2, PID1, ROCK2, ANAPC4, PKN2, MBD4, TOPBP1, CDC5L, RB1, PKIA, UBE2B, TRIM37, TMEM67, SENP2, ZFP655, PSME1, MDM2, MAPK8, MDM4, MDM1, SPAST, THOC1, MED1, FGFR2, CEP97, BBS4, CEP120, BLM, CRLF3, NEK1, SLF2, SLF1, ANAPC15, PRKDC, TXLNG, RDX, C…	96	0.00264675	2.57729
DG	Upregulated	GOTERM_BP_FAT	GO:2001022~positive regulation of response to DNA damage stimulus	HMGB1, BLM, CEBPG, SLF2, SLF1, FMR1, UBE2V2, PMAIP1, ATR, DDX5, UIMC1, MTFR2, ATM, UBE2N, EYA4, EYA1, RIF1, NSMCE1, FBXO18, PCNA, PARG, RNF168, SKIL, SPRED1	24	0.00223289	2.65113
DG	Upregulated	GOTERM_BP_FAT	GO:0070201~regulation of establishment of protein localization	HMGN3, SYT4, PTGS2, IL18, XPO4, TNFSF15, TLR3, PDE3B, TLR4, PMAIP1, REST, TLR6, TLR7, ERLEC1, WDR75, DAB2, PICALM, STARD7, TARDBP, PIK3C3, PLS1, RAB23, CEP290, RAPGEF4, ASPH, OGT, SYK, PID1, KIF5B, UGCG, LYPLA1, WNK3, UBE2J2, PCM1, CDKL2, PKIA, GCC2, CTDSPL2, HIF1A, CCR5, UBR5, VSNL1, AKAP5, VAMP4, AKAP6, LRRK2, PAM, HMGB1, PFKFB2, MYT1, GREM1, UHMK1, SEMA5A, OAZ2, FBXW7, UBE2D3, HNMT, GOLPH3L, D…	148	0.00199081	2.70097
DG	Upregulated	GOTERM_BP_FAT	GO:0031124~mRNA 3'-end processing	ZC3H14, NCBP2, NCBP1, CSTF2, PNPT1, CCNT1, CDC73, CSTF2T, POLR2D, PCF11, PAPOLA, NUDT21, CPSF6, LEO1, AHCYL1, PAPOLG, RNF20	17	0.00174214	2.75892
DG	Upregulated	GOTERM_BP_FAT	GO:0042176~regulation of protein catabolic process	CREBRF, CAST, ERLEC1, TMF1, BAG5, DAB2, UBXN2A, MSN, ITCH, USP14, FMR1, GRIN2A, SOCS4, UFL1, TMEM67, PDCL3, SENP1, PSME1, RNF139, UCHL5, MDM2, OPHN1, MDM4, LRRK2, USP25, TRIM39, VIP, GCLC, PPP2R3A, BBS7, UBE3A, TIPARP, SERPINB1A, HFE, RDX, UBE2V2, AZIN1, LRIG2, EDEM1, MYCBP2, OAZ2, IRAK3, SUMO2, ARIH1, SUMO1, FBXW7, WAC, NEDD4L, RCHY1, NRDC, RNF14, APC, CSNK1A1, RNF144B, TAF1, NUB1, NDFIP1, SMAD3…	68	0.00138175	2.85957
DG	Upregulated	GOTERM_BP_FAT	GO:0006892~post-Golgi vesicle-mediated transport	TGOLN2, MYO5A, CCDC93, VPS54, RP2, AP1AR, KIF16B, ARFGEF2, MON2, EPS15, SCFD1, STXBP6, RBSN, RAB14, DOPEY1, EXOC5, RAB10, ANKFY1, EXOC2, KLHL20	20	0.00096269	3.01651
DG	Upregulated	GOTERM_BP_FAT	GO:0006915~apoptotic process	MRPL41, PTGS2, AIF1, PPP2R5C, NAA15, NAA16, SGMS1, REST, ANKLE2, MEGF10, MAP3K7, CUL3, USP53, G2E3, SIN3A, BHLHB9, CTGF, KIFAP3, PIK3CA, OGT, NSMAF, CUL1, OXR1, OPA1, BRAF, ROCK1, ROCK2, SCN2A, LIFR, GRIN2A, MECP2, WNK3, LIG4, OPTN, PPARGC1A, MAPK1, CCR5, EIF2S1, F3, RYR2, MAPK9, MAPK8, EIF2AK2, EIF2AK3, TAF9B, STK17B, CHEK1, RFFL, NAA35, CD74, SEMA5A, KRAS, FCER1G, FAIM, LAMTOR5, COL18A1, TAOK1,…	272	0.000907714	3.04205
DG	Upregulated	GOTERM_BP_FAT	GO:0035556~intracellular signal transduction	ATP1B1, PTGS2, AIF1, IL6ST, PPP2R5C, ITSN2, RAB1A, CUL3, MAP3K7, G2E3, CTGF, PIK3C3, RAPGEF6, RAB23, PIK3CA, RAPGEF4, OGT, CAB39, RAB27B, SYK, MAGI3, OPA1, BRAF, ROCK1, MPDZ, ROCK2, PIK3CB, SCN2A, WNK1, WNK3, UBR1, OPTN, SYNJ2BP, PCLO, TANK, SPAG9, MAPK1, MAPK6, CCR5, LPAR6, ATP2C1, F3, RAB14, RYR2, MAPK9, MAPK8, ARL8B, RAB10, EIF2AK2, EIF2AK3, RALGPS1, STK17B, AKAP11, RFFL, RIMS2, ARFGEF2, ARFGE…	374	0.000872193	3.05939
DG	Upregulated	GOTERM_BP_FAT	GO:0032411~positive regulation of transporter activity	ATP1B1, ATP1B3, KMT2A, FGF14, CACNB2, AKAP9, SUMO1, ANK2, DMD, PKD2, STK39, ASPH, NEDD4L, S100A1, SGK1, CACNA2D1, TRPC6, KIF5B, SGK3, STIM2, WNK1, CFTR, WNK3, CTSS, AKAP6, RYR2, CRACR2A, CALM1	28	0.000723332	3.14066
DG	Upregulated	GOTERM_BP_FAT	GO:0042073~intraciliary transport	RPGR, TTC26, TTC21B, TTC30A1, BBS12, PCM1, NME7, TRAF3IP1, WDR19, LCA5, IFT57, DYNC2H1, IFT81, SSX2IP, IFT74	15	0.000627851	3.20214
DG	Upregulated	GOTERM_BP_FAT	GO:0042073~intraciliary transport	RPGR, TTC26, TTC21B, TTC30A1, BBS12, PCM1, NME7, TRAF3IP1, WDR19, LCA5, IFT57, DYNC2H1, IFT81, SSX2IP, IFT74	15	0.000627851	3.20214
DG	Upregulated	GOTERM_BP_FAT	GO:0016050~vesicle organization	SYT1, SYT4, CHMP5, SYT6, CD2AP, RAB1A, TMF1, CUL3, KIF13A, PICALM, VPS4B, VPS4A, TBPL1, AP3B1, STX3, KIF5B, RAB39A, PRKCI, VPS41, ZDHHC15, STXBP6, USO1, RAB14, VAMP4, KLHL12, PLA2G3, ANKFY1, SNAP29, SNX19, MOB4, CLCN3, SNX6, SNX5, SNX7, SNX2, EEA1, SNX4, ABCA1, CHMP2B, STX12, RBSN, GOLPH3L, FBXO5, PAFAH1B1, SEC23IP, SNAP25, VAV3, SNAPIN, PLA2G4A, P2RX7, GOLPH3, SYT14, SYTL5, SYTL2, RAB38	55	0.000509184	3.29312
DG	Upregulated	GOTERM_BP_FAT	GO:0043484~regulation of RNA splicing	SRSF1, SRSF10, TRA2B, TRA2A, RBM5, RBM7, HNRNPLL, CLK1, WTAP, UHMK1, SETX, AGGF1, HNRNPF, CLK4, CDK12, PTBP3, PTBP2, AHNAK, PIK3R1, ZFP326, SREK1, FMR1, HNRNPA2B1, YTHDC1, SNW1, MBNL2, AFF2, DDX5, RBMX, SRSF3, SON, SRSF7, SRSF6, HNRNPH1, RBM25L1	35	0.000292718	3.53355
DG	Upregulated	GOTERM_BP_FAT	GO:0060249~anatomical structure homeostasis	RAD51D, NBN, VPS54, ADGRF5, XRCC6, TLR4, CXADR, PRDX1, B2M, CCNE2, WDR36, CTGF, NSMCE2, MKKS, CEP290, STK39, DHX36, SCX, AKT3, GNL3, SYK, HNRNPA2B1, BBS12, CTSS, RB1, RAD50, HNRNPU, PBLD1, DCLRE1C, MAPK1, DCLRE1A, HIF1A, LCA5, CFL2, MDM1, NEK7, IQCB1, BBS4, CLCN3, BLM, KMT2A, MAPKAPK5, CYTL1, PRKDC, CHMP2B, NPHP3, KRAS, UBASH3B, DMD, SLC28A2, TRAF6, APC, LYZ2, HMBOX1, SMC5, ACACA, BRCA2, SMC6, SM…	76	0.000170463	3.76837
DG	Upregulated	GOTERM_BP_FAT	GO:0007064~mitotic sister chromatid cohesion	WAPL, RAD21L1, PDS5B, NIPBL, RAD21, PDS5A, NAA50, SMC1A, SMC3	15	0.000163195	3.78729
DG	Upregulated	GOTERM_BP_FAT	GO:0000723~telomere maintenance	RAD51D, NBN, BLM, MAPKAPK5, XRCC6, PRKDC, CCNE2, NSMCE2, DHX36, GNL3, HMBOX1, HNRNPA2B1, SMC5, SMG1, SMC6, BRCA2, ATR, WRN, HNRNPA1, NOP10, ATM, HNRNPU, RAD50, DCLRE1C, ATRX, MAPK1, DCLRE1A, CCT8, PCNA, SLC25A16, PARP1, NEK7	32	0.000157738	3.80206
DG	Upregulated	GOTERM_BP_FAT	GO:0010605~negative regulation of macromolecule metabolic process	AIF1, XRCC6, SYNCRIP, ZFP639, REST, ERLEC1, CUL3, N4BP2L2, SIN3A, PICALM, CTGF, WWP1, RAB23, PTBP3, OGT, PTBP2, S100A1, STAG2, CCAR1, OXR1, IBTK, GTPBP4, ROCK1, C4B, ROCK2, STRN3, ZHX1, MECP2, WNK1, GRIN2A, OPTN, SYNJ2BP, DCAF1, PPARGC1A, EIF2AK1, PRDM4, RFC1, ZFP280C, MTF2, ZFP280D, UBR5, EIF2S1, TFPI, TGIF1, ST18, EIF2AK2, EIF2AK3, SRSF10, TFCP2L1, TAF9B, HFE, MYEF2, CHEK1, RFFL, MYT1, DUSP19, …	364	0.000149399	3.82565
DG	Upregulated	GOTERM_BP_FAT	GO:0010605~negative regulation of macromolecule metabolic process	AIF1, XRCC6, SYNCRIP, ZFP639, REST, ERLEC1, CUL3, N4BP2L2, SIN3A, PICALM, CTGF, WWP1, RAB23, PTBP3, OGT, PTBP2, S100A1, STAG2, CCAR1, OXR1, IBTK, GTPBP4, ROCK1, C4B, ROCK2, STRN3, ZHX1, MECP2, WNK1, GRIN2A, OPTN, SYNJ2BP, DCAF1, PPARGC1A, EIF2AK1, PRDM4, RFC1, ZFP280C, MTF2, ZFP280D, UBR5, EIF2S1, TFPI, TGIF1, ST18, EIF2AK2, EIF2AK3, SRSF10, TFCP2L1, TAF9B, HFE, MYEF2, CHEK1, RFFL, MYT1, DUSP19, …	364	0.000149399	3.82565
DG	Upregulated	GOTERM_BP_FAT	GO:0080134~regulation of response to stress	ATP1B1, PTGS2, ERLEC1, MAP3K7, CD47, SIN3A, VPS13C, CTGF, CFH, OGT, SYK, OXR1, MAGI3, OPA1, BRAF, COLEC12, MAPK1, SPAG9, EIF2AK1, CCR5, UBR5, EIF2S1, MAPK9, EIF2AK2, NEK4, EIF2AK3, MDH1, SCN1A, NEK1, ENPP4, CHEK1, ARFGEF1, CD74, DUSP19, KRAS, UBASH3B, KLKB1, FCER1G, TAOK1, MAP2K4, TAOK3, NDFIP1, SMAD3, SLAMF8, ATR, HGF, DDX5, ATM, BFAR, PLA2G4A, CD55, PARP9, SRSF6, PCNA, TGFBR3, PARP1, RTN4, CREB…	209	0.000133092	3.87585
DG	Upregulated	GOTERM_BP_FAT	GO:0010608~posttranscriptional regulation of gene expression	NCBP2, NCBP1, RNASEL, APOBEC1, PSTK, CPEB2, IMPACT, CPEB4, RBM3, DICER1, CNOT2, SYNCRIP, RPS27L, RPS6KB1, EIF2A, CPEB1, CNOT6, EIF4EBP3, TARDBP, PIWIL2, RC3H2, EIF1, PUM2, DNAJC3, USP16, TPR, RMND1, RC3H1, ZCCHC11, HNRNPA2B1, FMR1, HNRNPU, OGFOD1, SARNP, EIF4G2, MAPK1, PA2G4, EIF2AK1, EIF4A2, EIF2S1, NCK1, EIF4A1, EPB41L5, RNF139, EIF2AK2, EIF5A2, XRN1, EIF2AK3, MATR3, SERP1, VIP, MAPKAPK5, ANGEL…	86	8.28353e-05	4.08178
DG	Upregulated	GOTERM_BP_FAT	GO:1990778~protein localization to cell periphery	ATP1B1, ATP1B3, DPP10, FGF13, CLTC, LZTFL1, KCNIP4, KIF13A, DAB2, ANK2, TMEM59, RAPGEF6, PLS1, VPS4A, GOLGA4, DLG1, PID1, STX3, ROCK1, KIF5B, ROCK2, MPP5, PRKCI, WNK3, LYPLA1, OPTN, GCC2, EPB41L3, RAB11FIP2, CLIP1, VAMP4, RAB10, KALRN, MYO5A, CACNB2, RDX, CDH1, MACF1, GOLPH3L, EFR3A, RAB11A, FCER1G, VPS35, FCHO2, ACSL3, PIK3R1, HECTD1, CNST, PDZD11, LIN7C, APPL1, TULP3, GOLPH3, DENND4C, LRP6, SPT…	58	8.03278e-05	4.09513
DG	Upregulated	GOTERM_BP_FAT	GO:0048193~Golgi vesicle transport	TGOLN2, SEC24A, ATL2, AP1AR, RP2, VPS54, RAB1A, CUL3, COPB1, GOLGA1, RAB6A, GOLGA5, GOLGA4, KLHL20, SEC23A, PRKCI, VPS41, KIF16B, OPTN, GCC2, ERGIC2, COPG2, DNAJC28, STXBP6, TRAPPC8, USO1, RAB14, VAMP4, KLHL12, RAB10, ANKFY1, SPAST, MYO5A, CCDC93, SNX2, ARFGEF2, LMAN1, RBSN, GOLPH3L, BCAP29, EXOC4, DOPEY1, EXOC5, TRIP11, SEC23IP, EXOC2, RAB2A, MON2, COG3, EPS15, SCFD1, CNIH4, GOLPH3	53	6.30724e-05	4.20016
DG	Upregulated	GOTERM_BP_DIRECT	GO:0006511~ubiquitin-dependent protein catabolic process	DZIP3, PPP2R5C, CD2AP, RNF213, ERLEC1, CUL3, CUL2, CUL5, DAB2, UBXN2A, UBXN2B, WWP1, VPS4B, FBXO25, VPS4A, ITCH, CUL1, USP1, ANAPC4, UBR3, SOCS4, UBE2J2, UBR1, SKP1, PSMA2, PSMA4, UBR5, PSMA3, RNF139, LRRK2, RNF20, TRIM39, GCLC, BBS7, UBA6, HFE, UBE2V2, RFFL, TTC3, PLAA, ARIH1, FBXW7, UBE2D3, KBTBD4, OTUD7B, RNF168, RCHY1, FBXO9, RNF14, HECTD1, TAF1, NDFIP1, HACE1, PCNP, BFAR, PSMC6, CRBN, DNAJB9…	46	5.15954e-05	4.28739
DG	Upregulated	GOTERM_BP_FAT	GO:0006413~translational initiation	IMPACT, BDP1, EIF2A, RPS6KB1, POLR2D, MTIF2, UHMK1, PAIP2B, EIF4EBP3, EIF3A, DDX3X, EIF1, EIF3J, TPR, DNAJC3, EIF3M, RPS24, EIF2S3Y, PAIP2, FMR1, SSB, DENR, EIF1A, ATF4, EIF2AK1, EIF4E, EIF4A2, EIF2S1, NCK1, EIF4A1, EIF2AK2, EIF5A2, YAE1D1, MCTS1, EIF2AK3	35	4.98138e-05	4.30265
DG	Upregulated	GOTERM_BP_FAT	GO:0044093~positive regulation of molecular function	RAB3GAP2, HMGN3, ATP1B1, ATP1B3, RP2, REST, ITSN2, B2M, MAP3K7, PICALM, CTGF, RAPGEF6, RAPGEF4, AFDN, OGT, CAB39, NSMAF, S100A1, SYK, MAGI3, BRAF, KIF5B, WNK1, WNK3, RIC8B, PPARGC1A, TANK, SPAG9, MAPK1, EIF2S1, F3, ACAP2, RYR2, MAPK9, MAPK8, EIF2AK2, EIF2AK3, NEK7, RALGPS1, PFKFB2, HFE, ASAP1, CACNB2, ARFGEF2, OCRL, ARFGEF1, MYO9A, CD74, PLAA, DUSP19, KRAS, DMD, SERINC1, TRPC6, OSBPL8, TAOK1, TGF…	270	4.92161e-05	4.30789
DG	Upregulated	GOTERM_BP_FAT	GO:0022613~ribonucleoprotein complex biogenesis	NAF1, RNASEL, FASTKD2, SNRPD1, RBM5, CNOT2, RPS27L, CNOT7, CNOT6, SETX, RSL1D1L1, PSIP1, LUC7L2, TFB2M, DDX21, ZRSR2, PUM2, DDX20, PTBP2, GNL2, RC3H1, LUC7L3, GNL3, KRR1, GTPBP4, PAN3, BICD1, NVL, OGFOD1, PA2G4, SLU7, TFB1M, MCTS1, SDAD1, SRSF10, EIF3A, RPS27, RPS28, DDX3X, CNOT6L, BRIX1, RPL5, EIF3J, EIF3M, RPS24, TSR1, MPHOSPH10, YTHDC1, DENR, ATR, NOP10, RPF2, RBMX, GCFC2, ATM, DDX6, TSC1, SRS…	100	1.31742e-05	4.88028
DG	Upregulated	GOTERM_BP_FAT	GO:0006302~double-strand break repair	RAD51D, NBN, XRCC6, INO80, DEK, SETX, SWI5, RAD21, NSMCE1, NSMCE2, LIG4, RAD50, RBBP8, UBE2N, DCLRE1C, RECQL, NABP1, DCLRE1A, EYA1, RIF1, FBXO18, UBR5, SMARCA5, SMARCAD1, RAD21L1, PPP4R2, BLM, SLF2, SLF1, POLA1, PRKDC, CHEK1, UBE2V2, FAN1, SFR1, POLN, RNF168, TRIP12, MSH2, SMC5, SMC6, BRCA2, WRN, UIMC1, ATM, PARP9, TDP2, SFPQ, PARP1, SLC25A16	50	1.07406e-05	4.96897
DG	Upregulated	GOTERM_BP_FAT	GO:0010970~establishment of localization by movement along microtubule	MYO5A, DYNC1LI2, TTC26, AP3S1, RAB1A, BLOC1S6, KIF13A, WDR19, BLOC1S2, AP3M1, RASGRP1, DYNC2H1, PAFAH1B1, SSX2IP, AP3B1, KIF3A, RPGR, KIF5B, TTC21B, TTC30A1, MAP1B, SNAPIN, BBS12, PCM1, BICD1, NME7, TRAF3IP1, HIF1A, LCA5, IFT57, RHOT1, IFT81, WDR43, DST, SPAST, IFT74	36	4.09241e-06	5.38802
DG	Upregulated	GOTERM_BP_FAT	GO:0000278~mitotic cell cycle	SEPT2, AIF1, CHMP5, PPP2R5C, INO80, RPS27L, RPS6KB1, ANKLE2, CD2AP, CUL3, SIN3A, RAD21, VPS4B, VPS4A, CCNA1, PID1, STK26, ANAPC4, TOPBP1, PKIA, WEE1, NABP1, MCMBP, ARL8B, NEK4, SEPT7, CEP97, FGFR2, BBS4, HMGB1, RAD21L1, BLM, SLF2, ANAPC15, SLF1, ANLN, CHEK1, CNTRL, ANGEL2, CHMP2B, WAPL, NIPBL, DDX3X, NAA50, TFDP2, FBXO5, SETDB2, TAOK3, CDC23, BRCA2, SMAD3, ATAD5, SPDL1, INSC, CDC27, ATM, EIF4E, U…	145	2.24864e-06	5.64808
DG	Upregulated	GOTERM_BP_FAT	GO:0051640~organelle localization	SYT1, DYNC1LI2, SYT4, PLXNA2, FGF14, CHMP5, SYT6, RAB1A, CUL3, CCDC141, KIF13A, MEI1, DAB1, VPS4B, VPS4A, OGT, RAB27B, SYK, CEP83, KIF5B, BRAF, FMR1, SYNJ2BP, PCM1, PCLO, DCTN4, BICD1, TMEM106B, HIF1A, OPHN1, ARL8B, LRRK2, ANKFY1, FGFR2, RAD21L1, SDAD1, SNX6, SNX4, NAPB, RIMS2, CHMP2B, BLOC1S6, BLOC1S2, DMD, FCER1G, MOBP, NIN, CDC23, BRCA2, SNAPIN, SPDL1, DOCK7, INSC, ATM, P2RX7, CD300A, IKBKG, R…	102	8.39562e-07	6.07595
DG	Upregulated	GOTERM_BP_FAT	GO:0007034~vacuolar transport	TGOLN2, RAB9A, CHMP5, VPS54, AP1AR, VPS50, CLTC, HOOK1, KIF13A, DAB2, PICALM, EVI5, VPS13C, DNAJC13, VPS13D, ZFYVE16, PIK3C3, VPS4B, VPS4A, VPS13A, MSN, RAB6A, KLHL20, AP3B1, GPRASP1, VPS41, KIF16B, GCC2, MAPK1, TMEM106B, SPAG9, SCYL2, TRAPPC8, RAB14, LRRK2, RAB10, VPS26A, ANKFY1, VPS29, SNX6, SNX5, SNX16, SNX2, RDX, SNX4, ABCA1, LMAN1, CHMP2B, MTMR2, BLOC1S6, RBSN, PIKFYVE, TBC1D5, INPP5F, VPS35…	69	8.10482e-07	6.09126
DG	Upregulated	GOTERM_BP_FAT	GO:0000245~spliceosomal complex assembly	SRSF1, SRPK2, TXNL4B, GEMIN2, SRSF10, CRNKL1, RBM5, SNRPD1, PRPF39, YTHDC1, RBMX, GCFC2, SETX, SF3B1, SCAF11, SRSF6, PSIP1, SLU7, LUC7L2, ZRSR2, PTBP2, LUC7L, LUC7L3	23	6.43885e-07	6.19119
DG	Upregulated	GOTERM_BP_FAT	GO:0000245~spliceosomal complex assembly	SRSF1, SRPK2, TXNL4B, GEMIN2, SRSF10, CRNKL1, RBM5, SNRPD1, PRPF39, YTHDC1, RBMX, GCFC2, SETX, SF3B1, SCAF11, SRSF6, PSIP1, SLU7, LUC7L2, ZRSR2, PTBP2, LUC7L, LUC7L3	23	6.43885e-07	6.19119
DG	Upregulated	GOTERM_BP_FAT	GO:0032880~regulation of protein localization	HMGN3, SEPT2, RAB9A, SYT4, PTGS2, IL18, XPO4, TNFSF15, PDE3B, TLR3, TLR4, PMAIP1, REST, TLR6, CD2AP, LZTFL1, TLR7, ERLEC1, IQGAP1, WDR75, DAB2, SIN3A, PICALM, STARD7, TARDBP, PIK3C3, PLS1, RAB23, CEP290, VPS4A, RAPGEF4, AFDN, ASPH, OGT, SYK, GNL3, PID1, KIF5B, UGCG, LYPLA1, WNK3, SIX4, SYNJ2BP, UBE2J2, PCM1, CDKL2, PKIA, GCC2, CTDSPL2, RALGAPA2, HIF1A, CCR5, UBR5, VSNL1, RAB14, AKAP5, VAMP4, AKAP…	192	6.34401e-07	6.19764
DG	Upregulated	GOTERM_BP_FAT	GO:0010256~endomembrane system organization	RAB3GAP2, ATP1B1, ATP1B3, SHTN1, FGF13, ANKLE2, RAB1A, KIF13A, HOOK1, DAB2, UBXN2A, ANK2, UBXN2B, COL4A3BP, TARDBP, PIK3C3, PLS1, RAPGEF6, DYNC2H1, VPS4B, VPS4A, TBPL1, PID1, TOR1AIP2, ROCK1, KIF5B, ROCK2, LYPLA1, WNK3, PARP11, OPTN, GCC2, MAPK1, USO1, VAMP4, CLIP1, LRRK2, RAB10, EIF2AK3, KALRN, ASAP1, CACNB2, ABCA1, LMAN1, ARFGEF2, ARFGEF1, CHMP2B, MACF1, GOLPH3L, EFR3A, FCER1G, ZMPSTE24, FCHO2,…	115	2.59873e-07	6.58524
DG	Upregulated	GOTERM_BP_FAT	GO:0007017~microtubule-based process	DYNC1LI2, CHMP5, INO80, FGF13, RAB1A, KIF13A, STARD9, KIFAP3, VPS4B, DYNC2H1, VPS4A, LRRC6, KIF5B, ROCK2, KIF5A, KIF5C, PCM1, NME7, BICD1, GCC2, WEE1, TRIM37, HIF1A, CEP350, SPAG6, LCA5, IGBP1, FGFR1OP, CC2D2A, VAMP4, CLIP1, MAPK8, MAP7D2, DST, CEP97, DNAH11, BBS4, DNAH12, CCDC13, CHEK1, CHMP2B, BLOC1S6, BLOC1S2, FBXO5, CCSER2, SSX2IP, KIF3A, NIN, CKAP5, TTC21B, DRC1, BRCA2, SPDL1, SNAPIN, DOCK7,…	137	7.07909e-08	7.15002
DG	Upregulated	GOTERM_BP_FAT	GO:0006281~DNA repair	RAD51D, XRCC6, INO80, RPS27L, SETX, RAD21, PMS2, PMS1, POLK, USP1, LIG4, DCLRE1C, NABP1, DCLRE1A, RFC1, ASCC3, FBXO18, UBR5, SMARCA5, BIVM, HMGB1, RAD21L1, BLM, SLF2, SLF1, UBE2V2, CHEK1, RRM2B, UBE2D3, POLN, RNF168, TAOK1, TP53BP1, TAOK3, BRCA2, ATR, WRN, UIMC1, ATM, POLD4, PARP9, PCNA, SLC25A16, PARP1, SMC1A, PARP2, NBN, DEK, SWI5, NSMCE1, PARG, NSMCE2, INO80C, REV1, MBD4, GTF2H5, CDK7, CDC5L, …	97	4.17846e-08	7.37898
DG	Upregulated	GOTERM_BP_FAT	GO:0030030~cell projection organization	SYT1, SYT4, AIF1, DYNC2LI1, STRN, ITSN2, RAB1A, B2M, CUL3, PICALM, BHLHB9, DYNC2H1, RAB23, PLS1, RAPGEF6, CEP290, RAPGEF4, LRRC7, CEP295, LRRC6, OPA1, BRAF, KIF5B, ROCK1, KIF5A, ROCK2, KIF5C, LIFR, MECP2, CDHR5, PCM1, NME7, CTNNA2, CEP162, SPAG6, CCR5, MAPK6, ZFP280C, LCA5, ZFP280D, CC2D2A, MAPK9, MAPK8, RAB10, IQCB1, NEK1, UBA6, ASAP1, RIMS2, OCRL, ARFGEF1, UHMK1, ALCAM, SEMA5A, NPHP3, MACF1, DM…	266	1.95444e-08	7.70898
DG	Upregulated	GOTERM_BP_FAT	GO:0080135~regulation of cellular response to stress	GRIK2, IMPACT, TLR3, TLR4, PMAIP1, ANKRD6, TLR6, ERLEC1, MAP3K7, DAB2, VPS13C, CTGF, ITCH, OGT, SPRED1, DNAJC3, ZFP277, OXR1, SYK, MAGI3, OPA1, BRAF, USP1, STK26, FMR1, SPAG9, MAPK1, EIF2AK1, HIF1A, NBR1, IGBP1, UBR5, FBXO18, MAPK9, EIF2AK2, NEK4, LRRK2, EIF2AK3, HMGB1, BLM, NEK1, SLF2, PNPT1, SLF1, LRIG2, CHEK1, UBE2V2, GREM1, CD74, FBXW7, DUSP19, KRAS, DNAJA1, RNF168, SKIL, TRAF6, ARL6IP5, FGD4…	126	1.52246e-08	7.81745
DG	Upregulated	GOTERM_BP_FAT	GO:0051276~chromosome organization	RAD51D, HMGN3, CHMP5, XRCC6, REST, MAP3K7, CUL3, MEI1, WDR75, EPC2, SIN3A, VPS4B, VPS4A, DHX36, OGT, STAG2, ESCO1, MTERF1, ROCK2, ANAPC4, MECP2, LIG4, SKP1, DCAF1, DCLRE1C, MAPK1, DCLRE1A, ASCC3, MTF2, UBR5, MAPK8, NEK7, TDRD3, RAD21L1, TAF9B, TADA1, CHEK1, ZFP451, NAA50, LEO1, WDHD1, CDC23, SPDL1, ATR, NOP10, HNRNPA1, CDC27, ATM, CCT8, PCNA, SUPT16H, PARP1, KAT6A, ENY2, NAP1L1, NAP1L3, CPEB1, NA…	206	1.20129e-08	7.92035
DG	Upregulated	GOTERM_BP_FAT	GO:0007049~cell cycle	RAD51D, MRPL41, PTGS2, CHMP5, AIF1, PPP2R5C, ANKLE2, CD2AP, KIF13A, CUL3, MEI1, SIN3A, CTGF, PIK3C3, VPS4B, VPS4A, CCNA1, STAG2, HFM1, ESCO1, GTPBP4, ROCK2, ANAPC4, MAPK1, PRDM4, MAPK6, MAPK8, ARL8B, NEK4, MCTS1, RAD21L1, NEK1, AHCTF1, CHEK1, CNTRL, ANGEL2, UHMK1, NAA50, FBXO5, PRPF40A, TAOK1, TP53BP1, TAOK3, SMAD3, CDC23, SPDL1, PCNP, ATR, CDC27, SEPT11, ATM, RGS2, DMTF1, UBA3, PCNA, TMOD3, MAP9…	250	7.6001e-09	8.11918
DG	Upregulated	GOTERM_BP_FAT	GO:0051128~regulation of cellular component organization	ITSN2, B2M, CUL3, MAP3K7, WDR75, BHLHB9, CTGF, VPS4B, PLS1, VPS4A, DHX36, OGT, LRRC7, SYK, OPA1, KIF5B, ROCK1, BRAF, ROCK2, C4B, UGCG, MECP2, VPS41, CDHR5, LIG4, UBE2J2, CTNNA2, OGFOD1, MAPK1, MAPK6, SCYL2, FCHSD2, MAPK9, MAPK8, EIF2AK2, HFE, ARFGEF1, SDHAF2, PRPF40A, KIF3A, TAOK1, TGFBR1, ATR, HGF, SERPINI1, GAS7, ATM, FNIP2, RGS2, CD300A, MAP2, TGFBR3, MAP9, PARP1, RTN4, DPP10, SYNJ1, BNIP3, LA…	413	2.90814e-09	8.53638
DG	Upregulated	GOTERM_BP_FAT	GO:0070925~organelle assembly	RAB3GAP2, SEPT2, FASTKD2, CHMP5, DYNC2LI1, CNOT2, INO80, RPS27L, CNOT7, CNOT6, RAB1A, TBC1D15, STARD9, PIK3C3, PLS1, VPS4B, RAB23, DYNC2H1, VPS4A, STAM, PUM2, RC3H1, TBPL1, CEP295, LRRC6, CEP83, PAN3, SIX4, PCM1, BICD1, OGFOD1, TRIM37, CEP162, SPAG6, TRAPPC8, CC2D2A, RAB14, MAPK9, MAPK8, LRRK2, SEPT7, IQCB1, CEP97, BBS4, BBS5, BBS7, CCDC13, NEK1, B9D1, ASAP1, OCRL, CHMP2B, RPS27, STX12, RPS28, TT…	149	2.59664e-09	8.58559
DG	Upregulated	GOTERM_BP_FAT	GO:0008380~RNA splicing	SRSF1, NCBP2, NCBP1, PRPF4B, CRNKL1, ZFP638, CWC15, RBM5, SNRPD1, SYNCRIP, RBM7, HNRNPLL, WTAP, CTNNBL1, SETX, TARDBP, LSM5, CDK12, PSIP1, LUC7L2, ZRSR1, PTBP3, PTBP2, DDX20, ZRSR2, LUC7L3, SNRPA1, SRPK2, RBM41, ZFP326, HNRNPA2B1, FMR1, PRPF39, MBNL2, PRPF3, CDC5L, AQR, SLU7, SCAF8, PRPF38B, RBM25L1, THOC1, SRSF10, TRA2B, SNRPB2, TRA2A, ZCRB1, UHMK1, HNRNPA3, SF3B1, DDX46, SCAF11, HTATSF1, HNRNPF…	84	2.51784e-09	8.59897
DG	Upregulated	GOTERM_BP_FAT	GO:0006974~cellular response to DNA damage stimulus	RAD51D, PPP2R5C, XRCC6, TIPINL1, INO80, RPS27L, PMAIP1, SETX, RAD21, PMS2, SPRED1, PMS1, POLK, MYO6, USP1, FMR1, TOPBP1, LIG4, TANK, DCLRE1C, MAPK1, DCLRE1A, NABP1, RFC1, ASCC3, UBR5, FBXO18, ZFP791, SMARCAL1, SMARCA5, BIVM, NEK4, MCTS1, HMGB1, RAD21L1, BLM, CCDC13, NEK1, SLF2, SLF1, CHEK1, UBE2V2, RRM2B, CD74, FBXW7, UBE2D3, NIPBL, DNAJA1, POLN, RNF168, SKIL, TRAF6, SHPRH, VAV3, TAOK1, TP53BP1, …	154	7.48206e-11	10.126
DG	Upregulated	GOTERM_BP_FAT	GO:0043632~modification-dependent macromolecule catabolic process	DZIP3, PPP2R5C, CD2AP, RNF213, ERLEC1, CUL3, CUL2, CUL5, DAB2, UBXN2A, UBXN2B, WWP1, VPS4B, FBXO25, VPS4A, ITCH, CUL1, USP1, ANAPC4, UBR3, SOCS4, UBE2J2, UBR1, SKP1, PSMA2, PSMA4, UBR5, PSMA3, RNF139, LRRK2, RNF20, TRIM39, GCLC, BBS7, PNPT1, UBA6, HFE, UBE2V2, RFFL, TTC3, PLAA, ARIH1, FBXW7, UBE2D3, KBTBD4, OTUD7B, RNF168, ZMPSTE24, RCHY1, FBXO9, RNF14, HECTD1, TAF1, NDFIP1, HACE1, PCNP, BFAR, PS…	132	1.27864e-11	10.8933
DG	Upregulated	GOTERM_BP_FAT	GO:0070647~protein modification by small protein conjugation or removal	DZIP3, MED21, RNF213, ZNRF2, CUL3, CUL2, USP53, G2E3, CUL5, USP54, WWP1, OGT, CUL1, GTPBP4, ANAPC4, UBR3, UBE2J2, SKP1, DCAF1, TANK, UBR5, MAPK9, FBXL4, HFE, UBA6, RFFL, ARIH1, ZFP451, KBTBD2, KBTBD4, KBTBD3, KBTBD8, FBXO5, LEO1, RCHY1, FBXO3, FBXO9, TGFBR1, NDFIP1, NDFIP2, CDC23, PCNP, CDC27, BFAR, UBA2, UBA3, ENY2, COPS2, COPS5, COPS3, SENP5, RLIM, SENP6, BAG5, NSMCE1, NSMCE2, USP16, USP15, USP…	194	8.80407e-14	13.0553
DG	Upregulated	GOTERM_BP_FAT	GO:0044085~cellular component biogenesis	NAF1, AIF1, XRCC6, REST, CUL3, MAP3K7, BHLHB9, CTGF, PIK3C3, VPS4B, PLS1, VPS4A, LUC7L2, PTBP2, OGT, CAB39, LUC7L3, TBPL1, PLS3, KRR1, LRRC6, OPA1, BRAF, ROCK1, ROCK2, MECP2, GRIN2A, VPS41, CDHR5, PCM1, PCLO, OGFOD1, ST13, SPAG9, SPAG6, TRAPPC8, FCHSD2, MAPK9, MAPK8, EIF2AK2, EIF2AK3, MCTS1, RAD21L1, SDAD1, AHCTF1, KCNJ2, RIC3, ARFGEF1, ARG1, RPS27, RPS28, SEC23IP, RPS24, KIF3A, TGFBR1, ACACA, AT…	489	1.1637e-14	13.9342
DG	Upregulated	GOTERM_BP_FAT	GO:0006396~RNA processing	NCBP2, NCBP1, NAF1, RNASEL, APOBEC1, PRPF4B, RNMT, ZFP638, RBM3, RBM5, SNRPD1, SYNCRIP, RBM7, WTAP, CTNNBL1, SETX, RSL1D1L1, TARDBP, INTS6, LSM5, PSIP1, TFB2M, LUC7L2, PTBP3, DHX36, ZRSR1, DDX21, PTBP2, DDX20, ZRSR2, TGS1, LUC7L3, KRR1, SNRPA1, GTPBP4, PAN3, ZFP326, FMR1, HNRNPA2B1, CSTF2T, PCF11, PA2G4, AQR, DHX29, TRMT11, TRMT13, SLU7, TFB1M, SCAF8, RNF20, RBM25L1, TDRD3, PUS3, FIP1L1, SRSF10, …	178	1.16738e-15	14.9328
DG	Upregulated	GOTERM_BP_FAT	GO:0006464~cellular protein modification process	AIF1, EHHADH, NAA15, NAA16, REST, CLK1, MED21, ANKLE2, MAP3K7, CUL3, CUL2, WDR75, USP53, EPC2, CUL5, USP54, CTGF, CLK4, PIK3C3, PIK3CA, CAB39, OGT, CUL1, SYK, IBTK, MAGI3, BRAF, ROCK1, ROCK2, MECP2, UBE2J2, SCYL3, SKP1, DCAF1, CTDSPL2, OGFOD1, SPAG9, MAPK1, NPC1, EIF2AK1, MAPK6, SCYL2, EIF2S1, MAPK9, MAPK8, EIF2AK2, EIF2AK3, UBA6, HFE, ARFGEF1, SDHAF2, NAA35, ARIH1, DUSP19, KBTBD2, KBTBD4, NAA30,…	625	1.12366e-18	17.9494
DG	Upregulated	GOTERM_BP_FAT	GO:0016070~RNA metabolic process	NAF1, XRCC6, NAA15, SYNCRIP, REST, CLK1, WTAP, MED21, MAP3K7, CUL3, WDR75, EPC2, CLK4, INTS6, LSM5, LUC7L2, DHX36, PTBP3, OGT, PTBP2, LUC7L3, TBPL1, STAG1, CCAR1, SYK, KRR1, ZHX1, MECP2, MED14, LIG4, MED13, DCAF1, CTDSPL2, MED19, MAPK1, DCAF6, AQR, DHX29, ZFP280C, ASCC3, ZFP280D, SMARCAL1, RYR2, MAPK9, TGIF1, MAPK8, ST18, SCAF8, EIF2AK2, EIF2AK3, MCTS1, GATB, PUS3, AHCTF1, MYEF2, ZCRB1, HFE, MYBL…	705	2.37561e-21	20.6242
DG	Upregulated	GOTERM_BP_FAT	GO:0051641~cellular localization	TGOLN2, PTGS2, VPS54, VPS50, SSR1, CUL3, CCDC141, WDR75, PIK3C3, VPS4B, PLS1, VPS4A, OGT, RAB27B, HTR1F, SYK, IBTK, BRAF, KIF5B, ROCK1, ROCK2, SRP54A, KIF5A, KIF5C, UGCG, VPS41, UBE2J2, PCM1, PCLO, NME7, CTDSPL2, SPAG9, MAPK1, NPC1, NPC2, TRAPPC8, SCYL2, RYR3, MAPK9, RYR2, ARL8B, EIF2AK3, RAD21L1, SDAD1, MTX3, MTX2, CACNB2, HFE, RIC3, UBASH3B, GOLPH3L, EFR3A, SLC28A2, SEC23IP, DHX9, RANBP17, KIF3…	468	2.25042e-22	21.6477
DG	Upregulated	GOTERM_CC_DIRECT	GO:0035869~ciliary transition zone	TMEM67, BBS4, TRAF3IP1, SEPT2, TTBK2, B9D1, CC2D2A, CETN3, RPGRIP1L, CEP290, PCM1	11	0.0466126	1.3315
DG	Upregulated	GOTERM_CC_DIRECT	GO:0009898~cytoplasmic side of plasma membrane	PTPRC, EPB41, SHROOM4, PTPN4, CDH1, BIRC2, ATP2B1, G6PD, RGS2, PTP4A1, MSN, SPTA1, TRAF6, CHUK, DLG1	15	0.044324	1.35336
DG	Upregulated	GOTERM_CC_DIRECT	GO:0030426~growth cone	SHTN1, USP9X, UTRN, DICER1, ABI1, LRIG2, FGF13, CPEB1, CXADR, IQGAP1, SETX, EXOC4, RAPGEF4, PAFAH1B1, PAK1, PTBP2, SNAP25, APC, STX3, PTPRZ1, MAP1B, FMR1, PCDH9, PCLO, RUFY3, PPP1R9A, PPP1R2, TSC1, GRIA2, GSK3B, ERC2, LRRK2, CALM1	33	0.0407555	1.38981
DG	Upregulated	GOTERM_CC_DIRECT	GO:0030054~cell junction	SYT1, ATP1B1, SYT4, CHMP5, CADM2, STRN, AQP4, SYT6, CD53, CD2AP, RAB1A, B2M, USP53, AFDN, LRRC7, MAGI3, KIF5B, MPDZ, SCN2A, GRIN2A, OLA1, WNK3, LIG4, GID8, PCLO, CTNNA2, MAPK1, DCAF6, DHX29, ABCB1B, RAB10, ADD3, SCN1A, ASAP1, TADA1, ARFGEF2, RIMS2, KCNJ2, ALCAM, GAD2, KRAS, MACF1, DMD, OLFM3, TRPC6, TGFBR1, PPFIBP1, ARFIP1, HOMER1, SEPT11, NCKAP1, DDX6, MGC94199, CCT8, CDC42BPA, TMOD3, RTN4, FERM…	74	0.0405163	1.39237
DG	Upregulated	GOTERM_CC_FAT	GO:0035770~ribonucleoprotein granule	FASTKD2, CNOT2, CPEB1, CNOT7, POLR2D, IQGAP1, UHMK1, LSM14A, HNRNPA3, TOP1, TRIM5, SUMO1, DDX3X, TDRKH, PIWIL2, PUM2, NSUN2, TNRC6A, RC3H1, DHX9, PAN3, ROCK2, HNRNPA2B1, FMR1, GRSF1, NCL, HNRNPU, CAPRIN1, FXR1, DDX6, PSMA2, OGFOD1, EIF4E, PSMA4, PNRC2, TIAL1, EIF2S1, XRN1, CLOCK	39	0.0278218	1.55561
DG	Upregulated	GOTERM_CC_FAT	GO:0032806~carboxy-terminal domain protein kinase complex	MNAT1, ERCC5, CCNT1, TAF7, SNW1, RB1, HSPD1, CDK7, ERCC3, KDM5A, GTF2H1	11	0.023667	1.62586
DG	Upregulated	GOTERM_CC_DIRECT	GO:0030175~filopodium	ENAH, SHTN1, PTPRZ1, ERMN, UTRN, IQGAP2, KITLG, RDX, FGF13, ABI1, CXADR, RUFY3, PPP1R9A, DMD, MSN, CD302, SNAP25, LRRC7, LCP1, FGD4	20	0.0192806	1.71488
DG	Upregulated	GOTERM_CC_DIRECT	GO:0005643~nuclear pore	XPOT, ENY2, SENP2, RANBP17, TMEM33, XPO4, SNUPN, AHCTF1, KPNA5, KPNA4, RANBP2, NXF1, XPO7, TPR, KPNA3, KPNB1, KPNA1	17	0.0174881	1.75726
DG	Upregulated	GOTERM_CC_DIRECT	GO:0031965~nuclear membrane	NDUFB4, TMEM18, AHCTF1, TXLNG, WTAP, CEP70, SUMO1, RB1CC1, PAFAH1B1, PAK1, PUM2, RANBP2, TPR, PLCB1, TNPO1, AKIRIN1, KPNB1, DNAJC2, RASA1, GTF3C3, APC, ZFP354C, KLK6, GTPBP4, MYO6, OSBPL8, PTPN2, OSBPL6, SCAI, FAM188A, DGKH, FAM76B, CLIC1, PCM1, ANXA4, KLHDC2, NAT8F3, SENP2, SENP1, PTGDS, TSGA10, AKAP6, SPAST	43	0.0125826	1.90023
DG	Upregulated	GOTERM_CC_DIRECT	GO:0000922~spindle pole	RMDN2, NIN, CKAP5, RMDN1, CEP95, BIRC6, NEDD9, SPDL1, CEP128, TOPORS, CEP63, CEP44, LATS1, SMC3, SBDS, NEDD1, TUBGCP5, POC1B, IKBKG, VPS4B, VPS4A, RAB11A, CDK5RAP2, KIF2A, CALM1, NEK7	26	0.00801516	2.09609
DG	Upregulated	GOTERM_CC_FAT	GO:0005768~endosome	TGOLN2, RAB9A, ZC3HAV1, CHMP5, VPS50, TLR7, RAB1A, KIF13A, WDR72, PICALM, PIK3C3, VPS4B, RAB23, VPS4A, RAB27B, NMNAT2, VPS41, OPTN, TMEM106B, MAPK1, NPC1, CCR5, NBR1, ACAP2, FCHSD2, RAB14, CLIP1, ARL8B, RAB10, LRRK2, ANKFY1, VPS26A, HMGB1, CLCN3, SLC38A9, SNX6, CCDC93, SNX5, SNX7, SNX2, HFE, RABGAP1L, SNX4, RFFL, OCRL, RRAGD, ARFGEF2, CD74, CHMP2B, ABCA5, RRAGC, BLOC1S6, UBE2D3, STX12, BLOC1S2, O…	134	0.00608464	2.21576
DG	Upregulated	GOTERM_CC_FAT	GO:0005694~chromosome	RAD51D, HMGN3, PRPF4B, PPP2R5C, XRCC6, TIPINL1, INO80, CBX3, TBP, CBX1, REST, CBX5, SETX, PRIM1, TOP1, SIN3A, RAD21, KIFAP3, TARDBP, ORC4, EED, PSIP1, OGT, ORC2, PMS1, STAG2, STAG1, ORC3, ESCO1, RBL2, FMR1, HNRNPA2B1, GABPA, MECP2, TOPBP1, LIG4, PPP1CC, PPARGC1A, PPP1CB, DCLRE1C, SUZ12, DCLRE1A, NABP1, RFC1, SMARCE1, FBXO18, SMARCAL1, MCMBP, SMARCA5, SMARCA1, RNF20, SEPT7, ADD3, FBXO11, ANAPC16, …	176	0.00421295	2.37541
DG	Upregulated	GOTERM_CC_FAT	GO:0032838~cell projection cytoplasm	DYNC1LI2, KIF3A, GRIK2, HNRNPA2B1, MAP2K4, FMR1, AP3S1, SNAPIN, WLS, CANX, CDKL5, UHMK1, BLOC1S6, MAPK1, HIF1A, GRIA2, BLOC1S2, AP3M1, AKR1B1, MAPK8, PAFAH1B1, LRRK2, SPAST, AP3B1	24	0.00253874	2.59538
DG	Upregulated	GOTERM_CC_DIRECT	GO:0005802~trans-Golgi network	TGOLN2, PAM, VPS54, LRBA, CDH1, OCRL, ARFGEF2, ARFGEF1, PCSK1, GOLPH3L, GOLGA1, RAB11A, DOPEY1, RAB6A, CLVS2, GCNT1, SNAP25, KLHL20, NMNAT2, ADAM10, CNST, YIPF6, BIRC6, SCOC, WLS, OPTN, PCLO, GCC2, BICD1, PLEKHA8, ATP2C1, GOLPH3, RAB14, VAMP4, CPD, RAB38, LRRK2, RAB10, IFT88	39	0.00205563	2.68705
DG	Upregulated	GOTERM_CC_FAT	GO:1902554~serine/threonine protein kinase complex	PHKB, CCNT1, PHKA1, BCCIP, ACVR1C, MAP3K7, CCNE2, PRKAR2B, ERCC5, DAB2, RB1CC1, TBC1D5, CDK12, KDM5A, CCNA1, ERCC3, CHUK, TGFBR1, TAF7, SNW1, CCNC, CDK7, RB1, GTF2H1, MNAT1, IKBKG, PCNA, HSPD1	28	0.00139999	2.85387
DG	Upregulated	GOTERM_CC_FAT	GO:0061695~transferase complex, transferring phosphorus-containing groups	PHKB, CCNT1, CRCP, TBP, ACVR1C, MAP3K7, PRIM1, CCNE2, PRKAR2B, GTF2E2, DAB2, GTF2A1, INTS6, PIK3C3, CDK12, PIK3CA, KDM5A, TWISTNB, CCNA1, TBPL1, CHUK, MYO6, PIK3CB, PIK3C2A, MED14, CCNC, RB1, CDK7, GTF2H1, TAF13, REV3L, POLR2K, PHKA1, TAF9B, POLA1, BCCIP, CDC73, POLR2D, POLR2B, ERCC5, POLE3, RB1CC1, MYZAP, TBC1D5, LEO1, PRKAA1, CHD6, ERCC3, PIK3R1, POLR3G, POLR3F, TAF1, TGFBR1, TAF7, SNW1, POLR3C…	62	0.00139466	2.85553
DG	Upregulated	GOTERM_CC_DIRECT	GO:0070062~extracellular exosome	SLC9A3, RP2, PTGS1, NAA16, VPS50, ITSN2, B2M, CUL3, BHLHB9, VPS4B, PLS1, VPS4A, DHX36, CAB39, RAB27B, C4B, LIFR, COLEC12, CDHR5, SKP1, PCLO, ST13, MAPK1, SPAG9, NPC1, NPC2, F3, EIF2S1, ST14, MGAM, RYR2, ARL8B, ACADSB, WDR60, GSTCD, AHCTF1, ALCAM, ARG1, RPS28, KLKB1, CACYBP, EFR3A, FGL2, PTGR2, KIF3A, TAOK1, MAOB, GARS, ACACA, SERPINI1, SEPT11, RPE, SRSF7, CD300A, CDC42BPA, PCNA, TGFBR3, GK, HSPA1…	407	0.000670063	3.17388
DG	Upregulated	GOTERM_CC_DIRECT	GO:0000784~nuclear chromosome, telomeric region	RAD51D, NBN, XRCC6, HAT1, CBX3, PRKDC, CDC73, CBX1, POLR2B, CBX5, ORC4, ORC2, ORC3, SMCHD1, MSH2, TP53BP1, HMBOX1, BRCA2, SSB, WRN, PPP1CC, MCM4, PPP1CB, RAD50, DCLRE1C, ATRX, NABP1, DCLRE1A, PCNA, SLC25A16, PARP1, THOC2, THOC1	33	0.000641189	3.19301
DG	Upregulated	GOTERM_CC_FAT	GO:0099568~cytoplasmic region	DYNC1LI2, SEPT2, GRIK2, MLPH, CAPZA2, UTRN, AP3S1, FER, CANX, CTTNBP2, ACTR2, MKLN1, CTGF, PLS1, ITCH, ASPH, AP3B1, HNRNPA2B1, FMR1, ERMN, WLS, ARHGEF9, RIC8B, DCTN4, PCLO, NCL, CDKL5, MAPK1, HIF1A, STXBP6, PLEKHH2, GRM7, MAPK8, LRRK2, RAB10, ADD3, WDR43, SEPT7, SPAST, FGFR2, SHROOM4, CALD1, HFE, ANLN, RDX, CDH1, UHMK1, TPM4, BLOC1S6, BLOC1S2, AP3M1, MYZAP, PKD2, EXOC4, GPSM2, PAFAH1B1, EXOC6, EX…	78	0.000343891	3.46358
DG	Upregulated	GOTERM_CC_FAT	GO:0016604~nuclear body	SRSF1, BMI1, CREBRF, NBN, WTAP, MTFR2, PNN, CBX5, CASP8AP2, SRRM2, TARDBP, CDK12, NSMCE2, PLCB1, TGS1, KLHL20, SRP54A, FMR1, TOPBP1, PRPF3, CDC5L, TOPORS, RB1, PPP1CC, PPARGC1A, SARNP, SENP2, HIF1A, HIPK1, CPSF6, MDM2, SLU7, THOC1, USP7, SRSF10, BLM, NOC3L, ANGEL2, ZC3H8, NR2C1, SUMO2, SUMO1, DDX46, AGGF1, MORC3, TRIM69, NUDT21, NPAT, SKIL, EWSR1, ZC3H14, CSNK1A1, ZMYM2, GEMIN2, CSTF2, SMC5, YTHD…	76	0.000177998	3.74959
DG	Upregulated	GOTERM_CC_FAT	GO:0005794~Golgi apparatus	TGOLN2, SYT1, SYT4, SGMS2, VPS54, RP2, PTGS1, SGMS1, RAB1A, SLC35A3, B2M, KIF13A, CUL3, ACBD3, PICALM, CTGF, KIFAP3, COL4A3BP, DYNC2H1, RAB27B, GGTA1, GTPBP4, ROCK1, STRN3, UGCG, VPS41, SCYL3, OPTN, PCLO, GCC2, MAPK1, NPC1, ABCB1B, ATP2C1, TRAPPC8, ASCC3, RAB14, RAB10, CLCN3, MOB4, RFFL, KCNJ2, ARFGEF2, OCRL, ARFGEF1, CD74, GAD2, STX12, MACF1, GOLPH3L, KBTBD8, OLFM3, GCNT1, CNKSR2, ACER3, OSBPL9,…	238	0.000175661	3.75533
DG	Upregulated	GOTERM_CC_DIRECT	GO:0005814~centriole	BBS4, CEP120, RP2, CETN3, CCDC146, CEP128, OFD1, TTBK2, STARD9, CNTLN, SCLT1, CEP295, CCP110, KIF3A, CEP83, ROCK1, NIN, CEP135, AHI1, ALMS1, TOPORS, CEP63, PCM1, CENPJ, SASS6, NEDD1, POC1B, CEP162, BNIP2, PLA2G3, IFT88, MDM1	32	0.000133391	3.87487
DG	Upregulated	GOTERM_CC_DIRECT	GO:0014069~postsynaptic density	RTN4, GRIK1, CLSTN2, GRIK2, CPEB4, STRN, BNIP3, CPEB1, MAP3K7, PLCB4, PICALM, DAB1, ANK2, PAK1, LRRC7, DLG1, ADAM10, LYN, MPDZ, FMR1, GRIN2A, PCLO, CTNNA2, PJA2, EPB41L3, MIB1, AKAP5, ERC2, ADD3, DST, KALRN, YWHAZ, CALD1, BMPR2, ABI1, SORCS3, NETO1, MTMR2, MACF1, SORBS2, SOS1, SYN2, EXOC4, VPS35, CNKSR2, EPB41, MAP1B, NF1, NLGN1, LIN7C, GRIA3, GRIA4, DGKI, HOMER1, PPP1R9A, GRIA2, GSK3B, MAP2, SPT…	60	2.07645e-05	4.68268
DG	Upregulated	GOTERM_CC_DIRECT	GO:0036064~ciliary basal body	TAPT1, BBS4, BBS5, BBS7, TTC26, B9D1, RP2, DYNC2LI1, CETN3, AKAP9, DAAM1, OFD1, JADE1, TTBK2, KIFAP3, PKD2, CEP290, MKKS, SSX2IP, RPGR, BBOF1, RPGRIP1L, AHI1, ALMS1, TOPORS, PCM1, CENPJ, NME7, RTTN, TRAF3IP1, NEDD1, POC1B, LCA5, IFT57, IFT81, IFT88	36	1.66984e-05	4.77732
DG	Upregulated	GOTERM_CC_FAT	GO:0005681~spliceosomal complex	SRSF1, PRPF4B, CRNKL1, CWC15, SNRPD1, RBM5, SYNCRIP, PNN, CTNNBL1, SRRM2, LUC7L2, ZRSR1, PTBP2, ZRSR2, API5, LUC7L3, SNRPA1, RBM41, ZFP326, HNRNPA2B1, PRPF39, CDC5L, HNRNPU, SNRNP48, AQR, SLU7, SCAF8, PRPF38B, RBM25L1, SNRPB2, ZCRB1, HNRNPA3, SF3B1, AGGF1, FRG1, HNRNPF, HTATSF1, DHX15, WAC, PPWD1, PRPF40A, BCAS2, TXNL4B, GEMIN2, CWC27, SREK1, SNW1, DDX5, RBMX, HNRNPA1, GCFC2, SF3A3, SON, SYF2, GP…	59	4.82788e-08	7.31624
DG	Upregulated	GOTERM_CC_DIRECT	GO:0005813~centrosome	RAD51D, DYNC1LI2, ITSN2, CEP70, KIF13A, CCDC141, ODF2L, PRKAR2B, KIFAP3, VPS4B, VPS4A, CEP290, ORC2, CEP295, ROCK2, STK26, OLA1, TOPBP1, SKP1, RIC8B, PCM1, DCTN4, CDKL2, NME7, ELL2, MIB1, CEP162, CEP350, FGFR1OP, CLIP1, MDH1, IQCB1, CEP97, BBS4, BBS7, CCDC13, NEK1, CEP95, B9D1, SLF1, LRRCC1, CHEK1, CNTRL, BLOC1S2, LEO1, TBC1D31, DHX9, KIF3A, NIN, CKAP5, RPGRIP1L, BRCA2, ALMS1, WRN, CEP85L, CDC27,…	122	3.96374e-15	14.4019
DG	Upregulated	GOTERM_MF_FAT	GO:0003779~actin binding	CTNNAL1, TNNC2, SHTN1, MLPH, AIF1, IMPACT, CAPZA2, RP2, UTRN, IQGAP2, FER, HOOK1, ACTR2, PLS1, MSN, KLHL20, PLS3, KCNMA1, MYO6, CCDC88A, TRPM7, ERMN, CORO6, NEXN, CTNNA2, EPB41L2, EPB41L3, CCR5, PLEKHH2, LIMCH1, CFL2, AKAP5, OPHN1, TMSB4X, LRRK2, ADD3, DST, LCP1, MYO5A, SHROOM4, CALD1, SSFA2, SSH2, CACNB2, ANLN, RDX, DAAM1, TPM1, TPM4, BLOC1S6, MEFV, MACF1, FRG1, DMD, WIPF1, MYO5C, FGD4, SPATA32,…	68	0.0488399	1.31123
DG	Upregulated	GOTERM_MF_DIRECT	GO:0003924~GTPase activity	SEPT2, RAB3C, RAB9A, ATL2, ATL1, GTPBP10, MTIF2, RRAGD, BMS1, RAB1A, RRAGC, IGTP, KRAS, DDX3X, GFM1, RAB23, RAB11A, RALA, GUF1, RAB6A, GNL2, RAB27B, GNL3, RAB2A, EFL1, GTPBP4, DNM1L, OPA1, EIF2S3Y, TSR1, SRP54A, TRIM23, MFN1, GSPT1, GSPT2, RHOT1, RAB14, RAP1A, RAP1B, RIT2, RAB38, LRRK2, RAB10	43	0.0433375	1.36314
DG	Upregulated	GOTERM_MF_DIRECT	GO:0034237~protein kinase A regulatory subunit binding	PJA2, ACBD3, AKAP5, AKAP6, RYR2, AKAP9, AKAP11, ARFGEF2, ARFGEF1	9	0.0350226	1.45565
DG	Upregulated	GOTERM_MF_FAT	GO:0051018~protein kinase A binding	AKAP9, RDX, AKAP11, ARFGEF2, ARFGEF1, PKIA, PJA2, SPHKAP, ACBD3, PRKAR2B, GSK3B, AKAP5, AKAP6, RYR2, LRRK2	15	0.0295821	1.52897
DG	Upregulated	GOTERM_MF_FAT	GO:0008135~translation factor activity, RNA binding	CPEB2, CPEB4, BDP1, EIF2A, CPEB1, MTIF2, EIF3A, GFM1, EIF1, EIF3J, MRPL58, EIF3M, RPS24, EIF2S3Y, MTRF1L, DENR, EIF1A, ETF1, EIF4G2, EIF4E, GSPT1, EIF2S1, EIF4A2, EIF4A1, EIF5A2	25	0.0261454	1.5826
DG	Upregulated	GOTERM_MF_DIRECT	GO:0004702~receptor signaling protein serine/threonine kinase activity	TAOK1, STK10, TGFBR1, NEK1, STK26, MAP2K4, TAOK3, BMPR2, OXSR1, STK4, ACVR1C, PAK7, MAP4K5, SLK, PAK3, STK39, NEK4, BMPR1A	18	0.0213735	1.67012
DG	Upregulated	GOTERM_MF_FAT	GO:0003677~DNA binding	RAD51D, HMGN3, TMEM18, XRCC6, ZFP639, REST, PRIM1, SIN3A, TIGD2, DHX36, TBPL1, CCAR1, POLK, MTERF1, RCOR3, ZFP326, ZHX1, MECP2, LIG4, PPARGC1A, DCLRE1C, DCLRE1A, PRDM4, RFC1, TGIF1, ZZZ3, ST18, TFCP2L1, TAF9B, MYEF2, MYBL1, MYT1, POLN, IKZF5, PLAG1, ASXL3, KLF12, SUB1, TP53BP1, ESRRG, ZFP449, SMAD3, ZBTB44, UBP1, HNRNPA1, GCFC2, ZFHX4, DMTF1, PCNA, ZIK1, PARP1, TCF12, KAT6A, CREBRF, TCEANC, ELF1,…	295	0.009023	2.04465
DG	Upregulated	GOTERM_MF_FAT	GO:0019901~protein kinase binding	UTRN, PDE3B, IQGAP1, PRKAR2B, ANK2, STK39, SPRED1, DNAJC3, SYK, IBTK, KIF5B, BRAF, WNK1, GRIN2A, PPP1CC, PKIA, PPP1CB, MAPK1, SPAG9, HIF1A, MAPK6, CCR5, FGFR1OP, IGBP1, NBR1, AKAP5, DSP, MAPK9, RYR2, ADD3, PAM, MAPKAPK5, PFKFB2, CACNB2, RFFL, AKAP11, CACNB4, DUSP19, EIF3A, VRK2, ITGAV, FBXO5, TRAF6, PTPN2, TAOK1, MAP2K4, SMAD3, DOCK4, PCNA, CPNE3, PARP1, SRSF1, CCNT1, FER, CLTC, LATS1, BAG5, CCNE…	109	0.00867135	2.06191
DG	Upregulated	GOTERM_MF_FAT	GO:0042802~identical protein binding	SYT1, S100A6, SYT4, PTGS2, CADM2, SYT6, B2M, CUL3, HOOK1, PICALM, BHLHB9, VPS4B, CEP290, S100A1, AADAT, BRAF, VPS41, OPTN, GCC2, ST13, MAPK1, EIF2AK1, RYR2, EIF2AK3, HMGCS1, KCNJ2, DAAM1, ACAT1, CACYBP, RCHY1, TYROBP, CNKSR2, COL18A1, MAOB, SMAD3, SLAMF8, ARFIP1, HGF, HOMER1, FXR1, RPE, RABEP1, PCNA, CDC42BPA, PON2, RIDA, PARP1, TCF12, SCHIP1, GNPNAT1, BNIP3, ZBTB38, OFD1, HSF2, GOLGA5, USP15, GH…	217	0.0075934	2.11956
DG	Upregulated	GOTERM_MF_FAT	GO:0044389~ubiquitin-like protein ligase binding	GRIK2, BAG5, CUL3, PRKAR2B, CUL2, CUL5, KCNQ3, CASP8, RALA, CUL1, LYN, ERLIN2, ERLIN1, UBE2J2, RB1, HLTF, UBE2B, PPARGC1A, TANK, UBE2N, TRIM37, CCDC50, PA2G4, HIF1A, MDM2, SPOPL, USP25, RNF20, USP7, YWHAZ, SLF2, SLF1, UBE2V2, RFFL, RT1-BB, SUMO2, ARIH1, SUMO1, MOAP1, FBXW7, KBTBD4, DNAJA1, TRAF6, PIK3R1, HSPA9, TXNIP, DNM1L, SHPRH, TRIP4, TGFBR1, SMAD3, SMC6, NAE1, ATF6, ATXN3, GSK3B, IKBKG, GLMN…	62	0.00634424	2.19762
DG	Upregulated	GOTERM_MF_FAT	GO:0015631~tubulin binding	RAD51D, MLPH, TTLL4, INO80, FGF13, TTLL7, HOOK1, OFD1, KIF13A, SBDS, STARD9, CAMSAP2, CEP290, CDK5RAP2, TPR, KIF2A, OPA1, CCDC88A, LYN, KIF5B, KIF5A, KIF5C, FMR1, VPS41, KIF16B, PPARGC1A, EML4, FMN1, CEP350, KRIT1, CLIP1, IFT81, ARL8B, LRRK2, WDR43, DST, MDM1, SPAST, IFT74, BBS4, CETN3, GPHN, TUBGCP5, CEP57, MACF1, BLOC1S2, MZT1, RAB11A, CCSER2, PAFAH1B1, KIF21A, APC, DNM1L, KIF3A, MAP1B, NF1, BR…	63	0.0032236	2.49166
DG	Upregulated	GOTERM_MF_FAT	GO:0005543~phospholipid binding	SYT1, SYT4, IQGAP2, SYT6, IQGAP1, DAB2, PICALM, MCTP2, COL4A3BP, ZFYVE16, ATP8B1, OGT, NSMAF, PLCB1, SGK1, CCDC88A, SGK3, PIK3C2A, PRKCI, PSD3, KIF16B, PCLO, ARHGAP26, STXBP6, SBF2, KRIT1, F3, OPHN1, SNX13, ANKFY1, SNX19, HMGB1, BBS5, SNX6, SNX5, SNX14, SNX7, SNX16, SNX2, ASAP1, SNX4, EEA1, KCNJ2, DAPP1, RASGRP1, GOLPH3L, FCHO2, MYOF, NBEAL1, EPB41, SESTD1, OSBPL8, SNX27, SNX25, NF1, MAP1B, ARFIP…	73	0.00153026	2.81523
DG	Upregulated	GOTERM_MF_FAT	GO:0050839~cell adhesion molecule binding	RTN4, CAST, CTNNAL1, SEPT2, SHTN1, ZC3HAV1, CHMP5, CADM2, UTRN, EIF2A, FER, EDIL3, CXADR, CD2AP, IQGAP1, RAB1A, BZW1, DAB2, WISP1, SLK, CTGF, ANP32A, AFDN, MSN, AHNAK, DLG1, SYK, MYO6, LYN, KIF5B, PKN2, GRIN2A, OLA1, KTN1, CDHR5, NECTIN3, MPP7, CLIC1, CTNNA2, DHX29, STXBP6, NCK1, USO1, AKAP5, DSP, RAB10, DST, YWHAZ, USP8, SNX5, CALD1, SNX2, ASAP1, RDX, CDH1, ABI1, CHMP2B, MACF1, DDX3X, ATIC, TNR,…	82	0.000684889	3.16438
DG	Upregulated	GOTERM_MF_DIRECT	GO:0004674~protein serine/threonine kinase activity	CDK17, PRPF4B, TBK1, PHKB, RPS6KB1, CLK1, LATS1, ACVR1C, MAP3K7, PAK7, SLK, PAK3, CLK4, CDK12, PIK3CA, STK39, CAB39, PAK1, CHUK, AKT3, SYK, SRPK2, SGK1, ROCK1, BRAF, SGK3, TRPM7, ROCK2, STK26, PKN2, WNK1, PRKCI, WNK3, CDK7, DCAF1, CDKL3, CDKL2, STK4, GTF2H1, MAPK1, MAP4K5, EIF2AK1, HIPK1, MAPK6, RIOK3, MAPK9, MAPK8, CSNK1G3, EIF2AK2, NEK4, LRRK2, EIF2AK3, CAMK1D, NEK7, KALRN, NEK1, MAPKAPK5, STK1…	71	0.000556636	3.25443
DG	Upregulated	GOTERM_MF_DIRECT	GO:0008270~zinc ion binding	S100A6, APOBEC1, ZFP638, UTRN, RBM5, RNF214, NFXL1, RNF213, ZNRF2, KDM1B, G2E3, RNF141, TRIM44, ERAP1, RC3H2, LONRF3, ZFP326, GRIN2A, UBR3, UBR1, TRIM37, MIB1, TRIM36, UBR7, TRIM33, TRIM34, MTF2, NBR1, UBR5, RNF139, CLIP1, SLU7, ZZZ3, ST18, CPD, RNF20, TRIM39, FBXO11, ZFAND6, ZFAND5, PAM, ZCRB1, CXXC4, RFFL, MYT1, ZFAND1, TTC3, NR2C2, RABGGTB, NR2C1, ARIH1, TRIM69, DMD, RNFT1, CDADC1, OTUD7B, RNF…	188	0.00051115	3.29145
DG	Upregulated	GOTERM_MF_DIRECT	GO:0016874~ligase activity	HECW1, HECW2, XIAP, UBE3A, RFFL, GCLM, G2E3, RNF103, TRIM69, NSMCE1, WWP1, HECTD2, NSMCE2, RNF168, ITCH, NEDD4L, SUCLA2, TRAF6, TRIP12, HECTD1, RNF13, UBE4A, SUCLG2, HERC6, LIG4, MARCH7, HERC1, TRIM23, ATG3, PJA2, UFL1, UBR7, NEDD4, UBR5, MDM2, TRIM39	36	0.000233668	3.6314
DG	Upregulated	GOTERM_MF_FAT	GO:0008094~DNA-dependent ATPase activity	RAD51D, NBN, RBBP4, BLM, XRCC6, CDK7, WRN, MCM4, RAD50, GTF2H1, ATRX, RECQL, MNAT1, BPTF, DDX3X, RFC1, ASCC3, FBXO18, SMARCAL1, DHX36, TOP2B, SMARCA1, CHD6, SLC25A16, ERCC3	25	0.000206628	3.68481
DG	Upregulated	GOTERM_MF_FAT	GO:0043021~ribonucleoprotein complex binding	RNASEL, APOBEC1, CPEB2, RBM3, CPEB4, IMPACT, SNRPB2, NAA15, SNRPD1, NAA16, ERI1, EIF2A, CPEB1, MTIF2, UHMK1, SBDS, DDX3X, GUF1, ITCH, TOP2B, MRPL58, NMD3, EFL1, SRP54A, FMR1, OLA1, MTRF1L, RICTOR, DENR, EIF1A, HNRNPU, NVL, PPIH, DHX29, PTCD3, EIF2S1, SECISBP2L, EIF5A2	38	0.000101481	3.99362
DG	Upregulated	GOTERM_MF_FAT	GO:0004674~protein serine/threonine kinase activity	CDK17, PRPF4B, TBK1, PHKB, RPS6KB1, CLK1, LATS1, ACVR1C, MAP3K7, PAK7, SLK, PAK3, CLK4, CDK12, PIK3CA, STK39, CAB39, PAK1, CHUK, AKT3, SYK, SRPK2, SGK1, ROCK1, BRAF, SGK3, TRPM7, ROCK2, STK26, PKN2, WNK1, PRKCI, WNK3, CDK7, DCAF1, CDKL3, CDKL2, STK4, GTF2H1, MAPK1, MAP4K5, EIF2AK1, HIPK1, MAPK6, RIOK3, MAPK9, MAPK8, CSNK1G3, EIF2AK2, NEK4, LRRK2, EIF2AK3, CAMK1D, NEK7, KALRN, NEK1, MAPKAPK5, STK1…	91	6.23893e-05	4.20489
DG	Upregulated	GOTERM_MF_FAT	GO:0016874~ligase activity	HECW1, HECW2, XIAP, UBE3A, RFFL, GCLM, G2E3, RNF103, TRIM69, NSMCE1, WWP1, HECTD2, NSMCE2, RNF168, ITCH, NEDD4L, SUCLA2, TRAF6, TRIP12, HECTD1, RNF13, UBE4A, SUCLG2, HERC6, LIG4, MARCH7, HERC1, TRIM23, ATG3, PJA2, UFL1, UBR7, NEDD4, UBR5, MDM2, TRIM39	65	4.74609e-05	4.32366
DG	Upregulated	GOTERM_MF_FAT	GO:0019783~ubiquitin-like protein-specific protease activity	OTUD4, USP7, USP8, COPS5, USP9X, SENP5, SENP6, USP54, OTUD7B, USP37, USP16, USP34, USP15, USP33, USP32, USP14, MYSM1, VCPIP1, USP40, UFSP2, USP1, FAM76A, TANK, USP29, SENP2, USP28, ATXN3, SENP1, UCHL5, USP47, ZRANB1, USP46, UCHL3, USP25, USP24, USP45	36	3.16887e-06	5.4991
DG	Upregulated	GOTERM_MF_FAT	GO:0004386~helicase activity	SMARCAD1, NBN, ERCC6L2, BLM, XRCC6, INO80, DDX17, DDX46, DDX3X, DHX15, CHD2, DDX21, DHX36, DDX10, DDX20, CHD6, ERCC3, DDX42, DHX9, SHPRH, DDX3, YTHDC2, WRN, DDX5, MCM4, TTF2, RAD50, DDX6, ATRX, RECQL, DHX29, ASCC3, EIF4A2, FBXO18, EIF4A1, SMARCAL1, DDX50, DHX40, SLC25A16, DDX52	40	2.36895e-06	5.62544
DG	Upregulated	GOTERM_MF_FAT	GO:0051020~GTPase binding	RAB3GAP2, MLPH, XPO4, IQGAP2, BNIP3, FER, IQGAP1, STXBP5L, TBC1D15, DMXL2, EVI5, PAK3, RAPGEF6, VPS4A, AFDN, RAPGEF4, RANBP2, GOLGA5, DOCK11, KPNB1, GOLGA4, ERRFI1, ROCK1, BRAF, ROCK2, VPS41, KIF16B, OPTN, TBCK, CDKL5, BICD1, RAB11FIP2, STXBP6, STXBP5, IPO7, ACAP2, WDR44, LRRK2, ANKFY1, LCP1, MYO5A, RABGAP1, RABGAP1L, ABCA1, OCRL, RIMS2, DAAM1, RABGGTB, RASGRP3, AP3M1, RBSN, TBC1D5, CHM, EXOC4, E…	79	3.62893e-07	6.44022
DG	Upregulated	GOTERM_MF_DIRECT	GO:0000166~nucleotide binding	RP2, SYNCRIP, CLK1, NMRK1, MAP3K7, PIK3C3, CLK4, VPS4B, VPS4A, PIK3CA, PTBP3, DHX36, PTBP2, RAB27B, SYK, MAGI3, OPA1, BRAF, KIF5B, ROCK1, ROCK2, SRP54A, PIK3CB, KIF5A, KIF5C, MECP2, LIG4, SCYL3, NME7, ST13, MAPK1, EIF2AK1, MAPK6, DHX29, ASCC3, SCYL2, SMARCAL1, MAPK9, MAPK8, ARL8B, EIF2AK2, SCAF8, EIF2AK3, GATB, DNAH11, ACADSB, DNAH12, ZCRB1, NIFK, MYEF2, MTIF2, RPS24, DHX9, KIF3A, TAOK1, MAOA, TG…	86	1.64694e-08	7.78332
DG	Upregulated	GOTERM_MF_DIRECT	GO:0046872~metal ion binding	SC5D, SCN3A, PTGS2, AIF1, PTGS1, ITSN2, REST, NMRK1, MAP3K7, PLS1, PLS3, EFCAB10, BRAF, ROCK1, ROCK2, ZHX1, SCN2A, GRIN2A, CDHR5, COLEC12, ZUFSP, PCLO, NME7, OGFOD1, ZFP280C, ZFP280D, RYR3, RYR2, ZZZ3, ST18, SCN1A, MOB4, PPP2R3A, PCDH20, ZCRB1, ARIH1, ARG1, RPS27, RSL1, CDADC1, RCHY1, VEZF1, SEC23IP, ZC3H14, PTGR2, ZC3H15, KLF12, TGFBR1, ACACA, ATP11B, ESRRG, ATP11A, ATP11C, LACTB2, BFAR, CYP7B1,…	266	2.33976e-09	8.63083
DG	Upregulated	GOTERM_MF_FAT	GO:0019787~ubiquitin-like protein transferase activity	DZIP3, KLHL4, MED21, RNF213, ZNRF2, CUL3, CUL2, G2E3, KLHL5, CUL5, RNF141, KLHL9, WWP1, FBXO25, RC3H2, ITCH, CUL1, UBR3, UBE2J2, UBR1, SKP1, TRIM37, MIB1, TRIM36, UBR5, RNF139, FBXL4, RNF20, FBXO11, UBE2V2, RFFL, TTC3, ARIH1, ZFP451, FBXW7, UBE2D3, KBTBD2, KBTBD3, TRIM69, KBTBD8, HECTD2, RNF168, FBXO3, RCHY1, TRAF6, RNF14, HECTD1, RNF13, SHPRH, HACE1, ATG3, BFAR, UBE2E3, TRIM59, NEDD4, HECW1, HEC…	106	9.1511e-10	9.03853
DG	Upregulated	GOTERM_MF_FAT	GO:0046872~metal ion binding	SC5D, SCN3A, PTGS2, AIF1, PTGS1, ITSN2, REST, NMRK1, MAP3K7, PLS1, PLS3, EFCAB10, BRAF, ROCK1, ROCK2, ZHX1, SCN2A, GRIN2A, CDHR5, COLEC12, ZUFSP, PCLO, NME7, OGFOD1, ZFP280C, ZFP280D, RYR3, RYR2, ZZZ3, ST18, SCN1A, MOB4, PPP2R3A, PCDH20, ZCRB1, ARIH1, ARG1, RPS27, RSL1, CDADC1, RCHY1, VEZF1, SEC23IP, ZC3H14, PTGR2, ZC3H15, KLF12, TGFBR1, ACACA, ATP11B, ESRRG, ATP11A, ATP11C, LACTB2, BFAR, CYP7B1,…	596	1.06601e-11	10.9722
DG	Upregulated	GOTERM_MF_FAT	GO:1901363~heterocyclic compound binding	SYNCRIP, REST, MAP3K7, PIK3C3, VPS4B, PIK3CA, VPS4A, PTBP3, DHX36, PTBP2, RAB27B, TBPL1, CCAR1, BRAF, KIF5B, KIF5A, PIK3CB, SRP54A, KIF5C, MECP2, LIG4, SCYL3, MAPK1, AQR, EIF2AK1, DHX29, MAPK6, SCYL2, ASCC3, MAPK9, MAPK8, ARL8B, EIF2AK2, EIF2AK3, MCTS1, GATB, DNAH11, DNAH12, ZCRB1, MYBL1, RSL1, ZC3H14, ASXL3, DHX9, KIF3A, ZC3H15, TAOK1, PAIP2, PAIP1, TAOK3, ATP11B, ESRRG, GARS, ACACA, ATP11A, ATR…	986	1.58256e-29	28.8006
DG	Upregulated	GOTERM_MF_DIRECT	GO:0044822~poly(A) RNA binding	NAF1, FASTKD2, MRPL41, DZIP3, ZFP638, XRCC6, NAA15, SYNCRIP, PNISR, WDR75, DDX17, LUC7L2, DHX36, PTBP3, DDX10, PTBP2, MRPL32, LUC7L3, CCAR1, KRR1, MTERF1, GTPBP4, PAN3, SRP54A, ROCK2, ZFP326, MECP2, AQR, DHX29, PARP12, ASCC3, EIF2S1, EIF2AK2, TDRD3, FIP1L1, SRSF10, PCDH20, NOC3L, SRSF11, NIFK, ZCRB1, MYEF2, MTIF2, HNRNPA3, RPS27, RPS28, MACF1, FRG1, HTATSF1, BRIX1, SEC23IP, PRPF40A, RPS24, ZC3H14…	291	1.51237e-29	28.8203
DG	Upregulated	KEGG_PATHWAY	rno04662:B cell receptor signaling pathway	VAV3, LYN, PIK3CB, PPP3R1, MAPK1, KRAS, DAPP1, RASGRP3, FCGR2B, GSK3B, SOS1, IKBKG, PIK3CA, PPP3CC, CHUK, AKT3, PIK3R1, SYK	18	0.042132	1.37539
DG	Upregulated	KEGG_PATHWAY	rno03022:Basal transcription factors	TAF1, TAF7, TAF9B, TBP, GTF2H5, CDK7, GTF2H1, MNAT1, TAF13, GTF2E2, TAF15, GTF2A1, ERCC3, TBPL1	14	0.0367449	1.4348
DG	Upregulated	KEGG_PATHWAY	rno00640:Propanoate metabolism	MUT, SUCLG2, MCEE, EHHADH, ECHDC1, ACACA, HIBCH, SUCLA2, ACAT1, ACSS3, PCCA	11	0.0358596	1.44539
DG	Upregulated	KEGG_PATHWAY	rno04720:Long-term potentiation	BRAF, PPP3R1, GRIN2A, PPP1CC, PPP1CB, ITPR2, RPS6KA6, MAPK1, RPS6KA3, ATF4, PLCB4, KRAS, GRIA2, RAP1A, PPP3CC, RAP1B, PLCB1, CALM1	18	0.0348356	1.45798
DG	Upregulated	KEGG_PATHWAY	rno05212:Pancreatic cancer	BRAF, PIK3CB, ARHGEF6, TGFBR1, SMAD3, BRCA2, RB1, MAPK1, KRAS, IKBKG, MAPK9, PIK3CA, RALA, JAK1, MAPK8, PIK3R1, CHUK, AKT3	18	0.0324841	1.48833
DG	Upregulated	KEGG_PATHWAY	rno03040:Spliceosome	NCBP2, SRSF1, NCBP1, CRNKL1, SRSF10, TRA2B, CWC15, TRA2A, SNRPB2, U2SURP, SNRPD1, CTNNBL1, HNRNPA3, SF3B1, DDX46, TCERG1, LSM5, DHX15, DDX42, PRPF40A, BCAS2, SNRPA1, PRPF3, SNW1, CDC5L, DDX5, RBMX, HNRNPA1, HNRNPU, SF3A3, SRSF3, PPIH, AQR, SRSF7, SRSF6, SYF2, SLU7, THOC2, PRPF38B, THOC1, RBM25L1	41	6.38604e-06	5.19477
DG	Downregulated	GOTERM_BP_FAT	GO:0072583~clathrin-mediated endocytosis	UNC119, PACSIN1, AP2B1, HIP1R, SYT5, SYT11, TOR1A, DENND1A, DLL1, UBQLN2, CDK5, SCRIB, DNM1, GPR107	14	0.0490556	1.30931
DG	Downregulated	GOTERM_BP_FAT	GO:0014037~Schwann cell differentiation	EGR2, RELA, FA2H, SKI, CDK5, SIRT2, AKT1, LAMB2, NAB2, LGI4, POU3F2, GPC1, AKT2	13	0.0450777	1.34604
DG	Downregulated	GOTERM_BP_FAT	GO:0033605~positive regulation of catecholamine secretion	STX1A, ADORA2B, HTR6, PINK1, CARTPT, PLCD1, CHRNB2, GRK2, CXCL12	9	0.0450095	1.3467
DG	Downregulated	GOTERM_BP_FAT	GO:0016241~regulation of macroautophagy	LZTS1, TP53, PINK1, UBQLN2, AMBRA1, SESN2, EHMT2, ATP13A2, NPRL3, KDR, TBC1D25, MTM1, ULK1, RNF5, SQSTM1, ATG7, POLDIP2, MAPK3, TSC2, RALB, ATP6V0A1, QSOX1, RNF41, GBA	24	0.0376523	1.42421
DG	Downregulated	GOTERM_BP_FAT	GO:0001941~postsynaptic membrane organization	LRRC4, FZD9, HTR1A, NRXN2, DLG4, NLGN2, NLGN3, AGRN, DBN1, ETV5, SHANK3, LRP5, DVL1	13	0.035946	1.44435
DG	Downregulated	GOTERM_BP_FAT	GO:0035567~non-canonical Wnt signaling pathway	FZD9, FZD8, DVL3, NKD1, PTK7, FZD1, FZD2, FRZB, DVL1, SMO, WNT7B, WNT4, DACT1, CSNK1D, CSNK1E, SFRP2, ROR2, WNT7A	18	0.0339221	1.46952
DG	Downregulated	GOTERM_BP_FAT	GO:0051220~cytoplasmic sequestering of protein	GET4, AKT1, KDELR3, THRA, CREB3, NFKBIB, GRIK5, PINK1, HK1, PKD1, KEAP1, KDELR1	12	0.0311029	1.5072
DG	Downregulated	GOTERM_BP_FAT	GO:0030073~insulin secretion	MIDN, PPARD, CPLX1, GLUD1, NNAT, BRSK2, GPR68, SIDT2, VGF, KCNJ11, C2CD2L, NR1D1, GPR27, ATG7, RAB11B, CDK16, PSMD9, SREBF1, IRS2, PFKL, PTPRN2, PTBP1, SIRT4, NLGN2, PIM3, GPER1, BAD, PCK2, PTPRN, RPTOR, RAB11FIP5, MYRIP, CAPN10, DGAT1, UCP2, MC4R, PLA2G6, GHSR, AACS, ABCC8, LRP5	41	0.0310704	1.50765
DG	Downregulated	GOTERM_BP_FAT	GO:0016311~dephosphorylation	CTDSPL, PPP2R5A, NT5DC2, PTPN23, PINK1, TIMM50, PLPPR2, PLPPR3, WDR81, ADORA1, TGFB1, BAG4, PGP, CRY2, NT5M, CTDSP1, PHOSPHO1, CTDSP2, PPP4C, PPP1R14B, ZFYVE1, NUDT16, PPP1R37, SYMPK, PPP2R1A, PFKL, PTPRF, INPPL1, PTPRN2, PPP1R35, PDXP, PTPRS, CAMSAP3, PTPRO, FARP1, PPP1CA, MTMR14, LCK, PDGFRB, SEMA4D, PPM1M, PPP5C, CCDC8, ALPL, PHLPP1, PPP2R3B, ELL, ACP2, ENSA, G6PC3, PPP1R3E, DUSP18, MTM1, MTMR…	83	0.0302799	1.51885
DG	Downregulated	GOTERM_BP_FAT	GO:0048608~reproductive structure development	NOG, PDGFB, PDGFA, FST, JAG2, BAK1, WNT4, CUL7, WDR77, RARA, PATZ1, EIF2B4, TYRO3, BSG, RARG, RXRB, RXRA, IL11RA1, PTPRN, VASH1, BCL2L11, JUNB, TOX2, HES1, ASCL2, ADRM1, SERPINF1, ASB1, ROR2, PDGFRB, TFAP2C, HSD17B10, STK11, GRB2, SOX2, TFEB, BCL2L1, SOX9, SRC, LLGL2, DAZAP1, FBXW8, ATN1, LFNG, BMP4, CRIP1, EPAS1, PHB, FDPS, ADGRG1, KDR, CDKN1C, NOTCH1, SFRP2, H3F3B, GHSR, GRK2, TBC1D20, PPARD, D…	101	0.030091	1.52156
DG	Downregulated	GOTERM_BP_FAT	GO:0051259~protein oligomerization	KCNC1, KCNC4, OXA1L, KCNC3, SLC6A1, FGFRL1, NELL2, LNX2, MED24, IGHMBP2, SHKBP1, HMGCL, CUTA, KCND1, RXRA, SCUBE1, RXRG, BCL2L11, JUP, CLPP, COL1A2, AMFR, COL1A1, PPP5C, HSD17B10, ACHE, PANX2, STK11, GRB2, CRTC1, KEAP1, SRC, IVD, AGRN, ENTPD2, TMEM120A, SYT11, TMEM120B, GRIN1, AK3, EVL, SKI, KCTD2, KCTD5, SHANK3, KCTD10, P2RX4, NUP62, TSC2, CHRNB2, KCTD15, HR, KCNJ12, KCNIP2, BAG4, SHARPIN, BOK, …	99	0.0288074	1.5405
DG	Downregulated	GOTERM_BP_FAT	GO:0051017~actin filament bundle assembly	DMTN, LIMA1, TACR1, ELN, TGFB3, SRF, SRC, BAG4, PFN1, SORBS3, WNT4, S1PR1, PFN3, ZYX, ARHGEF10L, SYNPO, PIK3R2, DBNL, LIMK1, BAIAP2, FSCN1, PDXP, DPYSL3, SYNPO2, EVL, SHANK1, SHANK3, CORO1B, ID1, SERPINF2, RGCC, DBN1, ADD2, ADD1	34	0.0255705	1.59226
DG	Downregulated	GOTERM_BP_FAT	GO:0045921~positive regulation of exocytosis	SEPT5, RAB3A, PLD2, RAB2B, STX1A, CDK5R2, RAB3D, ADORA2B, SYT10, ATP6AP1, CACNA1I, NCS1, SYT9, ATP13A2, CDK5, CRHR1, LAMP1, CACNA1G, HGS, PLA2G6, CACNA1H, RAB15, SMPD3, SCAMP5	24	0.025561	1.59242
DG	Downregulated	GOTERM_BP_FAT	GO:0061037~negative regulation of cartilage development	BMP4, CHADL, ADAMTS7, NOG, RARG, LTBP3, RARA, WNT9A, GLI2, SOX9, FRZB	11	0.0248135	1.60531
DG	Downregulated	GOTERM_BP_FAT	GO:0008038~neuron recognition	MEGF8, CDK5R1, NDN, EFNB3, DSCAML1, EPHB3, EPHB2, FEZF2, DYNLL2, CXCR4, FOXG1, GAP43, DSCAM	13	0.0225914	1.64606
DG	Downregulated	GOTERM_BP_FAT	GO:0036503~ERAD pathway	NPLOC4, HM13, SYVN1, UBE2G2, FBXO2, FOXRED2, RNF185, MAN1B1, BRSK2, UBQLN2, TMEM259, STUB1, SGTA, GET4, TMEM129, USP19, BAG6, RNF5, PSMC3, POMT1, TOR1A, TMUB1, AMFR, AUP1	24	0.0222287	1.65309
DG	Downregulated	GOTERM_BP_FAT	GO:0006665~sphingolipid metabolic process	CERS5, FAM57B, ST6GALNAC5, ELOVL1, ST6GALNAC6, ST3GAL2, ST3GAL5, CERS1, HTRA2, CERS2, ATG7, CERK, AGK, GAL3ST1, GBA, A3GALT2, B4GALNT1, SPNS2, PLA2G15, SPHK2, PSAP, BAX, SMPD1, PLA2G6, NEU1, CLN8, SMPD3, DEGS2, NEU4, CLN6	30	0.0218404	1.66074
DG	Downregulated	GOTERM_BP_FAT	GO:0014014~negative regulation of gliogenesis	BMP4, NOG, SOX11, SKI, MBD1, SIRT2, GPR37L1, MYCN, ASCL2, HES1, ATF5, LINGO1, NOTCH1, HES5, CERS2, IDH2	16	0.0213272	1.67107
DG	Downregulated	GOTERM_BP_FAT	GO:0003007~heart morphogenesis	NOG, FGFRL1, TGFB3, LEMD2, TGFB1, S1PR1, SMARCD3, SEMA3C, RARA, SOX17, SOX11, RXRA, TP53, DLL1, HES1, SMO, MSX1, ZMIZ1, JUN, GAA, ZFPM1, ADAM15, MEGF8, WNT16, COL2A1, EGLN1, SOX9, EPHB4, SRF, DCHS1, LY6E, FOLR1, AXIN2, NFATC1, BMP4, DVL3, SMAD7, FZD1, SIRT6, TEAD2, TBX1, FZD2, TAB1, PPP1R13L, SNAI1, NOTCH1, SFRP2, GSK3A, PTCD2, HEYL, PTCH1, ENG, NCOR2	53	0.0194706	1.71062
DG	Downregulated	GOTERM_BP_FAT	GO:0021543~pallium development	PHLPP1, FGFR1, NOG, CDK5R1, CDK5R2, SOX2, COL3A1, BCAN, DMRTA2, BCL2L1, XRCC1, XAB2, MDK, SRF, SLC32A1, ARX, ATAT1, BCL2, LHX2, ATG7, DCLK2, H2AFX, POU3F2, RARA, EIF2B4, KIRREL3, NR2F1, DAB2IP, EMX1, MDGA1, GRIN1, PTPRS, NR4A3, BAD, CDK5, ADGRG1, ASCL1, FEZF2, SMO, BTG2, TRAPPC9, BAX, FOXG1, HTR6, PEBP1, TFAP2C, KDM6B	47	0.0184867	1.73314
DG	Downregulated	GOTERM_BP_FAT	GO:0071496~cellular response to external stimulus	PDGFB, TGFB1, AKT1, BAK1, MAX, FOS, WNT4, AES, MAP1LC3A, BAG3, ATG7, RALB, NOS3, ZFYVE1, EGR1, LTBR, TP53, RPTOR, CHMP1A, JUN, MAPK3, CARTPT, COL1A1, KIF26A, SLC38A3, ADORA2B, TNC, COL2A1, GCN1L1, SOX9, NPRL3, SRF, HNRNPL, CYP27B1, FOLR1, BCL2, AGT, CNN2, ARHGDIA, GBA, BMP4, SREBF1, PDK2, TBL2, KLF10, FSCN1, FZD1, AXL, IGF2, ATP1A1, AMBRA1, FZD2, BAD, EHMT2, USF1, SIRT2, USF2, GAS6, KCNK4, SREBF2…	68	0.018248	1.73878
DG	Downregulated	GOTERM_BP_FAT	GO:2000463~positive regulation of excitatory postsynaptic potential	PRKCZ, STX1A, GRIN1, DLG4, NLGN2, NLGN3, CUX2, SHANK1, DBN1, WNT7A, SHANK3, DVL1	12	0.0182326	1.73915
DG	Downregulated	GOTERM_BP_FAT	GO:0048168~regulation of neuronal synaptic plasticity	EGR1, PPFIA3, RAB3A, JPH3, SLC8A2, EGR2, NCDN, GRIN1, BCAN, SYNGR1, VGF, SHANK3, EPHB2, KDR, SYP, PLK3, AGT, DLG4, NSMF, CAMK2B, SYNGAP1, NEURL1	22	0.0163797	1.78569
DG	Downregulated	GOTERM_BP_FAT	GO:0070647~protein modification by small protein conjugation or removal	MAEA, CBX4, MED24, RNF216, OTUB2, USP51, KLHL8, CUL7, WWP2, ATG7, CUL9, BTBD2, RBCK1, CYHR1, RNF31, ANAPC2, ANAPC5, SOCS1, MTA1, BTBD6, HMG20B, OTUD1, KDM2B, PIAS4, MIB2, ASB1, AMFR, NEURL2, KBTBD11, FBXO10, ASB6, NEURL1, FZR1, SYVN1, UBE2V1, RAB40C, COPS7A, HSPA1A, DMWD, KEAP1, ANAPC11, CDC34, UBE2QL1, UBAC1, TMEM129, FBXW8, FBXW5, KBTBD6, RNF167, TRAF7, UBE2D1, TRAF4, UNKL, TRAF3, FBXO7, MOCS3,…		0.0160222	1.79528
DG	Downregulated	GOTERM_BP_FAT	GO:0010821~regulation of mitochondrion organization	CYB5R1, U2AF2, HPS4, PINK1, BAP1, HSPA1A, BCL2L1, AKT1, HSPA1L, BAG4, BAK1, MPV17L2, HTRA2, BOK, GPR26, ATG7, SLC35F6, PSMD8, RNF31, INF2, KAT2A, SREBF1, MIEF2, MIEF1, ZDHHC8, LMNA, TP53, SIRT4, MUL1, MRGPRE, GPER1, AMBRA1, BAD, ATP13A2, BCL2L11, KDR, SREBF2, HES1, PRELID1, GSK3A, KCNN3, BAX, SIAH3, PLA2G6, WDR46, RNF41, HDAC6	47	0.0153672	1.81341
DG	Downregulated	GOTERM_BP_FAT	GO:0007613~memory	PRKCZ, ABCA7, NOG, JPH3, CRTC1, TACR1, GLUD1, SRF, MDK, FOXO6, PAK6, EIF4EBP2, HRH3, CHST10, EGR1, SLC8A2, B4GALT2, GRIN1, ATP1A3, PCDH8, IGF2, ASIC1, EHMT2, SHANK1, SHANK3, RGS14, KCNK4, SLC17A7, CRHR1, ADRB1, SERPINF1, PLA2G6, CHRNB2, CUX2	34	0.0147295	1.83181
DG	Downregulated	GOTERM_BP_FAT	GO:0009612~response to mechanical stimulus	KCNC1, PDGFB, TACR1, GLI2, CXCL12, TGFB1, AKT1, BAK1, FOS, CXCR4, BAG3, GRIN2D, PHF24, NOS3, ABHD12, EGR1, LTBR, NRXN2, ACTA1, RELA, MMP14, JUNB, JUP, LHFPL5, BTG2, JUN, LCK, MAPK3, HSPB1, COL1A1, TNC, SOX2, COL3A1, COL2A1, HSPA1A, SOX9, SRC, ECE1, AGT, JUND, PKD1, CNN2, ENTPD2, ARHGDIA, ACTB, BMP4, ASIC2, LMNA, IGF2, ATP1A1, BAD, SHANK3, KCNK4, GPI, KCNJ4, FYN, MAPK14, PTCH1, IGFBP2, CLCN6, ENG,…	62	0.0140507	1.8523
DG	Downregulated	GOTERM_BP_FAT	GO:0032964~collagen biosynthetic process	BMP4, PPARD, ADORA2B, PDGFB, TGFB3, SERPINH1, TGFB1, WNT4, SERPINF2, RGCC, CREB3L1, PDGFRB, CYGB, COL1A1, ENG, F2R	16	0.0139679	1.85487
DG	Downregulated	GOTERM_BP_FAT	GO:0006865~amino acid transport	SLC38A5, SLC38A3, SLC6A1, SLC6A20, SLC38A7, GABBR1, SLC7A4, SLC7A5, SLC1A4, SLC32A1, HRH3, SLC1A6, SLC25A22, SLC43A2, SLC6A11, SLC6A13, SLC3A2, SLC7A10, SLC6A17, SLC17A7, GRM4, SLC6A9, SLC7A1, HTR6, SLC13A3, SLC15A4, CLN8, CACNA1A	28	0.0121599	1.91507
DG	Downregulated	GOTERM_BP_FAT	GO:0035924~cellular response to vascular endothelial growth factor stimulus	EGR3, DAB2IP, MYO1C, FLT4, DLL1, GAS1, MAPKAPK2, KDR, AKT1, NOTCH1, MAPK14, HSPB1, PDGFRB, ADGRA2, TCF4	15	0.0120519	1.91895
DG	Downregulated	GOTERM_BP_FAT	GO:0007215~glutamate receptor signaling pathway	CDK5R1, GNAI2, CACNG8, CACNG7, GRIK4, GRIN1, GRIK5, ATP1A3, CACNG4, NLGN2, NLGN3, CACNG2, SHANK1, SHANK3, GRM4, GRM2, CNIH2, FYN, GRIN2C, GRIN2D, MAPK8IP2, DLG4, GRID1	23	0.0102805	1.98799
DG	Downregulated	GOTERM_BP_FAT	GO:0043583~ear development	NOG, PDGFA, IGFBP7, EFNA2, TGFB3, JAG2, SOBP, GLI2, TGFB1, SPRY2, OSR1, OTX1, DLL1, SLC9A3R1, SLC9A3R2, BCL2L11, MYCN, HES1, DDR1, LHFPL5, MSX1, HES5, LRP10, FOXG1, MAPK3, ROR2, PDGFRB, FGFR1, SOX2, PTK7, LRIG1, COL2A1, MAPKAPK2, SOX9, SCRIB, DCHS1, EPHB2, C1QTNF5, ECE1, BCL2, POU3F4, BMP4, MAF, DVL3, CCM2, TBX1, NR4A3, FZD2, GAS1, FRZB, WHRN, DVL1, NOTCH1, HPCA	54	0.0102495	1.9893
DG	Downregulated	GOTERM_BP_FAT	GO:0072359~circulatory system development	NOG, PDGFB, PDGFA, LMO4, FGFRL1, TGFB3, PDLIM3, LEMD2, CSPG4, CXCL12, TGFB1, BAK1, SHB, WNT4, PSKH1, S1PR1, SMARCD3, ATG7, RRAS, RARA, RAPGEF1, ADGRB2, DAB2IP, RXRB, RXRA, PTBP1, UBIAD1, RXRG, DLL1, MFGE8, VASH1, JUNB, PNPLA6, VEGFB, HES1, MSX1, SERPINF1, SERPINF2, JUN, MAPK3, RGCC, COL1A2, NEK8, PDGFRB, HSPB1, MAPK7, COL1A1, ADGRA2, SLITRK5, ADD1, FGFR1, ADORA2B, TNFRSF12A, STK11, ELN, PTK7, CX3…	182	0.0101918	1.99175
DG	Downregulated	GOTERM_BP_FAT	GO:0051954~positive regulation of amine transport	SLC38A3, RAB3B, STX1A, SLC6A1, ADORA2B, ADORA2A, PINK1, CXCL12, HTR6, CARTPT, CHRNB2, PLCD1, GRK2, NAT8L	14	0.00981099	2.00829
DG	Downregulated	GOTERM_BP_FAT	GO:0038179~neurotrophin signaling pathway	PPP2R5B, PTPRF, NDN, PPP2R5D, BCAR1, SRC, SPRY2, SPRY1, CORO1A, AKT1S1, ZFYVE27, AGT, RAPGEF1, HAP1	14	0.00981099	2.00829
DG	Downregulated	GOTERM_BP_FAT	GO:0048013~ephrin receptor signaling pathway	GIT1, ANKS1A, CDK5R1, EFNB3, EFNA2, EFNB1, EFNA3, EPHA10, EPHB3, EPHB4, EPHB1, EPHB2, NCK2, EPHB6, EPHA8	15	0.00930013	2.03151
DG	Downregulated	GOTERM_BP_FAT	GO:0006024~glycosaminoglycan biosynthetic process	EXTL3, NDST1, PDGFB, CHST5, EXTL1, TGFB1, B3GAT1, B3GAT3, XYLT2, CHST7, CCND3, CHPF, AP2A1, CHST12, PDGFRB, PXYLP1, EXT2	17	0.00793185	2.10063
DG	Downregulated	GOTERM_BP_FAT	GO:0038034~signal transduction in absence of ligand	PPP2R1A, MKNK2, MKNK1, HSPA1A, PRDX2, COL2A1, CX3CL1, GAS1, BCL2L1, BAD, DAPK3, BCL2L11, BAK1, PPP1CA, HTRA2, UNC5B, FYN, BOK, GSK3A, BCL2, BAX, BAG3, MAPK7, AGAP2	24	0.00741484	2.1299
DG	Downregulated	GOTERM_BP_FAT	GO:0061061~muscle structure development	NOG, THRA, PDGFB, FGFRL1, LEMD2, PDLIM3, EIF5A, CXCL12, TGFB1, DMPK, MAMSTR, WNT4, S1PR1, SMARCD3, ATG7, ZFP689, RARA, RBFOX1, WNT10B, RXRB, RXRA, PTBP1, RXRG, STIM1, DLL1, HMG20B, EEF2, HES1, MSX1, HSPB2, PDGFRB, BIN1, NEURL2, NEURL1, FGFR1, ELN, CNTFR, SOX9, SRF, EMD, UNC45A, BMP4, EPAS1, SMAD7, AK3, FDPS, SKI, SELENON, ZBTB42, HDAC5, NOTCH1, PTCD2, DYRK1B, ITGA7, H3F3B, ENG, SLC9A1, PPARD, YBX…	120	0.00698096	2.15608
DG	Downregulated	GOTERM_BP_FAT	GO:2001233~regulation of apoptotic signaling pathway	STEAP3, NOG, ZFP385A, YBX3, TMEM161A, PINK1, PRDX2, TNFSF12, CXCL12, MAGED1, AKT1, BAK1, WNT4, HTRA2, UNC5B, GSN, BOK, CREB3L1, RBCK1, MKL1, AGAP2, DEDD2, PPP2R1A, DAB2IP, HYAL2, LTBR, RELA, ERP29, TP53, GPER1, SLC9A3R1, DAPK3, BCL2L11, NCK2, PPP1CA, MSX1, PIAS4, LCK, MNT, PLA2G6, HSPB1, UBB, MAPK7, SIAH2, FAIM2, FGFR1, SYVN1, TNFRSF12A, ADORA2A, HSPA1A, COL2A1, BCL2L1, CX3CL1, ITM2C, SRC, RACK1,…	80	0.00687084	2.16299
DG	Downregulated	GOTERM_BP_FAT	GO:0060074~synapse maturation	ANAPC2, PALM, SEZ6L2, DAB2IP, NEUROD2, CAMK2B, ADGRL1, SEZ6L, SHANK1, SEZ6, NEURL1	11	0.00629799	2.2008
DG	Downregulated	GOTERM_BP_FAT	GO:0008285~negative regulation of cell proliferation	NOG, CHERP, FGFRL1, TGFB3, MED25, ADORA1, TGFB1, MAGED1, FNTB, BAK1, CDKN2C, WDR77, RARA, ZFP503, RAPGEF1, DAB2IP, WNT10B, RARG, PTPRF, PLXNB1, RXRA, SIX5, DLL1, PIM2, WNK2, VASH1, HES1, ASCL2, TRIM35, SSTR2, KDM2B, MSX1, SERPINF1, JUN, RGCC, VSIR, ROR2, WFDC1, NEURL1, PPP2R3B, ADORA2B, ADORA2A, STK11, SOX2, PTH1R, SOX9, TIMP2, SRF, FUZ, CERS2, IDH2, AXIN2, EMD, BMP4, TAF6, PHB, WDR6, FBXO2, SKI,…	124	0.00423123	2.37353
DG	Downregulated	GOTERM_BP_FAT	GO:0007264~small GTPase mediated signal transduction	RASGEF1B, RRAD, DIRAS1, DIRAS3, GBF1, MFHAS1, RALB, RRAS, RAPGEF1, DBNL, DAB2IP, STMN3, PSD2, FARP1, RND1, SGSM3, JUN, COL1A2, RAB15, PDGFRB, ARL8A, SPATA13, RAB7B, ARHGEF25, GRB2, ADCYAP1R1, RAB40C, ARF6, ARF5, TIMP2, SRC, RASAL1, CDC42EP1, RAC3, CDC42EP4, CDC42EP3, ARHGEF10L, IQSEC1, ARHGDIA, IQSEC2, GIT1, DENND1A, ICMT, ADGRG1, NUP62, ULK1, RHOT2, SYNGAP1, RAB5C, WASF1, PREX1, SPRY2, SPRY1, NI…	103	0.00405562	2.39194
DG	Downregulated	GOTERM_BP_FAT	GO:0001667~ameboidal-type cell migration	DMTN, PPARD, PDGFB, TACR1, BCAR1, PTPN23, CXCL12, TGFB1, ZFP580, AKT1, ACVR1B, BAG4, SEMA3G, CXCR4, SEMA7A, SEMA3C, RHOB, SOX18, NOS3, CYGB, SOX17, SOX10, DAB2IP, EGR3, HYAL2, TMEM201, ARHGEF7, EFNB1, PKN1, ADIPOR1, VASH1, SMO, SERPINF1, SEMA4G, SEMA4F, JUN, RGCC, SEMA4C, HSPB1, SEMA4B, SEMA4D, ADGRA2, SEMA4A, MEGF8, FGFR1, NANOS1, ITGB4, GIPC1, SOX9, SRF, EPHB4, SRC, PFN1, FOLR1, AGT, PLEKHG5, S…	73	0.00368368	2.43372
DG	Downregulated	GOTERM_BP_FAT	GO:0060348~bone development	ALPL, MEGF8, ZFP385A, PDGFA, LTBP3, ATP6AP1, FAM20C, TGFB3, SLC38A10, COL2A1, GPR68, SOX9, SERPINH1, SRF, MIGA2, DCHS1, TGFB1, SRC, COMP, TRIM45, PHOSPHO1, NOS3, RARA, AXIN2, THBS3, BMP4, SPNS2, RARG, INPPL1, PLXNB1, SKI, MMP14, POR, CTC1, MEF2D, MSX1, PPIB, SFRP2, NAB2, DYM, NPPC, GNAS, ZFPM1, SEMA4D, COL1A1, CARM1, ENG, CBS, LRP5	49	0.00344041	2.46339
DG	Downregulated	GOTERM_BP_FAT	GO:0032526~response to retinoic acid	PDGFA, IGFBP7, TNC, SOX2, ELN, PTK7, TMEM161A, COL2A1, SOX9, BRINP2, HTRA2, OSR1, RARA, TIE1, PHC1, BMP4, MUC1, SREBF1, SCAMP3, RARG, TWF2, RXRB, RXRA, RXRG, TP53, TBX1, TEAD2, SLC10A3, ASCL1, ADNP2, WNT7B, SERPINF1, COL1A2, PDGFRB, PTCH1, COL1A1, IGFBP2, ADD1	38	0.00327645	2.4846
DG	Downregulated	GOTERM_BP_FAT	GO:0019318~hexose metabolic process	PGAM1, MRFAP1, KCNJ11, GLB1, AKT1, PKM, PGP, NISCH, CHST15, SIK1, AKT2, SCAMP3, IRS2, INPPL1, TP53, PMM1, CHST1, MAN2A2, PPP1CA, DGAT2, PGM1, MIDN, STK11, HK1, SESN2, SRC, G6PC3, PPP1R3E, GALK1, NR1D1, PPP1R3G, ENO2, GALE, KAT2A, PDK2, WDTC1, IGF2, BAD, PCK2, BRAT1, USF1, CPT1A, KHK, GPI, MAN2C1, MPI, MAPK14, CACNA1A, IGFBP5, LRP5, PC	51	0.0031118	2.50699
DG	Downregulated	GOTERM_BP_FAT	GO:0008593~regulation of Notch signaling pathway	RITA1, MFNG, PEAR1, EGFL7, DTX1, SOX2, JAG2, DLK2, DLL1, GDPD5, RFNG, MMP14, TSPAN17, LLGL1, LLGL2, HES1, SLC35C2, SLC35C1, ASCL1, NOTCH1, HES5, NRARP, LFNG, NEURL1	24	0.00238583	2.62236
DG	Downregulated	GOTERM_BP_FAT	GO:0008593~regulation of Notch signaling pathway	RITA1, MFNG, PEAR1, EGFL7, DTX1, SOX2, JAG2, DLK2, DLL1, GDPD5, RFNG, MMP14, TSPAN17, LLGL1, LLGL2, HES1, SLC35C2, SLC35C1, ASCL1, NOTCH1, HES5, NRARP, LFNG, NEURL1	24	0.00238583	2.62236
DG	Downregulated	GOTERM_BP_FAT	GO:0051051~negative regulation of transport	THRA, SRCIN1, PNKD, FST, STOML1, RANGAP1, UBQLN2, ADORA1, TGFB1, GSTM2, PACSIN1, CRY2, WWP2, ATG7, SCAMP5, IRS2, DAB2IP, ERP29, PKIG, PIM3, RPTOR, CRHR1, HES1, HTR6, RGCC, CARTPT, MAPK7, NFKBIB, KEAP1, HSPA1A, CX3CL1, NR1H2, OAZ1, IDH2, AGRN, AXIN2, SLC35F6, EMD, SREBF1, UNC119, SYT11, RHBDF1, GAS6, SREBF2, NOTCH1, CORO1A, CNIH2, UCP2, GRK6, GHSR, DMTN, UBE2G2, GABBR1, KCNJ11, AKT1, BAG4, TRIM9, …	103	0.0022327	2.65117
DG	Downregulated	GOTERM_BP_FAT	GO:0034976~response to endoplasmic reticulum stress	HM13, UBE2G2, RNF185, MAN1B1, PDIA6, UBQLN2, GET4, BAK1, USP19, BAG6, BOK, POMT1, ATF6B, TMUB1, CREB3L1, SCAMP5, AUP1, DAB2IP, FLOT1, ERP29, TP53, EEF2, BCL2L11, PARP16, NCK2, CCND1, JUN, TXNDC5, PLA2G6, AMFR, SYVN1, BRSK2, HSPA1A, SESN2, TMEM259, STUB1, TMEM129, BCL2, TOR1A, PIK3R2, P4HB, NPLOC4, TBL2, CREB3, TMBIM6, FBXO2, FOXRED2, SGTA, HYOU1, PSMC3, RNF5, GRINA, BAX	53	0.00182388	2.739
DG	Downregulated	GOTERM_BP_FAT	GO:0072657~protein localization to membrane	DMTN, OXA1L, HPS6, PPP2R5A, ADCY6, GRIK5, ADORA1, TGFB1, GET4, AKT1, BAG4, WNT4, PACSIN1, BAG6, HTR1A, DLG4, COX18, CSK, DPP6, AKT2, LRRC4, RAMP3, BSG, STX1A, NRXN2, TTC7A, MIEF2, MIEF1, FLOT2, TTC7B, FLOT1, ARHGEF16, PKDCC, GPER1, SLC9A3R1, MYADM, CDK5, TMEM150A, JUP, ATG4D, ZFYVE27, PEX26, RANGRF, CLIP3, VAMP2, PRKCZ, PALM, CDK5R1, SAMM50, CACNB1, ARF6, CACNB3, BCL2L1, DCHS1, RACK1, PEX16, RAB1…	85	0.00181656	2.74075
DG	Downregulated	GOTERM_BP_FAT	GO:0051726~regulation of cell cycle	PDGFB, PPP2R5B, CTDSPL, MED25, AURKB, INTS3, TGFB1, FNTB, BAK1, SHB, WNT4, BRINP2, CUL7, GBF1, SMARCD3, CDKN2C, CUL9, H2AFY, CTDSP1, CTDSP2, RARA, NUDT16, WNT10B, DAB2IP, PCID2, PDXP, PIM3, PIM2, BCL2L11, JUNB, HES1, ASCL1, TRIM35, MSX1, RCC2, SGSM3, JUN, RGCC, FOXG1, MNT, PDGFRB, BIN1, CCDC8, FGFR1, PPP2R3B, FZR1, CDK5R1, STK11, SOX2, GIPC1, BCL2L1, ANAPC11, BOP1, TIMP2, SOX9, SRC, CDC37, SCRIB,…	156	0.00161491	2.79185
DG	Downregulated	GOTERM_BP_FAT	GO:0021953~central nervous system neuron differentiation	FGFR1, LMO4, ZFP335, NANOS1, SOX2, NF1X, SZT2, GLI2, EPHB3, EPHB1, EPHB2, ARX, IGHMBP2, LINGO1, RAC3, ATG7, BCL11B, POU3F4, DCLK2, TSKU, SAMD4B, PHLDA1, EMX1, MDGA1, DRAXIN, DMRT3, SPTBN4, GDPD5, CDK5, TBR1, SHANK3, SLIT3, HES1, PRDM8, ASCL1, SMO, ATF5, FEZF2, BTG2, HES5, ULK1, FOXG1, CHRNB2, PTCH1, UBB, TFAP2C, CLN8, WNT7A, CACNA1A, FAIM2	50	0.00133134	2.87571
DG	Downregulated	GOTERM_BP_FAT	GO:0009894~regulation of catabolic process	EIF6, THRA, PGAM1, TNFSF12, UBQLN2, ADORA1, GRIN2C, ATG7, DHX34, GTPBP1, WNT10B, IRS2, DAB2IP, RELA, PPP1CA, SGSM3, FZR1, RAD23A, GIPC1, SOX9, TIMP2, PPP1R3E, OAZ1, LPCAT1, SCARB1, PABPC1, SMAD7, PHB, RHBDF1, OSBPL7, ATP13A2, FURIN, DVL1, HSPBP1, PLK3, PSMC3, MLYCD, PLK1, SMURF1, DEDD, UBE2G2, BSCL2, RGP1, CBFA2T3, AKT1, USP19, BAG6, HSF1, PSMD3, DDA1, SOX17, AGAP2, AKT2, ZFP36, ANKS1A, TP53, PRK…	97	0.00132344	2.87829
DG	Downregulated	GOTERM_BP_FAT	GO:0019216~regulation of lipid metabolic process	EIF6, SLC27A1, THRA, PDGFB, PPP2R5A, PDGFA, IGFBP7, BSCL2, ADORA1, TGFB1, AKT1, WNT4, FITM2, ATG7, H2AFY, RARA, SIK1, AKT2, EGR1, OPA3, DAB2IP, IRS2, SF1, ADIPOR1, GPER1, CDK4, POR, SCAP, DGAT1, DGAT2, CD81, TYSND1, PDGFRB, PLA2G6, MVK, ADORA2B, STK11, LMF1, DISP3, STUB1, SRC, NR1H2, PLIN5, CYP27B1, NR1D1, DHCR7, AGT, BCL11B, SCARB1, PIK3R2, SREBF1, PDK2, WDTC1, PSAP, EEF1A2, FDPS, SIRT4, IGF2, A…	70	0.00108716	2.96371
DG	Downregulated	GOTERM_BP_FAT	GO:0031647~regulation of protein stability	ATP1B2, HPS4, PEX6, PINK1, GET4, USP19, TMEM147, BAG6, GSN, BAG3, SOX17, PSMD8, WNT10B, FLOT2, TP53, PIM2, SMO, DACT1, MSX1, TELO2, CD81, SIAH3, WIZ, OTUD5, SYVN1, TADA3, HCFC1, GIPC1, HSPA1A, STUB1, SRC, CDC37, PFN1, GPR26, BCL2, TCF3, FBXW11, FBXO7, KAT2A, SREBF1, DVL3, SMAD7, PHB, MUL1, SIRT6, DVL1, LAMP1, PPIB, ID1, PLK1, RNF5, PHB2, DPM3, NOMO1, NCLN	55	0.000952922	3.02094
DG	Downregulated	GOTERM_BP_FAT	GO:0060078~regulation of postsynaptic membrane potential	PRKCZ, ADORA2A, GRIK5, CX3CL1, ADORA1, DMPK, GRIN2C, GRIN2D, DLG4, HCN4, HCN3, HCN2, STX1A, SCN2B, GRIN1, ASIC2, NLGN2, NLGN3, SHANK1, CDK5, SHANK3, DVL1, SLC17A7, P2RX4, ADRB1, CELF4, MAPK8IP2, CUX2, DBN1, WNT7A, SEZ6	31	0.000775473	3.11043
DG	Downregulated	GOTERM_BP_FAT	GO:0006836~neurotransmitter transport	KCNC4, KCNC3, SLC6A1, SYT5, SLC6A20, PNKD, SYT3, GRIK5, SYT9, AP2B1, TRIM9, SNAP47, SV2A, STX1A, NRXN2, PTPRN2, GPER1, GRM2, HTR6, RAB15, VAMP2, CLN8, PPFIA3, RAB3A, RAB3B, CPLX2, CPLX1, ADORA2A, BRSK1, SCRIB, RIMS3, SLC32A1, SYN1, TOR1A, APBA2, SYT10, SLC6A11, SYT11, SLC6A13, SLC6A17, ASIC1, DVL1, SLC17A7, SLC6A9, SYDE1, SLC6A8, SLC18A3, ADGRL1, WNT7A, NAT8L, CACNA1A	51	0.000677764	3.16892
DG	Downregulated	GOTERM_BP_FAT	GO:0007178~transmembrane receptor protein serine/threonine kinase signaling pathway	NOG, GDF1, LTBP3, LTBP4, CLDN5, FST, TGFB3, STOML1, LEMD2, TGFB1, ZIC2, MEN1, FOS, ACVR1B, HTRA3, ZYX, FBXL15, VASN, EGR1, SOX11, TP53, INHA, HES1, DACT1, MSX1, DACT2, HES5, JUN, KCP, VSIR, MAPK3, COL1A2, ROR2, PELO, TGFB1I1, PMEPA1, ZC3H3, MEGF8, FKBP8, STK11, COL3A1, GIPC1, PRDM16, STUB1, PXN, SRC, RGMA, RGMB, FOLR1, DUSP15, BCL9L, FAM89B, BCL9, BMP4, SMAD7, ZFP703, CSNK2B, FZD1, SKI, TAB1, FUR…	72	0.000598414	3.223
DG	Downregulated	GOTERM_BP_FAT	GO:0032535~regulation of cellular component size	LIMA1, LRRC8A, PLXNA1, HIP1R, WASF1, TRPV2, PREX1, CXCL12, AKT1, BAG4, SEMA3G, GSN, SEMA7A, SEMA3C, ISLR2, DSCAM, ANAPC2, DBNL, TWF2, LIMK1, BAIAP2, DRAXIN, PDXP, CDK4, SLC9A3R1, MYADM, CDK5, RPTOR, ARPC1A, NCK2, SEMA4G, ZFYVE27, CARMIL2, SEMA4F, SEMA4C, SEMA4B, SEMA4D, CLN8, DBN1, ADD2, ADD1, MEGF8, CDK5R1, RAB3B, TNFRSF12A, GRB2, ELN, ARPC4, ARF6, CDH4, SRF, PFN1, RGMA, CDC42EP1, AKT1S1, PFN3, …	84	0.000514766	3.28839
DG	Downregulated	GOTERM_BP_FAT	GO:0045667~regulation of osteoblast differentiation	FGFR1, NOG, PDLIM7, ATP6AP1, SOX2, FAM20C, TMEM64, GLI1, MEN1, WNT4, JUND, LIMD1, AXIN2, NFATC1, BMP4, WNT10B, ESRRA, ATRAID, SOX11, LMNA, FZD1, SKI, CTNNBIP1, HDAC5, WNT7B, NOTCH1, SFRP2, ID1, NPPC, GDF10, GNAS, PTCH1, SEMA4D, ID3, LRP5, IGFBP5	36	0.000460605	3.33667
DG	Downregulated	GOTERM_BP_FAT	GO:0018209~peptidyl-serine modification	DMTN, PDGFB, PINK1, AURKB, TGFB1, DMPK, AKT1, SPRY2, BAK1, BAG4, AKT2, CSNK1G2, PKN1, PRKCG, CDK5, MAST3, NCK2, MAST1, MAST2, BGN, MAPK3, MAP3K10, MAPK7, MAP3K12, GALNT2, PRKCZ, CDK5R1, MAMDC2, SPOCK2, MKNK2, MAPKAPK3, BRSK2, MKNK1, HK1, NTMT1, MAPKAPK2, SRC, GPD1L, RACK1, STK32C, VRK3, SBK1, TTBK1, INPP5J, BCL2, AGT, DCLK3, PKD1, DCLK2, CAMK2B, PDK2, MAP2K2, SMAD7, GAS6, RPS6KA4, CSNK1D, SFRP2, …	65	0.000425065	3.37154
DG	Downregulated	GOTERM_BP_FAT	GO:0061351~neural precursor cell proliferation	FGFR1, NOG, SETD1B, ZFP335, SOX2, DMRTA2, DISP3, CX3CL1, GLI2, EPHB1, TGFB1, GLI1, ARX, DAGLA, SPINT2, SMARCD3, CXCR4, POU3F2, ZFP503, RAPGEF1, FZD9, SOX10, NES, EMX1, TRNP1, PLXNB2, TP53, TEAD3, ADGRG1, SIRT2, GPR37L1, NUMBL, HDAC5, ATF5, ASCL1, SMO, WNT7B, NOTCH1, KDM2B, BTG2, FOXG1, DBN1, WNT7A, NCOR2, RERE	45	0.000352934	3.45231
DG	Downregulated	GOTERM_BP_FAT	GO:0090287~regulation of cellular response to growth factor stimulus	NOG, PDGFB, PPP2R5B, PPP2R5D, FAM20C, TGFB3, LEMD2, TGFB1, MEN1, SPRY2, SPRY1, WNT4, HTRA3, FBXL15, GPC1, VASN, DAB2IP, PTPRF, SOX11, TP53, DLL1, VEGFB, HES1, MSX1, HES5, KCP, VSIR, PELO, TGFB1I1, ADGRA2, PMEPA1, FGFR1, FKBP8, STK11, GIPC1, PRDM16, FUZ, RGMA, FOLR1, AGT, BCL9L, TCF4, BCL9, FAM89B, BMP4, MYO1C, SMAD7, ZFP703, FZD1, SKI, FURIN, KDR, CDKN1C, NBL1, NOTCH1, SFRP2, ULK1, SMURF1, ENG	59	0.000279465	3.55367
DG	Downregulated	GOTERM_BP_FAT	GO:0043009~chordate embryonic development	NOG, GDF1, PDGFB, ZFP335, LMO4, TGFB3, JAG2, TGFB1, ZIC2, PLOD3, RARA, ITPK1, RARG, EMX1, EMG1, RXRB, BYSL, RXRA, PLXNB2, DLL1, VASH1, BCL2L11, JUNB, MGAT1, ASCL2, HES1, MSX1, KDM2B, HES5, PDGFRB, ROR2, PYGO2, TFAP2C, COL1A1, ADD1, DEAF1, FGFR1, SYVN1, GRB2, ELL, TFEB, PTK7, DSCAML1, KEAP1, BCL2L1, SRF, XAB2, SCRIB, FUZ, LLGL2, PFN1, FBXW8, ECE1, FOLR1, NRARP, LHX2, HCN4, AXIN2, LFNG, MUC1, BMP4,…	143	0.000199237	3.70063
DG	Downregulated	GOTERM_BP_FAT	GO:0043393~regulation of protein binding	NOG, PDGFB, VTN, AURKB, MEN1, BAK1, AES, HSF1, SMARCD3, RALB, TFIP11, DAB2IP, PTPRF, ARHGEF7, FLOT1, CDK5, CTNNBIP1, HES1, DACT1, MAPK3, AMFR, ZFPM1, CARM1, MAPRE3, ADD2, ADD1, ADAM15, WFIKKN1, MFNG, STUB1, SRC, RGMA, EPHB6, CRMP1, BCL2, PEX14, PKD1, AGRN, LFNG, TRAF4, SPPL3, BMP4, NES, TMBIM6, RFNG, DVL1, HDAC5, ID1, PLK1, CSNK1E, BAX	51	0.000182651	3.73838
DG	Downregulated	GOTERM_BP_FAT	GO:0040011~locomotion	ADCY3, NOG, TUBB2B, EFNA2, PTPN23, ADORA1, S1PR1, GBF1, GRIN2C, SEMA7A, TYRO3, PLD2, DAB2IP, PTPRF, EFNB3, EFNB1, MDGA1, TBR1, PTPRO, SIRPA, VASH1, MARK2, VEGFB, JUP, HES1, RCC2, SERPINF1, JUN, RGCC, FOXG1, HTR6, ROR2, PDGFRB, KIF26A, ADGRA2, DBN1, CDK5R1, CDK5R2, ITGA11, EPHB3, EPHB4, SCRIB, EPHB1, EPHB2, FUZ, ARX, PFN1, NPHP4, LAMB2, ATN1, CRMP1, LHX2, IDH2, AGRN, PLTP, BMP4, SPNS2, MAP2K2, RHB…	272	0.000161629	3.79148
DG	Downregulated	GOTERM_BP_FAT	GO:0050890~cognition	ADCY3, JPH4, NOG, JPH3, ZFP385A, THRA, TUSC3, SLC6A1, TACR1, SOBP, ADORA1, FOXO6, SLC1A4, PAK6, FOS, DGCR2, EIF4EBP2, CHST10, EGR1, STS, EGR2, NRXN2, PRKCG, PCDH8, CDK5, TBR1, CRHR1, GRM4, AAAS, ADRB1, BTG2, SERPINF1, CHRM1, JUN, HTR6, C1QL1, PLA2G6, GNAS, AMFR, CUX2, NRGN, CLN8, DEAF1, ABCA7, PRKCZ, GLUD1, CRTC1, MDK, SRF, EPHB2, SLC11A2, HRH3, NPTX2, FZD9, B4GALT2, SLC8A2, GRIN1, ATP1A3, IGF2, …	74	0.000158238	3.80069
DG	Downregulated	GOTERM_BP_FAT	GO:0090066~regulation of anatomical structure size	PLXNA1, ADCY6, CXCL12, ADORA1, HTR1A, PLOD3, SEMA7A, ISLR2, DSCAM, ANAPC2, DBNL, TWF2, DRAXIN, BAIAP2, PDXP, RPTOR, ARPC1A, SERPINF2, DBN1, ADD2, ADD1, CDK5R1, ADORA2B, TNFRSF12A, ADORA2A, GRB2, ELN, HSPA1A, ARPC4, ARF6, CX3CL1, SRF, PFN1, PFN3, AKT1S1, CDC42EP1, ECE1, ADRA2C, CDC42EP4, RAP1GAP2, CDC42EP3, MYO1C, ARFIP2, EVL, ATP13A2, SHANK3, KDR, CORO1B, P2RX4, SEMA6A, CORO1A, SEMA6B, SEMA6C, UL…	115	0.000142678	3.84564
DG	Downregulated	GOTERM_BP_FAT	GO:0043269~regulation of ion transport	KCNC1, KCNC4, KCNC3, PDGFB, SLC6A1, ATP1B2, STOML1, CXCL12, ADORA1, TGFB1, DMPK, BAK1, GSTM2, CRY2, WWP2, GRIN2D, GALR2, IRS2, SCN2B, KCND1, STIM1, WNK2, CRHR1, HES1, HTR6, PDGFRB, VAMP2, ORAI1, SLC38A3, PPME1, GNAI2, ADORA2A, ADCYAP1R1, CACNB1, NKAIN1, CACNB3, NKAIN4, FXYD7, GPD1L, AGRN, HCN4, HCN3, HAP1, BMP4, HCN2, GRIN1, SPTBN4, CACNA1I, TMEM110, SHANK1, SELENON, SHANK3, KCNJ4, P2RX4, CORO1A,…	128	9.77269e-05	4.00999
DG	Downregulated	GOTERM_BP_FAT	GO:0007155~cell adhesion	CADM3, CADM4, ATP1B2, FGFRL1, PTPN23, RANGAP1, H1FX, RADIL, CDH22, SHB, RARA, PATZ1, RAPGEF1, CDH24, TYRO3, DBNL, PLD2, BSG, DAB2IP, PTPRF, EFNB3, EFNB1, PTPRS, SSPO, SIRPA, BCL2L11, MARK2, JUP, HES1, RND1, RCC2, HES5, SCYL1, RGCC, MAPK7, DBN1, SH3GL1, ADD1, CDK5R1, ITGA11, TAGLN2, EPHB3, EPHB4, SCRIB, EPHB1, PXN, PFN1, EPHB6, CDC42EP1, LAMB2, RAC3, NRARP, ZAP70, EMD, TCF3, LFNG, UNC45A, TECTA, B…	267	8.69256e-05	4.06085
DG	Downregulated	GOTERM_BP_FAT	GO:1901214~regulation of neuron death	SNCB, TGFB3, GRIK5, PINK1, PRDX2, CASP9, HSF1, UNC5B, BOK, ATG7, NQO1, AGAP2, EGR1, TYRO3, PTPRF, DRAXIN, TP53, PRKCG, SIGMAR1, CDK5, BCL2L11, CRHR1, VEGFB, ASCL1, GRM4, CHGA, KDM2B, BTG2, SERPINF1, JUN, UBE2M, UBB, FAIM2, MAP3K12, MAP3K11, PPP5C, CDK5R1, ADORA2A, CRLF1, EGLN2, ELK1, EGLN1, CNTFR, BCL2L1, CDC34, TMEM259, MDK, EPHB1, RACK1, AKT1S1, SNRK, BCL2, AGT, AGRN, FZD9, NES, AIMP2, GRIN1, F…	79	7.98389e-05	4.09779
DG	Downregulated	GOTERM_BP_FAT	GO:0035295~tube development	NOG, THRA, PDGFA, LTBP3, LMO4, TGFB3, VPS52, CXCL12, TGFB1, ZIC2, MAGED1, BAK1, WNT4, PLOD3, AARD, SLC4A2, RARA, ITPK1, DAB2IP, RARG, RXRA, PLXNB2, DLL1, BCL2L11, HES1, ASCL1, ADRM1, PPP1CA, KDM2B, HES5, MAPK3, PDGFRB, TFAP2C, DBN1, DEAF1, FGFR1, SOX2, ITGB4, PTK7, EPHB3, SOX9, SRF, SRC, PXN, SCRIB, FUZ, PFN1, FOLR1, NRARP, LHX2, TRAF4, BMP4, SREBF1, DVL3, CCM2, EPAS1, MAP2K2, SMAD7, SKI, TEAD2, …	144	7.25996e-05	4.13907
DG	Downregulated	GOTERM_BP_FAT	GO:0022037~metencephalon development	KCNC1, CDK5R1, CDK5R2, GLUD1, NANOS1, NF1X, GLI2, MDK, SCRIB, GLI1, SEZ6L2, BCL2, COQ8B, ATG7, HAP1, SAMD4B, KAT2A, B4GALT2, TRNP1, OTX1, GRIN1, AK3, TP53, PTPRS, DLL1, SEZ6L, GAS1, CDK5, WHRN, ASCL1, SMO, SSTR2, ULK1, MYO16, SEMA4C, NEUROD2, GDF10, WNT7A, SEZ6, RERE, CACNA1A, FAIM2, CBS	43	7.2269e-05	4.14105
DG	Downregulated	GOTERM_BP_FAT	GO:0010498~proteasomal protein catabolic process	MAEA, UBE2G2, RNF185, MAN1B1, RNF216, RNF187, UBQLN2, CBFA2T3, FBXL19, AKT1, USP19, BAG6, WWP2, SHARPIN, TRIM9, POMT1, ATG7, BTBD2, TMUB1, RBCK1, DDA1, FBXL15, PSMD8, AGAP3, AUP1, DAB2IP, WNT10B, CCNF, BTBD6, MTA1, PRKCG, SIAH3, AMFR, SIAH2, OTUD5, FZR1, SYVN1, ABTB2, USP5, RAD23A, ABTB1, GIPC1, KEAP1, NHLRC1, CDC34, STUB1, TRIB2, RACK1, PSMB5, RNF126, MTM1, TMEM129, FBXW5, NR1D1, FBXW4, TOR1A, F…	83	7.20736e-05	4.14222
DG	Downregulated	GOTERM_BP_FAT	GO:0008219~cell death	NOG, GDF1, SNCB, AURKB, CIAPIN1, ADORA1, MAGED1, DCPS, CLPTM1L, BAK1, HTRA2, CREB3L1, RARA, TYRO3, DAB2IP, WNT10B, RARG, PTPRF, PCID2, RXRA, TMEM132A, PIM3, PIM2, BCL2L11, CRHR1, VEGFB, PARP16, NME4, PPP1CA, NME3, MSX1, SERPINF1, PIAS4, JUN, MAPK3, RGCC, MNT, PDGFRB, MAPK7, BIN1, BLCAP, HIGD2A, CDK5R1, ACP2, ARF6, HSPA1A, BCL2L1, CDC34, SCRIB, EPHB1, SLC11A2, ATN1, AGRN, ZFP346, BMP4, CRIP1, PHB,…	336	5.90823e-05	4.22854
DG	Downregulated	GOTERM_BP_FAT	GO:0001649~osteoblast differentiation	NOG, PDLIM7, ATP6AP1, FAM20C, GABBR1, GLI2, TMEM64, GLI1, AKT1, MEN1, WNT4, SEMA7A, SND1, CREB3L1, WNT10B, SOX11, JUNB, CTNNBIP1, SMO, NPPC, GNAS, COL1A1, SEMA4D, ALPL, FGFR1, ACHE, TNC, SOX2, PTH1R, ITGA11, RACK1, JUND, FASN, LIMD1, AXIN2, NFATC1, BMP4, ATRAID, PHB, FZD1, LMNA, SKI, IGF2, SNAI1, FBL, HDAC5, MEF2D, WNT7B, NOTCH1, SFRP2, ID1, GDF10, PTCH1, H3F3B, ID3, TP53INP2, IGFBP5, LRP5	58	4.59872e-05	4.33736
DG	Downregulated	GOTERM_BP_FAT	GO:0044723~single-organism carbohydrate metabolic process	TUSC3, PDGFB, PGAM1, ITPKA, TGFB1, PGP, ST3GAL2, ST3GAL5, RPN2, DDOST, A3GALT2, IRS2, SCAMP3, MGAT1, PARP16, VEGFB, MGAT3, PPP1CA, XXYLT1, PGM1, NEU1, EXT2, NEU4, SYVN1, MGAT5B, STK11, ADCYAP1R1, PTH1R, EXTL1, SESN2, G6PC3, SRC, PPP1R3E, ISYNA1, GORASP1, PPP1R3G, GYS1, IDH2, GALE, FKRP, MGAT4B, B4GALT3, DHDDS, ENGASE, USF1, TMEM115, B3GAT1, MAN2C1, ST8SIA5, CACNA1A, PC, NDST1, UBE2G2, ALG3, MAN1B…	127	3.43654e-05	4.46388
DG	Downregulated	GOTERM_BP_FAT	GO:0061448~connective tissue development	NOG, PPARD, THRA, PDGFB, LTBP3, GLI2, TGFB1, SLC25A25, OSR1, RARA, EGR1, WNT10B, HYAL2, RARG, RELA, ARID5A, PKDCC, CDK4, POR, MYCN, ADAMTS7, ADRM1, MSX1, DGAT2, HES5, MAPK3, NPPC, PDGFRB, ROR2, GNAS, COL1A1, WNT9A, UBB, CARM1, FGFR1, SLC39A13, PTH1R, COL2A1, SOX9, SERPINH1, SRF, GPR4, CHADL, COMP, FBXW4, PKD1, AXIN2, THBS3, MAF, BMP4, CRIP1, ESRRA, LMNA, FRZB, SNAI1, SELENOM, MEF2D, WNT7B, NOTCH1…	67	2.81011e-05	4.55128
DG	Downregulated	GOTERM_BP_FAT	GO:0016358~dendrite development	LZTS1, SRCIN1, ITPKA, FOXO6, PACSIN1, CUL7, PAK4, DLG4, SS18L1, DSCAM, ANAPC2, DAB2IP, PTPRF, BAIAP2, CDK5, FARP1, NUMBL, NCK2, DACT1, CUX2, SEMA4D, CARM1, DBN1, SEZ6, IGSF9, SLITRK5, NEURL1, PALM, ACHE, CDK5R1, STK11, CRTC1, ARF6, EPHB3, EPHB1, EPHB2, SLC11A2, FBXW8, GORASP1, BCL11A, OBSL1, CAMK2B, GIT1, FLRT1, GRIN1, NLGN2, CELSR2, NLGN3, SHANK1, SHANK3, DVL1, FEZF2, SARM1, GSK3A, ID1, FYN, MAP…	66	1.1374e-05	4.94409
DG	Downregulated	GOTERM_BP_FAT	GO:0048675~axon extension	MEGF8, CDK5R1, PLXNA1, NDN, TNFRSF12A, TRPV2, CXCL12, SRF, CDH4, LAMB2, SEMA3G, LHX2, SEMA7A, BCL11A, SEMA3C, DSCAM, AATK, ISLR2, ANAPC2, TWF2, LIMK1, PLXNB1, DRAXIN, RTN4R, NLGN3, CDK5, SLIT3, DVL1, SEMA6A, SMO, SEMA6B, SEMA6C, ZFYVE27, SEMA4G, ULK1, SEMA4F, SEMA4C, SEMA4B, SEMA4D, DBN1, HDAC6	41	6.98794e-06	5.15565
DG	Downregulated	GOTERM_BP_FAT	GO:0006886~intracellular protein transport	THRA, HM13, CHERP, U2AF2, TGFB3, EIF5A, RANGAP1, ZIC1, ADORA1, TGFB1, AIP, RUNDC1, CRY2, HTRA2, RAE1, TBC1D13, RBCK1, RNF31, AUP1, BSG, DAB2IP, PKIG, ERP29, MRGPRE, DCTN1, JUP, HES1, SGSM1, SGSM3, JUN, MAPK3, PEX26, SURF4, MAPK7, VAMP2, VAMP1, MAVS, GPN2, PALM, CDK5R1, SYVN1, NFKBIB, SNX8, CACNB1, UNC93B1, GIPC1, KEAP1, CHCHD4, HSPA1L, TMEM129, OAZ1, GPR26, AXIN2, EMD, SEC61A1, FBXO7, AP2M1, SYS1…	183	5.38669e-06	5.26868
DG	Downregulated	GOTERM_BP_FAT	GO:0005975~carbohydrate metabolic process	EIF6, TUSC3, GNPDA1, PDGFB, PGAM1, ITPKA, TGFB1, PGP, ST3GAL2, ST3GAL5, RPN2, DDOST, YDJC, A3GALT2, HHIPL1, IRS2, SCAMP3, MGAT1, VEGFB, PARP16, PPP1CA, PGLS, MGAT3, XXYLT1, MLEC, PGM1, NEU1, EXT2, MDH2, NEU4, SYVN1, TALDO1, MGAT5B, STK11, ADCYAP1R1, PTH1R, EXTL1, SESN2, G6PC3, SRC, GPD1L, PPP1R3E, ISYNA1, GORASP1, PPP1R3G, NAGA, GYS1, IDH2, GALE, FKRP, MGAT4B, B4GALT3, DHDDS, B4GALT2, ENGASE, USF…	150	5.25044e-06	5.2798
DG	Downregulated	GOTERM_BP_FAT	GO:0048762~mesenchymal cell differentiation	NOG, TGFB3, TGFB1, WNT4, CUL7, OSR1, SEMA3G, SEMA7A, SEMA3C, VASN, SOX10, WNT10A, DAB2IP, EFNB1, SOX11, ADIPOR1, HES1, SMO, MSX1, SEMA4G, DACT3, SEMA4F, RGCC, MAPK3, SEMA4C, SEMA4B, TGFB1I1, COL1A1, SEMA4D, ADAM15, FGFR1, WNT16, SOX9, FUZ, FOLR1, BCL2, BCL9L, AXIN2, HNRNPAB, NFATC1, BMP4, TRIM28, ZFP703, TBX1, FRZB, TRIM62, SNAI1, SEMA6A, SEMA6B, NOTCH1, SEMA6C, SFRP2, HEYL, ENG	54	4.94693e-06	5.30566
DG	Downregulated	GOTERM_BP_FAT	GO:0071705~nitrogen compound transport	SLC6A1, SLC6A20, EIF5A, SYT9, SIDT1, SIDT2, SLC52A2, SLC7A4, SLC7A5, SLC52A3, CXCL12, ADORA1, C2CD2L, RAE1, ATG7, SLC25A23, SLC25A22, SLC25A29, IRS2, SLC12A9, PCID2, PTPRN2, PTBP1, PIM3, TCN2, PTPRN, RPTOR, CRHR1, HTR6, CARTPT, SLC38A5, ZC3H3, GPN2, SLC38A3, ADORA2B, ADORA2A, SLC38A7, GLUD1, SLC38A10, ENSA, SLC32A1, SLC29A3, OAZ1, SLC48A1, FOLR1, GPR27, SLC29A4, SLC35F3, SREBF1, RPSA, ABCB9, SLC6…	147	4.63688e-06	5.33377
DG	Downregulated	GOTERM_BP_FAT	GO:0042063~gliogenesis	NOG, WASF3, PDGFB, CSPG4, NF1X, VTN, APCDD1, TGFB1, MMP24, AKT1, METRN, GSN, BOK, CDKN2C, CXCR4, LGI4, OLIG1, CSK, GPC1, EIF2B4, AKT2, EGR1, SOX10, DAB2IP, EGR2, EMX1, ARHGEF7, RELA, FA2H, SOX11, DLL1, EEF2, MMP14, MBD1, CDK5, GPR37L1, MYCN, PRDM8, ASCL2, HES1, ASCL1, SMO, HES5, LAMC3, NAB2, FOXG1, MAPK3, ROR2, BIN1, GAP43, TNFRSF21, CDK5R1, CDK5R2, NDN, ADORA2A, SOX9, SCRIB, LINGO1, LAMB2, CERS2…	78	4.15682e-06	5.38124
DG	Downregulated	GOTERM_BP_FAT	GO:0006811~ion transport	CALHM2, ATP1B2, STOML1, ADORA1, SLC35A2, SLC26A11, SLC35A4, GOT2, BAK1, CRY2, WWP2, GRIN2C, GRIN2D, GRID1, SLC12A8, SLC12A9, SCN2B, WNK2, CRHR1, HES1, LHFPL5, HTR6, PDGFRB, ADD2, ADD1, ORAI2, ORAI1, SLC2A10, GNAI2, CACNB1, SFXN3, CACNB3, SFXN5, GPD1L, SLC32A1, ATP6V0C, SLC11A2, AGRN, HAP1, BMP4, NDUFA4L2, TMEM110, ATP13A2, GAS6, KCNK4, KCNJ4, ATP6V0E2, ATP13A1, CNIH2, KCNJ9, LASP1, GRK6, CHRNB2, …	269	3.35962e-06	5.47371
DG	Downregulated	GOTERM_BP_FAT	GO:0048588~developmental cell growth	PLXNA1, TRPV2, SYT3, CXCL12, PRMT2, SEMA3G, SEMA7A, SEMA3C, ISLR2, DSCAM, ANAPC2, TWF2, RARG, EMX1, SLC25A4, PLXNB1, LIMK1, DRAXIN, CDK5, SLIT3, DDR1, SMO, ADRB1, SEMA4G, ZFYVE27, SEMA4F, SEMA4C, SEMA4B, SEMA4D, DBN1, PRKCZ, MEGF8, CDK5R1, NDN, TNFRSF12A, STK11, SOX9, CDH4, SRF, RASAL1, RGMA, LAMB2, AGT, LHX2, BCL11A, AATK, FLRT1, CPNE5, CPNE6, FDPS, RTN4R, MUL1, NLGN3, SIRT6, ATP13A2, DVL1, SEMA…	63	2.50611e-06	5.601
DG	Downregulated	GOTERM_BP_FAT	GO:0010563~negative regulation of phosphorus metabolic process	NOG, PDGFB, SRCIN1, CTDSPL, PDGFA, PPP2R5A, LEMD2, LRRC4B, WDR81, CACTIN, TGFB1, BAK1, SHB, CRY2, CDKN2C, GALR2, SPRED2, H2AFY, CTDSP1, SPRED3, CTDSP2, RAPGEF1, LRRC4, PPP1R37, IRS2, DAB2IP, SOCS1, PKIG, PPP1R35, WNK2, FARP1, JUN, HSPB1, MAPK7, CCDC8, PPP5C, PALM, ADORA2A, ELL, ENSA, GPD1L, DUSP18, AKT1S1, VRK3, DUSP16, FBXO7, PARD6A, BMP4, PCIF1, SMAD7, PHB, CAMK2N2, CAMK2N1, DVL1, CDKN1C, NUP62…	128	2.36024e-06	5.62704
DG	Downregulated	GOTERM_BP_FAT	GO:0006366~transcription from RNA polymerase II promoter	SCAF1, NOG, GDF1, PPP2R5B, PPP2R5D, FST, MED25, LEMD2, MED24, AURKB, MAMSTR, S1PR1, CRY2, WWP2, MED26, CREB3L1, H2AFY, RARA, PATZ1, HTRA3, DAB2IP, WNT10B, RARG, PCID2, RXRB, RCOR2, RXRA, PTBP1, RXRG, ZFP467, TBR1, TOX2, HES1, MSX1, HES5, PIAS4, SERPINF2, MED16, JUN, MAPK3, FOXG1, RGCC, MNT, ROR2, PELO, MAPK7, DEAF1, ELL, CRTC1, ARX, NR1H2, PFN1, ATN1, NRARP, LHX2, AGRN, TCF4, TCF3, TCF25, ARHGEF1…	319	8.33994e-07	6.07884
DG	Downregulated	GOTERM_BP_FAT	GO:0007167~enzyme linked receptor protein signaling pathway	NOG, GDF1, PDGFB, PPP2R5B, LTBP3, PDGFA, LTBP4, EFNA2, PPP2R5D, EFNA3, FST, FGFRL1, TGFB3, STOML1, LEMD2, CSPG4, ADORA1, TGFB1, ZIC2, SHKBP1, SLC2A8, WNT4, EIF4EBP2, FRS3, HTRA3, RAPGEF1, MVB12B, IRS2, DAB2IP, PTPRF, EFNB3, RELA, BAIAP2, EFNB1, SOCS1, VEGFB, HES1, ADRM1, MSX1, HES5, JUN, MAPK3, VSIR, COL1A2, PDGFRB, HSPB1, ROR2, PELO, COL1A1, TGFB1I1, ADGRA2, NEURL1, ZC3H3, FGFR1, CDK5R1, GRB2, S…	170	2.61161e-07	6.58309
DG	Downregulated	GOTERM_BP_FAT	GO:0009893~positive regulation of metabolic process	PPP2R5B, PPP2R5A, PPP2R5D, MED25, MED24, MAGED1, MAMSTR, DIRAS1, PATZ1, DDAH2, WNT10A, WNT10B, PCID2, RXRB, RXRA, PTBP1, RXRG, TOX2, BCL2L11, RPTOR, MSX1, SERPINF2, MED16, JUN, MAPK3, ROR2, MAPK7, MOB2, GNAI2, CRTC1, PTH1R, RUNDC3A, HSPA1A, CHCHD4, SCRIB, ARX, PFN1, LPCAT1, PPP1R3G, DUSP15, PABPC1, TCF4, TCF3, ARHGEF10L, SPPL3, UNC119, DVL3, ESRRA, TAOK2, MAP2K2, PHB, USF1, GAS6, USF2, DVL1, MLYC…	523	2.44772e-07	6.61124
DG	Downregulated	GOTERM_BP_FAT	GO:1905114~cell surface receptor signaling pathway involved in cell-cell signaling	NOG, GRIK5, AMOTL2, ADORA1, DMPK, WNT4, GRIN2C, GRIN2D, RAPGEF1, WNT10A, DAB2IP, WNT10B, CSNK1G2, DRAXIN, PTPRO, MARK2, MGAT3, CELF4, PYGO2, ROR2, COL1A1, TGFB1I1, DBN1, ADORA2A, STK11, SOX2, PTK7, CX3CL1, SOX9, SRC, FUZ, AMER3, ATP6V0C, NPHP4, FOLR1, NRARP, AXIN2, TMEM198, EMD, BMP4, DVL3, GRIN1, CELSR2, SHANK1, PORCN, SHANK3, DVL1, P2RX4, NOTCH1, SFRP2, TSC2, GRK6, LZTS2, GLI2, APCDD1, TMEM64, …	109	7.84643e-08	7.10533
DG	Downregulated	GOTERM_BP_FAT	GO:0050808~synapse organization	PDGFB, SNCB, CLSTN3, LRTM2, CLSTN1, LRRC4B, DMPK, SEZ6L2, HTR1A, DLG4, KIRREL3, DSCAM, ADGRB2, LRRC4, DBNL, ANAPC2, DAB2IP, NRXN2, MDGA1, ADGRE5, SDK2, NECTIN1, SEZ6L, CACNG2, LRRC24, CDK5, FARP1, DACT1, C1QL1, CUX2, DBN1, SEZ6, SLITRK5, NEURL1, PALM, RAB3A, ACHE, TNC, CACNB1, CACNB3, EPHB3, EPHB1, EPHB2, LAMB2, LRRTM1, CAMK2B, AGRN, ETV5, FZD9, FLRT1, GRIN1, ASIC2, NFASC, NLGN2, NLGN3, PDZRN3, S…	70	5.29208e-08	7.27637
DG	Downregulated	GOTERM_BP_FAT	GO:0048589~developmental growth	NOG, PLXNA1, SYT3, CXCL12, TGFB1, S1PR1, HTRA2, SLC25A25, SEMA7A, SPR, RARA, ISLR2, DSCAM, ANAPC2, WNT10B, RARG, TWF2, EMX1, PLXNB1, RXRB, DRAXIN, RXRA, DLL1, POR, BCL2L11, PDGFRB, PYGO2, TFAP2C, DBN1, ADD1, FGFR1, CDK5R1, TNFRSF12A, STK11, SOX2, PTK7, NINJ1, SOX9, SRF, LLGL2, ARX, RASAL1, LAMB2, ATN1, LHX2, AGRN, BMP4, CCM2, CPNE5, CPNE6, SPTBN4, FDPS, MUL1, ICMT, GAS1, EHMT2, SELENOM, ATP13A2, …	162	2.71812e-08	7.56573
DG	Downregulated	GOTERM_BP_FAT	GO:0071310~cellular response to organic substance	PPP2R5B, LTBP3, PPP2R5D, LTBP4, MED24, RANGAP1, SYP, RAE1, RPLP0, LRRC4, WNT10A, WNT10B, PTPRF, RXRB, RXRA, RXRG, PTPRN, RPTOR, ADAMTS7, JUP, SSTR2, MSX1, SERPINF1, MED16, JUN, MAPK3, ROR2, PELO, MAPK7, NFKBIB, HSPA1A, BCL2L1, PFN1, DUSP15, TCF4, ESRRA, MAP2K2, PHB, KLF10, GAS1, USF1, GAS6, KCNK4, HMGCS2, SMURF1, SLC9A1, UBE2G2, YBX3, RNF185, HSF1, SIK1, FBXL15, HYAL2, TP53, NCK2, CCND1, CCND3, G…	401	7.85038e-09	8.10511
DG	Downregulated	GOTERM_BP_FAT	GO:0065009~regulation of molecular function	OXA1L, PPP2R5B, PPP2R5A, CYP2D4, STOML1, MED25, RANGAP1, WDR81, MAGED1, DIRAS1, RUNDC1, AUP1, LRRC4, PPP1R37, WNT10B, SCN2B, PTPRF, PCID2, RXRB, PPP1R35, SIPA1L2, SIPA1L3, BCL2L11, RPTOR, JUP, MSX1, RCC2, TRAPPC9, SERPINF1, SERPINF2, MED16, JUN, MAPK3, ROR2, WFDC1, MAPK7, GNAI2, RHPN1, ARHGEF25, CRTC1, CACNB1, RUNDC3A, TRPT1, CACNB3, HSPA1A, BCL2L1, SERPINH1, SCRIB, ADAP1, PFN1, DUSP18, CDC42EP1,…	488	6.50379e-11	10.1868
DG	Downregulated	GOTERM_BP_FAT	GO:0051641~cellular localization	OXA1L, PLEKHM2, PPP2R5A, VPS52, RANGAP1, WDR81, RUNDC1, HTR1A, RAE1, AUP1, LRRC4, BSG, TTC7A, PCID2, TTC7B, PTPRN, YIF1B, YIF1A, ERGIC1, JUP, AAAS, MSX1, RCC2, JUN, MAPK3, SURF4, MAPK7, NFKBIB, CACNB1, CACNB3, ARF6, BCL2L1, CHCHD4, SCRIB, HSPA1L, TMEM129, TPGS1, OBSL1, SPPL3, DVL3, RPSA, NPLOC4, MAP2K2, TMEM110, GAS1, KIF3C, GAS6, DVL1, GOLGA7B, HPCA, HGS, SMURF1, MAP6, SLC9A1, LZTS2, ZFP385A, UB…	445	1.53214e-11	10.8147
DG	Downregulated	GOTERM_BP_FAT	GO:0051049~regulation of transport	ATP1B2, SYT5, PNKD, U2AF2, SYT3, FST, NELL2, PTPN23, STOML1, SYT9, RANGAP1, SIDT2, ADORA1, BAK1, RUNDC1, CRY2, HTR1A, HTRA2, WWP2, GRIN2D, PLD2, DAB2IP, SCN2B, PTBP1, PIM3, WNK2, SIRPA, DCTN1, RPTOR, CRHR1, HES1, JUP, MAPK3, HTR6, RGCC, PDGFRB, RAB15, MAPK7, BIN1, DBN1, ADD1, ORAI1, CDK5R1, CALY, CDK5R2, GNAI2, NFKBIB, CACNB1, CACNB3, HSPA1A, CHCHD4, RIMS3, GPD1L, HSPA1L, NR1H2, IDH2, AGRN, EMD, …	371	1.1856e-11	10.9261
DG	Downregulated	GOTERM_BP_FAT	GO:0007417~central nervous system development	NOG, BTD, ZFP335, EFNA2, SZT2, XRCC1, CDH22, BAK1, S1PR1, HTRA2, HIST1H2BK, SEMA7A, RARA, H2AFX, EIF2B4, TYRO3, DAB2IP, EMX1, BYSL, MDGA1, TMEM132A, PTPRS, TBR1, BCL2L11, CRHR1, PRDM8, HES1, SSTR2, MSX1, HES5, TRAPPC9, LAMC3, MAPK3, FOXG1, HTR6, ROR2, BIN1, ADGRA2, DBN1, MPST, CDK5R1, CDK5R2, BCL2L1, EPHB3, XAB2, SCRIB, EPHB1, EPHB2, FUZ, ARX, SLC32A1, LAMB2, RAC3, LHX2, HAP1, BMP4, SPHK2, ROGDI,…	240	3.13005e-12	11.5044
DG	Downregulated	GOTERM_BP_FAT	GO:0060284~regulation of cell development	MCRIP1, NOG, PPP2R5B, ZFP335, PPP2R5D, ADCY6, SYT3, EFNA3, SHB, S1PR3, BRINP2, CUL7, SEMA7A, RARA, RAPGEF1, ISLR2, ANAPC2, DAB2IP, PTPRF, EMX1, PTBP1, HMG20B, TBR1, MARK2, HES1, RCC2, HES5, SERPINF1, RGCC, FOXG1, TGFB1I1, ADGRA2, BIN1, DBN1, PALM, CDK5R1, MOB2, CRTC1, ARF6, HSPA1A, EPHB3, EPHB2, FUZ, ATN1, CRMP1, RAC3, GORASP1, IDH2, OBSL1, AGRN, RAP1GAP2, TCF4, TCF3, HAP1, BMP4, MAP2K2, SMAD7, S…	234	4.71623e-13	12.3264
DG	Downregulated	GOTERM_BP_FAT	GO:0036211~protein modification process	PPP2R5B, PPP2R5A, PPP2R5D, MED24, USP51, MAGED1, PGP, TAF5L, DIRAS1, BRPF3, CUL7, CUL9, BTBD2, LRRC4, TYRO3, PTPRF, PTPRS, BTBD6, HMG20B, MARK4, PTPRO, RPTOR, MARK2, PPP1CA, SCYL1, SERPINF2, JUN, MAPK3, ROR2, MAPK7, PPP2R3B, MGAT5B, GNAI2, MOB2, ACP2, HSPA1A, TRPT1, PPP1R3E, DUSP18, TMEM129, TPGS1, GORASP1, KBTBD6, DUSP15, DUSP16, ZAP70, TCF3, MGAT4B, SPPL3, UNC119, DVL3, TAOK2, MAP2K2, PHB, ENGA…	639	1.87295e-13	12.7275
DG	Downregulated	GOTERM_BP_FAT	GO:0007267~cell-cell signaling	NOG, SNCB, SYT5, PNKD, LTBP4, SYT3, FST, NELL2, SYT9, SIDT2, ADORA1, AMOTL2, SYP, HTR1A, CRY2, GRIN2C, GRIN2D, RARA, RAPGEF1, GJD2, ANAPC2, WNT10A, DAB2IP, WNT10B, PTBP1, PIM3, PTPRN, PTPRO, RPTOR, MARK2, CRHR1, HES1, MGAT3, SSTR2, HTR6, ROR2, RAB15, TGFB1I1, DBN1, GNAI2, CRTC1, CACNB1, ACP2, CACNB3, SCRIB, EPHB2, RIMS3, FUZ, ATP6V0C, NPHP4, TPGS1, RAC3, NRARP, AGRN, EMD, HAP1, IQSEC2, BMP4, DVL3…	291	5.56365e-16	15.2546
DG	Downregulated	GOTERM_BP_FAT	GO:0051128~regulation of cellular component organization	MCRIP1, PLEKHM2, PPP2R5B, PPP2R5A, PPP2R5D, MED25, RUNDC1, HTR1A, CUL7, CUL9, LRRC4, WNT10B, PTPRF, PCID2, PTBP1, SIRPA, BCL2L11, MARK2, MSX1, RCC2, SERPINF1, SERPINF2, JUN, MAPK3, SURF4, WFDC1, IGFBPL1, MOB2, CRTC1, ARF6, HSPA1A, BCL2L1, HSPA1L, PFN1, NPHP4, CDC42EP1, PFN3, RAC3, GORASP1, OBSL1, CDC42EP4, CDC42EP3, ARHGEF10L, UNC119, TAOK2, MAP2K2, PHB, GAS1, KIF3C, GAS6, DVL1, HPCA, H3F3B, TNK2…	486	1.8121e-18	17.7418
DG	Downregulated	GOTERM_BP_FAT	GO:0023051~regulation of signaling	PEAR1, PPP2R5B, PPP2R5D, STOML1, MAGED1, SHKBP1, SYP, DIRAS1, HTR1A, LRRC4, TYRO3, WNT10B, PTPRF, RXRB, PTBP1, SIPA1L2, SIPA1L3, PTPRO, RPTOR, BCL2L11, PPP1CA, MSX1, SERPINF2, MED16, JUN, MAPK3, ROR2, PELO, MAPK7, GNAI2, ARHGEF25, NFKBIB, CRTC1, HSPA1A, ARF6, BCL2L1, SCRIB, ATP6V0C, DUSP18, NPHP4, DUSP15, DUSP16, ZAP70, TCF4, LFNG, ARHGEF10L, IQSEC1, IQSEC2, GIT1, SPPL3, DVL3, TAOK2, MAP2K2, PHB,…	572	1.97103e-21	20.7053
DG	Downregulated	GOTERM_BP_FAT	GO:0007399~nervous system development	BTD, PPP2R5B, TUBB2B, PPP2R5D, XRCC1, WDR81, CDH22, HIST1H2BK, CUL7, WNT10A, TYRO3, SCN2B, PTPRF, RXRB, RXRA, PTBP1, RXRG, PTPRS, BTBD6, TMEM132A, HMG20B, MARK4, PTPRO, BCL2L11, MARK2, SSTR2, MSX1, TRAPPC9, SERPINF1, JUN, MAPK3, FOXG1, ZNHIT2, ROR2, MOB2, CRTC1, HSPA1A, ARF6, BCL2L1, XAB2, SCRIB, ARX, PFN1, NPHP4, DAGLA, ATN1, GORASP1, RAC3, OBSL1, TCF4, TCF3, GIT1, DVL3, SPHK2, MAP2K2, ROGDI, GA…	532	1.73905e-31	30.7597
DG	Downregulated	GOTERM_CC_FAT	GO:0005768~endosome	SEC31A, PLEKHM2, PLEKHM1, SYT5, SYT3, ADCY6, PTPN23, VPS52, AMOTL2, STARD3, PACSIN1, S1PR1, TRAK1, TMUB1, RAPGEF1, SCAMP5, MVB12B, DBNL, ATG9A, PTPRF, PTPRN, CRHR1, RCC2, TRAPPC9, MIB2, MAPK3, BACE1, RAB15, CLIP3, SH3GL1, ABCA7, RAB7B, GRB2, SNX8, ADCYAP1R1, UNC93B1, RABEPK, ARF6, ABCA2, EPHB1, LLGL1, SRC, SLC11A2, SLC29A3, ECE1, SLC48A1, SLC30A3, HAP1, ABCB9, MAP2K2, PHB, SYT11, SPPL2B, ATP13A2,…	133	0.0293439	1.53248
DG	Downregulated	GOTERM_CC_FAT	GO:0030176~integral component of endoplasmic reticulum membrane	TM7SF2, FKBP8, HM13, BSCL2, GPAA1, RCE1, G6PC3, SLC35B1, SLC35B2, FITM2, DHCR7, LBR, EMC10, TEX261, AUP1, SPPL3, ABCB9, CREB3, SPPL2B, PIGT, STIM1, PIGS, TECR, PORCN, SREBF2, DOLK, PREB, ZFYVE27, DGAT2, DPM3, EMC1, AMFR, DOLPP1	33	0.0151356	1.82
DG	Downregulated	GOTERM_CC_FAT	GO:0031252~cell leading edge	KCNC1, KCNC3, WASF3, PDLIM7, SRCIN1, WASF1, LMO4, BCAR1, TRPV2, GABBR1, CSPG4, PIP5K1C, MTSS1L, ADORA1, KCNJ11, PACSIN1, GBF1, GSN, UNC5A, CXCR4, AKT2, PLD2, DBNL, TWF2, ACTA1, ARHGEF7, INPPL1, FLOT2, BAIAP2, FLOT1, PDXP, GPER1, DDN, SLC9A3R1, MYADM, CDK5, DCTN1, MTMR14, BSPRY, PSD, CARMIL2, GNAS, DBN1, SPATA13, PARVB, ABCA7, PALM, PRKCZ, APC2, TNFRSF12A, ADORA2A, ITGB4, ARF6, CYTH3, SCRIB, CDC37…	81	0.0086939	2.06079
DG	Downregulated	GOTERM_CC_DIRECT	GO:0005739~mitochondrion	OXA1L, TARS2, SNCB, CYP2D4, PNKD, FAM110B, TMEM143, WDR81, DCPS, GOT2, BAK1, CRY2, GBF1, HTRA2, TRAK1, DHX34, MRPL37, ABCB10, MRPL38, DHX30, DDAH2, OPA3, BSG, GTPBP3, NUDT19, RPUSD3, TBRG4, MRM2, BCL2L11, NME4, NME3, MAPK3, EEFSEC, MDH2, MPST, HIGD2A, HSD17B10, TNRC18, ELN, SFXN3, HSPA1A, BCL2L1, CHCHD4, SFXN5, HSPA1L, IDH2, MRPL55, LETMD1, HAP1, FBXO7, DCAKD, BRI3BP, MAP2K2, PHB, FDXR, ABCG1, PO…	270	0.0084209	2.07464
DG	Downregulated	GOTERM_CC_DIRECT	GO:0070062~extracellular exosome	HIST2H2AA3, BTD, RPL14, LTBP3, TUBB2A, LTBP4, RUSC2, PGAM1, HIST1H2BO, RPLP0, DDAH2, AUP1, BSG, PTPRF, PTBP1, PTPRS, TMEM132A, SIRPA, PTPRO, GLTP, JUP, PPP1CA, NME3, SERPINF1, SERPINF2, MAPK3, ARL8A, GNAI2, PTH1R, PPT2, ARF6, PRRC2A, ACP2, ARF5, SERPINH1, SCRIB, ATP6V0C, PFN1, RAC3, NAGA, PABPC1, TUBB4A, TECTA, RPSA, PHB, FXR2, GAS6, EMILIN1, PKP1, LASP1, UBA1, HGS, TPRG1L, H3F3B, SMURF1, FCGBP, …	428	0.00512419	2.29037
DG	Downregulated	GOTERM_CC_DIRECT	GO:0030173~integral component of Golgi membrane	SYS1, MFNG, UBIAD1, RFNG, YIF1B, YIF1A, SLC35B1, ST3GAL2, ST3GAL5, SLC35B2, ST8SIA5, ENTPD4, QSOX2, LFNG, TBC1D20, QSOX1, TEX261, B4GALNT1	18	0.00286971	2.54216
DG	Downregulated	GOTERM_CC_FAT	GO:0033267~axon part	SEPT5, KCNC1, KCNC4, KCNC3, SNCB, TRPV2, CLDN5, GRIK4, GABBR1, AP3S2, GRIK5, RANGAP1, SYNGR1, WDR81, ADORA1, KCNJ11, SYP, PACSIN1, HTR1A, DLG4, CNTNAP1, SV2A, KCNQ2, BOC, DAB2IP, LIMK1, PTPRN2, GPER1, PTPRN, SMO, GRM4, CHRM4, SERPINF1, CHRM1, PEBP1, VAMP2, VAMP1, BIN1, DBN1, EPN1, PRKCZ, RAB3A, CPLX2, CPLX1, ADORA2A, FKBP4, ELK1, SLC32A1, DAGLA, SYN1, BLOC1S3, AP3D1, ADRA2C, AGRN, HCN4, HCN3, TUB…	78	0.00175986	2.75452
DG	Downregulated	GOTERM_CC_FAT	GO:0000139~Golgi membrane	CDIPT, NDST1, CLSTN3, LMAN2L, FGFRL1, CLSTN1, RGP1, CHPF2, SLC35A2, SLC35A4, MMP24, CANT1, POMGNT1, ST3GAL2, GBF1, XYLT2, ST3GAL5, CHST10, BOK, CHST15, A3GALT2, SCAMP5, DBNL, HYAL2, SCAMP3, CAMK1G, ZDHHC7, UBIAD1, CHST2, TMEM132A, CORO7, CHST5, GPER1, YIF1B, YIF1A, SCAP, RHBDD2, CHST1, MGAT1, MAN2A2, PITPNM1, MGAT3, CHST7, CHPF, GNAS, CLIP3, CUX2, GALNT9, PMEPA1, ABCA7, GALNT2, MFNG, ADORA2A, SLC…	96	0.000825947	3.08305
DG	Downregulated	GOTERM_CC_FAT	GO:0005912~adherens junction	CADM3, MPZL1, CADM4, SRCIN1, PDLIM7, CSPG4, RANGAP1, H1FX, TSPAN9, ATAT1, SND1, RPLP0, RRAS, SLC4A2, DBNL, DAB2IP, BSG, TWF2, BAIAP2, LYPLA2, EEF2, DLL1, AJAP1, MARK2, JUP, RND1, SCYL1, MAPK3, PDGFRB, HSPB1, TGFB1I1, NEURL2, DBN1, ADD1, SH3GL1, PPME1, PTK7, ITGA11, HSPA1A, ARF6, KEAP1, GIPC1, TAGLN2, SRC, PXN, SCRIB, ATP6V0C, PFN1, CDC42EP1, RPL6, RPL3, PABPC1, EMD, UNC45A, GIT1, P4HB, MAP2K2, SM…	143	0.000273659	3.56279
DG	Downregulated	GOTERM_CC_FAT	GO:0044432~endoplasmic reticulum part	CDIPT, SEC31A, TUSC3, HM13, CHERP, CYP2D4, LMAN2L, TTC9B, EIF5A, RCE1, VTN, DMPK, ELOVL1, TMEM147, PLOD1, GBF1, PLOD3, ATF6B, LRRC59, CREB3L1, RPN2, DDOST, AUP1, PLD3, TYRO3, PTPRN2, FA2H, SMIM14, ERP29, UBIAD1, STIM1, TMEM132A, YIF1B, TECR, YIF1A, POR, TMEM106C, PARP16, PITPNM1, TXNDC5, MLEC, AMFR, EXT2, ACHE, SYVN1, TMEM214, LMAN2, SERPINH1, G6PC3, TMEM178A, LPCAT1, SEC61A1, REEP6, SPPL3, SREBF…	177	0.000226908	3.64415
DG	Downregulated	GOTERM_CC_FAT	GO:0030426~growth cone	SNCB, PREX1, TRPV2, IGHMBP2, CXCR4, BOC, DSCAM, TWF2, STMN3, PTPRF, ARHGEF7, LIMK1, NECTIN1, STIM1, BASP1, SIGMAR1, CDK5, SMO, ZFYVE27, AMFR, DBN1, GAP43, MAP3K12, ORAI2, ORAI1, CDK5R1, FKBP4, KATNB1, TIMP2, INPP5J, RAC3, CRMP1, TOR1A, LRRTM1, AGRN, HAP1, AATK, PARD6A, FSCN1, RTN4R, CBARP, DPYSL3, WHRN, KIF3C, SIRT2, DVL1, CSNK1E, TSC2, PTCH1, TNK2, MAPK8IP1, ADGRL1, APBB1	53	0.000172808	3.76244
DG	Downregulated	GOTERM_CC_DIRECT	GO:0005765~lysosomal membrane	SLC44A2, HM13, HPS6, PLEKHM1, RAB5C, SIDT2, SLC26A11, STARD3, TMEM175, SLC2A8, DIRC2, MCOLN1, TM9SF1, VASN, FLOT1, ABCC10, RPTOR, GNB2, GAA, GNB4, NEU1, ARL8A, MFSD12, WDR41, STK11IP, ABCA2, ACP2, BORCS6, ITM2C, SLC11A2, ATP6V0C, SLC29A3, SLC48A1, ECE1, AP3D1, SCARB1, SLC30A3, SLC35F6, GBA, SPPL3, ABCB9, VPS18, SPNS2, SPHK2, ATRAID, SLC12A4, SPPL2B, TECPR1, ATP13A2, AP5B1, P2RX4, LAMP1, MARCH2, T…	59	3.03407e-05	4.51797
DG	Downregulated	GOTERM_CC_FAT	GO:0098794~postsynapse	KCNC4, SRCIN1, GRIK4, GRIK5, ITPKA, ADORA1, SH2D5, GRIN2C, GRIN2D, TMUB1, GNG3, GRID1, LRRC4, DBNL, BAIAP2, STRN4, PTPRO, FARP1, CRHR1, GABRR2, PPP1CA, HSPB1, DBN1, ADD2, NEURL1, ADD1, PALM, CDK5R1, ACHE, ADORA2A, GIPC1, CX3CL1, SCRIB, SRC, PRR7, LRFN1, AXIN2, LRFN3, LRFN2, GABRD, SYT11, FBXO2, GRIN1, SHANK1, SHANK3, CAMK2N1, DVL1, KCNJ4, P2RX4, CNIH2, HPCA, CHRNB2, NSMF, SYNGAP1, GRK2, DMTN, LZT…	110	7.64073e-06	5.11687
DG	Downregulated	GOTERM_CC_FAT	GO:0098793~presynapse	SEPT5, KCNC4, KCNC3, SNCB, SYT5, SYT3, GRIK4, GABBR1, GRIK5, LRRC4B, SYT9, SYNGR1, SYNGR2, ADORA1, SLC2A8, RABAC1, SYP, AP2B1, PACSIN1, TRIM9, SNPH, DLG4, SNAP47, LGI3, SV2A, CDK16, SCAMP5, PLD2, SVOP, STX1A, NRXN2, PTPRN2, PCDH8, GPER1, PTPRN, GRM4, GRM2, SEMA4C, C1QL1, RAB15, PEBP1, GNAS, VAMP2, VAMP1, BIN1, CLN8, EPN1, RAB3A, PPFIA3, CPLX2, RAB3B, ACHE, PPFIA4, CPLX1, ADORA2A, GIPC1, BCL2L1, B…	96	4.95389e-07	6.30505
DG	Downregulated	GOTERM_CC_FAT	GO:0030054~cell junction	KCNC3, SRCIN1, SYT5, GRIK4, LRRC4B, GRIK5, SYT9, SYP, PACSIN1, PRRT2, GRIN2C, GRIN2D, PRRT1, TMUB1, SAMD4A, GRID1, SCAMP5, DSCAM, LRRC4, DBNL, PTPRN2, BASP1, PTPRN, FARP1, GABRR2, MRPS18B, NEU1, VAMP2, VAMP1, IGSF9, SH3GL1, MPST, ABCA7, ACHE, ITGB4, BCL2L1, SCRIB, RIMS3, PRR7, ATN1, LRFN1, SLC30A3, AGRN, HAP1, LRFN3, LRFN2, GABRD, PARD6A, SYT11, GRIN1, SLC6A17, SHANK1, SHANK3, CAMK2N1, KDR, KCNJ4…	297	3.69658e-11	10.4322
DG	Downregulated	GOTERM_CC_FAT	GO:0045202~synapse	SNCB, SYT5, EFNA2, SYT3, SYT9, ADORA1, SYP, PRRT2, GRIN2C, GRIN2D, PRRT1, TMUB1, GNG3, GRID1, LRRC4, DBNL, PLD2, PTPRF, EFNB1, STRN4, PTPRN, PTPRO, FARP1, CRHR1, PPP1CA, RAB15, BIN1, DBN1, ADD2, MPST, ADD1, PALM, CDK5R1, CRTC1, BCL2L1, SCRIB, RIMS3, SLC32A1, PFN1, NPHP4, LAMB2, AGRN, HAP1, GIT1, FBXO2, DENND1A, KIF3C, SYNGR3, CAMK2N1, DVL1, KCNJ4, CNIH2, HPCA, NSMF, TPRG1L, CHRNB2, GRK2, LZTS1, W…	229	4.48781e-15	14.348
DG	Downregulated	GOTERM_CC_FAT	GO:0097458~neuron part	BTD, RANGAP1, WDR81, SYP, HTR1A, GRIN2C, RPLP0, GNG3, LRRC4, PTPRF, RXRA, PTBP1, PTPRN, PTPRO, MARK4, RPTOR, SSTR2, PPP1CA, SERPINF1, BACE1, ROR2, ORAI2, ORAI1, MOB2, GNAI2, CRTC1, ACP2, BCL2L1, SCRIB, PFN1, DAGLA, RAC3, PABPC1, TUBB4A, GIT1, RPSA, TAOK2, FXR2, KIF3C, SYNGR3, CAMK2N1, DVL1, KCNJ4, HPCA, TPRG1L, TNK2, SMURF1, GNAZ, ZFP385A, LZTS1, TRPV2, AP3S2, SNPH, SNAP47, DPP6, HTR5B, ARHGEF7, …	395	5.60648e-22	21.2513
DG	Downregulated	GOTERM_MF_DIRECT	GO:0043130~ubiquitin binding	NPLOC4, TOLLIP, USP5, RNF216, OTUB2, SIRT2, RHBDD2, ADRM1, CRY2, NUP62, SHARPIN, CXCR4, RAE1, OTUB1, SQSTM1, HGS, RBCK1, HSPB1, UBTD1, TP53INP2, MVB12B, AUP1, RNF31	23	0.0386402	1.41296
DG	Downregulated	GOTERM_MF_FAT	GO:0050321~tau-protein kinase activity	CSNK1D, GSK3A, BRSK2, BRSK1, CDK5, MARK4, MARK2	7	0.0385629	1.41383
DG	Downregulated	GOTERM_MF_FAT	GO:0048407~platelet-derived growth factor binding	PDGFB, PDGFA, COL3A1, COL1A2, PDGFRB, COL2A1, COL1A1	7	0.0385629	1.41383
DG	Downregulated	GOTERM_MF_FAT	GO:0043539~protein serine/threonine kinase activator activity	PARP16, SPRY2, CDK5R1, CDK5R2, FAM20A, MAP2K2, STRADA, IGF2, TGFB1	9	0.036767	1.43454
DG	Downregulated	GOTERM_MF_FAT	GO:0017147~Wnt-protein binding	FZD9, FZD8, SMO, SFRP2, FZD1, ROR2, FZD2, APCDD1, FRZB, PTPRO, PORCN, LRP5	12	0.0354266	1.45067
DG	Downregulated	GOTERM_MF_FAT	GO:0031625~ubiquitin protein ligase binding	HM13, UQCRC1, TOLLIP, UBE2G2, PINK1, RANGAP1, CKB, USP19, BAG4, BAG6, MAP1LC3A, BOK, CXCR4, CUL9, BTBD2, RALB, TUBB5, TUBA1B, RNF31, ANAPC2, SCAMP3, LTBR, EGR2, RELA, TP53, BTBD6, PIAS4, UBE2M, KCNH2, UBE2Z, ABTB2, ABTB1, UBE2V1, HSPA1A, CDC34, STUB1, TRIB2, ATP6V0C, HSPA1L, SQSTM1, BCL2, PER1, AXIN2, TRAF4, TRAF3, NPLOC4, SMAD7, DTX1, SYT11, TMBIM6, TRIM28, MUL1, SKI, AMBRA1, ZFP746, GGN, GPI, O…	60	0.0352233	1.45317
DG	Downregulated	GOTERM_MF_FAT	GO:0051020~GTPase binding	HPS6, WASF1, ATP6AP1, HPS4, RUSC2, VPS52, RANGAP1, MTSS1L, RGP1, ITPKA, RUNDC1, TBC1D13, ARHGEF16, PKN1, PTPRN, BICD2, DAPK3, FARP1, MYRIP, SGSM1, GNB2, RCC2, SGSM3, IPO4, RANGRF, BIN1, MAP3K11, SH3GL1, RAB3A, RAB3D, RAP1GAP, ADCYAP1R1, LLGL1, LLGL2, RABGGTA, PFN1, CDC42EP1, CDC42EP4, EHD1, CDC42EP3, ARHGDIA, ENO1, GIT1, PARD6A, DVL3, TBC1D10B, MYO1C, TBC1D10A, IPO13, DENND1A, ADPRH, DVL1, TBC1D2…	63	0.0334416	1.47571
DG	Downregulated	GOTERM_MF_FAT	GO:0004713~protein tyrosine kinase activity	STK16, FGFR1, FGFRL1, PTK7, EPHA10, EPHB3, EPHB4, SRC, EPHB1, CDC37, EPHB2, EPHB6, ZAP70, RALB, TIE1, CSK, AATK, TYRO3, SCAMP3, MAP2K2, FLT4, AXL, PKDCC, KDR, DDR1, STYK1, FYN, EPHA8, DYRK1B, LCK, TESK1, PDGFRB, TNK2	33	0.0257794	1.58873
DG	Downregulated	GOTERM_MF_FAT	GO:0015291~secondary active transmembrane transporter activity	SLC45A4, SLC6A1, SLC16A10, SLC6A20, SLC20A2, SLC45A1, SLC7A4, SLC7A5, SLC35A2, SLC26A11, SLC35A4, SLC1A4, SLC2A8, SLC2A6, SLC24A3, SLC1A6, SLC4A2, SLC4A3, SLC12A8, SLC12A9, SLC22A8, SLC7A10, SLC26A7, SLC41A1, SLC38A3, SLC2A10, MFSD3, SFXN3, SLC19A1, SLC11A2, SLC32A1, SLCO3A1, SLC8A2, SLC6A11, SLC12A4, SLC6A13, SLC6A17, ANKH, SLC10A3, SLC17A7, SLC16A2, SLC6A9, SLC6A8, SLC7A1, SLC25A10, SLC5A6, SLC…	52	0.00848145	2.07153
DG	Downregulated	GOTERM_MF_FAT	GO:0019902~phosphatase binding	PPME1, ELL, GRB2, ENSA, AKT1, RACK1, CRY2, VRK3, BCL2, PPP1R3G, DLG4, CSK, TRAF3, PIK3R2, KAT2A, PPP1R37, DAB2IP, IRS2, ANAPC5, FLT4, PTPA, PPP1R35, STRN4, SPTBN4, LMNA, TP53, PPP1R10, BAD, SLC9A3R1, SLC9A3R2, ELFN1, JUP, ELFN2, PPP1CA, MAST2, CSRNP2, MAPK14, LCK, MAPK3, TSC2, MYO16, CABIN1, TRPC4AP, SLC9A1, SH3GL1, TPRN	46	0.00637979	2.19519
DG	Downregulated	GOTERM_MF_FAT	GO:0046872~metal ion binding	CDIPT, CYP2D4, PLEKHM1, LTBP3, LTBP4, CIAPIN1, USP51, CDH22, PGP, BRPF3, CUL9, PATZ1, CDH24, RXRB, RXRA, ZNF48, RXRG, MARK2, NME4, ADAMTS7, PITPNM1, ADAMTS9, PITPNM2, PPP1CA, PITPNM3, PELO, ADAMTS4, PPP2R3B, GNAI2, DAGLA, LPCAT1, LFNG, GIT1, NPLOC4, ESRRA, CYP46A1, MAP2K2, KLF10, PCDH10, KLF16, GAS6, PCDH19, LASP1, HPCA, HGS, TNK2, RERE, CDC42BPB, DPP3, GNAZ, LIMA1, ZFP385A, RNPEPL1, RNF185, PDIA…	548	0.00574404	2.24078
DG	Downregulated	GOTERM_MF_FAT	GO:0019887~protein kinase regulator activity	CDK5R1, CDK5R2, RTN4RL1, FAM20A, STK11, LRRC4B, NCS1, GCN1L1, TGFB1, CDC37, CAMKK2, RACK1, SPRY2, ANKRD54, CDKN2C, LRRTM1, SPRED2, H2AFY, RTN4RL2, AGAP2, LRRC4, FLRT1, HYAL2, MAP2K2, SOCS1, PKIG, CSNK2B, STRADA, RTN4R, IGF2, CAMK2N2, RPTOR, CAMK2N1, GAS6, CDKN1C, PARP16, CCND1, BGN, PRKAR1B, RGCC, MAPK8IP2, HSPB1	42	0.00267646	2.57244
DG	Downregulated	GOTERM_MF_FAT	GO:0046982~protein heterodimerization activity	HIST2H2AA3, THRA, PDGFB, PDGFA, SYT5, SYT3, TGFB3, DLK2, ADORA1, TGFB1, GSTM1, HIST1H2BO, BAK1, HIST1H2BK, H2AFY, RARA, H2AFX, TYRO3, RXRB, RELA, RXRA, SCUBE1, IL11RA1, HMG20B, TAF6L, NTSR2, VEGFB, JUN, BIN1, EXT2, ADD2, ADD1, ADORA2A, PANX2, TFE3, SOX2, TFEB, KATNB1, BCL2L1, SOX9, PEF1, OAZ1, TEF, ADRA2C, TCF4, TCF3, P4HB, DVL3, TAF6, EPAS1, SYT10, GRIN1, FXR2, FOXP4, WHRN, USF1, ABCG1, USF2, NO…	111	0.00217629	2.66228
DG	Downregulated	GOTERM_MF_FAT	GO:0046873~metal ion transmembrane transporter activity	KCNC1, JPH3, KCNC4, KCNC3, TUSC3, SLC6A1, SLC20A2, SLC6A20, ATP1B2, TRPV2, NCS1, KCNK13, KCNJ12, KCNIP2, KCNK12, KCNJ11, KCNJ14, TMEM175, SLC24A3, SLC25A28, MCOLN1, KCNQ2, KCNG4, KCNG1, KCNG2, SLC12A9, SCN2B, KCND1, CACNG8, CACNG7, TMEM38A, STIM1, CACNG4, CACNG2, SLC41A1, KCNH2, KCNH3, ORAI2, ORAI1, SLC39A11, SLC39A13, CACNB1, CACNB3, SLC11A2, SLC32A1, SLC39A7, PKD1, SLC30A3, RASA3, KCNE5, HCN4, …	87	0.00174616	2.75792
DG	Downregulated	GOTERM_MF_FAT	GO:0008270~zinc ion binding	THRA, PDLIM7, QPCTL, LMO4, LNX2, PDLIM3, USP51, FNTB, TRIM46, IGHMBP2, BRPF3, CUL9, TRIM45, RBCK1, RARA, CYHR1, RNF31, RARG, CIZ1, RXRB, MTA2, RXRA, TRIM41, RXRG, MTA1, ZFP593, ADAMTS7, TRIM35, ADAMTS9, KDM2B, ZFP598, PIAS4, MIB2, PYGO2, TGFB1I1, RNF26, AMFR, CAR6, ADAMTS4, NEURL1, SYVN1, ZFAND3, AMZ2, ANAPC11, CXXC5, PXN, RABGGTA, NR1H2, SLC11A2, LHX2, RNFT2, TRAF7, RNF167, THAP11, TRAF4, UNKL, …	193	0.00131132	2.88229
DG	Downregulated	GOTERM_MF_FAT	GO:0000989~transcription factor activity, transcription factor binding	PPARD, HR, MED24, DMAP1, CBFA2T3, AIP, WBP2, MAGED1, MAMSTR, TAF5L, WNT4, AES, CRY2, PRMT2, PBXIP1, WWP2, SMARCD3, MED26, SND1, WDR77, RARA, SOX17, MKL1, SERTAD2, PSMD9, SOX10, HYAL2, CTBP1, RCOR2, RXRB, MTA2, SOX11, SOX12, MTA1, PKN1, TLE1, BASP1, HES6, TLE2, TAF6L, JUNB, PRDM8, JUP, ASCL1, TAF10, CCND1, PIAS4, MED15, MED16, JUN, NAB2, MED9, USP21, MAP3K10, PYGO2, TGFB1I1, CARM1, TADA3, HDGF, HC…	98	0.00130722	2.88365
DG	Downregulated	GOTERM_MF_FAT	GO:0000982~transcription factor activity, RNA polymerase II core promoter proximal region sequence-specific binding	FOXK2, NFKB2, ZIC1, GLI2, ZIC2, IGHMBP2, FOS, HSF1, CREB3L1, SOX18, PATZ1, NFIL3, EGR1, SSBP4, SSBP3, EGR2, RELA, SOX11, OTX1, SOX12, RELB, TP53, ZFP467, DDN, JUNB, HES1, ASCL2, ASCL1, MSX1, BTG2, HES5, JUN, CUX2, ZFPM1, TFAP2C, STK16, CAMTA1, CAMTA2, NDN, GLIS2, TFE3, SOX2, TFEB, HDGF, ELK1, SOX9, SRF, NR1H2, NR1D1, BCL11B, BCL11A, TEF, ZFP219, POU3F2, CC2D1A, TCF4, NFATC2, TCF3, NFATC1, SREBF1,…	81	0.0012608	2.89935
DG	Downregulated	GOTERM_MF_FAT	GO:0042802~identical protein binding	OXA1L, CADM3, NOG, CADM4, HM13, ATG101, SYT3, NELL2, SYT9, AMOTL2, SYP, GOT2, BAK1, ABCB10, NUDT16, DAB2IP, RXRB, OLFML2B, PTPRO, VEGFB, HES1, SERPINF2, JUN, BIN1, EXT2, ADD2, MPST, SH3GL1, ADD1, ORAI1, HSD17B10, PRRC1, BCL2L1, BANF1, EPHB2, GPD1L, NAGA, TCF4, TCF3, HAP1, SPPL3, BMP4, GIT1, SSSCA1, S100A16, TREX1, TKT, FXR2, USF1, USF2, ABCG1, DVL1, EMILIN1, TMEM115, DESI1, TPRG1L, BEGAIN, TNK2, …	244	0.000161601	3.79155
DG	Downregulated	GOTERM_MF_FAT	GO:0016301~kinase activity	MOK, FAM20A, FAM20C, FGFRL1, AURKB, ITPKA, DMPK, MAGED1, PSKH1, CDKN2C, COQ8B, COQ8A, RALB, RBCK1, ITPK1, TYRO3, SCAMP3, TWF2, CSNK1G2, PKIG, TBRG4, PIM3, WNK2, PIM2, MARK4, MARK2, NME4, NME3, SCYL1, MAPK3, TESK1, NEK8, PDGFRB, ROR2, MVK, MAPK7, STK16, FGFR1, COASY, CDK5R1, STK11, MAPKAPK3, PTK7, EPHA10, MAPKAPK2, EPHB3, SOX9, EPHB4, SRC, CDC37, EPHB1, EPHB2, CAMKV, EPHB6, VRK3, SBK1, TTBK1, ZAP7…	172	5.57934e-06	5.25342
DG	Downregulated	GOTERM_MF_FAT	GO:0019899~enzyme binding	HM13, ATP1B2, PPP2R5A, U2AF2, RUSC2, ADCY6, NELL2, VPS52, PTPN23, PGAM1, RANGAP1, XRCC1, GOT2, DIRAS1, RUNDC1, CRY2, CUL9, BTBD2, H2AFY, H2AFX, RARA, FIZ1, ANAPC2, PPP1R37, PLD2, DAB2IP, ANAPC5, PTPRF, RCOR2, RXRA, PPP1R35, STRN4, BTBD6, PTPRN, FARP1, RPTOR, PARP16, HES1, JUP, PPP1CA, RCC2, PIAS4, SERPINF2, RFC2, JUN, MLEC, MAPK3, PEX26, BACE1, RGCC, PDGFRB, MAPK7, AMFR, BIN1, ADAMTS4, SH3GL1, CD…	373	2.81652e-10	9.55029
DG	Downregulated	KEGG_PATHWAY	rno05210:Colorectal cancer	APC2, TP53, TGFB3, BAD, TGFB1, TCF7L1, RALGDS, AKT1, FOS, CCND1, CASP9, BCL2, BAX, JUN, MAPK3, AXIN2, AKT2, PIK3R2	18	0.0374033	1.42709
DG	Downregulated	KEGG_PATHWAY	rno01130:Biosynthesis of antibiotics	TM7SF2, HSD17B10, TALDO1, MVD, PGAM1, HK1, RCE1, FNTB, GOT2, PKM, ISYNA1, PGP, IDH2, ENO2, ENO1, BCKDHA, ALDOART2, SHMT2, ACO2, PFKL, SDSL, AK3, FDPS, TKT, ICMT, AMPD2, PCK2, NME4, GPI, ALDH7A1, AMDHD2, PYCR2, PGLS, NME3, HMGCS2, SDHC, PGM1, SDHD, ALDH2, PHGDH, MVK, PCCB, OAT, MDH2, CBS	45	0.0361647	1.44172
DG	Downregulated	KEGG_PATHWAY	rno04724:Glutamatergic synapse	ADCY3, SLC38A3, GNAI2, GRIK4, ADCY6, GRIK5, GRIN2C, GRIN2D, SLC1A6, DLG4, GNG3, PLD2, DLGAP1, GNAO1, GRIN1, PRKCG, SHANK1, SHANK3, SLC17A7, GRM4, GRM2, GNB2, MAPK3, GNB5, GNB4, GNAS, GRK2, CACNA1A	28	0.0287736	1.54101
DG	Downregulated	KEGG_PATHWAY	rno00604:Glycosphingolipid biosynthesis - ganglio series	ST6GALNAC5, ST6GALNAC6, ST6GALNAC4, ST3GAL2, ST3GAL5, ST8SIA5, B4GALNT1, GLB1	8	0.0263668	1.57894
DG	Downregulated	KEGG_PATHWAY	rno04370:VEGF signaling pathway	SPHK2, MAP2K2, MAPKAPK3, PRKCG, MAPKAPK2, BAD, PXN, SRC, KDR, AKT1, CASP9, MAPK14, MAPK3, HSPB1, NOS3, NFATC2, SHC2, AKT2, PIK3R2	19	0.0135555	1.86788
DG	Downregulated	KEGG_PATHWAY	rno00510:N-Glycan biosynthesis	MGAT4B, B4GALT3, TUSC3, GANAB, MGAT5B, B4GALT2, ALG3, MAN1B1, MAN1C1, DOLK, MGAT1, MAN2A2, MGAT3, DAD1, DPM3, RPN2, DOLPP1, DDOST	18	0.00544614	2.26391
DG	Downregulated	KEGG_PATHWAY	rno04310:Wnt signaling pathway	NKD1, PPARD, WNT16, APC2, TCF7L1, WNT4, CAMK2B, SOX17, AXIN2, NFATC2, FBXW11, NFATC1, FZD9, WNT10A, FZD8, DVL3, WNT10B, CTBP1, VANGL1, CSNK2B, FZD1, TP53, PRKCG, FZD2, PORCN, DVL1, CTNNBIP1, CCND1, WNT7B, CCND3, SFRP2, CSNK1E, JUN, WNT9A, WNT7A, LRP5	36	0.004878	2.31176
DG	Downregulated	KEGG_PATHWAY	rno04330:Notch signaling pathway	KAT2A, DVL3, MFNG, CTBP1, APH1A, DTX1, DTX2, DTX3, JAG2, DLL1, RFNG, DVL1, NUMBL, NOTCH3, HES1, NOTCH1, HES5, LFNG, NCOR2	19	0.00358378	2.44566
DG	Downregulated	KEGG_PATHWAY	rno04390:Hippo signaling pathway	PRKCZ, WNT16, APC2, SOX2, TGFB3, GLI2, SCRIB, LLGL1, TCF7L1, TGFB1, LLGL2, WNT4, DLG4, LIMD1, AXIN2, FBXW11, BMP4, ACTB, FZD9, PARD6A, DVL3, PPP2R1A, WNT10A, FZD8, WNT10B, FZD1, TEAD2, TEAD3, FZD2, DVL1, CCND1, WNT7B, YWHAG, PPP1CA, CCND3, CSNK1D, ID1, CSNK1E, WNT9A, WNT7A	40	0.00249914	2.60221
DG	Downregulated	KEGG_PATHWAY	rno05217:Basal cell carcinoma	BMP4, FZD9, FZD8, DVL3, WNT10A, WNT16, WNT10B, APC2, TP53, FZD1, FZD2, GLI2, TCF7L1, GLI1, DVL1, SMO, WNT7B, WNT4, PTCH1, WNT9A, AXIN2, WNT7A	22	0.000329135	3.48263
CA1	Upregulated	GOTERM_BP_FAT	GO:0071216~cellular response to biotic stimulus	ATG10, IL18, NFKBIA, TLR4, CPEB1, SGMS1, TLR6, BTK, B2M, ARG1, XBP1, ARG2, TICAM2, CFH, OGT, FCGR3A, ENTPD1, TIGAR, HAVCR2, MRC1, PTGER3, TNFSF4, LYN, CCDC47, SELENOS, STAT1, ZFP709, CD180, DDIT3, CD86, HIF1A, FCGR2B, CXCL16, FBXO18, TFPI, IL12A, RIPK2, JAK2, TREM2, TMCO1, PLAU	41	0.0498644	1.30221
CA1	Upregulated	GOTERM_BP_FAT	GO:0006298~mismatch repair	RPA1, HMGB1, RPA2, XPC, PCNA, TDG, PMS2, PMS1, RPA3	9	0.0479001	1.31966
CA1	Upregulated	GOTERM_BP_FAT	GO:0009451~RNA modification	NAF1, PUS3, RNMT, PUS10, QTRT2, TYW5, TRMT10C, WTAP, FDXACB1, DIMT1, TRMT6, TRMT5, TFB2M, NSUN2, NSUN4, RPUSD4, OSGEPL1, NOP10, BMT2, METTL14, NOP58, TFB1M, TRUB1, DUS4L, TRMT112, TRIT1	26	0.0456249	1.3408
CA1	Upregulated	GOTERM_BP_FAT	GO:0035058~nonmotile primary cilium assembly	TMEM67, BBS4, DYNLL1, IFT80, BBS7, CEP126, CCDC13, CC2D2A, PIBF1, PCM1, SEPT7, CENPJ, ARL13B	13	0.0453133	1.34377
CA1	Upregulated	GOTERM_BP_FAT	GO:0007059~chromosome segregation	SMARCAD1, RAD51C, FAM96A, CEP57L1, SLF2, SLF1, TTK, CTCF, CPEB1, LATS1, RPS3, NDC1, ACTR3, CUL3, WAPL, FANCM, MEI4, NIPBL, CEP57, DDX3X, CENPC, VPS4B, STAG3, RAB11A, TLK2, TPR, STAG2, BUB3, HFM1, ESCO1, SETDB2, ANAPC4, SMC5, BRCA2, SMC6, PIBF1, CENPE, CDC26, SMC2, SMC3, ATM, SMC4, ATRX, PSMG2, TEX15, DIS3L2, ARL8B, SMC1A, NEK6	49	0.0419076	1.37771
CA1	Upregulated	GOTERM_BP_FAT	GO:0002250~adaptive immune response	NBN, LILRB3A, RT1-DB1, IL18, TLR4, TNFSF13, TLR6, BTK, B2M, MAP3K7, KLHL6, ERAP1, KDM5D, GAPT, ADGRE1, LYN, C4B, SERPING1, CTSS, DCLRE1C, SERPINB9, C1QB, CTSL, IL12A, RIPK2, CTSH, CR1L, THOC1, HMGB1, GPR183, C3, HFE, IL33, CD74, RT1-BB, FCER1G, RNF168, CD4, HAVCR2, PTPRC, TNFSF4, NDFIP1, DUSP22, MALT1, DENND1B, TFRC, FCGR2B, NEDD4, IRF7, C1RL, JAK2, HSPD1, FCGR2A	53	0.0369085	1.43287
CA1	Upregulated	GOTERM_BP_FAT	GO:0006605~protein targeting	SRP14, GRPEL1, MLPH, IL18, TIMM17A, RASL2-9, TLR3, TLR4, TLR7, PRDX1, SSR1, ACTR3, AP1S3, WDR75, GOLGA7, STARD7, PEX2, ZFYVE16, TIMM9, RAB23, RABGEF1, GOLGA1, RANBP1, RPL11, OGT, RAB6A, RANBP2, TPR, AP3B1, MYO6, NCF1, SRP54A, UGCG, VPS41, UBE2J2, TACC3, CDKL2, PMM2, TIMM21, GCC2, PBLD1, IMMP1L, RPAIN, SEC61B, ATG4C, IPO7, TRAPPC8, ITGB1BP1, TOMM20, TOMM22, SEC61G, ZFAND6, ARL6IP1, BID, RAB7A, MTX…	91	0.0366716	1.43567
CA1	Upregulated	GOTERM_BP_FAT	GO:0010604~positive regulation of macromolecule metabolic process	HMGN3, AIF1, NAA15, MED23, ZFP639, SGMS1, MED21, RAB1A, MAP3K7, PICALM, RNF219, ZFP90, PIK3CA, CEP290, DHX36, RPL12, OGT, CAB39, MAP2K6, TWIST1, STAG1, PIK3CG, TADA2A, ROCK2, PIK3CB, STRN3, MED14, TANK, MED19, SPAG9, RFC1, SCYL2, MTF2, F3, NPTN, EIF2AK2, NEK7, PPP2R3A, GCNT2, TAF9B, HFE, NFKBIA, TXN1, MYBL1, RIMS2, ARFGEF1, CD74, ARIH1, KRAS, RAC1, SUPV3L1, FBXO4, RCHY1, TIGAR, PLAG1, TRPC6, SUB1…	350	0.0275938	1.55919
CA1	Upregulated	GOTERM_BP_FAT	GO:0042542~response to hydrogen peroxide	IL18, IMPACT, BNIP3, TXN1, PRDX3, RPS3, ARG1, GPX1, CASP3, HMOX1, PPP2CB, CFH, PRKAA1, PDGFD, HBB, APEX1, GLRX, ZFP277, PDCD10, TRPC6, STK26, STAT1, SOD1, DDIT3, PLA2G4A, HIF1A, HDAC2, RIPK1, F3, ENDOG, AKR1B1, PCNA, MDM2, NFE2L2, HSPD1	35	0.0231669	1.63513
CA1	Upregulated	GOTERM_BP_FAT	GO:0061136~regulation of proteasomal protein catabolic process	GCLC, BBS7, UBE2V2, IL33, GPX1, ARIH1, SUMO1, XBP1, TAF9, WAC, TLK2, RCHY1, RNF14, USP14, RNF144B, GABARAPL2, FMR1, UFL1, PSMC6, PSMD14, SENP1, PSME1, UBE2K, PSME2, PSMC2, UCHL5, GLMN, MDM2, COMMD1, CHFR	30	0.0229548	1.63913
CA1	Upregulated	GOTERM_BP_FAT	GO:0006984~ER-nucleus signaling pathway	ATF4, ATG10, MBTPS2, PTPN2, NCK1, CCDC47, ERLIN1, EIF2A, SELENOS, NFE2L2, DDIT3, TMCO1	12	0.0186437	1.72947
CA1	Upregulated	GOTERM_BP_FAT	GO:0006984~ER-nucleus signaling pathway	ATF4, ATG10, MBTPS2, PTPN2, NCK1, CCDC47, ERLIN1, EIF2A, SELENOS, NFE2L2, DDIT3, TMCO1	12	0.0186437	1.72947
CA1	Upregulated	GOTERM_BP_FAT	GO:0019884~antigen processing and presentation of exogenous antigen	PSME1, FCGR2B, PSME2, RT1-DB1, CTSE, FCER1G, FCGR2A, RT1-BA, CD74, B2M, RT1-BB, AP3B1	12	0.0186437	1.72947
CA1	Upregulated	GOTERM_BP_FAT	GO:0006401~RNA catabolic process	POLR2G, CNOT8, ZC3HAV1, PNPT1, ERI1, CNOT7, POLR2D, CNOT6, NOCT, CNOT6L, RBM8A, RNASET2, LSM5, SUPV3L1, EXOSC8, UPF2, EXOSC9, MAGOH, MTPAP, SMG1, RNPS1, ETF1, HNRNPR, RNASEH2B, ATM, EIF4A3, UPF3B, PAPD4, PNRC2, DIS3L2, LRPPRC	31	0.0108059	1.96634
CA1	Upregulated	GOTERM_BP_FAT	GO:0034976~response to endoplasmic reticulum stress	CREBRF, ATG10, DERL1, COPS5, PDIA3, TMX4, TMX3, DNAJC10, UFC1, ERLEC1, CASP4, XBP1, UFM1, COL4A3BP, PPP2CB, USP14, AUP1, MBTPS2, PTPN2, CCDC47, ERLIN1, SELENOS, UBE2J2, DDIT3, UFL1, TMEM67, TXNDC12, ERP44, ATF4, ATXN3, PSMC6, SEC61B, DNAJB9, UBE2K, EIF2S1, NCK1, PSMC2, RNF139, UBXN8, NFE2L2, EIF2AK2, USP25, TMCO1	43	0.0072726	2.13831
CA1	Upregulated	GOTERM_BP_FAT	GO:0032647~regulation of interferon-alpha production	HAVCR2, HMGB1, IFIH1, ZC3HAV1, TBK1, IRF7, TLR3, TLR4, HSPD1, TLR7	10	0.00449252	2.34751
CA1	Upregulated	GOTERM_BP_FAT	GO:0016197~endosomal transport	VPS29, TGOLN2, RAB7A, RAB9A, SNX6, VIPAS39, SNX5, VPS54, ARFRP1, SNX16, SNX2, VPS53, VPS50, SNX4, HOOK1, PICALM, EVI5, ZFYVE16, VPS4B, VPS35, AP5M1, DOPEY1, RAB6A, SNAP25, KLHL20, ARL1, ALMS1, SNAPIN, VPS41, CD63, GCC2, DENND1B, EPS15, SPAG9, FCGR2B, SCYL2, RAB14, COMMD1, VAMP3, RAB13, VPS28, RAB10, VPS26A	43	0.00415533	2.38139
CA1	Upregulated	GOTERM_BP_FAT	GO:0006464~cellular protein modification process	PDP1, HCCS, AIF1, VKORC1L1, NAA15, NAA16, MED23, CLK1, MED21, BTK, CUL3, MAP3K7, CUL2, WDR75, ISG15, BTBD1, CLK4, PIK3CA, OGT, CAB39, TLK2, MAP2K6, CUL1, IBTK, PIK3CG, TADA2A, ROCK1, ROCK2, SKP1, SCYL3, UBE2J2, SPAG9, EIF2AK1, SCYL2, EIF2S1, EIF2AK2, HFE, ARFGEF1, ACP1, NAA35, ARIH1, KBTBD2, KBTBD4, NAA30, KBTBD3, RAC1, RCHY1, PPP2R2B, YEATS4, TGFBR1, JTB, DUSP22, PIBF1, PCNP, UBE2L3, ATM, AIDA, …	438	0.00382541	2.41732
CA1	Upregulated	GOTERM_BP_FAT	GO:0031647~regulation of protein stability	DERL1, ATP1B3, USP3, TAF9B, NAA15, NAA16, PRKDC, GOLGA7, SUMO1, KRAS, STX12, MORC3, XBP1, PEX2, SH3GLB1, VPS35, TAF9, FBXO4, PER3, TPR, CDC37L1, USP33, ELMOD1, KHDRBS1, GTPBP4, PDCD10, TADA2A, SUGT1, NCKAP1, COG3, SENP2, USP28, LAMP2, HDAC3, CCT4, PPIB, CDKN2AIP, CCT8, RNF139, MDM2, COMMD1, SIAH1, HSPD1, CHFR, CTSH	45	0.00328298	2.48373
CA1	Upregulated	GOTERM_BP_DIRECT	GO:0045454~cell redox homeostasis	GCLC, PDIA3, TMX4, GRXCR1, TMX3, DNAJC10, PRDX4, TXN1, PRDX3, SELENOS, TXNDC9, PRDX1, DDIT3, GPX1, ERP44, TXNDC12, ERO1B, KRIT1, DLD, NFE2L2, APEX1, GLRX	22	0.00327561	2.48471
CA1	Upregulated	GOTERM_BP_FAT	GO:0006457~protein folding	PTGES3, GRPEL1, VAPA, PDIA3, TMX4, FKBP3, TMX3, TTC9C, DNAJC10, PRDX4, FKBP1A, TXN1, CANX, CD74, B2M, ERO1B, SH3GLB1, PPIL4, PPIL3, PPIL6, RANBP2, CDC37L1, PPWD1, TBCE, PPIDL1, NKTR, ERP44, PFDN1, CCT4, EMC3, PPIB, PPID, PFDN5, CCT8, FKBP14, HSPD1, DNAJB4, DNAJB6	38	0.00240379	2.6191
CA1	Upregulated	GOTERM_BP_DIRECT	GO:0006511~ubiquitin-dependent protein catabolic process	CD2AP, ERLEC1, CUL3, CUL2, BTBD1, WWP1, VPS4B, TLK2, CUL1, RNF146, AUP1, USP1, ANAPC4, UBE2J2, SKP1, DDIT3, PSMA1, SEC61B, UHRF2, PSMA6, PSMA4, PSMA3, RNF139, NFE2L2, DERL1, GCLC, BBS7, HFE, UBE2V2, IL33, PSMA7, ARIH1, UBE2D3, KBTBD4, PSMB3, TAF9, RNF168, FBXO4, RCHY1, FBXO9, RNF14, NDFIP1, HACE1, PCNP, SELENOS, CDC26, UBE2L3, PSMC6, DNAJB9, CRBN, NEDD4, PSMC2, FBXO36, UBE2G1, DNAJC10, VPS37A, US…	37	0.0023359	2.63155
CA1	Upregulated	GOTERM_BP_FAT	GO:0008033~tRNA processing	PUS3, PUS10, QTRT2, TYW5, TRMT10C, FDXACB1, ADAT1, ZBTB8OS, TRMT6, TRMT5, RPP30, NSUN2, TPRKB, TSEN15, RPUSD4, DDX1, SSB, OSGEPL1, TRNT1, TRMT12, POP4, POP5, TRUB1, DUS4L, RPP40, TRMT112, TRIT1	27	0.00232806	2.63301
CA1	Upregulated	GOTERM_BP_DIRECT	GO:0060271~cilium morphogenesis	SNAP29, IQCB1, BBS4, SEPT2, CEP126, TMEM216, DYNC2LI1, OCRL, RAB1A, OFD1, ACTR3, NPHP3, DYNLL1, IFT20, RAB23, DYNC2H1, CEP290, CEP83, RPGR, IFT80, RPGRIP1L, ALMS1, CBY1, ARL6, PCM1, ARL3, TMEM67, FOPNL, POC1B, CEP162, CC2D2A, CFAP20, IFT81, IFT52, IFT88, SEPT7, IFT74, IQUB, ARL13B	39	0.00204707	2.68887
CA1	Upregulated	GOTERM_BP_FAT	GO:0048193~Golgi vesicle transport	TGOLN2, TRAPPC2B, VAPA, ATL2, VPS54, COPZ1, BET1, SNX2, RER1, RAB1A, CUL3, STX18, TRAPPC6B, COPB1, GOLGA1, BCAP29, DOPEY1, EXOC5, RAB6A, GOLGA5, TRIP11, KLHL20, ARL1, RABIF, MYO1B, VPS41, GCC2, ERGIC2, ARL3, COG3, EPS15, SCFD1, TRAPPC8, GOLPH3, CNIH4, USO1, RAB14, VAMP4, COMMD1, RAB10, TRAPPC3, COPE, TRAPPC2	43	0.00194971	2.71003
CA1	Upregulated	GOTERM_BP_FAT	GO:0051236~establishment of RNA localization	ENY2, XPO1, PNPT1, CPEB1, POLR2D, NXT2, NDC1, HNRNPA3, RBM8A, DDX25, RANBP1, TPR, KHDRBS1, DDX39A, CKAP5, MAGOH, HNRNPA2B1, FMR1, NXF1, HNRNPA1, ATM, SARNP, SENP2, EIF4A3, FYTTD1, TOMM20, THOC2, LRPPRC, THOC1		0.00174746	2.75759
CA1	Upregulated	GOTERM_BP_FAT	GO:0007049~cell cycle	ITGB3BP, CAST, RAD51C, XPO1, SEPT2, AIF1, TIPINL1, TTK, RPS27L, CD2AP, CUL3, MEI4, FNTA, VPS4B, STAG3, MTUS1, POC5, STAG2, HFM1, ORC3, ESCO1, GTPBP4, TADA2A, RBL2, ROCK2, STK26, ANAPC4, RRP8, PPP1CC, TACC3, PPP1CB, RNASEH2B, DDIT3, WEE1, NME6, NABP1, UHRF2, DCLRE1B, PRDM5, ARL8B, MCTS1, SEPT7, NEK6, BBS4, HMGB1, BLM, SLF2, SLF1, PNPT1, AHCTF1, ANLN, ANGEL2, CCNG1, SYCP2, TIPRL, WAPL, NIPBL, DDX3X…	187	0.00165467	2.78129
CA1	Upregulated	GOTERM_BP_FAT	GO:0000460~maturation of 5.8S rRNA	EXOSC8, EXOSC9, MAK16, ABT1, ERI1, WDR12, LAS1L, ERI2, MPHOSPH6, RPS21, FCF1, RPF1, NSA2, C1D	14	0.00161773	2.79109
CA1	Upregulated	GOTERM_BP_FAT	GO:0000460~maturation of 5.8S rRNA	EXOSC8, EXOSC9, MAK16, ABT1, ERI1, WDR12, LAS1L, ERI2, MPHOSPH6, RPS21, FCF1, RPF1, NSA2, C1D	14	0.00161773	2.79109
CA1	Upregulated	GOTERM_BP_FAT	GO:0060249~anatomical structure homeostasis	RAD51C, NBN, VPS54, TLR4, PRDX1, FLT3LG, B2M, WDR36, TPP1, CEP290, STK39, DHX36, CIB2, GNL3, CDH23, HNRNPA2B1, BBS12, CTSS, HNRNPU, RAD50, PBLD1, DCLRE1C, HIF1A, DCLRE1B, CFL2, CTSH, NEK7, IQCB1, RBP4, BBS4, RAB7A, GCNT2, BLM, STRAP, CYTL1, PRKDC, POT1, RPA1, RPA2, NPHP3, KRAS, RAC1, FBXO4, SLC28A2, APEX1, TERF2, SPATA7, LIPA, SMC5, BRCA2, SMC6, SMG1, SOD1, NOP10, HNRNPA1, ATM, ATRX, LAMP2, PLA2G…	66	0.000350019	3.45591
CA1	Upregulated	GOTERM_BP_FAT	GO:0032200~telomere organization	RAD51C, NBN, BLM, PRKDC, POT1, RPA1, RPA2, DHX36, FBXO4, APEX1, TERF2, GNL3, HNRNPA2B1, SMC5, SMG1, SMC6, BRCA2, HNRNPA1, NOP10, RAD50, HNRNPU, ATM, DCLRE1C, ATRX, CCT4, DCLRE1B, CCT8, PCNA, NEK7	29	0.000188661	3.72432
CA1	Upregulated	GOTERM_BP_FAT	GO:0051276~chromosome organization	ITGB3BP, RAD51C, HMGN3, TTK, MBIP, CUL3, MAP3K7, WDR75, KDM1A, MEI4, MIER1, VPS4B, STAG3, DHX36, TLK2, OGT, DNAJC2, STAG2, TWIST1, GNL3, ESCO1, TADA2A, RBL2, ROCK2, DTX3L, FMR1, HNRNPA2B1, ANAPC4, RRP8, SKP1, HNRNPU, DCLRE1C, SUZ12, CHRAC1, UHRF2, DCLRE1B, ASCC3, MTF2, FBXO18, PRDM5, SMARCA5, SMARCA1, NEK6, NEK7, EID1, TDRD3, HMGB1, HMGB3, BLM, SLF2, SLF1, TAF9B, TADA1, WAPL, VRK1, NIPBL, DDX3X, …	159	0.000188224	3.72532
CA1	Upregulated	GOTERM_BP_FAT	GO:0090305~nucleic acid phosphodiester bond hydrolysis	POLA1, DDX1, RAD50, DNASE1L1, RBBP8, N4BP2, DCLRE1C, FANCM, DCLRE1B, TDP2, REXO2, POLN, ZRANB3, REV3L	49	0.000140571	3.85211
CA1	Upregulated	GOTERM_BP_FAT	GO:0043603~cellular amide metabolic process	RPL36A, RPL19, PSTK, CNDP1, ATP6AP2, RBM3, IMPACT, RPL15, RPS27L, SGMS1, CNOT6, EIF4EBP3, RSL1D1L1, PICALM, SLC25A24, RBM8A, COL4A3BP, DDX25, ST3GAL6, ERAP1, RPL11, EIF1, PUM2, RPL12, MRPL32, EIF2B3, RPS27A, RMND1, MRPL35, FECH, DARS, MAGOH, FMR1, UGCG, HNRNPA2B1, EIF2S3, HNRNPR, SLC25A32, EIF2AK1, MRPS18C, MRPS18A, EIF2S1, RPS14, DLD, ARXES2, EIF2S2, HSD11B1, RNF139, RPS11, NFE2L2, EIF2AK2, NEU3…	171	8.25398e-05	4.08334
CA1	Upregulated	GOTERM_BP_FAT	GO:0006302~double-strand break repair	SMARCAD1, RAD51C, NBN, PPP4R2, BLM, SLF2, SLF1, POLA1, PRKDC, DEK, UBE2V2, RPA3, RPA1, RPA2, KDM1A, SFR1, SWI5, NSMCE1, POLN, SPIDR, RNF168, TWIST1, DTX3L, SMC5, DDX1, SMC6, BRCA2, SOD1, ATM, RAD50, UIMC1, RBBP8, DCLRE1C, UBE2N, NABP1, PSMD14, DCLRE1B, TEX15, RIF1, PARP9, TDP2, FBXO18, SMARCA5	43	7.51009e-05	4.12436
CA1	Upregulated	GOTERM_BP_FAT	GO:0070647~protein modification by small protein conjugation or removal	MED23, MED21, CUL3, KDM1A, CUL2, G2E3, ISG15, BTBD1, WWP1, RABGEF1, OGT, CUL1, RNF146, GNL3, GTPBP4, USP1, DTX3L, ANAPC4, UBE2J2, SKP1, TANK, SUZ12, DCUN1D1, UHRF2, FBXO18, RNF139, RIPK2, NFE2L2, DCUN1D4, FBXO11, IFIH1, GCLC, DERL1, ANAPC13, HFE, UBE2V2, ARIH1, KBTBD2, UBE2D3, UBE2D2, KBTBD4, KBTBD3, TRIM69, HECTD2, RNF168, FBXO4, FBXO3, RCHY1, FBXO9, RNF14, RNF13, SHPRH, TGFBR1, NDFIP1, HACE1, P…	139	2.63132e-05	4.57983
CA1	Upregulated	GOTERM_BP_FAT	GO:2001020~regulation of response to DNA damage stimulus	BID, ARMT1, HMGB1, PPP4R2, BLM, SLF2, SLF1, DEK, UBE2V2, MTFR2, CD74, RPS3, ERCC8, RPA2, KDM1A, HNRNPK, MTCH2, NSMCE1, TPT1, PARG, FBXO4, RNF168, SPIDR, APEX1, TWIST1, TIGAR, CEBPG, USP1, FMR1, SMYD2, RNASEH2B, ATM, UIMC1, SENP2, UBE2N, RFWD3, TEX15, NSMCE4A, RIF1, FBXO18, EEF1E1, PCNA, MDM2, THOC1	44	1.12082e-06	5.95046
CA1	Upregulated	GOTERM_BP_FAT	GO:0006413~translational initiation	POLR2G, EIF4E3, IMPACT, EIF2A, POLR2D, MTIF2, EIF4EBP3, DDX3X, EIF1, EIF3J, TPR, HBB, EIF2B3, EIF3M, KHDRBS1, ABCE1, FECH, EIF2S3Y, PAIP2, FMR1, EIF2S3, SSB, DENR, EIF1A, ATF4, EIF2AK1, RPL13A, EIF4A2, EIF2S1, NCK1, EIF2S2, EIF4A1, EIF2AK2, EIF5A2, YAE1D1, MCTS1	36	4.07063e-07	6.39034
CA1	Upregulated	GOTERM_BP_FAT	GO:0008380~RNA splicing	SRSF1, PRPF4B, LSM8, ZFP638, CWC15, ZMAT2, RBM7, HNRNPLL, WTAP, WBP4, YBX1, SMNDC1, KDM1A, RBM8A, RNF219, LSM5, PSIP1, LUC7L2, LSM3, DDX20, RBM11, TSEN15, DDX39A, CLNS1A, KHDRBS1, SRPK2, RBM41, MAGOH, HNRNPA2B1, FMR1, PRPF39, PRPF3, EIF4A3, SNRPE, THOC1, SRSF10, STRAP, TRA2B, SRSF12, TRA2A, HNRNPA3, SF3B1, ZBTB8OS, CIR1, HNRNPK, SCAF11, HTATSF1, HNRNPF, DHX15, PPIL3, SCNM1, MTERF4, GEMIN6, PRPF40…	72	5.06934e-08	7.29505
CA1	Upregulated	GOTERM_BP_FAT	GO:0044085~cellular component biogenesis	HCCS, NAF1, AIF1, CUL3, MAP3K7, MAK16, BHLHB9, VPS4B, LUC7L2, LSM3, RPL11, RPL12, OGT, CAB39, TBPL1, PLS3, TMEFF2, KRR1, ROCK1, ROCK2, EIF2S3, VPS41, PCM1, SPAG9, TRAPPC8, RPS14, EIF2AK2, UNC13C, MCTS1, AHCTF1, ARFGEF1, ARG1, RPS27, RPS28, RAC1, RPS21, TGFBR1, PIBF1, RPS5, VDAC3, GCFC2, RPS8, ATM, RGS2, SRSF6, TSGA10, H3F3C, POP4, RTN4, SRSF1, RT1-DB1, NAP1L1, EIF2A, NAP1L3, LATS1, RT1-DA, NOCT, …	388	3.207e-08	7.4939
CA1	Upregulated	GOTERM_BP_FAT	GO:0033036~macromolecule localization	NAF1, HMGN3, SYT4, ATP1B3, VAPA, VPS54, RASL2-9, VPS50, CD2AP, ERLEC1, RAB1A, TVP23B, SSR1, WDR75, MALL, PICALM, IFT20, RBM8A, COL4A3BP, RAB23, DYNC2H1, VPS4B, STAG3, CEP290, RPL11, OGT, MAP2K6, TWIST1, AUP1, ROCK1, NCF1, ROCK2, SRP54A, VPS45, UGCG, VPS41, UBE2J2, PCM1, GCC2, NME7, NPC2, RAB18, TRAPPC8, CC2D2A, RAB14, NPTN, RAB13, RAB10, CLEC5A, RBP4, CRIPT, MTX2, HFE, NFKBIA, RER1, TXN1, RIMS2, …	375	1.2412e-08	7.90616
CA1	Upregulated	GOTERM_BP_FAT	GO:0006259~DNA metabolic process	RAD51C, TIPINL1, RPS27L, TNFSF13, DNASE1L1, PRIM1, KDM1A, MEI4, PRIM2, ORC4, PMS2, PIK3CA, ORC5, ORC6, DHX36, PDGFC, DNAJC2, PMS1, STAG2, ORC2, HFM1, ORC3, GNL3, TWIST1, POLK, ESCO1, GTPBP4, POLI, NUDT1, USP1, DTX3L, HNRNPA2B1, TATDN1, HNRNPU, DCLRE1C, NABP1, UHRF2, RPAIN, DCLRE1B, RFC1, ASCC3, FBXO18, SMARCAL1, SMARCA5, BIVM, XRN2, NEK7, HMGB1, BLM, SLF2, SLF1, UBE2V2, WAPL, UBE2D3, POLE3, RAC1,…	153	9.20954e-09	8.03576
CA1	Upregulated	GOTERM_BP_FAT	GO:0044265~cellular macromolecule catabolic process	SCPEP1, CNOT8, ZC3HAV1, CNOT7, CD2AP, CNOT6, ERLEC1, DNASE1L1, CUL3, CUL2, ISG15, BTBD1, RBM8A, WWP1, LSM5, VPS4B, TLK2, RNF146, CUL1, AUP1, MAGOH, USP1, FMR1, ANAPC4, MTPAP, SKP1, UBE2J2, TATDN1, HNRNPR, RNASEH2B, DDIT3, PSMA1, UHRF2, SEC61B, PSMA6, PSMA4, FBXO18, PSMA3, RNF139, NFE2L2, XRN2, LRPPRC, RAB7A, GCLC, DERL1, BBS7, PNPT1, HFE, UBE2V2, IL33, PSMA7, ARIH1, UBE2D3, KBTBD4, CNOT6L, PSMB3,…	159	1.0777e-10	9.9675
CA1	Upregulated	GOTERM_BP_FAT	GO:0016071~mRNA metabolic process	RNMT, PRPF4B, CNOT8, LSM8, AURKAIP1, ZC3HAV1, RBM7, CNOT7, WTAP, CNOT6, SMNDC1, KDM1A, RBM8A, RNF219, LSM5, PSIP1, LUC7L2, LSM3, DDX20, RBM11, CLNS1A, DDX39A, MAGOH, HNRNPA2B1, FMR1, MTPAP, CSTF2T, HNRNPR, PCF11, SNRPE, TDRD3, SRSF10, STRAP, SRSF12, PNPT1, HNRNPA3, HNRNPK, CNOT6L, HNRNPF, HTATSF1, PPIL3, SUPV3L1, PRPF40A, ZC3H14, CSTF3, LGALS3, DDX1, SAP18, SMG1, RNPS1, HNRNPA1, RBMX, GCFC2, ATM,…	107	4.17927e-11	10.3789
CA1	Upregulated	GOTERM_BP_FAT	GO:0022613~ribonucleoprotein complex biogenesis	XPO1, NAF1, FASTKD2, RASL2-9, RPS27L, CNOT7, CNOT6, RSL1D1L1, MAK16, PSIP1, LUC7L2, TFB2M, RPL11, LSM3, DDX20, PUM2, RPL12, GNL3, CLNS1A, KRR1, GTPBP4, EIF2S3, RRP8, ABT1, RPS14, TFB1M, MCTS1, SNRPE, SRSF10, STRAP, SRSF12, RPS27, RPS28, RPL7, DDX3X, CNOT6L, BRIX1, RPL5, TAF9, MTERF4, EIF3J, RPL10A, RPS21, EIF3M, TSR1, RPL23A, DENR, RPS5, NOP10, RPF2, RBMX, RPF1, GCFC2, RPS8, ATM, SRSF6, POP4, UTP…	109	2.2421e-12	11.6493
CA1	Upregulated	GOTERM_BP_FAT	GO:0010467~gene expression	NAF1, RPL19, AURKAIP1, LSM8, AIF1, RPL15, NAA15, ASCC1, MED23, SGMS1, CLK1, WTAP, MED21, MXI1, MAP3K7, CUL3, WDR75, CDCA7, MED28, MAK16, CLK4, LSM5, LUC7L2, RPL11, DHX36, LSM3, OGT, RPL12, TBPL1, STAG1, KRR1, TADA2A, PIK3CB, ROCK2, ZHX1, MTPAP, EIF2S3, MED14, SERPING1, MED19, EIF2AK1, DHX29, ZFP280C, ASCC3, EIF2S1, F3, ZFP280D, RPS14, ARXES2, SMARCAL1, EIF2S2, RPS11, ST18, EIF2AK2, MCTS1, GATB, T…	703	7.01749e-21	20.1538
CA1	Upregulated	GOTERM_MF_FAT	GO:0044389~ubiquitin-like protein ligase binding	UBE2G1, CUL3, CUL2, PRKAR2B, BLZF1, MAP1LC3B, BTBD1, CUL1, UBE2A, LYN, UBE2F, ERLIN1, UBE2J2, HLTF, TANK, UBE2N, CCDC50, HIF1A, UBE2K, RIPK1, MDM2, USP25, LRPPRC, BID, DERL1, SLF2, SLF1, RRAGA, NFKBIA, UBE2V2, RT1-BB, ARIH1, RPA2, SUMO1, KBTBD4, XBP1, PER3, GABARAPL2, TRIP4, SHPRH, TGFBR1, SMC6, UBE2L3, FZD4, GABARAP, ATXN3, GLMN, CUL4B, HSPD1, MPHOSPH8	50	0.0388603	1.41049
CA1	Upregulated	GOTERM_MF_FAT	GO:0070717~poly-purine tract binding	KHDRBS1, ZC3H14, EIF4A3, DDX3X, TRA2B, PNPT1, FMR1, DDX1, HNRNPU	9	0.0163506	1.78647
CA1	Upregulated	GOTERM_MF_FAT	GO:0070717~poly-purine tract binding	KHDRBS1, ZC3H14, EIF4A3, DDX3X, TRA2B, PNPT1, FMR1, DDX1, HNRNPU	9	0.0163506	1.78647
CA1	Upregulated	GOTERM_MF_FAT	GO:0070717~poly-purine tract binding	KHDRBS1, ZC3H14, EIF4A3, DDX3X, TRA2B, PNPT1, FMR1, DDX1, HNRNPU	9	0.0163506	1.78647
CA1	Upregulated	GOTERM_MF_FAT	GO:0004518~nuclease activity	RAD51C, CNOT8, PNPT1, POLA1, ERI1, CNOT7, CNOT6, NOCT, DNASE1L1, RPS3, N4BP2, FANCM, CNOT6L, RNASET2, REXO2, RPP30, POLN, APEX1, TSEN15, EXOSC8, EXOSC9, RNASE4, DDX1, TATDN1, RNASEH2B, RAD50, RBBP8, TEFM, DCLRE1C, DCLRE1B, TDP2, ENDOG, DIS3L2, POP4, BIVM, ZRANB3, POP5, RPP40, XRN2, REV3L	40	0.00893871	2.04873
CA1	Upregulated	GOTERM_MF_FAT	GO:0008234~cysteine-type peptidase activity	COPS5, USP3, USP9X, COPS4, SENP7, SENP6, CASP3, USP18, CASP4, CASP1, USP34, USP33, USP15, MYSM1, USP14, STAMBP, CAPN7, USP40, UFSP2, USP1, MALT1, CTSS, TANK, SENP2, CTSL, USP28, BLMH, ATXN3, SENP1, ATG4C, UCHL5, UCHL3, USP48, USP25, PDCD6, CTSH, USP45	37	0.00546033	2.26278
CA1	Upregulated	GOTERM_MF_DIRECT	GO:0000166~nucleotide binding	RAD51C, ZFP638, RASL2-9, CLK1, UXS1, NMRK1, HIBADH, RAB1A, BTK, MAP3K7, RAB28, RBM8A, SULT1A1, OASL2, CLK4, RAB23, DYNC2H1, VPS4B, PIK3CA, DHX36, DDX10, TLK2, MAP2K6, HFM1, GTPBP4, ROCK1, ROCK2, SRP54A, SUCLG2, PIK3CB, MTPAP, OLA1, EIF2S3, SCYL3, NME7, NME6, EIF2AK1, RFC1, DHX29, RAB18, SCYL2, ASCC3, ABT1, PARP14, DLD, SMARCAL1, RAB14, HSD11B1, ARL8B, RAB13, RAB10, EIF2AK2, NEK6, GATB, NEK7, ADSS…	60	0.00385418	2.41407
CA1	Upregulated	GOTERM_MF_DIRECT	GO:0046872~metal ion binding	PDP1, SYT4, ZFP637, PTGS1, ZFP639, NMRK1, ZFP472, OASL2, ZFP90, NT5C2, PRIM2, ZFP329, NUDT12, ROCK1, SUCLG2, ROCK2, ZHX1, OLA1, COLEC12, ZUFSP, ZFP78, NME7, NME6, ZFP280C, ZFP280D, PRDM5, UNC13C, NEK7, ENPP5, ERMP1, MOB4, RIMS2, ZFP458, ACAT1, ZFP455, ZFP780B-PS1, RPS27, PIR, ARG2, ZFP958, DHX57, PLAG1, ZC3H14, IKZF5, ZC3H15, TGFBR1, ZFP449, ZBTB41, SMYD2, ZFP445, ZFP606, RPE, PON2, PPP2R3C, ZFP4…	196	0.00207642	2.68268
CA1	Upregulated	GOTERM_MF_DIRECT	GO:0003924~GTPase activity	RAB7A, SEPT2, RAB3C, RAB9A, ATL2, RASL2-9, GTPBP10, RRAGA, MTIF2, RRAGD, RAB1A, RRAGC, KRAS, DDX3X, RAB28, RAC1, RHOA, RAB23, RAB11A, GUF1, RAB6A, MX2, ARHGDIB, GNL3, ARL1, GTPBP4, MGC105567, EIF2S3Y, TSR1, SRP54A, EIF2S3, TRIM23, ARL3, MMAA, MFN1, GNGT2, GSPT1, RHOT1, RAB14, RAP1A, RAP1B, RAB13, RIT2, RAB10	44	0.00145149	2.83819
CA1	Upregulated	GOTERM_MF_FAT	GO:0004386~helicase activity	SMARCAD1, NBN, ERCC6L2, BLM, ERCC8, DDX3X, DDX25, DHX15, SUPV3L1, DHX36, DDX20, DDX10, DHX57, DDX39A, DHX9, SHPRH, DDX1, YTHDC2, RAD50, ATRX, EIF4A3, DHX29, ASCC3, EIF4A2, FBXO18, DDX59, SMARCAL1, EIF4A1, DDX50, DHX40, ZRANB3, DDX52	32	0.000227177	3.64364
CA1	Upregulated	GOTERM_MF_FAT	GO:0016779~nucleotidyltransferase activity	PTGES3, POLR2G, POLR2F, POLR2K, PNPT1, POLA1, POLR2D, PRIM1, GPHN, POLE3, OASL2, PRIM2, POLN, TWISTNB, EIF2B3, TERF2, POLR3G, POLR3F, POLK, POLI, CMAS, MTPAP, POLR3GL, POLR3C, TRNT1, PAPOLA, OAS1I, PAPD4, OAS1A, PAPOLG, FPGT, UGP2, REV3L	33	0.000217933	3.66168
CA1	Upregulated	GOTERM_MF_FAT	GO:0043021~ribonucleoprotein complex binding	IFIH1, RBM3, IMPACT, NAA15, NAA16, ERI1, EIF2A, CPEB1, MTIF2, HNRNPK, DDX3X, WDR12, GUF1, TOP2B, RPS21, NMD3, ABCE1, SRP54A, FMR1, OLA1, DENR, EIF1A, MRRF, HNRNPU, EIF4A3, SEC61B, DHX29, PTCD3, EIF2S1, MTRF1, NOP58, SPCS1, EIF5A2, SNRPE	34	0.000190152	3.7209
CA1	Upregulated	GOTERM_MF_FAT	GO:0000166~nucleotide binding	RAD51C, ZFP638, RASL2-9, CLK1, UXS1, NMRK1, HIBADH, RAB1A, BTK, MAP3K7, RAB28, RBM8A, SULT1A1, OASL2, CLK4, RAB23, DYNC2H1, VPS4B, PIK3CA, DHX36, DDX10, TLK2, MAP2K6, HFM1, GTPBP4, ROCK1, ROCK2, SRP54A, SUCLG2, PIK3CB, MTPAP, OLA1, EIF2S3, SCYL3, NME7, NME6, EIF2AK1, RFC1, DHX29, RAB18, SCYL2, ASCC3, ABT1, PARP14, DLD, SMARCAL1, RAB14, HSD11B1, ARL8B, RAB13, RAB10, EIF2AK2, NEK6, GATB, NEK7, ADSS…	319	2.79894e-05	4.55301
CA1	Upregulated	GOTERM_MF_FAT	GO:0003723~RNA binding	NAF1, FASTKD1, FASTKD2, RPL19, LSM8, ZFP638, RPL15, ASCC1, NAA15, PNISR, RSL1D1L1, WDR75, MAK16, RBM8A, OASL2, LSM5, LUC7L2, RPP30, RPL11, DHX36, LSM3, RPL12, DDX10, MRPL32, EIF2B3, CLNS1A, KRR1, RPUSD4, GTPBP4, ROCK2, SRP54A, MTPAP, EIF2S3, PCF11, DHX29, ASCC3, ABT1, RPS14, EIF2S1, EIF2S2, ATP5C1, RPS11, EIF2AK2, MCTS1, TDRD3, RALYL, PUS3, SRSF10, CHCHD1, PCDH20, SRSF12, SRSF11, NIFK, TXN1, MTIF…	357	1.80417e-39	38.7437
CA1	Upregulated	GOTERM_CC_DIRECT	GO:0031902~late endosome membrane	RAB7A, RT1-DB1, SNX16, SPPL2A, VPS41, MITD1, CD63, RT1-DA, TMEM106B, LAMP2, SLC30A4, ARL8B, AP5M1, LTV1, RNF13	15	0.047032	1.32761
CA1	Upregulated	GOTERM_CC_FAT	GO:0061695~transferase complex, transferring phosphorus-containing groups	CCNT2, TBP, PRDX3, PRIM1, MAP3K7, PRKAR2B, GTF2E2, PEX2, PRIM2, PIK3CA, TWISTNB, TBPL1, CHUK, PIK3CG, MYO6, PIK3CB, CCNH, PIK3C2A, MED14, CCNC, GTF2H1, MED6, TAF13, PRPS2, REV3L, POLR2G, POLR2F, POLR2K, TAF9B, POLA1, BCCIP, POLR2D, POLE3, RB1CC1, TAF9, PRKAA1, POLR3G, TAF2, POLR3F, TGFBR1, POLR3GL, INTS10, POLR3C, PRPSAP2, MNAT1, RPAP2, PCNA, HSPD1, URI1	49	0.0334602	1.47547
CA1	Upregulated	GOTERM_CC_DIRECT	GO:0000784~nuclear chromosome, telomeric region	NBN, LRIF1, BRCA2, PRKDC, CBX3, SSB, PPP1CC, PPP1CB, POT1, RAD50, DCLRE1C, RPA1, ATRX, RPA2, KDM1A, NABP1, DCLRE1B, PCNA, ORC4, ORC5, THOC2, ORC2, TERF2, ORC3, THOC1	25	0.0316145	1.50011
CA1	Upregulated	GOTERM_CC_DIRECT	GO:0000139~Golgi membrane	RAB9A, SLC35A1, RAB1A, RTN3, CUL3, ACTR3, BLZF1, MALL, B3GALNT1, COPB1, B3GALNT2, RAB6A, GOLGA5, APOO, EBAG9, HPD, ARL1, ROCK1, VPS45, UGCG, STK26, LPCAT2, ARL3, MGAT2, USO1, RAB14, WASL, TRAPPC3, TMCO1, SNAP29, MMGT1, BET1, ITM2B, ARFGEF1, STX12, STX18, SH3GLB1, RAC1, MANEA, RNF13, GABARAPL2, ICA1, PDCD10, B3GALT2, NDFIP1, HACE1, SCOC, SNAPIN, TRIM23, GABARAP, GOLPH3		0.0297712	1.5262
CA1	Upregulated	GOTERM_CC_DIRECT	GO:0032391~photoreceptor connecting cilium	IQCB1, BBS4, RPGR, SEPT2, IFT20, MYO7A, RPGRIP1L, CEP290, IFT52, TOPORS, IFT88, SPATA7, ARL3	13	0.0294989	1.53019
CA1	Upregulated	GOTERM_CC_DIRECT	GO:0036064~ciliary basal body	BBS4, TAPT1, BBS7, DYNC2LI1, CEP19, DAAM1, OFD1, RAB28, IFT20, CEP290, SPATA7, RPGR, BBOF1, RPGRIP1L, ALMS1, TOPORS, CBY1, PCM1, CENPJ, NME7, FOPNL, POC1B, CFAP20, IFT81, IFT88	25	0.0234207	1.6304
CA1	Upregulated	GOTERM_CC_FAT	GO:0044440~endosomal part	RT1-DB1, VPS37A, VPS53, VPS50, MITD1, RT1-DA, VPS4B, RAB23, AP5M1, SCAMP1, TM9SF2, SCAMP2, RAP2C, VPS45, VPS41, CD164, TMEM106B, RAB14, ARL8B, RAB13, WDR44, RAB10, VPS26A, LTV1, VPS29, RAB7A, MMGT1, SNX6, SNX5, SNX16, SNX2, RRAGA, SNX4, OCRL, RRAGD, ITM2B, RRAGC, UBE2D3, STX12, RAC1, SLC30A4, RAB11A, VPS35, RNF13, MRC1, LAMTOR5, MYO1B, NDFIP1, SPPL2A, CD63, LAMP2, TFRC, TOM1L1, VPS28, VPS25	55	0.0067817	2.16866
CA1	Upregulated	GOTERM_CC_FAT	GO:0016604~nuclear body	SRSF1, CREBRF, XPO1, NBN, WTAP, WBP4, MTFR2, SMNDC1, CASP8AP2, RBM8A, SRRM2, RBM11, KLHL20, SRP54A, MAGOH, FMR1, PRPF3, TOPORS, PPP1CC, SARNP, SENP2, EIF4A3, HIF1A, RPAIN, CPSF6, MDM2, CHFR, NEK6, THOC1, SRSF10, BLM, ANGEL2, NR2C1, RPA1, RPA2, SUMO1, CIR1, MORC3, TRIM69, NPAT, GEMIN6, APEX1, ZC3H14, ZMYM2, GEMIN2, DDX1, SMC5, SAP18, SMC6, AFF2, RNPS1, CBY1, NXF1, NOP10, ATRX, SRSF3, SON, SRSF5, I…	65	0.000540416	3.26727
CA1	Upregulated	GOTERM_CC_DIRECT	GO:0031965~nuclear membrane	NDUFB4, XPO1, TMEM18, HAX1, VAPA, HACD3, AHCTF1, WTAP, CEP70, NDC1, SUMO1, CEPT1, RB1CC1, GSTO1, RANBP2, PUM2, TPR, MX2, AKIRIN1, DNAJC2, TNPO1, RASA1, ZFP354C, GTPBP4, MYO6, PTGER3, NUDT1, ZC3HC1, MRPS23, PTPN2, FAM188A, DCTN5, FAM76B, PCM1, ANXA4, NAT8F3, SENP2, SENP1, HSD11B1, TSGA10, CNEP1R1, TMPO, CMTM3, ALG14	44	0.000160557	3.79437
CA1	Upregulated	GOTERM_CC_FAT	GO:0030529~intracellular ribonucleoprotein complex	NAF1, XPO1, SRP14, RPL36A, MRPS33, RPL19, PRPF4B, FASTKD2, LSM8, RBM3, IMPACT, RPL15, RPS27L, CNOT7, MRPS31, SMNDC1, RSL1D1L1, MAK16, BTBD1, RBM8A, SRRM2, DDX25, LSM5, RPP30, LUC7L2, LSM3, RPL11, PUM2, RPL12, MRPL32, RPS27A, API5, MRPL35, DDX39A, KRR1, MRPL50, ROCK2, SRP54A, MAGOH, FMR1, HNRNPA2B1, HNRNPR, HNRNPU, MRPS18C, DHX29, PSMA6, MRPS18A, EIF2S1, TIAL1, RPS14, PSMA4, RPS11, SNRPE, MCTS1, L…	182	1.36131e-06	5.86604
CA1	Upregulated	GOTERM_CC_DIRECT	GO:0005739~mitochondrion	HCCS, PDP1, RAD51C, FASTKD1, FASTKD2, AURKAIP1, UXS1, HIBADH, COL4A3BP, OGT, MRPL32, APOO, MRPL35, AADAT, RPUSD4, CRLS1, MRPL50, SUCLG2, MTPAP, NME6, DHX29, RPS14, DLD, ATP5C1, GATB, ACADSB, SDHAF4, MTX2, CHCHD1, CHCHD3, TXN1, WARS2, MTIF2, ACAT1, KRAS, ARG2, SYBU, GCSH, SUPV3L1, MTERF4, PPP2R2B, KIF1BP, TIGAR, RARS2, CLCC1, MAOB, JTB, MPC1, MPC2, OCIAD1, VDAC3, PPA2, PARP9, PTCD3, HEBP2, PON2, G…	244	7.0023e-08	7.15476
CA1	Upregulated	GOTERM_CC_DIRECT	GO:0005813~centrosome	CEP57L1, VPS37A, CPEB1, ARL2BP, CEP70, OFD1, PRKAR2B, DCAF12, DYNLL1, IFT20, VPS4B, CEP290, RANBP1, ORC2, POC5, CDH23, CEP295, RPGR, IFT80, ROCK2, STK26, OLA1, ZFP322A, DCTN5, SKP1, TXNDC9, TACC3, PCM1, CDKL2, CEP44, NME7, ARL3, TMEM67, ANKRD26, PSMA1, FOPNL, SASS6, DCLRE1B, CEP162, FGFR1OP, IFT81, MAPRE1, NFE2L2, DYNLRB1, WDR43, IFT88, MAP7D3, DYNC1I2, IFT74, SNAP29, IQCB1, TAPT1, BBS4, HAUS3, K…	96	5.33232e-10	9.27308
CA1	Upregulated	GOTERM_CC_DIRECT	GO:0070062~extracellular exosome	PTGS1, RPL15, NAA16, VPS50, B2M, CUL3, OGN, BHLHB9, VPS4B, DHX36, RPL11, RPL12, CAB39, AUP1, C4B, EIF2S3, COLEC12, SERPING1, SKP1, SPAG9, NPC2, RPS14, F3, EIF2S1, RPS11, ARL8B, ADSS, ACADSB, CHCHD3, GSTCD, AHCTF1, ACP1, ARG1, RPS28, PROCR, KLKB1, RAC1, FGL2, MAOB, SERPINI1, UBE2L3, RPS5, VDAC3, RPS8, RPE, SRSF7, CD300A, HEBP2, PCNA, GK, HSPA13, RTN4, SRSF1, CYP2J4, PDIA3, NAAA, RT1-DB1, UBE2G1, U…	393	4.66027e-12	11.3316
CA1	Upregulated	KEGG_PATHWAY	rno04620:Toll-like receptor signaling pathway	PIK3CG, PIK3CB, TBK1, NFKBIA, TLR3, TLR4, TLR6, STAT1, TLR7, IFNAR1, MAP3K7, CD86, MAPK12, RIPK1, IRF7, RAC1, IL12A, TICAM2, PIK3CA, MAP2K6, CHUK	21	0.0338545	1.47038
CA1	Upregulated	KEGG_PATHWAY	rno05164:Influenza A	XPO1, IFIH1, TBK1, RT1-DB1, IL18, NFKBIA, TLR3, TLR4, IL33, RT1-BA, TLR7, RT1-DA, NXT2, RT1-BB, PIK3CA, CASP1, MX2, IFNGR2, MAP2K6, PIK3CG, PIK3CB, NXF1, STAT1, IFNAR1, EIF2AK1, MAPK12, EIF2S1, IRF7, IL12A, JAK2, OAS1A, EIF2AK2	32	0.0309475	1.50937
CA1	Upregulated	KEGG_PATHWAY	rno04623:Cytosolic DNA-sensing pathway	POLR3G, POLR3F, POLR2F, TBK1, POLR2K, IL18, NFKBIA, POLR3GL, IL33, POLR3C, AIM2, RIPK1, IRF7, CASP1, CHUK	15	0.0297332	1.52676
CA1	Upregulated	KEGG_PATHWAY	rno00520:Amino sugar and nucleotide sugar metabolism	CYB5R4, CYB5R2, NANS, GNPDA1, GNPDA2, CMAS, GNPNAT1, GFPT1, HEXB, NPL, UXS1, FPGT, PMM2, UGP2	14	0.0262149	1.58145
CA1	Upregulated	KEGG_PATHWAY	rno00240:Pyrimidine metabolism	DCTD, POLR3G, POLR3F, POLR2G, POLR2F, NT5C3A, POLR2K, PNPT1, POLA1, POLR3GL, CTPS2, POLR2D, POLR3C, NME7, CMPK1, NME6, PRIM1, POLE3, NT5C2, PRIM2, RRM1, DPYD, TWISTNB, ENTPD1	24	0.0104604	1.98045
CA1	Upregulated	KEGG_PATHWAY	rno03050:Proteasome	PSMB10, PSMA7, PSMA1, PSMD14, PSMC6, PSME1, PSMD12, PSMA6, PSMD11, PSME2, PSMA4, PSMC2, PSMB3, PSMA3, PSMB2, PSMD4, PSME4	17	0.000694003	3.15864
CA1	Upregulated	KEGG_PATHWAY	rno03010:Ribosome	RPL36A, MRPS16, RPL19, RPL15, RPL27A, RPL36, RPS15A, RPS27L, MRPL20, RPS3, RPS27, RPS28, RPL7, RPL31, RPL9, RPL34, RPL5, RPL11, RPL12, RPL10A, RPL4, MRPL32, RPS21, RPS23, RPS27A, MRPL35, MRPL1, RPL26, MRPS5, RPL24, MRPS21, RPL23A, RPS5, RPS8, MRPL23, MRPS18C, RPL41, RPL23, RPL13A, RPL22, MRPS18A, RPL21, RPS14, RPS11	44	3.00616e-06	5.52199
CA1	Downregulated	GOTERM_BP_DIRECT	GO:0050885~neuromuscular process controlling balance	JPH4, RBFOX2, CAMTA1, JPH3, BCR, ADCY5, AARS, NLGN2, NR4A3, NRXN1, SHANK1, SHANK3, LOC100909750, ATP2B2, RAC3, GRIN2C, NKX6-2, DLG4, CNTNAP1, ABL2	20	0.000108421	3.96489
CA1	Downregulated	GOTERM_BP_DIRECT	GO:0018108~peptidyl-tyrosine phosphorylation	FGFR1, FGFR3, ERBB4, PDGFB, HK1, EPHB3, EPHB1, CDC37, EPHB2, IGF1R, ZAP70, TIE1, SHC3, EGFR, TYRO3, FLT4, EPHA2, LOC100909750, DDR1, FYN, DYRK1B, TESK1, RELN, MST1R, TNK2, ABL2	26	0.00302046	2.51993
CA1	Downregulated	GOTERM_BP_DIRECT	GO:0043433~negative regulation of sequence-specific DNA binding transcription factor activity	WFS1, GLIS2, HR, EGLN1, KEAP1, GAS6, FLNA, MEN1, CTNNBIP1, IGF1R, HDAC4, PRMT2, WWP2, MAP3K10, PEX14, PTCH1, ID3	17	0.0206699	1.68466
CA1	Downregulated	GOTERM_BP_DIRECT	GO:0060976~coronary vasculature development	MEGF8, LTBP1, LRP1, KIF7, NDST1, ROBO1, SMAD6, PTK7, PLXND1, TAB1, SMARCA4	11	0.0278131	1.55575
CA1	Downregulated	GOTERM_BP_DIRECT	GO:0048013~ephrin receptor signaling pathway	ANKS1A, CDK5R1, EFNA2, EFNB1, EFNB2, EFNA3, EPHA10, EPHB3, EPHB1, EPHA2, EPHB2, NCK2, EPHB6, CRK	14	0.0018928	2.72289
CA1	Downregulated	GOTERM_BP_DIRECT	GO:0071625~vocalization behavior	BRINP1, NRXN2, DLG4, NLGN3, MYH14, NRXN1, SHANK1, SHANK3	8	0.00641416	2.19286
CA1	Downregulated	GOTERM_BP_DIRECT	GO:0007010~cytoskeleton organization	DLC1, PDGFB, TUBB2B, PDLIM7, TUBB2A, WDR81, ITPKA, TTL, CTNNB1, PACSIN1, SLC16A1, CUL7, ANK3, CCSAP, CUL9, BCR, ACTN4, BAIAP2, PDXP, BSN, ACTN1, SIPA1L3, MARK4, BICD2, DCTN1, PPARGC1B, FRY, RND1, NAV1, FLII, CLIP2, MAP7D1, ADD2, SPTB, ADD1, CCDC8, PALM, CDK5R1, MOB2, SSH1, ELN, DAG1, PTK7, SOX9, SRF, LLGL1, CDC42EP1, SAC3D1, RAC3, OBSL1, AGRN, TUBB4A, ARHGDIA, ARHGEF10L, LURAP1, TAOK2, HTT, PCNT,…	28	0.00216334	2.66488
CA1	Downregulated	GOTERM_BP_DIRECT	GO:0035914~skeletal muscle cell differentiation	EGR1, HLF, EGR2, SOX11, LEMD2, NR4A1, EEF2, SOX8, MEF2D, FOS, NOTCH1, HIVEP3, BCL9L, BCL9	14	0.0392549	1.40611
CA1	Downregulated	GOTERM_BP_DIRECT	GO:0048593~camera-type eye morphogenesis	FGFR3, SOX2, JAG1, SOX9, SOX8, GLI3, EPHB1, CTNNB1, EPHB2, CRB2, FAT1, POU2F1, DSCAM, PTPRM, SOX11, SDK2, NECTIN1, RING1, SKI, ARID1A, EPHA2, TENM3, HIPK2, FJX1, GDF11, ATP8A2, LRP5, BCAR3	9	0.0278757	1.55477
CA1	Downregulated	GOTERM_BP_FAT	GO:0007399~nervous system development	DLC1, PPP2R5B, TUBB2B, PPP2R5D, RORA, GRIN3A, WDR81, CTNNB1, CDH22, CUL7, GRIN2B, TYRO3, WNT10A, MAGI2, PTPRM, SCN2B, PTPRF, RXRA, PTPRS, BSN, TMEM132A, PTPRU, MARK4, SSTR4, SSTR2, FOXG1, ZNHIT2, ABAT, UNC13A, MOB2, ERBB4, CRTC1, HSPA1A, BCL2L1, XAB2, SCRIB, ATN1, RAC3, OBSL1, TCF4, TCF3, DVL3, SPHK2, PCNT, GAS1, KIF3C, GAS6, FNBP1, ARF1, SMURF1, MAP6, RERE, LZTS1, TRPV2, MMP24, POMGNT2, XYLT1, D…	423	4.2786e-56	55.3687
CA1	Downregulated	GOTERM_BP_FAT	GO:0007267~cell-cell signaling	LYPD1, SYT5, LTBP4, ADCY5, PNKD, SYT3, SIDT2, AMOTL2, ADORA1, CTNNB1, PGR, ATP2B2, HTR1B, CRY2, GRIN2B, GRIN2C, GRIN2D, GRID2, CHRNA4, RARA, WNT10A, ANAPC2, WNT10B, DAB2IP, PTPRU, PTPRN, RPTOR, SSTR4, MGAT3, SSTR2, ABAT, DOC2B, UNC13A, GNAI2, ERBB4, CRTC1, CACNB1, CACNB3, PEX5L, SCRIB, RIMS4, EPHB2, RIMS3, RAC3, AGRN, DVL3, CELSR2, CELSR1, CAMK2N2, CAMK2N1, NOTCH1, CNIH2, ARF1, DLX5, TMOD2, FJX1,…	219	5.18002e-23	22.2857
CA1	Downregulated	GOTERM_BP_FAT	GO:0023051~regulation of signaling	DLC1, PEAR1, PPP2R5B, PPP2R5D, RORA, CTNNB1, DIRAS1, HTR1B, DIRAS2, GRIN2B, MAP3K9, ACAA2, TYRO3, WNT10B, MAGI2, PTPRF, SIPA1L3, RPTOR, BRAP, SSTR4, ABAT, MST1R, DOC2B, UNC13A, ERBB4, GNAI2, NFKBIB, CRTC1, HSPA1A, BCL2L2, BCL2L1, SCRIB, HEXIM1, ZAP70, TCF4, ARHGEF10L, IQSEC1, DVL3, TAOK2, GAS1, CAMK2N2, GAS6, ARF1, HGS, SMURF1, SLC9A1, SH3RF1, LZTS2, LZTS1, NISCH, HSF1, MGRN1, PHF24, BRD4, RAP2A,…	393	4.3933e-25	24.3572
CA1	Downregulated	GOTERM_BP_FAT	GO:0007417~central nervous system development	DLC1, KCNC1, EFNA2, ARNT2, JAG2, FOXO3, RORA, ZIC1, ZIC2, CTNNB1, CDH22, ATP2B2, SEZ6L2, GRIN2B, ROBO1, ATG7, SEMA7A, LOC100911402, NKX6-2, GRID2, OLIG1, H2AFX, RARA, SAMD4B, EGFR, TYRO3, RBFOX2, IRS2, DAB2IP, BCR, FA2H, MDGA1, FUT10, AARS, TMEM132A, SOCS7, PTPRS, ARID1A, HDAC11, NUMBL, SSTR4, ASCL1, SSTR2, NAV2, LAMC3, FOXG1, PYGO2, ABAT, RELN, EXT1, ADGRA2, SMARCA4, FGFR1, CDK5R1, CDK5R2, FGFR3…	191	3.22448e-22	21.4915
CA1	Downregulated	GOTERM_BP_FAT	GO:0016358~dendrite development	LZTS1, SRCIN1, CPEB3, GRIN3A, ITPKA, PACSIN1, CUL7, ROBO1, PAK4, DLG4, SS18L1, DSCAM, RAP2A, RBFOX2, ANAPC2, DAB2IP, PTPRF, BAIAP2, ARID1B, NUMBL, BBS1, NCK2, RELN, CUX2, SEMA4D, CARM1, SEZ6, PALM, ACHE, CDK5R1, STK11, CRTC1, CTNND2, EPHB3, HPRT1, EPHB1, EPHB2, FBXW8, OBSL1, FLRT1, SLC12A5, GRIN1, NLGN2, CELSR2, NLGN3, SMAD1, SHANK1, SHANK3, LOC100909750, TBC1D24, SARM1, ARF1, FYN, MAPK8IP2, MAP6…	62	9.44689e-13	12.0247
CA1	Downregulated	GOTERM_BP_FAT	GO:0010769~regulation of cell morphogenesis involved in differentiation	MCRIP1, LZTS1, PLXNA1, SRCIN1, TRPV2, PREX1, ITPKA, TTL, CTNNB1, CUL7, ROBO1, SEMA7A, SS18L1, DSCAM, RAP2A, ANAPC2, DAB2IP, PTPRF, ACTN4, LIMK1, PLXNB1, BAIAP2, FLNA, SLIT3, NUMBL, RCC2, SEMA4G, SEMA4F, CNTN2, RELN, CUX2, COL1A1, SEMA4D, MEGF8, CDK5R1, ACHE, SSH1, STK11, DAG1, ARHGAP35, EPHB3, CDH4, SRF, EPHB2, RGMA, FBXW8, CRB2, RAC3, OBSL1, POU3F2, BCL9L, AGRN, PLXND1, AATK, UST, ZFP703, GRIN1,…	78	3.29137e-11	10.4826
CA1	Downregulated	GOTERM_BP_FAT	GO:0040011~locomotion	DLC1, ADCY3, TUBB2B, EFNA2, STAT5B, ADORA1, CTNNB1, PGR, ATP2B2, GBF1, GRIN2C, SEMA7A, CCSAP, GAB1, TYRO3, PLD2, DAB2IP, PTPRM, BCR, MAGI2, PTPRF, EFNB1, MDGA1, EFNB2, PTPRU, VASH1, JUP, SSTR4, RCC2, NAV1, FOXG1, LAMC1, EXT1, ADGRA2, KIF26A, CDK5R1, CDK5R2, ERBB4, DAG1, EPHB3, SCRIB, EPHB1, EPHB2, LAMB2, ATN1, LHX2, LHX6, AGRN, SASH1, SPNS2, PCNT, RHBDF1, CELSR2, CELSR1, GAS1, EPHA2, GAS6, SEMA6A…	215	4.76175e-13	12.3222
CA1	Downregulated	GOTERM_BP_FAT	GO:0007167~enzyme linked receptor protein signaling pathway	GDF1, PDGFB, PPP2R5B, LTBP3, PPP2R5D, MMP9, EFNA2, LTBP4, EFNA3, STAT5B, LEMD2, CSPG4, ADORA1, ZIC2, CTNNB1, EIF4EBP2, GAB1, FRS3, HTRA3, MVB12B, EGFR, IRS2, DAB2IP, BCR, MAGI2, SOGA1, PTPRF, BAIAP2, EFNB1, EFNB2, SOCS7, PTPRT, SOCS5, IRS1, COL1A1, ADGRA2, GLG1, ZC3H3, FGFR1, CDK5R1, FGFR3, ERBB4, STK11, AFAP1L2, EPHA10, EPHB3, SOX9, EPHB1, EPHB2, EPHB6, CRB2, RNF165, SMAD6, WDR6, RHBDF1, SKI, IT…	122	2.97409e-09	8.52665
CA1	Downregulated	GOTERM_BP_FAT	GO:0010001~glial cell differentiation	PRX, WASF3, PDGFB, NF1X, GLI3, CTNNB1, MMP24, AKT1, CLCF1, GSN, NKX6-2, OLIG1, AKT2, EGR1, EGFR, SOX10, EGR2, FA2H, SOX11, HDAC11, ARHGEF10, MYCN, ASCL1, LAMC3, CNTN2, RELN, GAP43, SMARCA4, FGFR3, DAG1, SOX6, SOX9, SOX8, LINGO1, LAMB2, AGT, BCL2, POU3F2, ERCC2, MAG, DTX1, SKI, NLGN3, SIRT2, LOC100909750, TENM4, DLX2, NOTCH1, ZFP488, WDR1, MTOR, ABL2	52	4.43945e-09	8.35267
CA1	Downregulated	GOTERM_BP_FAT	GO:0050808~synapse organization	PDGFB, CLSTN3, CLSTN1, CTNNB1, SEZ6L2, ATP2B2, ANK3, DLG4, DSCAM, ADGRB2, ANAPC2, DAB2IP, MAGI2, NRXN2, MDGA1, SDK2, NECTIN1, BSN, NRXN1, LRRC24, SLITRK1, CNTN2, C1QL1, RELN, CUX2, NCAN, SEZ6, UNC13A, PALM, RAB3A, ACHE, SSH1, ERBB4, TNC, CTNND2, CACNB1, CACNB3, EPHB3, EPHB1, EPHB2, LAMB2, AGRN, PLXND1, FLRT1, GRIN1, ASIC2, NFASC, NLGN2, PDZRN3, NLGN3, SHANK1, SHANK3, ELFN1, WNT7B, SPTBN2, ADGRL1,…	61	2.79332e-13	12.5539
CA1	Downregulated	GOTERM_BP_FAT	GO:0006366~transcription from RNA polymerase II promoter	SCAF1, GDF1, PPP2R5B, PPP2R5D, STAT5B, LEMD2, RORA, CTNNB1, PGR, CRY2, WWP2, NKX6-2, RARA, HTRA3, WNT10B, DAB2IP, RARG, RXRA, ZHX3, TOX2, PPARGC1B, MTF1, FOXG1, MNT, ZNHIT1, ELL, CRTC1, ATN1, HEXIM1, LHX2, AGRN, BCOR, TCF4, TCF3, ARHGEF10L, HNRNPAB, ESRRA, KLF13, SMAD6, CREBBP, KLF16, SKI, SMAD1, NOTCH3, DLX2, NOTCH1, CSRNP3, IRF2BPL, DLX5, PPRC1, SMURF1, NCOR2, RERE, SLC9A1, HLF, PPARD, BACH2, C…	226	1.34974e-10	9.86975
CA1	Downregulated	GOTERM_BP_FAT	GO:0009790~embryo development	DLC1, GDF1, PDGFB, EFNA2, MMP9, ARNT2, HIRA, JAG2, VPS52, ZIC2, CTNNB1, ATP2B2, GRIN2B, GAB1, ETL4, RARA, ITPK1, FLVCR1, EGFR, RARG, BCR, RXRA, EFNB1, ARID1A, VASH1, MGAT1, FOXG1, PYGO2, COL1A1, EXT1, SMARCA4, ADD1, FRAS1, FGFR1, CDK5R1, ERBB4, ELL, SOX2, TFEB, DAG1, PTK7, DSCAML1, LRIG1, KEAP1, BCL2L1, SOX6, SOX9, SOX8, SRF, XAB2, SCRIB, EPHB2, FBXW8, ECE1, CRB2, LHX2, HCN4, TCF3, MAFG, DVL3, EH…	156	8.60544e-09	8.06523
CA1	Downregulated	GOTERM_BP_FAT	GO:0051641~cellular localization	LYPD1, PLEKHM2, SYT5, U2AF2, ADCY5, PNKD, SYT3, ADCY6, SRP68, VPS52, LEMD2, STOML2, RANGAP1, SIDT2, WDR81, ADORA1, CTNNB1, GET4, ATCAY, RUNDC1, HTR1B, CRY2, GBF1, GRIN2B, TRAK1, GRID2, PLD2, DAB2IP, MAGI2, BCR, CIZ1, TTC7B, PTPRU, YIF1B, PTPRN, DCTN1, JUP, HEPACAM, RCC2, KIF26A, DOC2B, UNC13A, GLG1, PALM, CDK5R1, ERBB4, NFKBIB, CACNB1, DAG1, CACNB3, BCL2L1, PEX5L, RIMS4, SCRIB, RIMS3, OBSL1, AGRN…	286	3.21593e-10	9.49269
CA1	Downregulated	GOTERM_BP_FAT	GO:0050768~negative regulation of neurogenesis	ADCY5, ADCY6, CSPG4, FOXO3, JAG1, GLI3, CTNNB1, BRINP1, HEY1, XYLT1, NKX6-2, SEMA7A, NR2F1, INPPL1, SOX11, FLNA, MYCN, ASCL1, SEMA4G, SEMA4F, FOXG1, CNTN2, SEMA4D, CARM1, SEZ6, CDK5R1, FGFR3, RAP1GAP, ERBB4, SOX2, SOX9, SOX8, EPHB2, RGMA, LINGO1, AATK, MAG, DTX1, RTN4R, DPYSL3, SKI, NLGN3, ADGRG1, NTN1, SIRT2, NOTCH3, SEMA6A, DLX2, SEMA6B, WNT7B, NOTCH1, LRP1, ULK1, GDF11, CIT, SYNGAP1, APBB1, LR…	59	5.26174e-08	7.27887
CA1	Downregulated	GOTERM_BP_FAT	GO:0001649~osteoblast differentiation	ALPL, FGFR1, ACHE, PDLIM7, TNC, SOX2, FAM20C, PTH1R, HIRA, JAG1, GLI3, SOX8, CTNNB1, AKT1, MEN1, HEY1, SEMA7A, FASN, LIMD1, WNT10B, SOX11, LMNA, FZD1, ZHX3, IGF2, SKI, SMAD1, WWTR1, EPHA2, GDPD2, CTNNBIP1, HDAC5, HDAC4, MEF2D, NOTCH1, WNT7B, DLX5, PTCH1, SP7, GNAS, ID3, SEMA4D, COL1A1, TP53INP2, ADAR, LRP5	46	4.7334e-07	6.32483
CA1	Downregulated	GOTERM_BP_FAT	GO:0090066~regulation of anatomical structure size	CASR, PPARD, LRRC8A, PLXNA1, HIP1R, TRPV2, PREX1, ADCY6, ADORA1, TTL, AKT1, ATP2B2, HTR1B, GSN, SEMA7A, DSCAM, EGFR, ANAPC2, PTPRM, LIMK1, BAIAP2, PDXP, SLC9A3R1, RPTOR, NCK2, SEMA4G, SEMA4F, CNTN2, FHOD3, PLA2G6, SEMA4D, ADD2, ADD1, MEGF8, CDK5R1, ADORA2B, SSH1, ELN, HSPA1A, ARHGAP35, CX3CL1, CDH4, SRF, RGMA, CDC42EP1, ECE1, AGT, WIPF2, PLXND1, PIK3R2, AATK, WDTC1, SLC8A1, NOS1, ASIC2, RTN4R, AR…	83	4.6025e-06	5.33701
CA1	Downregulated	GOTERM_BP_FAT	GO:1905114~cell surface receptor signaling pathway involved in cell-cell signaling	LZTS2, BTRC, GRIK5, FOXO3, LGR6, GLI3, AMOTL2, ADORA1, CTNNB1, GRIN2B, GRIN2C, GRIN2D, DLG4, GRID2, CHRNA4, EGR1, SOX10, WNT10A, DAB2IP, WNT10B, CSNK1G2, LDB1, TLE3, NRXN1, PTPRU, TLE2, SLC9A3R1, CTNNBIP1, MGAT3, CELF4, ABAT, PYGO2, RELN, CUX2, COL1A1, SEZ6, SMARCA4, NKD1, WNT5B, FGFR3, SSH1, APC2, STK11, SOX2, CTNND2, PTK7, CTNND1, CX3CL1, SOX9, GPRC5B, LOC100909849, CALCOCO1, HIC1, AMER2, LIMD1…	88	1.57652e-12	11.8023
CA1	Downregulated	GOTERM_BP_FAT	GO:0048589~developmental growth	PLXNA1, SYT3, STAT5B, FOXO3, TTL, ROBO1, SEMA7A, RARA, SPR, FLVCR1, DSCAM, ANAPC2, WNT10B, RARG, PLXNB1, RXRA, SLITRK1, PYGO2, UNC13A, ADD1, SMARCA4, FGFR1, CDK5R1, FGFR3, ERBB4, STK11, SOX2, PTK7, DAG1, SOX9, TIMP3, SRF, RASAL1, LAMB2, ATN1, LHX2, AGRN, PLXND1, CPNE5, PCNT, SPTBN4, FDPS, ICMT, SMAD1, GAS1, EHMT2, NTN1, ATP13A2, FOXP1, GAS6, NOTCH3, SEMA6A, NOTCH1, SEMA6B, ULK1, PRKAR1A, SPTBN2, …	126	1.9118e-13	12.7186
CA1	Downregulated	GOTERM_BP_FAT	GO:0007423~sensory organ development	PDGFB, EFNA2, PRRX1, JAG2, SOBP, JAG1, GLI3, CTNNB1, SPRY2, ATP2B2, GRIN2B, HEY1, RARA, IMPDH1, USH2A, SLC4A5, DSCAM, SH3PXD2B, EGFR, TUB, WNT10A, WNT10B, PTPRM, BCR, RARG, RXRA, SOX11, SDK2, RING1, NECTIN1, SIPA1L3, ARID1A, SLC9A3R1, SLC9A3R2, MYCN, RAB11FIP4, ASCL1, DDR1, LRP10, LAMC3, FOXG1, HIPK2, PYGO2, ZFP513, SMARCA4, FGFR1, ACHE, FZR1, FKBP8, FGFR3, SOX2, PTK7, LRIG1, ARHGAP35, PRDM16, SO…	91	1.7138e-06	5.76604
CA1	Downregulated	GOTERM_BP_FAT	GO:0023051~regulation of signaling	DLC1, PEAR1, PPP2R5B, PPP2R5D, RORA, CTNNB1, DIRAS1, HTR1B, DIRAS2, GRIN2B, MAP3K9, ACAA2, TYRO3, WNT10B, MAGI2, PTPRF, SIPA1L3, RPTOR, BRAP, SSTR4, ABAT, MST1R, DOC2B, UNC13A, ERBB4, GNAI2, NFKBIB, CRTC1, HSPA1A, BCL2L2, BCL2L1, SCRIB, HEXIM1, ZAP70, TCF4, ARHGEF10L, IQSEC1, DVL3, TAOK2, GAS1, CAMK2N2, GAS6, ARF1, HGS, SMURF1, SLC9A1, SH3RF1, LZTS2, LZTS1, NISCH, HSF1, MGRN1, PHF24, BRD4, RAP2A,…	393	4.3933e-25	24.3572
CA1	Downregulated	GOTERM_BP_FAT	GO:0035295~tube development	DLC1, CASR, LTBP3, BTRC, VPS52, JAG1, ZIC2, CTNNB1, PGR, ROBO1, RARA, SLC4A2, ITPK1, EGFR, DAB2IP, RARG, RXRA, EFNB2, ARID1A, ASCL1, RELN, ADAMTS2, FGFR1, FGFR3, SOX2, PTK7, DAG1, EPHB3, SOX9, SRF, SOX8, SCRIB, LHX2, PLXND1, TRAF4, DVL3, EPAS1, SMAD6, PCNT, TEAD2, ITGA3, SKI, CELSR1, GAS1, NR4A3, SMAD1, FOXP4, ADGRG1, NTN1, FOXP1, SHANK3, EPHA2, HDAC5, SALL2, NOTCH1, NCOR2, GPR161, GLI3, SPRY2, B…	100	8.10218e-06	5.0914
CA1	Downregulated	GOTERM_BP_FAT	GO:0006366~transcription from RNA polymerase II promoter	SCAF1, GDF1, PPP2R5B, PPP2R5D, STAT5B, LEMD2, RORA, CTNNB1, PGR, CRY2, WWP2, NKX6-2, RARA, HTRA3, WNT10B, DAB2IP, RARG, RXRA, ZHX3, TOX2, PPARGC1B, MTF1, FOXG1, MNT, ZNHIT1, ELL, CRTC1, ATN1, HEXIM1, LHX2, AGRN, BCOR, TCF4, TCF3, ARHGEF10L, HNRNPAB, ESRRA, KLF13, SMAD6, CREBBP, KLF16, SKI, SMAD1, NOTCH3, DLX2, NOTCH1, CSRNP3, IRF2BPL, DLX5, PPRC1, SMURF1, NCOR2, RERE, SLC9A1, HLF, PPARD, BACH2, C…	226	1.34974e-10	9.86975
CA1	Downregulated	GOTERM_BP_FAT	GO:0007610~behavior	ADCY3, LYPD1, WFS1, ADCY5, ZIC1, ADORA1, PGR, SEZ6L2, ATP2B2, SLC16A1, HTR1B, BRINP1, EIF4EBP2, GRIN2B, GRIN2D, ATG7, CHRNA4, DSCAM, EGFR, SLITRK1, NAV2, ABAT, RELN, AMFR, GLUD1, CRTC1, SRF, EPHB2, MAFG, HTT, GRIN1, SPTBN4, ITGA3, CELSR1, NR4A3, SHANK1, EHMT2, SHANK3, GPR37, PRKAR1B, TMOD2, SPTBN2, CACNA1E, MYH14, MTOR, SYNGAP1, ABL2, JPH4, JPH3, FOSL2, CPEB3, SOBP, PAK6, FOS, SLC1A2, DLG4, VWA1,…	101	1.07105e-06	5.97019
CA1	Downregulated	GOTERM_BP_FAT	GO:0043269~regulation of ion transport	MCHR1, KCNC1, JPH4, CASR, JPH3, KCNAB3, PDGFB, LRRC8A, WFS1, ATP1B2, TRPV2, MMP9, KCNJ12, KCNK12, ADORA1, KCNJ11, KCNJ14, CTNNB1, AKT1, ATP2B2, KCNK9, CRY2, STAC, GRIN2B, WWP2, ANK3, GRIN2D, DLG4, CHRNA4, SIK1, KCNQ2, KCNG4, AKT2, IRS2, SCN2B, KCND1, CACNG4, WNK2, NRXN1, SLC9A3R1, ABAT, PLA2G6, RELN, GNAS, KCNH2, ORAI1, GNAI2, CACNB1, HK1, CACNB3, HRH3, BCL2, AGT, RAB11B, PER1, AGRN, KCNE5, MLLT6…	94	6.85052e-07	6.16428
CA1	Downregulated	GOTERM_BP_FAT	GO:0061448~connective tissue development	GLG1, FGFR1, CASR, PPARD, WNT5B, FGFR3, PDGFB, LTBP3, PTH1R, PRRX1, SOX6, SOX9, SERPINH1, SRF, GLI3, SOX8, GPR4, CTNNB1, CHADL, PKD1, RARA, BDH1, SIK3, MAF, SH3PXD2B, EGR1, HYAL1, WNT10B, ESRRA, RARG, ARID5B, LMNA, SMAD1, MYCN, BBS1, MEF2D, DLX2, NOTCH1, WNT7B, DYRK1B, GNAS, UBB, COL1A1, ZFP516, CARM1, AACS, LRP5	47	3.00847e-05	4.52165
CA1	Downregulated	GOTERM_BP_FAT	GO:0007270~neuron-neuron synaptic transmission	ERBB4, SLC6A20, CLSTN3, GRIK3, GRIK5, ADORA1, HTR1B, RAC3, GRIN2D, GRID2, SHC3, EGFR, DLGAP2, GRIN1, FLOT1, NLGN2, NLGN3, NRXN1, ARID1B, SHANK3, SLC6A9, CNIH2, TMOD2, PLA2G6, ADRA1A, RELN, NAT8L, RASD2, UNC13A, HDAC6	30	2.90804e-05	4.5364
CA1	Downregulated	GOTERM_BP_FAT	GO:0007423~sensory organ development	PDGFB, EFNA2, PRRX1, JAG2, SOBP, JAG1, GLI3, CTNNB1, SPRY2, ATP2B2, GRIN2B, HEY1, RARA, IMPDH1, USH2A, SLC4A5, DSCAM, SH3PXD2B, EGFR, TUB, WNT10A, WNT10B, PTPRM, BCR, RARG, RXRA, SOX11, SDK2, RING1, NECTIN1, SIPA1L3, ARID1A, SLC9A3R1, SLC9A3R2, MYCN, RAB11FIP4, ASCL1, DDR1, LRP10, LAMC3, FOXG1, HIPK2, PYGO2, ZFP513, SMARCA4, FGFR1, ACHE, FZR1, FKBP8, FGFR3, SOX2, PTK7, LRIG1, ARHGAP35, PRDM16, SO…	91	1.7138e-06	5.76604
CA1	Downregulated	GOTERM_BP_FAT	GO:0021987~cerebral cortex development	FGFR1, CDK5R1, CDK5R2, SOX2, BCL2L1, GLI3, XAB2, CTNNB1, GRIN2B, ROBO1, BCL2, ATG7, LHX2, LHX6, POU3F2, H2AFX, NR2F1, EGFR, DAB2IP, MDGA1, FUT10, GRIN1, SOCS7, PTPRS, ADGRG1, FLNA, BBS1, ASCL1, LRP1, FOXG1, RELN	31	1.34874e-05	4.87007
CA1	Downregulated	GOTERM_BP_FAT	GO:0065009~regulation of molecular function	DLC1, LYPD1, PPP2R5B, ATP1B2, RANGAP1, WDR81, ADORA1, CTNNB1, SHB, DIRAS1, RUNDC1, CRY2, DIRAS2, STAC, GBF1, WWP2, MAP3K9, GAB1, CHRNA4, RARA, PPP1R37, DAB2IP, WNT10B, MAGI2, BCR, SCN2B, PTPRF, SIPA1L3, WNK2, PPARGC1B, RPTOR, TMEM132D, FRY, JUP, RCC2, ACAP3, MST1R, AMFR, ADD2, ADD1, SIVA1, PALM, CDK5R1, CDK5R2, GNAI2, ERBB4, ELL, CRTC1, CACNB1, DAG1, RUNDC3A, CACNB3, AFAP1L2, HSPA1A, BCL2L1, EPHB…	307	9.06027e-09	8.04286
CA1	Downregulated	GOTERM_BP_FAT	GO:0044802~single-organism membrane organization	LYPD1, LOC100911485, PLEKHM2, SYT5, SRP68, SYT3, ADCY6, LEMD2, GRIK5, STOML2, ADORA1, GET4, PACSIN1, ANK1, GRIN2B, ANK3, ACAA2, TUB, MAGI2, BAIAP2, FA2H, TTC7B, DCTN1, JUP, LETM1, RELN, DOC2B, SPTB, SIVA1, PALM, PACS2, CDK5R1, SSH1, CACNB1, CACNB3, HSPA1A, BCL2L1, AGRN, HTT, KCNB1, SYT11, SPTBN4, ITGA3, SHANK3, EPHA2, GAS6, ARF1, GOLGA7B, HGS, RHOT2, TCAF1, SMURF1, SYNGAP1, SLC9A1, PRX, ZFP13, HP…	103	1.20784e-05	4.91799
CA1	Downregulated	GOTERM_BP_FAT	GO:0072359~circulatory system development	DLC1, LTBP1, PDGFB, MMP9, LEMD2, CSPG4, JAG1, RORA, CTNNB1, SHB, PSKH1, ROBO1, ATG7, GAB1, RARA, ADGRB2, FLVCR1, DAB2IP, PTPRM, RXRA, UBIAD1, EFNB2, MFGE8, ARID1A, VASH1, PNPLA6, COL1A1, ADGRA2, ADD1, SMARCA4, FGFR1, ERBB4, ADORA2B, STK11, ELN, PTK7, SOX6, CX3CL1, EPHB3, SOX9, SRF, EPHB1, EPHB2, PPP1R16B, FBXW8, ECE1, CRB2, HEXIM1, GYS1, PLXND1, BCOR, TCF4, DVL3, SASH1, EPAS1, SPHK2, SMAD6, PCNT,…	131	4.11203e-05	4.38594
CA1	Downregulated	GOTERM_BP_FAT	GO:0014066~regulation of phosphatidylinositol 3-kinase signaling	PLD2, PPARD, DAB2IP, ERBB4, PDGFB, PLXNB1, PTPN13, SOX9, SLC9A3R1, SLC9A3R2, IGF1R, PPP1R16B, UNC5B, FYN, AGT, RELN, RARA, SEMA4D, AGAP2, FBXL2, F2R	21	0.00044812	3.34861
CA1	Downregulated	GOTERM_BP_FAT	GO:0071310~cellular response to organic substance	ADCY3, DLC1, LTBP1, GDF1, PPP2R5B, LTBP3, LTBP4, ADCY5, PPP2R5D, STAT5B, ADCY6, FAM20C, LEMD2, RANGAP1, RORA, CTNNB1, PGR, HTR1B, BRINP1, CRY2, GRIN2B, GAB1, RARA, PELI3, HTRA3, WNT10A, WNT10B, DAB2IP, RARG, BCR, MAGI2, PTPRF, POLG, RXRA, AARS, PTPRN, RPTOR, PPARGC1B, JUP, SSTR4, SSTR2, AMFR, ADGRA2, ADD1, GLG1, ERBB4, NFKBIB, ELN, DAG1, HSPA1A, BCL2L1, CDC37, TCF4, HNRNPAB, SASH1, ESRRA, SMAD6, …	250	9.72895e-07	6.01193
CA1	Downregulated	GOTERM_BP_FAT	GO:0097479~synaptic vesicle localization	STON2, RAB3A, CPLX1, SYT5, SYT3, GRIK5, RIMS4, SCRIB, RIMS3, CTNNB1, PACSIN1, AP3D1, APBA2, APBA1, PLD2, MAGI2, SYT11, RPH3AL, NLGN2, NLGN3, DPYSL2, NRXN1, ARF1, CNIH2, SYDE1, SPTBN2, ADGRL1, DOC2B, UNC13A	29	0.000222971	3.65175
CA1	Downregulated	GOTERM_BP_FAT	GO:0030902~hindbrain development	DLC1, KCNC1, CDK5R1, CDK5R2, GLUD1, NF1X, RORA, SCRIB, CTNNB1, IGF1R, SEZ6L2, ATP2B2, LOC100911402, BCL2, ATG7, GRID2, SAMD4B, RBFOX2, EGR2, LDB1, PCNT, AARS, GRIN1, PTPRS, SOCS7, GAS1, SMAD1, NRXN1, WHRN, FLNA, LOC100909750, ASCL1, ATXN2, SSTR2, NCOA2, ULK1, SPTBN2, ABAT, SEZ6, ABL2, RERE, FAIM2, SMARCA4	43	3.95703e-07	6.40263
CA1	Downregulated	GOTERM_BP_FAT	GO:0008283~cell proliferation	DLC1, LOC100911485, LTBP3, STAT5B, RORA, SIDT2, ADORA1, CTNNB1, PGR, SHB, RARA, NUDT16, WNT10B, DAB2IP, PTPRM, RARG, MAGI2, PTPRF, EFNB1, RXRA, EFNB2, PTPRU, PIM2, WNK2, PTPRN, RPTOR, VASH1, SSTR4, SSTR2, FOXG1, ZNHIT1, PPP2R3B, GNAI2, ERBB4, PTH1R, BCL2L2, BCL2L1, BOP1, EPHB1, SCRIB, EPHB6, ZAP70, TCF3, SPHK2, KLF13, CRIP2, SMAD6, PCNT, RHBDF1, FBXO2, CREBBP, SKI, SMAD1, GAS1, EPHA2, GAS6, NOTCH…	201	0.000818759	3.08684
CA1	Downregulated	GOTERM_BP_FAT	GO:0016049~cell growth	PPARD, PDGFB, FOXK1, PLXNA1, TRPV2, SYT3, TTL, AKT1, ACVR1B, ATAD3A, JADE2, PRMT2, SEMA7A, DSCAM, EGFR, HYAL1, ANAPC2, DAB2IP, RARG, PLXNB1, LIMK1, RPTOR, SLIT3, DDR1, SEMA4G, SEMA4F, SEMA4D, KIF26A, UNC13A, ADAM15, SMARCA4, MEGF8, CDK5R1, EXTL3, STK11, SOX9, CDH4, SRF, RASAL1, RGMA, LAMB2, BCL2, AGT, LHX2, PLXND1, AATK, FLRT1, CPNE5, FLT4, RTN4R, FDPS, NLGN3, GAS1, DPYSL2, ATP13A2, NTN1, LOC1009…	70	7.48304e-05	4.12592
CA1	Downregulated	GOTERM_BP_FAT	GO:0021953~central nervous system neuron differentiation	FGFR1, ERBB4, SOX2, NF1X, ARHGAP35, RORA, EPHB3, HPRT1, GLI3, EPHB1, EPHB2, CTNNB1, LINGO1, ATP2B2, RAC3, ROBO1, NKX6-2, ATG7, GRID2, DCLK2, LHX6, CHD5, SAMD4B, MDGA1, LDB1, SPTBN4, NRXN1, SHANK3, SLIT3, ASCL1, DLX2, ATXN2, ULK1, FOXG1, CNTN2, PTCH1, UBB, FAIM2	38	0.000113737	3.9441
CA1	Downregulated	GOTERM_BP_FAT	GO:0051270~regulation of cellular component movement	DLC1, PDGFB, PLXNA1, SRCIN1, MMP9, STAT5B, ADORA1, ZFP580, PGR, ROBO1, SEMA7A, CCSAP, GAB1, CYGB, SCRT1, DSCAM, EGFR, PLD2, DAB2IP, IRS2, MAGI2, PTPRM, BCR, ACTN4, PLXNB1, ACTN1, PTPRU, IRS1, VASH1, JUP, IGSF8, RCC2, RELN, COL1A1, ADGRA2, SMARCA4, FGFR1, WNT5B, ERBB4, SSH1, DAG1, CX3CL1, SOX9, SRF, AGRN, PLXND1, ARHGDIA, SASH1, ITGA3, ADGRG1, NTN1, FURIN, FOXP1, EPHA2, GAS6, HDAC5, HDAC4, SEMA6A,…	107	0.000432811	3.3637
CA1	Downregulated	GOTERM_BP_FAT	GO:0035295~tube development	DLC1, CASR, LTBP3, BTRC, VPS52, JAG1, ZIC2, CTNNB1, PGR, ROBO1, RARA, SLC4A2, ITPK1, EGFR, DAB2IP, RARG, RXRA, EFNB2, ARID1A, ASCL1, RELN, ADAMTS2, FGFR1, FGFR3, SOX2, PTK7, DAG1, EPHB3, SOX9, SRF, SOX8, SCRIB, LHX2, PLXND1, TRAF4, DVL3, EPAS1, SMAD6, PCNT, TEAD2, ITGA3, SKI, CELSR1, GAS1, NR4A3, SMAD1, FOXP4, ADGRG1, NTN1, FOXP1, SHANK3, EPHA2, HDAC5, SALL2, NOTCH1, NCOR2, GPR161, GLI3, SPRY2, B…	100	8.10218e-06	5.0914
CA1	Downregulated	GOTERM_BP_FAT	GO:0048705~skeletal system morphogenesis	GLG1, ALPL, MEGF8, FGFR3, NDST1, LTBP3, PRRX1, DSCAML1, SOX9, SERPINH1, GLI3, CTNNB1, MEN1, PKD1, RARA, HHIP, SLC39A3, SIK3, FLVCR1, HYAL1, WNT10B, RARG, INPPL1, SOX11, ARID5B, SKI, GAS1, PPARGC1B, FOXN3, MYCN, MEF2D, DLX2, DLX5, GNAS, COL1A1, CARM1, LRP5	37	0.00553827	2.25663
CA1	Downregulated	GOTERM_BP_FAT	GO:0030279~negative regulation of ossification	FGFR1, LTBP3, SMAD6, SOX2, SKI, SOX9, HDAC5, MEN1, HDAC4, NOTCH1, BCL2, PTCH1, LIMD1, ID3, SMURF1, SEMA4D, BCOR, LRP4, LRP5	19	0.00130579	2.88413
CA1	Downregulated	GOTERM_BP_FAT	GO:0021988~olfactory lobe development	FGFR1, ERBB4, HTT, EFNA2, PCNT, SKI, DPYSL2, SRF, SLIT3, DLX2, ROBO1, LHX2, SEMA7A, EXT1	14	0.000860553	3.06522
CA1	Downregulated	GOTERM_BP_FAT	GO:0021782~glial cell development	EGFR, PRX, FGFR3, WASF3, PDGFB, SOX11, FA2H, DAG1, SKI, HDAC11, ARHGEF10, SIRT2, TENM4, AKT1, ASCL1, LAMB2, LAMC3, GSN, NKX6-2, ZFP488, AGT, CNTN2, POU3F2, AKT2, ERCC2	25	2.35573e-05	4.62788
CA1	Downregulated	GOTERM_BP_FAT	GO:0060078~regulation of postsynaptic membrane potential	SSH1, GRIK5, CX3CL1, ADORA1, GRIN2B, GRIN2C, GRIN2D, GRID2, DLG4, CHRNA4, HCN4, HCN3, SCN2B, GRIN1, ASIC2, NLGN2, NLGN3, NRXN1, SHANK1, IGSF9B, SHANK3, ATXN1, TBC1D24, CELF4, MAPK8IP2, ABAT, RELN, CUX2, SEZ6	29	3.8656e-07	6.41278
CA1	Downregulated	GOTERM_BP_FAT	GO:0048168~regulation of neuronal synaptic plasticity	EGR1, PPFIA3, RAB3A, JPH3, EGR2, NCDN, GRIN1, BCAN, SYNGR1, VGF, SHANK3, EPHB2, PLK3, GRIN2B, AGT, CNTN2, DLG4, SYNGAP1, UNC13A	19	0.000662563	3.17877
CA1	Downregulated	GOTERM_BP_FAT	GO:0045185~maintenance of protein location	CIZ1, TLN2, NFKBIB, ADCY6, GRIK5, SUN2, DAG1, HK1, PIP5K1C, KEAP1, SHANK1, PEX5L, FLNA, OS9, MPRIP, GET4, AKT1, NBL1, GSN, ANK3, PKD1	21	0.000613862	3.21193
CA1	Downregulated	GOTERM_BP_FAT	GO:0007264~small GTPase mediated signal transduction	DLC1, PREX1, RASGEF1B, SPRY2, DIRAS1, DIRAS2, NISCH, GBF1, ROBO1, MFHAS1, RHOC, RAB6B, AGAP1, SHC3, AGAP2, AGAP3, RAP2A, DAB2IP, BCR, MADD, ARHGEF18, ARHGEF19, FLOT1, ARL16, PSD2, ARHGEF10, BRAP, SH2D3C, RND1, ARHGAP33, RELN, ARL8A, GPR17, ARL4D, RASD1, FKBP11, NKIRAS2, RASD2, RAB3A, ARHGAP35, GPR4, RASAL1, TRIM67, CDC42EP1, RAC3, RAB11B, RASA3, ARHGEF10L, ARHGDIA, IQSEC1, AATK, TRIO, ICMT, ITGA3…	73	0.000365616	3.43697
CA1	Downregulated	GOTERM_BP_FAT	GO:0009612~response to mechanical stimulus	KCNC1, FOSL2, LTBP1, PDGFB, MMP9, CTNNB1, AKT1, FOS, ATP2B2, GRIN2B, GRIN2D, PHF24, EGR1, EGFR, NRXN2, NRXN1, FOSB, JUP, RELN, COL1A1, TNC, SOX2, DAG1, HSPA1A, SOX9, TIMP3, IGF1R, ECE1, AGT, PKD1, AFAP1, ARHGDIA, ACTB, MAG, SLC8A1, NOS1, HTT, LMNA, ASIC2, IGF2, ATP1A2, SHANK3, HDAC4, MYH9L1, FYN, ATP8A2, PTCH1, IGFBP2, CLCN6, SLC9A1	50	6.88192e-05	4.16229
CA1	Downregulated	GOTERM_BP_FAT	GO:0001941~postsynaptic membrane organization	MAGI2, SSH1, NRXN2, DLG4, NLGN2, NLGN3, RELN, AGRN, NRXN1, SHANK3, LRP4, LRP5	12	0.00209079	2.67969
CA1	Downregulated	GOTERM_BP_FAT	GO:0006887~exocytosis	SRCIN1, SYT5, SYT3, GRIK5, NCS1, PIP5K1C, CDK16, SCAMP5, PLD2, BCR, MICAL3, RPH3AL, NRXN1, RAB11FIP5, PLA2G6, DOC2B, UNC13A, RAB3A, CDK5R2, CPLX1, ADORA2B, EXOC8, BRSK2, PEX5L, LLGL1, RIMS4, SCRIB, RIMS3, ARHGAP44, RAB11B, APBA2, SEC22C, PRSS12, APBA1, VPS18, KCNB1, SYT11, CACNA1I, CBARP, SCRN1, NR4A3, ATP13A2, NOTCH1, ARF1, SYDE1, SPTBN2, CACNA1G, HGS, ADGRL1, SMPD3	50	0.000319236	3.49589
CA1	Downregulated	GOTERM_BP_FAT	GO:0032446~protein modification by small protein conjugation	SH3RF1, BACH2, WFS1, TOLLIP, BTRC, CBX4, RNF216, RNF187, OS9, CTNNB1, AKT1, JADE2, TRIM3, MGRN1, CUL7, WWP2, ATG7, CUL9, BTBD2, KLHL21, PELI3, FBXO21, RNF145, RNF31, ANAPC2, ANKS1A, EGR2, LIMK1, UBR4, RING1, SOCS7, GAN, SOCS5, HERC2, BRAP, RNF180, PJA1, UBE2O, KLHL18, MIB2, CAND2, AMFR, UBB, RASD2, ZER1, FBXL2, FZR1, FGFR3, UBE3B, ABTB2, HSPA1A, KEAP1, NHLRC1, UBE2QL1, FEM1A, STUB1, RNF126, RNF12…	91	0.00129634	2.88728
CA1	Downregulated	GOTERM_BP_FAT	GO:0002089~lens morphogenesis in camera-type eye	FGFR3, SOX11, HIPK2, SOX2, NECTIN1, POU2F1, SKI, EPHA2, CTNNB1, BCAR3	10	0.00199954	2.69907
CA1	Downregulated	GOTERM_BP_FAT	GO:0051270~regulation of cellular component movement	DLC1, PDGFB, PLXNA1, SRCIN1, MMP9, STAT5B, ADORA1, ZFP580, PGR, ROBO1, SEMA7A, CCSAP, GAB1, CYGB, SCRT1, DSCAM, EGFR, PLD2, DAB2IP, IRS2, MAGI2, PTPRM, BCR, ACTN4, PLXNB1, ACTN1, PTPRU, IRS1, VASH1, JUP, IGSF8, RCC2, RELN, COL1A1, ADGRA2, SMARCA4, FGFR1, WNT5B, ERBB4, SSH1, DAG1, CX3CL1, SOX9, SRF, AGRN, PLXND1, ARHGDIA, SASH1, ITGA3, ADGRG1, NTN1, FURIN, FOXP1, EPHA2, GAS6, HDAC5, HDAC4, SEMA6A,…	107	0.000432811	3.3637
CA1	Downregulated	GOTERM_BP_FAT	GO:0051049~regulation of transport	ATP1B2, SYT5, U2AF2, ADCY5, PNKD, SYT3, RANGAP1, SIDT2, ADORA1, CTNNB1, ATP2B2, RUNDC1, HTR1B, KCNK9, CRY2, GRIN2B, STAC, WWP2, GRIN2D, CHRNA4, PLD2, ACAA2, DAB2IP, BCR, MAGI2, SCN2B, WNK2, RPTOR, DCTN1, JUP, ABAT, DOC2B, UNC13A, ADD1, SIVA1, ORAI1, CDK5R1, CDK5R2, GNAI2, ERBB4, NFKBIB, CACNB1, CACNB3, HSPA1A, PEX5L, RIMS4, RIMS3, AGRN, ASPSCR1, PCNT, RHBDF1, GAS1, ATP13A2, GAS6, ADPRH, NOTCH1, C…	225	3.56964e-07	6.44738
CA1	Downregulated	GOTERM_BP_FAT	GO:0043269~regulation of ion transport	MCHR1, KCNC1, JPH4, CASR, JPH3, KCNAB3, PDGFB, LRRC8A, WFS1, ATP1B2, TRPV2, MMP9, KCNJ12, KCNK12, ADORA1, KCNJ11, KCNJ14, CTNNB1, AKT1, ATP2B2, KCNK9, CRY2, STAC, GRIN2B, WWP2, ANK3, GRIN2D, DLG4, CHRNA4, SIK1, KCNQ2, KCNG4, AKT2, IRS2, SCN2B, KCND1, CACNG4, WNK2, NRXN1, SLC9A3R1, ABAT, PLA2G6, RELN, GNAS, KCNH2, ORAI1, GNAI2, CACNB1, HK1, CACNB3, HRH3, BCL2, AGT, RAB11B, PER1, AGRN, KCNE5, MLLT6…	94	6.85052e-07	6.16428
CA1	Downregulated	GOTERM_BP_FAT	GO:0023061~signal release	CASR, PPARD, SYT5, LTBP4, ADCY5, PNKD, SYT3, GRIK5, SIDT2, VGF, ADORA1, KCNJ11, SLC16A1, CRY2, ATG7, CDK16, EGFR, IRS2, NRXN2, PFKL, MADD, PTPRN2, SOX11, RPH3AL, NRXN1, PTPRN, IRS1, RPTOR, RAB11FIP5, ABAT, PLA2G6, GNAS, DOC2B, UNC13A, MIDN, FGFR1, PPFIA3, RAB3A, CPLX1, GLUD1, NNAT, BRSK2, PEX5L, SCRIB, RIMS4, RIMS3, NR1D1, GPR27, RAB11B, APBA2, APBA1, NOS1, TBX3, HTT, SYT11, KCNB1, NLGN2, CPT1A, …	66	0.000270256	3.56822
CA1	Downregulated	GOTERM_BP_FAT	GO:0010464~regulation of mesenchymal cell proliferation	CTNNBIP1, FGFR1, IRS2, PRRX1, LMNA, GAS1, SOX9, IRS1, FOXP1, CTNNB1, LRP5, MYCN	12	0.0170334	1.7687
CA1	Downregulated	GOTERM_BP_FAT	GO:0007163~establishment or maintenance of cell polarity	STK11, PTK7, BRSK2, ARHGAP35, WDR81, EPHB1, FBF1, LLGL1, SCRIB, IGF1R, SPRY2, NUMA1, GBF1, HEY1, ATN1, GSN, CRB2, LHX2, FAT1, DLG4, PKD1, MTCL1, DLG5, RAP2A, HTT, UST, LMNA, SIPA1L3, SLC9A3R1, MARK4, WNT7B, MYH9L1, WDR1	33	0.000529584	3.27607
CA1	Downregulated	GOTERM_BP_FAT	GO:0021543~pallium development	FGFR1, CDK5R1, CDK5R2, SOX2, BCAN, BCL2L1, XAB2, SRF, GLI3, CTNNB1, SLC32A1, IGF1R, GRIN2B, ROBO1, BCL2, LHX2, ATG7, DCLK2, LHX6, RARA, POU3F2, H2AFX, NR2F1, EGFR, DAB2IP, MDGA1, FUT10, GRIN1, PTPRS, SOCS7, NR4A3, ADGRG1, FLNA, BBS1, ASCL1, DLX2, LRP1, FOXG1, RELN, KDM6B	40	5.37567e-05	4.26957
CA1	Downregulated	GOTERM_BP_FAT	GO:0006612~protein targeting to membrane	PALM, PACS2, CDK5R1, MIEF2, KCNB1, SRP68, NFASC, CACNB1, ADORA1, GAS6, MICALL1, ANK1, GOLGA7B, ANK3, ATG4B, PEX16, TCAF1, PTCH1, MTCL1, AKT2	20	0.0181764	1.74049
CA1	Downregulated	GOTERM_BP_FAT	GO:0060996~dendritic spine development	PALM, CDK5R1, SRCIN1, CPEB3, BAIAP2, SLC12A5, CTNND2, NLGN2, NLGN3, ARID1B, SHANK1, EPHB3, ITPKA, EPHB1, SHANK3, EPHB2, NCK2, ARF1, PAK4, DLG4, RELN, CUX2, MTOR	23	0.000126008	3.8996
CA1	Downregulated	GOTERM_BP_FAT	GO:0009894~regulation of catabolic process	CPEB3, BTRC, PGAM1, RGP1, CBFA2T3, ADORA1, OS9, AKT1, USP19, BAG6, HSF1, GRIN2C, ATG7, DHX34, DDA1, AGAP2, AKT2, EGFR, GTPBP1, DAB2IP, ANKS1A, IRS2, WNT10B, BANP, SOCS5, IRS1, FLNA, RNF180, CLEC16A, ATG4B, TYSND1, KHSRP, UBB, NKD1, FZR1, APC2, USP5, EGLN2, EGLN1, SOX9, TIMP3, AZIN2, STUB1, MTM1, RGMA, OAZ1, TRIM67, TNRC6C, PKD1, DLGAP1, UPF1, RHBDF1, FURIN, ATP13A2, CPT1A, SGTA, SIRT2, HDAC4, PLK…	66	0.000759353	3.11956
CA1	Downregulated	GOTERM_BP_FAT	GO:0060074~synapse maturation	ANAPC2, PALM, SEZ6L2, DAB2IP, ERBB4, RELN, ADGRL1, NRXN1, SHANK1, SEZ6	10	0.000652427	3.18547
CA1	Downregulated	GOTERM_BP_FAT	GO:0050770~regulation of axonogenesis	MEGF8, ACHE, CDK5R1, PLXNA1, SSH1, STK11, TRPV2, ARHGAP35, EPHB3, CDH4, SRF, TTL, EPHB2, RGMA, ROBO1, SEMA7A, POU3F2, AGRN, PLXND1, DSCAM, AATK, ANAPC2, PLXNB1, LIMK1, UST, GRIN1, RTN4R, DPYSL2, NTN1, SLIT3, LOC100909750, SEMA6A, SEMA6B, SEMA4G, ULK1, SEMA4F, CNTN2, SMURF1, SEMA4D, SYNGAP1, LRP4, HDAC6	42	6.99406e-07	6.15527
CA1	Downregulated	GOTERM_BP_FAT	GO:0051090~regulation of sequence-specific DNA binding transcription factor activity	SIVA1, PPP2R5B, WFS1, GLIS2, CRTC1, HR, EGLN1, HSPA1A, KEAP1, SRF, CACTIN, ZIC2, CTNNB1, MEN1, AKT1, IGF1R, PRMT2, TRIM8, WWP2, PEX14, SIK1, TCF3, TRAF3, RNF31, DAB2IP, WNT10B, TAF6, CREBZF, ARID5B, CREBBP, FZD1, FZD2, FLNA, PPARGC1B, GAS6, PRKCB, HDAC5, JUP, CTNNBIP1, HDAC4, HIPK2, PPRC1, MAP3K10, PTCH1, RELN, ID3, CARM1, MAP3K13, LRP5, SMARCA4	50	0.0049326	2.30692
CA1	Downregulated	GOTERM_BP_FAT	GO:0007612~learning	ADCY3, JPH4, JPH3, FOSL2, CTNND2, SRF, EPHB2, PAK6, FOS, HRH3, GRIN2B, NRXN2, HTT, SLC12A5, GRIN1, ATP1A3, NLGN3, ATP1A2, NRXN1, SHANK1, SHANK3, LOC100909750, ATXN1, CNTN2, MAPK8IP2, C1QL1, CACNA1E, RELN, MTOR, SYNGAP1, APBB1, ABL2	32	0.000468026	3.32973
CA1	Downregulated	GOTERM_BP_FAT	GO:0070997~neuron death	WFS1, GRIK5, TLDC1, FOXO3, CTNNB1, HSF1, UNC5B, CLCF1, ATG7, GRID2, DNAJC5, AGAP2, EGR1, TYRO3, PTPRF, MAGI1, AARS, PIGT, ASCL1, HIPK2, FAIM2, PPP5C, MAP3K11, ACHE, CDK5R1, FGFR3, SSH1, EGLN2, EGLN1, BCL2L1, SNRK, ATN1, BCL2, AGT, AGRN, AATK, NOS1, HTT, KCNB1, GRIN1, FZD1, DPYSL4, NR4A3, LOC100909750, HYOU1, TBC1D24, HDAC4, LRP1, FYN, MTOR, SYNGAP1, F2R, SLC9A1, HDAC6	54	0.000929907	3.03156
CA1	Downregulated	GOTERM_BP_FAT	GO:0090287~regulation of cellular response to growth factor stimulus	GLG1, FGFR1, FKBP8, PDGFB, PPP2R5B, STK11, PPP2R5D, FAM20C, LEMD2, PRDM16, CTNNB1, MEN1, SPRY2, RGMA, CRB2, RNF165, AGT, BCL9L, HTRA3, HHIP, TCF4, FAM89B, BCL9, DAB2IP, PTPRF, SMAD6, SOX11, ZFP703, FZD1, ITGA3, SKI, FURIN, LOC100909750, PRKCB, NBL1, UBE2O, NOTCH1, ULK1, KCP, HIPK2, SMURF1, ADGRA2	42	0.000154032	3.81239
CA1	Downregulated	GOTERM_BP_FAT	GO:0043393~regulation of protein binding	PDGFB, MMP9, STUB1, MEN1, RGMA, EPHB6, HSF1, BCL2, PKD1, PEX14, AGRN, PLXND1, TRAF4, TFIP11, DAB2IP, PTPRF, TMBIM6, FLOT1, LOC100909750, CTNNBIP1, HDAC5, HDAC4, CSNK1E, HIPK2, AMFR, ZFPM1, CARM1, MAPRE3, ABL2, ADD2, ADD1, ADAM15	32	0.00471033	2.32695
CA1	Downregulated	GOTERM_BP_FAT	GO:0042176~regulation of protein catabolic process	BTRC, RGP1, CBFA2T3, OS9, AKT1, USP19, BAG6, GRIN2C, ATG7, DDA1, AGAP2, EGFR, ANKS1A, WNT10B, DAB2IP, BANP, SOCS5, FLNA, RNF180, CLEC16A, ATG4B, UBB, NKD1, FZR1, APC2, USP5, EGLN2, SOX9, STUB1, AZIN2, TIMP3, MTM1, RGMA, OAZ1, TRIM67, PKD1, DLGAP1, RHBDF1, ATP13A2, FURIN, SIRT2, SGTA, PLK3, CSNK1D, FYN, CSNK1E, DNAJB2, SMURF1, RNF40	49	0.00110737	2.95571
CA1	Downregulated	GOTERM_BP_FAT	GO:0045834~positive regulation of lipid metabolic process	IRS2, FGFR3, PDGFB, ADORA2B, ERBB4, EEF1A2, FDPS, STOML2, IGF2, NR4A3, MID1IP1, IRS1, CPT1A, AKT1, IGF1R, SORBS1, NR1D1, AGT, PLA2G6, MTOR, GPAM, SMPD3, AKT2, PC	24	0.0199953	1.69907
CA1	Downregulated	GOTERM_BP_FAT	GO:0042551~neuron maturation	ANKS1A, RND1, PDGFB, BCL2, SPTBN4, NFASC, CNTN2, CSPG4, C1QL1, DLG4, NRXN1, MTOR, ABL2	13	0.00745846	2.12735
CA1	Downregulated	GOTERM_BP_FAT	GO:0098742~cell-cell adhesion via plasma-membrane adhesion molecules	CADM3, CADM4, CLSTN3, CLSTN1, PCDHGA9, DSCAML1, CX3CL1, CLDN11, CDH4, DCHS1, CDH22, PCDH1, ROBO1, FAT1, GRID2, DSCAM, PTPRM, PCDHGA11, PTPRF, PCDH10, SDK2, NECTIN1, NECTIN2, PTPRT, CELSR2, PCDH7, CELSR1, NRXN1, IGSF9B, PCDHGB5, PCDHGB4, TENM4, CDH15, TENM2, TENM3, ADGRL1	36	0.00103106	2.98671
CA1	Downregulated	GOTERM_BP_FAT	GO:0035108~limb morphogenesis	FRAS1, MEGF8, FGFR1, PRRX1, JAG2, SOX9, GLI3, CTNNB1, ECE1, RNF165, SIK3, FLVCR1, RARG, TBX3, PCNT, SOX11, AFF3, SKI, GAS1, MYCN, NOTCH1, DLX5, GNAS, PTCH1, SP9, LRP4, SMARCA4, LRP5	28	0.0173623	1.76039
CA1	Downregulated	GOTERM_BP_FAT	GO:0045879~negative regulation of smoothened signaling pathway	WNT7B, FGFR3, KIF7, GLIS2, PTCH1, HHIP, GAS1, GLI3	9	0.0204505	1.6893
CA1	Downregulated	GOTERM_BP_FAT	GO:0014003~oligodendrocyte development	TENM4, ASCL1, FGFR3, WASF3, GSN, SOX11, FA2H, ZFP488, NKX6-2, CNTN2, HDAC11, ERCC2	12	0.00659422	2.18084
CA1	Downregulated	GOTERM_BP_FAT	GO:0090287~regulation of cellular response to growth factor stimulus	GLG1, FGFR1, FKBP8, PDGFB, PPP2R5B, STK11, PPP2R5D, FAM20C, LEMD2, PRDM16, CTNNB1, MEN1, SPRY2, RGMA, CRB2, RNF165, AGT, BCL9L, HTRA3, HHIP, TCF4, FAM89B, BCL9, DAB2IP, PTPRF, SMAD6, SOX11, ZFP703, FZD1, ITGA3, SKI, FURIN, LOC100909750, PRKCB, NBL1, UBE2O, NOTCH1, ULK1, KCP, HIPK2, SMURF1, ADGRA2	42	0.000154032	3.81239
CA1	Downregulated	GOTERM_BP_FAT	GO:0050679~positive regulation of epithelial cell proliferation	FGFR3, ERBB4, PDGFB, SOX9, ZFP580, CTNNB1, AKT1, PPP1R16B, HRH3, AGAP2, EGFR, HYAL1, EGR3, DAB2IP, EGFL7, SOX11, FLT4, ZFP703, NR4A1, NR4A3, GAS1, PTPRN, RPTOR, FOXP1, NOTCH1, DLX5, MTOR, HDAC6	28	0.0277086	1.55738
CA1	Downregulated	GOTERM_BP_FAT	GO:0007193~adenylate cyclase-inhibiting G-protein coupled receptor signaling pathway	GNAZ, ADCY3, S1PR3, HTR1B, SSTR2, CASR, GNAI2, GPR37, ADCY5, ADCY6, ADORA1, PTGDR2	15	0.0239526	1.62065
CA1	Downregulated	GOTERM_BP_FAT	GO:0008219~cell death	DLC1, GDF1, STAT5B, TLDC1, CIAPIN1, ADORA1, CTNNB1, PGR, ATCAY, BRINP1, GRIN2B, MAP3K9, GRID2, RARA, PELI3, TYRO3, ACAA2, WNT10B, DAB2IP, RARG, PTPRF, MAGI1, RXRA, AARS, TMEM132A, PIM2, BCL2L13, NME3, MNT, SIVA1, CDK5R1, ERBB4, ALDOC, HSPA1A, BCL2L2, BCL2L1, EPHB1, SCRIB, ATN1, AGRN, SMAD6, PCNT, SMAD1, GAS1, EPHA2, GAS6, HYOU1, NOTCH1, CSRNP3, SLC9A1, ADAR, SH3RF1, PPARD, LZTS2, NUAK2, HIP1R, TR…	204	0.00267871	2.57207
CA1	Downregulated	GOTERM_BP_FAT	GO:0007616~long-term memory	EGR1, GRIN2B, CPEB3, GLUD1, GRIN1, RELN, MTOR, EHMT2, SHANK1, SRF	10	0.0340846	1.46744
CA1	Downregulated	GOTERM_BP_FAT	GO:0043401~steroid hormone mediated signaling pathway	ESRRA, PPARD, RARG, RXRA, NR4A1, ABHD2, NR4A3, PAQR9, RORA, PGR, NR1D1, NR2F6, RARA, NR2F1	26	0.0308032	1.5114
CA1	Downregulated	GOTERM_BP_FAT	GO:0007010~cytoskeleton organization	DLC1, PDGFB, TUBB2B, PDLIM7, TUBB2A, WDR81, ITPKA, TTL, CTNNB1, PACSIN1, SLC16A1, CUL7, ANK3, CCSAP, CUL9, BCR, ACTN4, BAIAP2, PDXP, BSN, ACTN1, SIPA1L3, MARK4, BICD2, DCTN1, PPARGC1B, FRY, RND1, NAV1, FLII, CLIP2, MAP7D1, ADD2, SPTB, ADD1, CCDC8, PALM, CDK5R1, MOB2, SSH1, ELN, DAG1, PTK7, SOX9, SRF, LLGL1, CDC42EP1, SAC3D1, RAC3, OBSL1, AGRN, TUBB4A, ARHGDIA, ARHGEF10L, LURAP1, TAOK2, HTT, PCNT,…	160	3.12138e-09	8.50565
CA1	Downregulated	GOTERM_BP_FAT	GO:0045685~regulation of glial cell differentiation	MAG, FGFR3, DAG1, SIRT2, CTNNB1, MYCN, TENM4, DLX2, LINGO1, NOTCH1, CLCF1, NKX6-2, ZFP488, CNTN2, MTOR, WDR1	16	0.014176	1.84845
CA1	Downregulated	GOTERM_BP_FAT	GO:0007215~glutamate receptor signaling pathway	CDK5R1, GNAI2, GRIK3, KCNB1, GRIN1, GRIK5, ATP1A3, CACNG4, NLGN2, NLGN3, NRXN1, GRIN3A, SHANK1, SHANK3, GRIN2B, CNIH2, FYN, GRIN2C, GRIN2D, GRID2, MAPK8IP2, DLG4, RELN, UNC13A	24	1.37444e-06	5.86187
CA1	Downregulated	GOTERM_BP_FAT	GO:0060349~bone morphogenesis	GLG1, ALPL, MEGF8, FGFR3, RARG, INPPL1, LTBP3, SKI, SOX9, SERPINH1, GLI3, FOXN3, MEF2D, DLX5, RARA, GNAS, COL1A1, CARM1, SIK3, LRP5	20	0.00758241	2.12019
CA1	Downregulated	GOTERM_BP_FAT	GO:0030879~mammary gland development	ORAI1, ERBB4, BTRC, STAT5B, ARHGAP35, CAD, SOX9, GLI3, SCRIB, PGR, IGF1R, ATP2B2, ROBO1, FASN, AGAP2, IRS2, TBX3, ZFP703, IRS1, NTN1, EPHA2, DDR1, WNT7B, PYGO2, PTCH1, NCOR2, LRP5	27	0.0221538	1.65455
CA1	Downregulated	GOTERM_BP_FAT	GO:0008038~neuron recognition	MEGF8, CDK5R1, DYNLL2, ROBO1, FOXG1, CNTN2, DSCAML1, ARHGAP35, EPHB3, GAP43, DSCAM, EPHB2	12	0.00123284	2.90909
CA1	Downregulated	GOTERM_BP_FAT	GO:0001941~postsynaptic membrane organization	MAGI2, SSH1, NRXN2, DLG4, NLGN2, NLGN3, RELN, AGRN, NRXN1, SHANK3, LRP4, LRP5	12	0.00209079	2.67969
CA1	Downregulated	GOTERM_BP_FAT	GO:0021548~pons development	ASCL1, CDK5R1, CDK5R2, BCL2, GRIN1, SCRIB	6	0.0417135	1.37972
CA1	Downregulated	GOTERM_BP_FAT	GO:0010563~negative regulation of phosphorus metabolic process	SLC27A1, PDGFB, SRCIN1, NCS1, LEMD2, CBFA2T3, WDR81, CACTIN, SPRY4, MEN1, AKT1, SPRY2, SHB, HTR1B, CRY2, SPRED2, SPRED3, CTDSP2, PPP1R37, DAB2IP, IRS2, INPPL1, CAMSAP3, WNK2, SOCS5, SLC9A3R1, TMEM132D, PPM1F, SSTR4, NCK2, SEMA4D, PPP5C, CCDC8, MIDN, PALM, ELL, DAG1, EGLN1, TIMP3, FEM1A, IGF1R, PPP1R16B, HRH3, HEXIM1, PER1, MLLT1, FLRT1, NOS1, SMAD6, PTPA, RTN4R, WWTR1, CAMK2N2, CAMK2N1, SIRT2, MP…	71	0.0129513	1.88769
CA1	Downregulated	GOTERM_BP_FAT	GO:0060425~lung morphogenesis	SPRY2, WNT7B, STK40, SOX11, TNC, SOX2, DAG1, MAPK8IP3, DLG5, HHIP, CELSR1, SOX9, SRF, CTNNB1	14	0.0455321	1.34168
CA1	Downregulated	GOTERM_BP_FAT	GO:0035904~aorta development	LTBP1, NDST1, SMAD6, EFNB2, ELN, JAG1, TAB1, SRF, NOTCH1, LRP1, HEY1, KIF7, PLXND1, LOXL1, SMARCA4	15	0.0059291	2.22701
CA1	Downregulated	GOTERM_BP_FAT	GO:0006612~protein targeting to membrane	PALM, PACS2, CDK5R1, MIEF2, KCNB1, SRP68, NFASC, CACNB1, ADORA1, GAS6, MICALL1, ANK1, GOLGA7B, ANK3, ATG4B, PEX16, TCAF1, PTCH1, MTCL1, AKT2	20	0.0181764	1.74049
CA1	Downregulated	GOTERM_BP_FAT	GO:1902893~regulation of pri-miRNA transcription from RNA polymerase II promoter	HDAC4, FOS, PPARD, PDGFB, SMAD6, SMAD1, SOX9, SRF, SMARCA4	9	0.0375428	1.42547
CA1	Downregulated	GOTERM_BP_FAT	GO:0008544~epidermis development	KAZN, FGFR1, PPARD, FOSL2, JAG2, CTNND1, KEAP1, JAG1, SOX9, SCRIB, CTNNB1, IGF1R, ACVR1B, ATP2B2, HEY1, BCL2, LHX2, GAB1, POU3F2, USH2A, ERCC2, MAFG, EGFR, WNT10A, SATB1, WNT10B, LDB1, FA2H, AARS, CELSR1, SLC9A3R1, WHRN, EPHA2, MYCN, NOTCH1, GNAS, PTCH1, LRP4, SMARCA4	39	0.0202007	1.69463
CA1	Downregulated	GOTERM_BP_FAT	GO:0008593~regulation of Notch signaling pathway	PEAR1, EGFL7, DTX1, CHAC1, SOX2, JAG2, DLK2, TSPAN15, JAG1, LLGL1, ASCL1, SLC35C1, DLX2, NOTCH1, HEY1	15	0.0338704	1.47018
CA1	Downregulated	GOTERM_BP_FAT	GO:2000648~positive regulation of stem cell proliferation	HDAC5, SOX10, NOTCH1, TBX3, LTBP3, SOX11, SETD1B, FOXG1, SOX2, CX3CL1, GLI3, CTNNB1	12	0.0263133	1.57983
CA1	Downregulated	GOTERM_BP_FAT	GO:0015012~heparan sulfate proteoglycan biosynthetic process	EXTL3, NDST1, XYLT1, HS6ST3, HS6ST2, HS6ST1, EXT1, CTNNB1	8	0.0195789	1.70821
CA1	Downregulated	GOTERM_BP_FAT	GO:0030510~regulation of BMP signaling pathway	FKBP8, SMAD6, SOX11, LEMD2, FZD1, SKI, ITGA3, LOC100909750, NBL1, RGMA, UBE2O, NOTCH1, RNF165, CRB2, HIPK2, KCP, HTRA3	17	0.03166	1.49949
CA1	Downregulated	GOTERM_BP_FAT	GO:0042593~glucose homeostasis	CASR, STK11, WFS1, GRIK5, HK1, FOXO3, GPRC5B, SIDT2, VGF, KCNJ11, SRF, MEN1, AKT1, IGF1R, SLC16A1, CRY2, GPR27, BCL2, ATG7, RAB11B, HECTD4, PIK3R2, ASPSCR1, IRS2, POLG, PTPRN2, KCNB1, RPH3AL, PTPRN, GAS6, RAB11FIP5, PLA2G6, CACNA1E, PTCH1, AACS, NCOR2, SMARCA4	37	0.0243567	1.61338
CA1	Downregulated	GOTERM_BP_FAT	GO:0008593~regulation of Notch signaling pathway	PEAR1, EGFL7, DTX1, CHAC1, SOX2, JAG2, DLK2, TSPAN15, JAG1, LLGL1, ASCL1, SLC35C1, DLX2, NOTCH1, HEY1	15	0.0338704	1.47018
CA1	Downregulated	GOTERM_BP_FAT	GO:0016311~dephosphorylation	DLC1, BTRC, PLPPR2, TIMM50, PLPPR3, ADORA1, WDR81, CRY2, SYNJ2, CTDSP2, PPP4C, NUDT16, SYMPK, PPP1R37, MAGI2, PTPRM, PTPRF, PFKL, INPPL1, PTPRN2, PDXP, PTPRS, CAMSAP3, PTPRT, PTPRU, PTPDC1, TMEM132D, PPARGC1B, PPM1F, PPM1H, SEMA4D, PPP5C, CCDC8, ALPL, PPP2R3B, SSH1, ELL, MTM1, MTMR3, PPP1R16B, MTMR1, BCL2, PPP2R2C, INPP5A, MTMR4, HTT, PTPA, PTPN13, TAB1, LHPP, MPRIP, ELFN1, ELFN2, CSRNP3, PPP1R8,…	56	0.017092	1.76721
CA1	Downregulated	GOTERM_BP_FAT	GO:0021772~olfactory bulb development	FGFR1, DLX2, ERBB4, ROBO1, PCNT, EFNA2, LHX2, SKI, DPYSL2, EXT1, SRF, SLIT3	12	0.00808133	2.09252
CA1	Downregulated	GOTERM_BP_FAT	GO:0010506~regulation of autophagy	LZTS1, STK11, U2AF2, TFEB, AKT1, MTM1, MTMR3, TRIM8, BCL2, ATG7, MTCL1, QSOX1, PIK3R2, SOGA1, SOGA3, ZDHHC8, WDR6, EHMT2, ATP13A2, SIRT2, SREBF2, TBC1D25, CLEC16A, SH3BP4, ULK1, ATP6V0A1, MTOR, ABL2, TP53INP2, FBXL2, PIP4K2B	31	0.0282568	1.54888
CA1	Downregulated	GOTERM_BP_FAT	GO:0051386~regulation of neurotrophin TRK receptor signaling pathway	SPRY2, PTPRF, PPP2R5B, ULK1, AGT, PPP2R5D	6	0.0203801	1.69079
CA1	Downregulated	GOTERM_BP_FAT	GO:0001667~ameboidal-type cell migration	FGFR1, MEGF8, PPARD, PDGFB, ERBB4, BCAR1, MMP9, SOX9, SRF, SOX8, ZFP580, AKT1, ACVR1B, ROBO1, AGT, SEMA7A, CYGB, PLXND1, SOX10, HYAL1, SASH1, SLC8A1, DAB2IP, EGR3, PTPRM, TMEM201, EFNB1, FLT4, ARID5B, EFNB2, NR4A1, ITGA3, VASH1, FOXP1, EPHA2, PPM1F, HDAC5, SEMA6A, SEMA6B, NOTCH1, TNS1, SEMA4G, SEMA4F, MYH9L1, SEMA4D, ADGRA2, LRP5	47	0.0131258	1.88187
CA1	Downregulated	GOTERM_BP_FAT	GO:0021544~subpallium development	BBS1, ASCL1, DLX2, HTT, HPRT1, GLI3, SHANK3, FOXP1	8	0.0477471	1.32105
CA1	Downregulated	GOTERM_BP_FAT	GO:0001655~urogenital system development	LZTS2, PDGFB, WFS1, MMP9, JAG1, GLI3, CTNNB1, BAG6, HEY1, RARA, DLG5, EGR1, MAGI2, RARG, ARID5B, SOX11, RXRA, EFNB2, MMP17, CTNNBIP1, PYGO2, FRAS1, FGFR1, STK11, TNC, GLIS2, CTNND1, EPHB3, SOX9, SOX8, DCHS1, GPR4, EPHB2, IGF1R, LAMB2, AGT, BCL2, PKD1, PCNT, SMAD6, ITGA3, NID1, SMAD1, AMPD2, WWTR1, HDAC5, NOTCH3, WNT7B, NOTCH1, JMJD6, GDF11, PTCH1, ID3, LRP4	54	0.00554033	2.25646
CA1	Downregulated	GOTERM_BP_FAT	GO:0007585~respiratory gaseous exchange	RAB3A, NDST1, FLT4, GRIN1, JAG2, NLGN2, NLGN3, ATP1A2, ADORA1, STK40, CHRNA4, MAPK8IP3, TRAF4	13	0.0149298	1.82595
CA1	Downregulated	GOTERM_BP_FAT	GO:0071496~cellular response to external stimulus	CASR, LTBP1, NUAK2, PDGFB, ADORA2B, MMP9, TNC, DAG1, ARHGAP35, GCN1L1, SOX9, SRF, CTNNB1, AKT1, IGF1R, FOS, MTMR3, SLC1A2, MAP1LC3A, GRIN2B, BCL2, AGT, ATG7, AFAP1, ARHGDIA, EGFR, EGR1, MAG, NOS1, KCNB1, FZD1, IGF2, FZD2, ATP1A2, EHMT2, RPTOR, SIRT2, GAS6, SREBF2, HDAC4, ULK1, ATG4B, MYH9L1, COL1A1, MTOR, KIF26A	46	0.0140572	1.8521
CA1	Downregulated	GOTERM_BP_FAT	GO:0001738~morphogenesis of a polarized epithelium	DVL3, RAP2A, NKD1, PTK7, FZD1, CTNND1, CELSR1, FZD2, SLC9A3R1, LOC100909750, WNT7B, DLG5, WDR1, ABL2	14	0.0363281	1.43976
CA1	Downregulated	GOTERM_BP_FAT	GO:0030001~metal ion transport	MCHR1, KCNC1, JPH4, CASR, JPH3, CHERP, KCNAB3, PDGFB, WFS1, ATP1B2, TRPV2, NCS1, STOML2, GRIN3A, KCNJ12, KCNK12, ADORA1, KCNJ11, KCNJ14, CTNNB1, AKT1, ATP2B2, HTR1B, KCNK9, STAC, GRIN2B, WWP2, ANK3, SLC24A3, NIPAL3, CHRNA4, SIK1, KCNQ2, KCNG4, AKT2, SLC4A5, RAMP3, SLC12A9, SCN2B, KCND1, NECTIN1, CACNG4, WNK2, SLC9A3R1, PRKCB, SLC41A1, PLA2G6, GNAS, KCNH2, ORAI1, GNAI2, CACNB1, CACNB3, BCL2, AGT, …	96	0.0112562	1.94861
CA1	Downregulated	GOTERM_BP_FAT	GO:0038127~ERBB signaling pathway	EGFR, DAB2IP, PTPRF, BCAR1, MMP9, RHBDF1, AFAP1L2, SOCS5, SOX9, ADORA1, LOC100909750, RNF126, AGT, GAB1, RASSF2, SHC3, ABL2, MVB12B	18	0.0418312	1.3785
CA1	Downregulated	GOTERM_BP_FAT	GO:0006865~amino acid transport	SLC36A1, HTT, SLC6A11, NFKBIE, SLC6A20, SLC6A17, SLC7A4, SLC7A5, SLC1A4, SLC32A1, SLC6A9, SLC1A2, HRH3, SLC7A1, SLC25A22, ABAT, SLC13A3, SLC43A2, APBA1	19	0.0261684	1.58222
CA1	Downregulated	GOTERM_BP_FAT	GO:0046580~negative regulation of Ras protein signal transduction	DLC1, SPRY2, RASAL1, DAB2IP, TRIM67, ADRA1A, ITGA3, ARHGAP35, RASA3, SYNGAP1, ABL2	11	0.0467376	1.33033
CA1	Downregulated	GOTERM_BP_FAT	GO:0060534~trachea cartilage development	RARG, RARA, SOX9, SRF	5	0.0375423	1.42548
CA1	Downregulated	GOTERM_BP_FAT	GO:0050679~positive regulation of epithelial cell proliferation	FGFR3, ERBB4, PDGFB, SOX9, ZFP580, CTNNB1, AKT1, PPP1R16B, HRH3, AGAP2, EGFR, HYAL1, EGR3, DAB2IP, EGFL7, SOX11, FLT4, ZFP703, NR4A1, NR4A3, GAS1, PTPRN, RPTOR, FOXP1, NOTCH1, DLX5, MTOR, HDAC6	28	0.0277086	1.55738
CA1	Downregulated	GOTERM_BP_FAT	GO:1902582~single-organism intracellular transport	CHERP, SRP68, PEX6, STOML2, TIMM50, ZIC1, WDR81, GLI3, ADORA1, RTN2, AKT1, CRY2, ANK1, ANK3, AGAP3, AKT2, NOL6, EGFR, PLD2, DAB2IP, BCR, TMEM201, ACTN4, MIEF2, SLC9A3R1, BICD2, FLNA, JUP, ATG4B, IPO4, KPNA6, UBB, PALM, PACS2, CDK5R1, ADORA2B, APC2, ERBB4, NFKBIB, CACNB1, DAG1, ABCA2, KEAP1, KLC2, PEX5L, NUP214, POM121, KLC1, AGT, PEX16, PEX14, PKD1, AP3D1, MTCL1, TNPO2, ING1, FAM89B, PIK3R2, HTT,…	80	0.00034411	3.4633
CA1	Downregulated	GOTERM_BP_FAT	GO:0031641~regulation of myelination	TENM4, AKT1, MAG, RARG, WASF3, RXRA, DAG1, RARA, MTOR, SIRT2, CTNNB1	11	0.0186948	1.72828
CA1	Downregulated	GOTERM_BP_FAT	GO:0035640~exploration behavior	BRINP1, JPH3, DLG4, CHRNA4, NLGN2, ABAT, ITGA3, ABL2, SHANK3	9	0.0375428	1.42547
CA1	Downregulated	GOTERM_BP_FAT	GO:0000271~polysaccharide biosynthetic process	IRS2, PDGFB, B4GAT1, NDST1, IGF2, IRS1, AKT1, SORBS1, NR1D1, AP2A1, GYS1, MTOR, EXT1, AKT2	14	0.0284428	1.54603
CA1	Downregulated	GOTERM_BP_FAT	GO:0015012~heparan sulfate proteoglycan biosynthetic process	EXTL3, NDST1, XYLT1, HS6ST3, HS6ST2, HS6ST1, EXT1, CTNNB1	8	0.0195789	1.70821
CA1	Downregulated	GOTERM_BP_FAT	GO:0042177~negative regulation of protein catabolic process	EGFR, ANKS1A, DAB2IP, BANP, RGP1, TIMP3, AZIN2, FURIN, SIRT2, FLNA, OS9, MTM1, CLEC16A, USP19, BAG6, FYN, GRIN2C, AGAP2	18	0.0383121	1.41666
CA1	Downregulated	GOTERM_BP_FAT	GO:0051051~negative regulation of transport	SRCIN1, MMP9, PNKD, RANGAP1, ADORA1, KCNJ11, OS9, AKT1, HTR1B, PACSIN1, CRY2, WWP2, ANK3, ATG7, DLG4, AKT2, SCAMP5, ACAA2, DAB2IP, IRS2, BCR, PFKL, MADD, SLC9A3R1, IRS1, RPTOR, PRKCB, RAB11FIP5, ABAT, GNAS, KCNH2, MIDN, APC2, NFKBIB, KEAP1, HSPA1A, CX3CL1, OAZ1, HRH3, BCL2, PKD1, AGRN, KCNE5, FAM89B, GNAO1, NOS1, SYT11, KCNB1, TMBIM6, RHBDF1, FZD1, CBARP, ATP1A2, WWTR1, GAS6, SREBF2, ATXN2, NOTCH…	62	0.037574	1.42511
CA1	Downregulated	GOTERM_BP_FAT	GO:0002028~regulation of sodium ion transport	SLC8A1, NOS1, SCN2B, ATP1B2, SPTBN4, ATP1A2, WNK2, SLC9A3R1, AKT1, ARF1, ANK3, PER1, GNAS, AGRN, SIK1, MLLT6, AKT2, SNTA1, SLC9A1	19	0.00374666	2.42636
CA1	Downregulated	GOTERM_BP_FAT	GO:0061005~cell differentiation involved in kidney development	GLIS2, PTCH1, GLI3	12	0.040066	1.39722
CA1	Downregulated	GOTERM_BP_FAT	GO:0045879~negative regulation of smoothened signaling pathway	WNT7B, FGFR3, KIF7, GLIS2, PTCH1, HHIP, GAS1, GLI3	9	0.0204505	1.6893
CA1	Downregulated	GOTERM_BP_FAT	GO:0007155~cell adhesion	DLC1, CADM3, CADM4, ATP1B2, STAT5B, STOML2, RANGAP1, H1FX, RORA, CTNNB1, CDH22, SHB, GRID2, RARA, TYRO3, PLD2, DAB2IP, PTPRM, PTPRF, EFNB1, EFNB2, PTPRS, PTPRT, PTPRU, JUP, RND1, SCYL1, RCC2, ZNHIT1, ABAT, LAMC1, ADD1, CDK5R1, DAG1, EPHB3, SCRIB, EPHB1, EPHB6, LAMB2, CDC42EP1, RAC3, ZAP70, TCF3, TAOK2, SMAD6, PCDH10, CREBBP, CELSR2, CELSR1, EPHA2, GAS6, EMILIN1, NOTCH3, NOTCH1, PKP1, LASP1, PPARD…	200	2.20434e-10	9.65672
CA1	Downregulated	GOTERM_BP_FAT	GO:0003279~cardiac septum development	DVL3, LTBP1, NDST1, TBX3, SOX11, SMAD6, PTK7, FZD1, EGLN1, FZD2, JAG1, TAB1, NOTCH1, LRP1, KIF7, HEY1, ROBO1, RARA, ZFPM1, PLXND1, SMARCA4	21	0.0166336	1.77901
CA1	Downregulated	GOTERM_BP_FAT	GO:0071436~sodium ion export	SLC8A1, ATP1B2, ATP1A3, AGRN, ATP1A2, SLC9A1	6	0.0417135	1.37972
CA1	Downregulated	GOTERM_BP_FAT	GO:0007346~regulation of mitotic cell cycle	MAD1L1, PDGFB, STAT5B, RPRM, TTC28, CTNNB1, AKT1, SHB, BRINP1, PRMT2, CUL7, GBF1, CUL9, CCSAP, CTDSP2, BRD4, SIK1, EGFR, WNT10B, PDXP, PIM2, SLC9A3R1, FOXN3, ASCL1, RCC2, FOXG1, CCDC8, FGFR1, PPP2R3B, FGFR3, AFAP1L2, BCL2L1, SCRIB, IGF1R, BCL2, PKD1, OBSL1, SH2B1, TCF3, ERCC2, NACC2, EME2, CREBBP, IGF2, GAS1, LOC100909750, PLK3, TOM1L2, PTCH1, CIT, RNF40, LRP5	52	0.0316424	1.49973
CA1	Downregulated	GOTERM_BP_FAT	GO:0071436~sodium ion export	SLC8A1, ATP1B2, ATP1A3, AGRN, ATP1A2, SLC9A1	6	0.0417135	1.37972
CA1	Downregulated	GOTERM_BP_FAT	GO:0030705~cytoskeleton-dependent intracellular transport	TMEM201, ACTN4, HTT, SUN2, KLC2, KIF3C, BICD2, WDR81, MYO10, KIF1A, CNIH2, KLC1, PEX14, AP3D1, RHOT2, UBB, KIF26A, HDAC6	18	0.0261198	1.58303
CA1	Downregulated	GOTERM_BP_FAT	GO:0030258~lipid modification	PPARD, PIP5K1C, PLPPR2, PLPPR3, AUH, AKT1, MTM1, MTMR3, MTMR1, AGT, SYNJ2, CYGB, CERK, IP6K1, ETFB, INPP5A, AKT2, EFR3B, PIK3R2, ACAA2, IRS2, INPPL1, FA2H, TTC7B, NR4A3, IRS1, CPT1A, SLC35C1, TYSND1, MTOR, PIP4K2B	31	0.0161096	1.79292
CA1	Downregulated	GOTERM_CC_DIRECT	GO:0005578~proteinaceous extracellular matrix	GLG1, ALPL, WNT5B, LTBP1, SPOCK2, LTBP4, MMP9, TNC, ELN, BCAN, TIMP3, MMP24, GPC6, AGRN, VWA1, LOXL1, GFOD2, SPON1, TFIP11, WNT10A, WNT10B, HAPLN4, OLFML2A, NID1, PAPLN, NID2, NTN1, EMILIN1, SLIT3, WNT7B, NAV2, RELN, LAMC1, COL1A1, NEWGENE_621351, NCAN, ADAMTS2, ADAMTS4	38	0.0134736	1.87052
CA1	Downregulated	GOTERM_CC_DIRECT	GO:0005874~microtubule	KIFC2, LZTS2, TUBB2B, TUBB2A, WDR81, TTLL1, MAP1LC3A, KLC1, DYNLL2, CAMSAP1, TUBB5, DCLK2, TUBA1A, DYNC1H1, KIF21B, TUBB3, TUBB4A, SLC8A1, MAP1A, DPYSL2, MID1IP1, KIF3C, DCTN1, SIRT2, EML2, SARM1, EML1, NCOA2, MAP1S, TPPP, KIF19, MAP6, KATNAL1, MAPRE3, MAP3K11	35	0.0267094	1.57334
CA1	Downregulated	GOTERM_CC_FAT	GO:0097458~neuron part	LTBP1, SYT5, EFNA2, SYT3, RANGAP1, GRIN3A, WDR81, ADORA1, CTNNB1, PGR, ATP2B2, ATCAY, BRINP1, HTR1B, KCNK9, GRIN2B, GRIN2C, CCSAP, GRID2, CHRNA4, RARA, PLD2, DAB2IP, MAGI2, BCR, PTPRF, POLG, RXRA, BSN, PTPRN, MARK4, RPTOR, SSTR4, SSTR2, HEPACAM, BACE1, ABAT, AMFR, DOC2B, UNC13A, ADD2, ADD1, PALM, ORAI1, CDK5R1, ERBB4, GNAI2, MOB2, CRTC1, ALDOC, DAG1, BCL2L1, PEX5L, RIMS4, SCRIB, EPHB1, EPHB2, RIM…	287	1.18041e-28	27.928
CA1	Downregulated	GOTERM_CC_FAT	GO:0044456~synapse part	SRCIN1, SYT5, GRIK3, SYT3, GRIK5, GRIN3A, ITPKA, ADORA1, CALB2, PGR, PACSIN1, KCNK9, ANK1, GRIN2B, GRIN2C, ANK3, GRIN2D, GRID2, CHRNA4, TMUB1, DNAJC5, SCAMP5, PLD2, BCR, MAGI2, MADD, POLG, PTPRN2, BAIAP2, BSN, ACTN1, PTPRN, DOC2B, ADD2, UNC13A, ADD1, PALM, CDK5R1, ACHE, ERBB4, BCL2L1, CX3CL1, SCRIB, RIMS4, RIMS3, SLC32A1, LRFN1, HCN4, LRFN3, HTT, KCNB1, SYT11, FBXO2, GRIN1, ITGA3, SLC6A17, SHANK1…	134	1.60982e-14	13.7932
CA1	Downregulated	GOTERM_CC_FAT	GO:0098794~postsynapse	LZTS1, SRCIN1, CLSTN3, GRIK3, CLSTN1, NCS1, GRIK5, GRIN3A, ITPKA, ADORA1, PGR, SLC1A2, ANK1, GRIN2B, ANK3, GRIN2C, GRIN2D, DLG4, GRID2, TMUB1, CHRNA4, BCR, MAGI2, BAIAP2, ACTN1, BSN, NCK2, NCOA2, EPB41L1, SEMA4F, SEZ6, FAIM2, GAP43, ADD2, ADD1, PALM, CDK5R1, ACHE, ERBB4, CTNND2, CTNND1, CX3CL1, SCRIB, NR1D1, ARHGAP44, LRFN1, LRFN3, APBA1, SYNPO, ACTB, DLGAP1, SLC8A1, NOS1, DLGAP3, DLGAP2, HTT, KC…	84	7.54037e-09	8.12261
CA1	Downregulated	GOTERM_CC_FAT	GO:0030427~site of polarized growth	ORAI1, CDK5R1, SSH1, EXOC8, FRYL, TRPV2, PREX1, CTNND1, KLC1, RAC3, AGRN, KIF21B, DSCAM, AATK, PTPRF, LIMK1, NECTIN1, RTN4R, CBARP, DPYSL3, ITGA3, DPYSL2, NRXN1, WHRN, KIF3C, FLNA, SIRT2, FRY, LOC100909750, CSNK1E, TENM2, TMOD2, PTCH1, AMFR, TNK2, MYH14, MAPK8IP1, ADGRL1, APBB1, GAP43	40	2.84429e-05	4.54603
CA1	Downregulated	GOTERM_CC_FAT	GO:0030054~cell junction	PRX, LZTS1, SRCIN1, SYT5, GRIK3, CLSTN1, GRIK5, NCS1, GRIN3A, SYNGR1, FRRS1L, CTNNB1, ATCAY, ATP2B2, PACSIN1, GRIN2B, GRIN2C, GRIN2D, SNPH, DLG4, GRID2, CHRNA4, TMUB1, CDK16, IMPDH1, SAMD4A, SCAMP5, DSCAM, MAGI1, PTPRN2, ACTN1, BSN, NRXN1, PTPRN, GNAS, NEU1, SEZ6, UNC13A, FAIM2, GAP43, KAZN, STON2, ACHE, BCL2L1, AFAP1L1, SCRIB, RIMS4, RIMS3, ATN1, ARHGAP44, FAT1, LRFN1, RAB11B, AGRN, LRFN3, DLGAP…	189	6.98771e-09	8.15566
CA1	Downregulated	GOTERM_CC_FAT	GO:0033267~axon part	KCNC1, CASR, GRIK3, TRPV2, GRIK5, CAD, RANGAP1, SYNGR1, ADORA1, KCNJ11, WDR81, CALB2, PGR, SLC1A2, PACSIN1, ANK1, GRIN2B, ANK3, ROBO1, DLG4, SYNJ2, CNTNAP1, DNAJC5, KCNQ2, USH2A, DAB2IP, LIMK1, POLG, PTPRN2, NRXN1, PTPRN, CNTN2, UNC13A, EPN1, RAB3A, CPLX1, DAG1, SLC32A1, AP3D1, AGRN, HCN4, HCN3, TUBB4A, PRSS12, AATK, MAG, SYT11, SPTBN4, GRIN1, NFASC, RTN4R, DPYSL2, SIRT2, TBC1D24, PNOC, BLVRB, MA…	63	1.72675e-06	5.76277
CA1	Downregulated	GOTERM_CC_FAT	GO:0070161~anchoring junction	DLC1, MPZL1, CADM3, CADM4, PDLIM7, SRCIN1, SRP68, CSPG4, RANGAP1, H1FX, TSPAN9, JAG1, CTNNB1, SLC4A2, EGFR, DAB2IP, PTPRM, MAGI1, ACTN4, BAIAP2, EFNB2, ACTN1, LYPLA2, EEF2, JUP, RND1, TNS1, SCYL1, ADD1, KAZN, PTK7, DAG1, KEAP1, HSPA1A, SCRIB, CDC42EP1, RPL6, SPTBN4, ITGA3, CSRP2, EPHA2, MPRIP, NOTCH3, HYOU1, NOTCH1, ARF1, PKP1, MYH9L1, LASP1, SPTBN2, TNK2, DNAJB1, SLC9A1, TLN2, BCAR1, PIP5K1C, ZF…	100	3.29998e-05	4.48149
CA1	Downregulated	GOTERM_CC_FAT	GO:0031252~cell leading edge	DLC1, KCNC1, SH3RF1, WASF3, PDLIM7, SRCIN1, TLN2, BCAR1, TRPV2, CSPG4, WWC1, PIP5K1C, MTSS1L, ADORA1, KCNJ11, CTNNB1, SLC1A2, PACSIN1, ANK1, GBF1, ROBO1, GSN, SYNJ2, AKT2, PLD2, PTPRM, INPPL1, LDB1, BAIAP2, FLOT1, PDXP, ACTN1, SLC9A3R1, DCTN1, GNAS, PALM, SSH1, APC2, DAG1, CTNND1, SCRIB, CDC37, MTM1, ATN1, ARHGAP44, FAT1, PLXND1, KCNB1, GRIN1, SLC12A5, ARFIP2, PTPN13, DPYSL3, EPHA2, GDPD2, LOC100…	65	1.09502e-05	4.96058
CA1	Downregulated	GOTERM_CC_FAT	GO:0044304~main axon	KCNC1, MAG, SPTBN4, NFASC, DAG1, KCNJ11, ADORA1, SIRT2, SLC1A2, ANK1, ROBO1, ANK3, CNTN2, DLG4, MAPK8IP3, CNTNAP1, KCNQ2, APBB1, TUBB4A	19	0.00400556	2.39734
CA1	Downregulated	GOTERM_CC_FAT	GO:0042383~sarcolemma	PLD2, SLC8A1, NOS1, ADCY5, KCNB1, FLOT1, ADCY6, DAG1, ATP1A3, CACNB1, ACTN1, CACNB3, ATP1A2, KCNJ12, KCNJ11, RTN2, IGF1R, ANK1, STAC, ANK3, ADRA1A, GNAS, AGRN, FKRP, SNTA1, SLC9A1, PLEC	27	0.030422	1.51681
CA1	Downregulated	GOTERM_CC_FAT	GO:0005773~vacuole	SLC22A17, SLC36A1, SLC9A7, PLEKHM2, PLEKHM1, SYT5, ADCY5, SYT3, ADCY6, VPS52, TLDC1, SIDT2, AMOTL2, TBC1D16, STARD3, DIRC2, PACSIN1, ANK3, TRAK1, TMUB1, DNAJC5, SCAMP5, MVB12B, EGFR, ATG9A, MAGI2, PTPRF, PTPRN, RPTOR, LOC100911881, RCC2, MIB2, BACE1, ARL8A, NEU1, MST1R, VPS26B, ORAI1, STK11IP, FGFR3, LOC294154, ABCA2, EPHB1, LLGL1, ECE1, LMTK2, ABCB9, SPNS2, SPHK2, HTT, SYT11, NR4A3, WIPI2, ATP13…	125	0.0189629	1.7221
CA1	Downregulated	GOTERM_MF_DIRECT	GO:0050839~cell adhesion molecule binding	CADM3, CASR, CADM4, H1FX, RANGAP1, CTNNB1, MMP24, PKM, EFHD2, S1PR3, NISCH, GRIN2B, ANK3, PAK4, SEMA7A, FAM129B, EGFR, DAB2IP, PTPRM, NRXN2, BAIAP2, NECTIN1, ACTN1, NECTIN2, LYPLA2, EEF2, PTPRT, MFGE8, NRXN1, SLC9A3R2, FLNA, JUP, SCYL1, MB21D2, ADAM15, ADD1, FGFR1, CDK5R1, HCFC1, CTNND1, KLC2, CX3CL1, GCN1L1, SCRIB, LAMB2, CDC42EP1, FASN, RAB11B, CC2D1A, PLEC, NLGN2, NLGN3, ITGA3, EPHA2, MICALL1,…	16	0.0379915	1.42031
CA1	Downregulated	GOTERM_MF_DIRECT	GO:0003707~steroid hormone receptor activity	ESRRA, PPARD, RARG, RXRA, NR4A1, ABHD2, NR4A3, PAQR9, RORA, PGR, NR1D1, NR2F6, RARA, NR2F1	14	0.0346068	1.46084
CA1	Downregulated	GOTERM_MF_FAT	GO:0019899~enzyme binding	DLC1, ATP1B2, ADCY5, U2AF2, RUSC2, STAT5B, ADCY6, PGAM1, VPS52, STOML2, RANGAP1, GRIN3A, CTNNB1, GLDC, PGR, DIRAS1, RUNDC1, CRY2, CUL9, BTBD2, RARA, H2AFX, PPP1R37, PLD2, ANAPC2, DAB2IP, BCR, MAGI2, PTPRF, POLG, RXRA, PTPRN, RPTOR, JUP, RCC2, MTF1, MLEC, BACE1, ZNHIT1, ABAT, MST1R, AMFR, ADAMTS4, FBXL2, CDK5R1, STK11IP, ELL, CACNB1, CACNB3, HSPA1A, BCL2L1, PEX5L, CDC37, CDC42EP1, ATN1, GYS1, BCOR…	248	1.6625e-09	8.77924
CA1	Downregulated	GOTERM_MF_FAT	GO:0044877~macromolecular complex binding	CASR, PDGFB, MMP9, STAT5B, SRP68, HIRA, CBX4, LEMD2, CSPG4, FOXO3, ADORA1, ZIC2, CTNNB1, S1PR3, SEMA7A, FRS3, BAHCC1, RARA, PPP4C, DHX30, EGFR, SATB1, TUB, IRS2, DAB2IP, MAGI2, TMEM201, ACTN4, PTPRF, POLG, RXRA, ACTN1, EEF2, MFGE8, ARID1A, IRS1, RPTOR, ASCL1, LETM1, MNT, PYGO2, ZNHIT1, AMFR, EEFSEC, EP400, ADD2, SPTB, SMARCA4, ADD1, FGFR1, PPP2R3B, FZR1, CAMTA2, ACHE, TNRC18, GNAI2, STK11, SETD1B…	184	8.08609e-06	5.09226
CA1	Downregulated	GOTERM_MF_FAT	GO:0046872~metal ion binding	ADCY3, CDIPT, LTBP1, PDLIM7, LTBP3, SYT5, PLEKHM1, ADCY5, LTBP4, FAM20C, SYT3, ADCY6, FSTL1, RORA, CIAPIN1, CDH22, PGR, ATP2B2, STAC, BRPF3, GRIN2B, CUL9, RARA, NUDT16, RARG, CIZ1, RXRA, AARS, ZNF48, UBR4, ZFP628, BSN, ZHX3, BRAP, MGAT1, ZFP827, PITPNM1, OGFOD2, LETM1, PITPNM3, MTF1, F5, ABAT, AMFR, DOC2B, ADAMTS2, UNC13A, ADAMTS4, SIVA1, CDK5R1, PPP2R3B, GNAI2, CRELD1, DAG1, LHX2, LHX6, AGRN, ZB…	374	1.16075e-05	4.93526
CA1	Downregulated	GOTERM_MF_FAT	GO:0046982~protein heterodimerization activity	HIST2H2AA3, PPARD, PDGFB, HIP1R, SYT5, ADCY5, ARNT2, SYT3, DLK2, MIGA2, ADORA1, CTNNB1, FOS, TTR, KCNK9, GRIN2B, HEY1, CLCF1, CHRNA4, H2AFX, RARA, TUBA1A, RAMP3, EGFR, TYRO3, LIMK1, RXRA, SCUBE1, FLOT1, NECTIN1, ZHX3, IL11RA1, NECTIN2, NTSR2, EXT1, UNC13A, ADD2, SPTB, ADD1, PANX2, ABTB2, TFE3, SOX2, TFEB, BCL2L2, BCL2L1, SOX6, SOX9, SOX8, OAZ1, BCL2, PAFAH1B3, TCF4, TCF3, PIK3R2, MAF, MAFG, DVL3,…	80	0.000125948	3.89981
CA1	Downregulated	GOTERM_MF_FAT	GO:0050839~cell adhesion molecule binding	CADM3, CASR, CADM4, H1FX, RANGAP1, CTNNB1, MMP24, PKM, EFHD2, S1PR3, NISCH, GRIN2B, ANK3, PAK4, SEMA7A, FAM129B, EGFR, DAB2IP, PTPRM, NRXN2, BAIAP2, NECTIN1, ACTN1, NECTIN2, LYPLA2, EEF2, PTPRT, MFGE8, NRXN1, SLC9A3R2, FLNA, JUP, SCYL1, MB21D2, ADAM15, ADD1, FGFR1, CDK5R1, HCFC1, CTNND1, KLC2, CX3CL1, GCN1L1, SCRIB, LAMB2, CDC42EP1, FASN, RAB11B, CC2D1A, PLEC, NLGN2, NLGN3, ITGA3, EPHA2, MICALL1,…	65	1.9087e-05	4.71926
CA1	Downregulated	GOTERM_MF_FAT	GO:0016301~kinase activity	FAM20C, ITPKA, PSKH1, MAP3K9, ITPK1, EGFR, TYRO3, CSNK1G2, TBRG4, PIM2, WNK2, MARK4, NME3, SCYL1, TESK1, RELN, MVK, MST1R, FGFR1, CDK5R1, FGFR3, ERBB4, STK11, PTK7, EPHA10, SOX9, EPHB3, EPHB1, CDC37, EPHB2, EPHB6, SBK1, TTBK1, ZAP70, LMTK2, SPHK2, TAOK2, TRIO, EPHA2, PLK3, ULK1, PRKAR1B, DYRK1B, PRKAR1A, GRK6, TNK2, MTOR, GRK3, ABL2, PIP4K2B, CDC42BPB, CDK18, NUAK2, PIP5K1C, CKB, AKT1, PAK6, PKM,…	111	5.95197e-05	4.22534
CA1	Downregulated	GOTERM_MF_FAT	GO:0004714~transmembrane receptor protein tyrosine kinase activity	EGFR, TYRO3, FGFR1, FGFR3, ERBB4, FLT4, PTK7, EPHA10, EPHB3, EPHB1, EPHA2, EPHB2, IGF1R, DDR1, EPHB6	15	0.00581452	2.23549
CA1	Downregulated	GOTERM_MF_FAT	GO:0008270~zinc ion binding	PDLIM7, MMP9, RORA, TRIM46, PGR, FNTB, TRIM47, BRPF3, GRIN2B, CUL9, RARA, RNF31, RNF145, RARG, CIZ1, RXRA, AARS, UBR4, TRIM41, BRAP, MIB2, PYGO2, AMFR, RNF26, ADAMTS2, ADAMTS4, SIVA1, AMZ1, ZFAND3, TRIM67, RNF165, LHX2, RNFT2, LHX6, UNKL, TRAF4, TRAF3, ESRRA, EHMT1, CRIP2, CREBBP, NR4A1, SKI, NR4A3, CSRP2, EHMT2, SHANK3, CAPN15, HDAC4, TET3, PHF2, RNF208, LASP1, RNF157, DNMT1, RERE, HDAC6, DPP3, …	125	0.00214269	2.66904
CA1	Downregulated	GOTERM_MF_FAT	GO:0046983~protein dimerization activity	HIST2H2AA3, CADM3, CADM4, PDGFB, SYT5, ADCY5, BTRC, STAT5B, SYT3, ARNT2, DLK2, ADORA1, GLDC, CTNNB1, TTR, SLC16A1, KCNK9, GRIN2B, ATG7, CHRNA4, RARA, H2AFX, OLIG1, SPR, MTUS2, EGFR, NUDT16, TYRO3, DAB2IP, ACTN4, SCUBE1, RXRA, PDXP, ZHX3, OLFML2A, ACTN1, IL11RA1, NTSR2, ASCL1, MNT, ABAT, EXT1, ADD2, UNC13A, SPTB, ADD1, FGFR1, ACHE, ERBB4, PANX2, SOX2, TFE3, TFEB, DSCAML1, BCL2L2, BCL2L1, SOX6, SOX…	151	0.000632189	3.19915
CA1	Downregulated	GOTERM_MF_FAT	GO:0005543~phospholipid binding	SYT5, HIP1R, PREX1, SYT3, STOML2, MTSS1L, AKT1, PACSIN1, NISCH, GBF1, MAP1LC3A, AGAP1, SH3PXD2B, TUB, PLD2, DAB2IP, SH3PXD2A, INPPL1, RPH3AL, MFGE8, PSD2, ZCCHC14, ARHGAP26, ARHGAP33, OSBPL10, DOC2B, GAP43, SPTB, ARHGAP35, ADAP1, MTM1, AMER2, ARHGAP44, APBA2, PLCD1, BDH1, APBA1, WDFY3, WDFY1, SYT11, SPTBN4, ARFIP2, PHF12, TECPR1, WIPI2, GAS6, MYO10, TULP4, RAB35, SPTBN2, SNX30, ARAP1	52	0.00203174	2.69213
CA1	Downregulated	GOTERM_MF_FAT	GO:0098811~transcriptional repressor activity, RNA polymerase II activating transcription factor binding	SOX10, SOX11, SOX12, CREBBP, PRRX1, NOTCH1, ATN1, WWP2, HIPK2, PYGO2, POU3F2, NFE2L1, CARM1, RERE, SMARCA4	15	0.00507115	2.29489
CA1	Downregulated	GOTERM_MF_FAT	GO:0046873~metal ion transmembrane transporter activity	KCNC1, SLC9A7, JPH3, KCNAB3, ATP1B2, SLC6A20, TRPV2, NCS1, GRIN3A, KCNJ12, KCNJ11, KCNK12, KCNJ14, ATP2B2, SLC1A2, KCNK9, GRIN2B, SLC24A3, NIPAL3, KCNQ2, KCNG4, SLC12A9, SCN2B, KCND1, CACNG4, SLC41A1, KCNH2, ORAI1, CACNB1, CACNB3, SLC32A1, SLC39A7, PKD1, RASA3, HCN4, KCNE5, SLC39A3, HCN3, SLC8A1, SLC6A11, SLC12A4, KCNB1, SLC12A5, CACNA1I, GRIN1, ASIC2, ATP1A3, SLC6A17, ATP1A2, GAS6, SLC6A9, KCNJ9…	60	0.0010305	2.98695
CA1	Downregulated	GOTERM_MF_FAT	GO:0060090~binding, bridging	HIP1R, WWC1, AFAP1L2, SHE, MEN1, SHB, ANK1, SORBS1, ANK3, GATAD2A, SH2B1, TEX261, TCHH, DVL3, VPS18, DAB2IP, BAIAP2, IRS1, RPTOR, GAS6, KSR2, MAPK8IP3, AMFR, MAPK8IP1, CRK, BCAR3	26	0.00112209	2.94997
CA1	Downregulated	GOTERM_MF_FAT	GO:0000988~transcription factor activity, protein binding	PPARD, PRRX1, HR, WWC1, HIRA, CBFA2T3, CTNNB1, PRMT2, CRY2, HEY1, WWP2, RARA, SOX10, RBFOX2, ACTN4, LDB1, ARID5B, SOX11, SOX12, ZHX3, ACTN1, TLE2, SPEN, PPARGC1B, PRKCB, JUP, ASCL1, NCOA2, ZMIZ2, HIPK2, MAP3K10, PYGO2, NFE2L1, CARM1, SMARCA4, HCFC1, PRDM16, SRF, CALCOCO1, ATN1, LHX2, PEX14, PER1, LIMD1, POU3F2, TCF4, BCOR, TCF3, ERF, NACC2, CREBBP, SKI, PHF12, MED13L, WWTR1, ATXN7L3, HDAC5, HDAC4…	65	0.00295943	2.52879
CA1	Downregulated	GOTERM_MF_FAT	GO:0008017~microtubule binding	KIFC2, LZTS1, APC2, WDR81, NUMA1, KIF7, MAP1LC3A, CCSAP, CAMSAP1, PEX14, MTCL1, KIF21B, MTUS2, MAP1A, CAMSAP3, DPYSL2, KIF3C, MARK4, DCTN1, EML2, KIF1A, EML1, RCC2, MAP1S, TPPP, KIF19, CLIP2, MAP6, KIF26A, KATNAL1, MAPRE3, PPP5C	32	0.0372377	1.42902
CA1	Downregulated	GOTERM_MF_FAT	GO:0030695~GTPase regulator activity	DLC1, RAP1GAP, ARHGAP35, RANGAP1, LLGL1, ADAP1, TBC1D16, RASAL1, RUNDC1, CDC42EP1, ARHGAP44, GPSM1, RASA3, AGAP1, AGAP2, ARHGDIA, ARHGEF10L, AGAP3, DAB2IP, BCR, TBC1D10B, SIPA1L3, ARHGAP23, ARHGAP26, RALGDS, ADPRH, TBC1D25, PREB, SH3BP4, ARHGAP33, ACAP3, SYDE1, LOC103692165, SRGAP3, EVI5L, SYNGAP1, ARAP1	37	0.00416311	2.38058
CA1	Downregulated	GOTERM_MF_FAT	GO:0005516~calmodulin binding	ADCY3, EGFR, ORAI1, SLC8A1, NOS1, MARCKSL1, WFS1, GRIN1, UBR4, MKNK2, CAMSAP3, ITPKA, ATP2B2, MYO10, MYH9L1, KCNN3, CAMSAP1, PLA2G6, MAP6, KCNQ2, ADD2, GAP43, UNC13A, ADD1, SLC9A1	25	0.0449957	1.34683
CA1	Downregulated	GOTERM_MF_FAT	GO:0017016~Ras GTPase binding	RAP1GAP, EXOC8, HPS6, RUSC2, VPS52, RANGAP1, MTSS1L, RGP1, ITPKA, PEX5L, LLGL1, TBC1D16, RUNDC1, CDC42EP1, RANBP3, TNPO2, ARHGDIA, DVL3, TBC1D10B, MICAL3, RPH3AL, BICD2, FLNA, MICALL1, ADPRH, TBC1D25, RAB11FIP4, SH3BP4, RCC2, ULK1, IPO4, LOC103692165, SRGAP3, EVI5L, CIT, MAP3K11, CDC42BPB	37	0.0384777	1.41479
CA1	Downregulated	GOTERM_MF_FAT	GO:0046332~SMAD binding	ZC3H3, MAGI2, SMAD6, CREBBP, SKI, SMAD1, PRDM16, STUB1, FLNA, CTNNB1, MEN1, ACVR1B, FOS, HIPK2, RANBP3, SMURF1	16	0.0201642	1.69542
CA1	Downregulated	GOTERM_MF_FAT	GO:0001222~transcription corepressor binding	HDAC5, NR1D1, BSN, PHF12, RORA, FAM89B	6	0.0449293	1.34747
CA1	Downregulated	GOTERM_MF_FAT	GO:0035591~signaling adaptor activity	SHB, DAB2IP, KSR2, SORBS1, MAPK8IP3, AFAP1L2, SH2B1, MAPK8IP1, IRS1, SHE, CRK, BCAR3	12	0.0167196	1.77677
CA1	Downregulated	GOTERM_MF_FAT	GO:0004842~ubiquitin-protein transferase activity	BACH2, UBE3B, BTRC, KEAP1, RNF216, RNF187, NHLRC1, STUB1, FEM1A, FBXW8, TRIM3, MGRN1, WWP2, KBTBD6, KLHL21, HECTD3, HECTD4, PELI3, BCOR, TRAF4, UNKL, TRAF3, RNF31, FBXO2, UBR4, GAN, PDZRN3, HERC2, MARCH4, BRAP, RNF43, KCTD10, UBE2O, KLHL36, KLHL18, RNF208, MIB2, AMFR, SMURF1, RNF19B, ZER1, RNF40, FBXL2	52	0.030564	1.51479
CA1	Downregulated	GOTERM_MF_FAT	GO:0015291~secondary active transmembrane transporter activity	SLC36A1, SLC9A7, SLC45A4, SLC6A20, SLC45A1, SLC7A4, SLC7A5, SLC35A2, SLC1A4, SLC32A1, SLC1A2, SLC16A1, SLC24A3, SLC4A2, SLCO3A1, SLC4A3, SLC4A5, SLC8A1, SLC12A9, SLC6A11, SLC12A4, SLC12A5, SLC6A17, ANKH, SLC6A9, SLC7A1, SLC37A1, SLC25A10, SLC41A1, SLC13A3, CLCN7, SLC25A18, SLC9A1	33	0.0425707	1.37089
CA1	Downregulated	KEGG_PATHWAY	rno04390:Hippo signaling pathway	WNT5B, APC2, BTRC, SOX2, WWC1, LOC100909849, LLGL1, SCRIB, CTNNB1, CRB2, DLG4, LIMD1, PPP2R2C, ACTB, WNT10A, FZD8, DVL3, WNT10B, FZD1, TEAD2, FZD2, SMAD1, WWTR1, YWHAG, WNT7B, CSNK1D, CSNK1E, RASSF1	28	0.00264928	2.57687
CA1	Downregulated	KEGG_PATHWAY	rno04923:Regulation of lipolysis in adipocytes	ADCY3, IRS2, GNAI2, ADCY5, ADCY6, ADORA1, IRS1, AKT1, ADCY9, GNAS, LIPE, PIK3R2, AKT2	13	0.0218949	1.65966
CA1	Downregulated	KEGG_PATHWAY	rno04724:Glutamatergic synapse	ADCY3, PLD2, DLGAP1, GNAO1, GNAI2, ADCY5, GRIK3, GRIN1, ADCY6, GRIK5, GRIN3A, SHANK1, SHANK3, PRKCB, SLC1A2, GNB2, GRIN2B, ADCY9, GRIN2C, GRIN2D, DLG4, GNAS, GRK3	23	0.00311573	2.50644
CA1	Downregulated	KEGG_PATHWAY	rno04713:Circadian entrainment	ADCY3, NOS1, GNAO1, GNAI2, ADCY5, GRIN1, ADCY6, CACNA1I, PRKCB, FOS, GNB2, KCNJ9, GRIN2B, ADCY9, GRIN2C, GRIN2D, CACNA1G, PER1, GNAS, RASD1	20	0.0044108	2.35548
CA1	Downregulated	KEGG_PATHWAY	rno04725:Cholinergic synapse	ADCY3, ACHE, GNAO1, GNAI2, ADCY5, ADCY6, KCNJ12, KCNJ14, PRKCB, AKT1, FOS, GNB2, ADCY9, FYN, BCL2, CHRNA4, KCNQ2, AKT2, PIK3R2	19	0.0281509	1.55051
CA1	Downregulated	KEGG_PATHWAY	rno04915:Estrogen signaling pathway	ADCY3, EGFR, GNAO1, GNAI2, ADCY5, MMP9, ADCY6, HSPA1A, AKT1, FOS, ADCY9, KCNJ9, ATF6B, GNAS, SHC3, AKT2, PIK3R2	17	0.0315588	1.50088
CA1	Downregulated	KEGG_PATHWAY	rno04070:Phosphatidylinositol signaling system	CDIPT, INPPL1, PIP5K1C, ITPKA, PRKCB, CDS2, MTMR3, MTM1, MTMR1, SYNJ2, PLCD1, IP6K1, ITPK1, MTMR4, INPP5A, PIK3R2, PIP4K2B	17	0.0315588	1.50088
CA1	Downregulated	KEGG_PATHWAY	rno04261:Adrenergic signaling in cardiomyocytes	ADCY3, PPP2R3B, GNAI2, PPP2R5B, ATP1B2, PPP2R5D, ADCY5, ADCY6, CACNB1, ATP1A3, CACNG4, CACNB3, ATP1A2, AKT1, ATP2B2, ADCY9, BCL2, ATF6B, ADRA1A, GNAS, PPP2R2C, AKT2, SLC9A1	23	0.0152589	1.81648
CA1	Downregulated	KEGG_PATHWAY	rno04970:Salivary secretion	ADCY3, ATP2B2, NOS1, ADCY9, ATP1B2, ADCY5, ADCY6, ATP1A3, ADRA1A, GNAS, SLC4A2, ATP1A2, SLC9A1, PRKCB	14	0.0474899	1.3234
CA3	Upregulated	GOTERM_BP_FAT	GO:0009411~response to UV	IMPACT, MME, CHEK1, AQP1, GPX1, ERCC5, PTN, PRKAA1, CAT, UBE2A, POLI, FECH, USP1, PRIMPOL, FMR1, ATR, WRN, MAP4K3, ATF4, NEDD4, EIF2S1, MDM2, RAD18, MAPK9, CUL4B, ZRANB3	26	0.048592	1.31344
CA3	Upregulated	GOTERM_BP_FAT	GO:0051984~positive regulation of chromosome segregation	CUL3, SGO2, SLF2, SFPQ, NSMCE2, RAD18, SMC6, RB1	8	0.0464651	1.33287
CA3	Upregulated	GOTERM_BP_FAT	GO:0090305~nucleic acid phosphodiester bond hydrolysis	NCBP2, APLF, PNPT1, ERI1, CNOT2, ERI2, CNOT6, NOCT, FANCM, ERCC5, PARN, CNOT6L, RNASET2, DBR1, TSEN34, RNASE4, DDX1, LAS1L, WRN, CSTF2T, LACTB2, RBBP8, DCLRE1C, DIS3, PCF11, TDP2, PNRC2, POP4, BIVM, ZRANB3, SLC25A16, CPSF3, XRN1, CPSF2, XRN2, RPP40, REV3L	37	0.0432335	1.36418
CA3	Upregulated	GOTERM_BP_FAT	GO:0050855~regulation of B cell receptor signaling pathway	PLCL2, PTPN6, PTPRC, LPXN, LYN, CD300A, CMTM3	7	0.0420385	1.37635
CA3	Upregulated	GOTERM_BP_FAT	GO:0009892~negative regulation of metabolic process	XRCC5, A2M, AIF1, MALSU1, EDN1, SYNCRIP, ZFP639, AQP1, ERLEC1, CUL3, N4BP2L2, PICALM, APOD, CTGF, ZFP90, OGT, S100A1, STAG2, TWIST1, OXR1, PIK3CG, PPP1R36, GTPBP4, C4A, ROCK1, CRYAB, C4B, ROCK2, ZHX1, WNK1, SERPING1, SYNJ2BP, EIF2AK1, MTF2, ZFP280C, CD34, RPS14, ZFP280D, EIF2S1, TFPI, TGIF1, EIF2AK2, SRSF10, TAF9B, DUSP10, HFE, NIFK, CHEK1, BDKRB2, ZFP819, DMD, MTERF3, SPOP, NKRF, ASXL2, IKZF1, P…	285	0.0395612	1.40273
CA3	Upregulated	GOTERM_BP_FAT	GO:0051050~positive regulation of transport	NCBP2, SYT1, RARRES2, ATP1B3, GRIK1, IL18, XPO4, EDN1, TLR2, TLR3, TLR4, ANKRD1, AQP1, TLR7, TGFB1, B2M, CD47, WDR75, TARDBP, VPS4B, CEP290, RAPGEF4, S100A1, RAB27A, TWIST1, SYK, KIF5B, C4B, FMR1, WNK1, SYNJ2BP, PCM1, CDKL2, CTDSPL2, HIF1A, VAMP8, SCYL2, CD34, MAPK9, NFE2L2, CLEC5A, ANKFY1, HMGB1, FGR, HFE, NFKBIA, CACNB2, SNX4, IL33, OAZ1, HNMT, DMD, GOLPH3L, FCER1G, TMEM30A, HAVCR2, TRPC1, OSBP…	129	0.0393605	1.40494
CA3	Upregulated	GOTERM_BP_FAT	GO:0071214~cellular response to abiotic stimulus	XRCC5, GCLC, IL18, IMPACT, TLR3, MME, BNIP3, CHEK1, TLR4, RPE65, BDKRB2, ANKRD1, AQP1, TLR7, TGFB1, CRADD, SWI5, CASP4, NIPBL, CASP8AP2, DDX3X, MTCH2, CASP8, PKD2, PTN, CASP1, ERRFI1, RCSD1, RPGR, POLI, MYO6, CRYAB, FMR1, GTF2H5, WRN, ATR, TANK, ATM, TRPM1, CYBA, ATF4, HIF1A, NEDD4, EIF2S1, IRF1, MDM2, MAPK9, CUL4B, MYLK, NPPA	50	0.0368933	1.43305
CA3	Upregulated	GOTERM_BP_FAT	GO:0046457~prostanoid biosynthetic process	PNPLA8, PLA2G4A, TBXAS1, PTGDS, EDN1, PTGS1, MAPK9, PIBF1, CD74	9	0.0359896	1.44382
CA3	Upregulated	GOTERM_BP_FAT	GO:0045454~cell redox homeostasis	TMX1, GCLC, AIFM1, GRXCR1, TMX3, PRDX4, DNAJC10, PRDX1, GPX1, TXNDC12, NXN, ERO1B, KRIT1, DLD, NFE2L2, SCO1	16	0.0359364	1.44447
CA3	Upregulated	GOTERM_BP_DIRECT	GO:0032543~mitochondrial translation	MRPL23, MRPS17, MRPS34, RARS2, PTCD3, CHCHD1, MTERF3, MRPL47, MRPL57, MTERF4, GATB, GATC	12	0.0344817	1.46241
CA3	Upregulated	GOTERM_BP_FAT	GO:1903311~regulation of mRNA metabolic process	NCBP2, POLR2G, APOBEC1, ZC3HAV1, SRSF10, TRA2A, PNPT1, SYNCRIP, CDC73, WTAP, RNF219, KHDRBS1, KHDRBS3, MAGOH, FMR1, YTHDC1, SNW1, RNPS1, MBNL2, RBMX, CTR9, SRSF3, PAPOLA, SON, SRSF6, PTCD2, RBM25L1	27	0.0341165	1.46703
CA3	Upregulated	GOTERM_BP_FAT	GO:0016050~vesicle organization	SNX19, SNAP29, SYT1, CAV2, MOB4, SHROOM2, VAPA, SNX5, SNX7, SNX2, EEA1, SNX4, AQP1, VPS33B, CD2AP, CHMP2B, TMF1, CUL3, STX12, PICALM, ZPBP, GOLPH3L, VPS4B, RAB20, SEC23IP, TBPL1, STX5, VAV3, KIF5B, RAB39A, SNAPIN, VPS41, VPS8, PLEKHF1, PLA2G4A, VAMP8, CD34, SYTL2, ANKFY1	39	0.0328728	1.48316
CA3	Upregulated	GOTERM_BP_FAT	GO:0098813~nuclear chromosome segregation	RAD21L1, SEPT1, SLF2, CPEB1, MLH3, LATS1, CHMP2B, NDC1, CUL3, WAPL, FANCM, RAD21, NIPBL, CEP57, CENPC, VPS4B, RAB11A, NSMCE2, TPR, STAG2, ESCO1, PDS5B, ANAPC4, SPDL1, PIBF1, RB1, CDC26, CDC27, SMC2, SMC3, ATM, MIS12, NCAPD3, SMC4, ATRX, TEX15, DUSP1, SGO2, SFPQ	39	0.0308156	1.51123
CA3	Upregulated	GOTERM_BP_FAT	GO:0035556~intracellular signal transduction	VAPA, AIF1, STAT5A, EDN1, PPP2R5C, CUL3, G2E3, CTGF, MAP3K8, PIK3C3, RAPGEF4, OGT, CAB39, RAB20, TWIST1, SYK, RAB27A, PIK3CG, PLD1, MAGI3, ROCK1, CRYAB, RAN, PIK3CB, ROCK2, WNK1, SYNJ2BP, TANK, SPAG9, NME5, MAPK9, PIDD1, ARL8B, RAB10, EIF2AK2, EPS8L2, GRB14, DUSP10, STK17B, NFKBIA, AKAP11, BDKRB2, RIMS2, ARFGEF1, MYO9A, CD74, KRAS, DMD, FBXO9, BLNK, SPOP, TYROBP, OSBPL8, IL1RL1, TGFBR1, NDFIP1, N…	277	0.0288507	1.53984
CA3	Upregulated	GOTERM_BP_FAT	GO:0072593~reactive oxygen species metabolic process	ASS1, AIF1, IL18, EDN1, TLR2, PRDX4, BNIP3, TLR4, ITGB2, TLR6, PRDX1, SESN1, TGFB1, NDUFAF2, GPX1, CTGF, PKD2, RHOA, HBP1, CAT, OGT, NDUFS3, DDAH1, RAB27A, SYK, HSP90AA1, CRYAB, NCF1, CYCS, PDK4, TGFBR2, ATP7A, CYBA, G6PD, HIF1A, RFK, CD34, MAPK9, NFE2L2, HSPD1, GSTP1	41	0.0251971	1.59865
CA3	Upregulated	GOTERM_BP_FAT	GO:0044093~positive regulation of molecular function	APOBEC1, ATP1B3, RP2, EDN1, TLR2, TLR3, RPS27L, TLR4, TLR6, CNOT6, TGFB1, CRADD, B2M, TBC1D15, NLRC4, PICALM, CASP8AP2, PGAM5, CTGF, DNAJC9, MAP3K8, RABGEF1, RAPGEF4, PDGFD, OGT, CAB39, IFRD1, S100A1, TWIST1, SYK, TOR1AIP2, PIK3CG, MAGI3, KIF5B, NCF1, RAN, NCF4, TOR1AIP1, FMR1, WNK1, PSD4, GRHL2, HNRNPU, TANK, STK3, MAP4K3, SPAG9, RALGAPA1, MAP4K5, RFC4, RFK, EIF2S1, MAPK9, OPHN1, RIPK2, PIDD1, E…	193	0.0251415	1.59961
CA3	Upregulated	GOTERM_BP_FAT	GO:0034976~response to endoplasmic reticulum stress	CREBRF, TMX1, ATG10, DERL2, DERL1, TMX3, DNAJC10, EDEM1, ERLEC1, CASP4, RNF103, TMEM33, UFM1, TARDBP, COL4A3BP, SPOP, HERPUD1, UBE4A, AIFM1, PTPN2, ERLIN2, ERLIN1, UFL1, TXNDC12, ATF4, HSP90B1, PSMC6, DNAJB9, EIF2S1, CASP12, UBXN8, NFE2L2, PPP1R15B, EIF2AK2, USP25, UBXN4, TMCO1, SERP1	38	0.0241909	1.61635
CA3	Upregulated	GOTERM_BP_FAT	GO:0032755~positive regulation of interleukin-6 production	HMGB1, CARD9, TNFSF4, TLR1, TLR2, TLR3, TLR4, IL33, TLR6, TLR7, LGALS9, CYBA, TBC1D23, PYCARD, FCER1G, RIPK2, HSPD1, TWIST1	18	0.0230428	1.63746
CA3	Upregulated	GOTERM_BP_FAT	GO:0032868~response to insulin	HMGB1, CAV2, RARRES2, GCLC, APOBEC1, TLR2, PRKDC, RHOQ, PDE3B, RPE65, TLR4, CPEB1, YBX1, EPM2AIP1, EIF4EBP1, KRAS, PRKAA1, SHC1, PAK1, CAT, OGT, ERRFI1, RASA1, SGK1, LYN, OSBPL8, PTPN2, PTPRA, PDK4, GGH, STXBP3, RPS6, STAT1, APPL1, ANKRD26, SRSF5, ZFP106, TNFSF10, HIF1A, SRSF6, GFPT1, DENND4C, CYFIP1, UCHL3, RAB10, GSTP1, GRB14, NPPA	48	0.022426	1.64925
CA3	Upregulated	GOTERM_BP_FAT	GO:0050702~interleukin-1 beta secretion	HMGB1, NLRC4, CASP4, GBP5, PYCARD, TLR4, NLRP1A, TLR6, CASP1, LGALS9, IFNAR1	11	0.0220592	1.65641
CA3	Upregulated	GOTERM_BP_FAT	GO:0006693~prostaglandin metabolic process	PNPLA8, PLA2G4A, PTGR2, TBXAS1, PTGDS, PDPN, EDN1, PTGS1, MAPK9, PIBF1, CD74	11	0.0220592	1.65641
CA3	Upregulated	GOTERM_BP_FAT	GO:0060249~anatomical structure homeostasis	XRCC5, NBN, VPS54, ADGRF5, RPE65, TLR4, PRDX1, B2M, CTGF, TPP1, CEP290, NSMCE2, DHX36, SYK, CDH23, GNL3, CTSS, RB1, BBS10, HNRNPU, PBLD1, DCLRE1C, HIF1A, CD34, ADGRV1, CFL2, CTSH, MDM1, NEK7, IQCB1, BBS4, MAPKAPK5, PRKDC, POT1, CHMP2B, RPA1, KRAS, DMD, PPP3CB, INPP5D, SLC28A2, TINF2, SMC6, WRN, ATR, ATM, ATRX, LAMP2, PLA2G4A, TEX15, POC1B, AKR1B1, CCT8, SLC25A16	54	0.0220095	1.65739
CA3	Upregulated	GOTERM_BP_FAT	GO:0070646~protein modification by small protein removal	COPS2, USP9X, COPS3, COPS4, SENP5, SENP6, USP53, EIF3F, USP16, USP34, USP33, USP32, MYSM1, STAMBP, USP40, BRCC3, USP1, OTULIN, FAM76A, TANK, TRIM21, PSMD14, SENP1, ZRANB1, UCHL3, USP25, USP45	27	0.017988	1.74502
CA3	Upregulated	GOTERM_BP_FAT	GO:0071216~cellular response to biotic stimulus	ATG10, ASS1, IL18, TLR1, TLR2, NFKBIA, CDC73, TLR4, CPEB1, ANKRD1, TLR6, TGFB1, B2M, CFH, PYCARD, OGT, FCGR3A, ENTPD1, SYK, HAVCR2, PTGER3, TNFSF4, LYN, STAT1, ZFP709, CD180, CTR9, HIF1A, CD80, FCGR2B, PLSCR4, CX3CR1, TFPI, MAPK9, RIPK2, PPP1R15B, TREM2, GBP2, GSTP1, TMCO1	40	0.0159767	1.79651
CA3	Upregulated	GOTERM_BP_FAT	GO:0031960~response to corticosteroid	CREBRF, A2M, AIF1, SLC9A3, RT1-DB1, PTGS1, EDN1, AQP4, CBX3, TLR4, AQP1, TGFB1, EIF4EBP1, CTGF, SULT1A1, RHOA, SHC1, CYP3A9, ERRFI1, SGK1, FECH, AIFM1, RAN, HNRNPU, C1QB, HIF1A, PTGDS, GSTP1, GGCX, HMGB1, ASS1, C3, RT1-BA, MDK, CPN1, RT1-BB, KRAS, HNMT, BCHE, AGL, KLF9, MAOB, UBE2L3, ANXA3, CYBA, PLA2G4A, EIF4E, S100B, DUSP1, HSPD1	50	0.0145585	1.83688
CA3	Upregulated	GOTERM_BP_FAT	GO:0000245~spliceosomal complex assembly	SRSF1, SRPK2, SRSF10, CRNKL1, YTHDC1, PRPF39, RBMX, GCFC2, SF3B1, SCAF11, SRSF6, SLU7, ZRSR2, LUC7L3	14	0.0127751	1.89364
CA3	Upregulated	GOTERM_BP_FAT	GO:0007249~I-kappaB kinase/NF-kappaB signaling	VAPA, ZC3HAV1, HACD3, TBK1, IL18, TLR2, TSPAN6, NFKBIA, TLR3, TLR4, PPM1B, TLR6, PRDX1, TLR7, TRIM5, MIER1, CASP8, RHOA, PYCARD, CASP1, CHUK, CARD9, ROCK1, ROCK2, IL1RL1, NDFIP1, NDFIP2, MALT1, STAT1, LGALS9, TANK, TRADD, TIFAB, TNFSF10, TRIM59, S100B, RIPK1, ASH1L, IRF1, RIPK2, FAF1, GSTP1	42	0.0121465	1.91555
CA3	Upregulated	GOTERM_BP_FAT	GO:0001774~microglial cell activation	TLR1, CX3CR1, TLR2, TLR3, TLR4, IL33, TLR6, CASP1, TLR7	9	0.0117052	1.93162
CA3	Upregulated	GOTERM_BP_FAT	GO:0007034~vacuolar transport	VPS29, TGOLN2, SNX5, VPS54, SNX16, SNX2, VPS53, VPS50, SNX4, CLTC, VPS33B, LMAN1, CHMP2B, ANXA8, AP1S1, PICALM, ZFYVE16, PIKFYVE, PIK3C3, VPS4B, TBC1D5, VPS35, VPS13A, AP5M1, DOPEY1, SCARB2, RAB6A, STX5, HSP90AA1, NDFIP1, NDFIP2, ALMS1, SNAPIN, VPS41, GCC2, EPS15, TMEM106B, SPAG9, LAMP2, FCGR2B, TRAPPC8, NEDD4, SCYL2, RAB10, ANKFY1	45	0.0113148	1.94635
CA3	Upregulated	GOTERM_BP_FAT	GO:0010256~endomembrane system organization	RTN4, VAPA, ATP1B3, ATL2, SHTN1, DPP10, ATL3, SYNJ1, RHOQ, CLTC, AQP1, VPS33B, TGFB1, KCNIP4, TMF1, RTN3, BAG5, BLZF1, TMEM59, COL4A3BP, TARDBP, PIK3C3, PLS1, DYNC2H1, ANO3, VPS4B, TBPL1, RAB27A, TOR1AIP2, STX5, RAMP2, ROCK1, KIF5B, ROCK2, TOR1AIP1, MPP5, GCC2, RAB11FIP2, VAMP8, TREM2, RAB10, BIN2, SPAST, CAV2, CACNB2, CDH1, LMAN1, ARFGEF1, CHMP2B, SUMO1, ANXA8, ZPBP, TMEM33, SH3GLB1, GOLPH3L, EF…	76	0.0105034	1.97867
CA3	Upregulated	GOTERM_BP_FAT	GO:0006909~phagocytosis	HMGB1, AIF1, C3, FCNA, MEGF10, TGFB1, CD47, PYCARD, FCER1G, C2, RAB20, RAB27A, SYK, C4B, RAB39A, HCK, PLD4, NCKAP1L, COLEC12, ELMO3, ANXA3, CYBA, SCFD1, EIF2AK1, FCGR2B, CD300A, ANXA11, RAP1A, FCGR2A, MERTK, TREM2, BIN2, CD302	33	0.010114	1.99508
CA3	Upregulated	GOTERM_BP_FAT	GO:0002698~negative regulation of immune effector process	A2M, TSPAN6, DUSP10, HFE, PRKDC, IL33, PPM1B, TGFB1, PPP3CB, RABGEF1, ITCH, HAVCR2, PTPN6, PTPRC, TNFSF4, LGALS3, NDFIP1, SERPING1, SLAMF8, LGALS9, RT1-A1, SERPINB9, FCGR2B, CD300A, CD59	25	0.00747549	2.12636
CA3	Upregulated	GOTERM_BP_FAT	GO:0071826~ribonucleoprotein complex subunit organization	SRSF1, FASTKD2, CRNKL1, SRSF10, NUFIP1, CNOT2, RPS27L, EIF2A, CNOT6, MTIF3, NOCT, MRPL20, RPS25, SF3B1, RPS27, SCAF11, DDX3X, CNOT6L, EIF3F, BRIX1, CDC123, MTERF3, RPL5, EIF3J, MTERF4, ZRSR2, PUM2, LUC7L3, EIF3M, RBM22, SRPK2, KIF5B, RRP7A, NIP7, EIF2S3, YTHDC1, PRPF39, ATR, RPS6, RBMX, ATM, GCFC2, SRSF6, RPS14, SLU7	45	0.00638641	2.19474
CA3	Upregulated	GOTERM_BP_FAT	GO:2001252~positive regulation of chromosome organization	NBN, MAPKAPK5, SLF2, PAXBP1, DAXX, POT1, TGFB1, CUL3, NIPBL, MIER1, EED, NSMCE2, DHX36, OGT, TPR, TINF2, GNL3, ASXL2, TADA2A, FMR1, SNW1, RB1, ATR, ATM, CTR9, RPS6KA5, ATRX, SGO2, MTF2, SFPQ, CCT8, NEK7	32	0.0057637	2.2393
CA3	Upregulated	GOTERM_BP_FAT	GO:0051128~regulation of cellular component organization	XRCC5, SYT1, MALSU1, EDN1, ZFP639, CD53, AQP1, CD2AP, B2M, CUL3, WDR75, CD47, PICALM, APOD, BHLHB9, CTGF, VPS4B, PLS1, RAPGEF4, DHX36, OGT, RAB20, TWIST1, RAB27A, SYK, CEP295, PLD1, GBP5, TADA2A, KIF5B, ROCK1, CRYAB, C4B, PDPN, ROCK2, ANAPC4, VPS41, SYNJ2BP, SGO2, MTF2, SCYL2, MAPK9, PIAS2, EIF2AK2, EPS8L2, NEK7, TAF9B, HFE, CHEK1, RIMS2, ARFGEF1, SDHAF2, HNMT, DMD, FCER1G, SKA2, SUPV3L1, PRPF40A…	285	0.00489631	2.31013
CA3	Upregulated	GOTERM_BP_FAT	GO:0051276~chromosome organization	ITGB3BP, XRCC5, APOBEC1, TGFB1, CUL3, WDR75, RAD21, MIER1, EED, VPS4B, DHX36, SAP30L, OGT, STAG2, GNL3, TWIST1, ESCO1, TADA2A, RBL2, ROCK2, DTX3L, NUDT5, ANAPC4, FMR1, SKP1, HNRNPU, NCAPD3, DCLRE1C, HHEX, SGO2, ASCC3, MTF2, SMARCA1, NEK7, HMGB1, EID1, RAD21L1, MAPKAPK5, SLF2, TAF9B, CHEK1, CHMP2B, WAPL, NIPBL, DDX3X, POLE3, SUPV3L1, HELLS, ASXL2, TAF1, SHPRH, SMCHD1, DDX1, ATAD2, SNW1, SPDL1, PIB…	139	0.00441525	2.35504
CA3	Upregulated	GOTERM_BP_FAT	GO:0010952~positive regulation of peptidase activity	HMGB1, EGLN3, NLRP1A, RPS27L, CRADD, NLRC4, PICALM, CASP4, CASP8AP2, DDX3X, MTCH2, CTGF, CASP8, RHOA, PYCARD, ELP2, AIFM1, ACER2, CYCS, STAT1, LGALS9, TANK, PSMD14, TNFSF10, SENP1, PSME1, CASP12, MAPK9, PSME4, HSPD1, PIDD1, CTSH	32	0.00390595	2.40827
CA3	Upregulated	GOTERM_BP_FAT	GO:0006915~apoptotic process	ITGB3BP, AIF1, STAT5A, EDN1, PPP2R5C, NAA15, AQP1, MEGF10, CUL3, G2E3, USP53, BHLHB9, CTGF, KIFAP3, MAP3K8, OGT, CUL1, OXR1, TWIST1, PIK3CG, ROCK1, NCF1, ROCK2, CRYAB, NME5, EIF2S1, CX3CR1, MAPK9, PIDD1, EIF2AK2, CLEC5A, TAF9B, STK17B, CHEK1, BDKRB2, CD74, KRAS, ZFP819, FCER1G, SUPV3L1, PPP2R2B, SPOP, ST6GAL1, LGALS3, ACER2, TGFBR1, SRA1, TGFBR2, ALMS1, NCKAP1L, RPS6, ATM, TAX1BP1, LGALS9, PLA2G4…	210	0.0035953	2.44427
CA3	Upregulated	GOTERM_BP_FAT	GO:0031349~positive regulation of defense response	ZC3HAV1, TBK1, STAT5A, TLR1, TSPAN6, TLR2, TLR3, TLR4, TLR6, TLR7, CD47, TRIM5, NLRC4, PUM2, LAG3, PIK3CG, PTGER3, GBP5, LYN, COLEC12, CTSS, VAMP8, RIPK2, HMGB1, IFIH1, C3, FCNA, NFKBIA, SNX4, IL33, PYCARD, FCER1G, HAVCR2, POLR3G, KLK7, TNFSF4, CARD9, IL1RL1, TLR13, OTULIN, ERBIN, POLR3C, LGALS9, CD180, CYBA, PLA2G4A, RPS6KA3, IRF7, IRF1, HSPD1, FCGR2A	51	0.00249493	2.60294
CA3	Upregulated	GOTERM_BP_FAT	GO:0051236~establishment of RNA localization	NCBP2, XPO1, PNPT1, CPEB1, NXT2, HNRNPA3, NDC1, DDX25, RANBP1, TPR, KHDRBS1, NUP88, CKAP5, SNUPN, MAGOH, FMR1, ATR, ATM, SLBP, SARNP, HHEX, FYTTD1, RBMX2, THOC7, THOC2, SETD2, LRPPRC	27	0.00237344	2.62462
CA3	Upregulated	GOTERM_BP_FAT	GO:0006302~double-strand break repair	SMARCAD1, XRCC5, NBN, PPP4R2, RAD21L1, APLF, SLF2, PRKDC, DEK, UBE2V2, CHEK1, RPA1, SFR1, SWI5, MCM8, RAD21, NSMCE1, NSMCE2, TRIP12, TWIST1, BRCC3, DTX3L, DDX1, SMC6, WRN, ESCO2, ATM, RBBP8, DCLRE1C, RECQL, PSMD14, TEX15, RIF1, PARP9, TDP2, SFPQ, SLC25A16	37	0.00131021	2.88266
CA3	Upregulated	GOTERM_BP_FAT	GO:0002366~leukocyte activation involved in immune response	GPR183, HMGB1, ITGAL, NBN, CD244, FGR, IL18, TLR3, RORC, TLR4, SNX4, IL33, FES, APBB1IP, TGFB1, PLCL2, PYCARD, RABGEF1, FCER1G, ITFG2, SYK, TYROBP, RAB27A, HAVCR2, PTPRC, TNFSF4, LGALS3, LYN, NDFIP1, STXBP3, RPS6, LGALS9, CD180, ANXA3, ATP7A, LAT2, VAMP8, CD300A, PLCG2, CX3CR1, RIPK2, HSPD1, LCP1	43	0.00114897	2.93969
CA3	Upregulated	GOTERM_BP_FAT	GO:0006952~defense response	RARRES2, A2M, APOBEC1, ZC3HAV1, TSPAN2, AIF1, TBK1, IL18, STAT5A, PTGS1, EDN1, TLR1, TLR2, TSPAN6, AQP4, TLR3, SYNCRIP, TLR4, TLR6, C1QC, TLR7, TGFB1, B2M, CD47, NLRC4, APOD, OASL2, CFH, RABGEF1, PUM2, ITCH, MX2, SYK, RAB27A, PIK3CG, PLD1, GBP5, C4A, NCF1, PDPN, C4B, CST3, IFI47, COLEC12, SERPING1, C1QA, C1QB, RT1-A1, HIF1A, EIF2AK1, VAMP8, EIF2S1, CX3CR1, RIPK2, OAS1A, NFE2L2, ASB2, EIF2AK2, CLE…	179	0.000897692	3.04687
CA3	Upregulated	GOTERM_BP_FAT	GO:0042116~macrophage activation	HAVCR2, HMGB1, AIF1, IL1RL1, TLR1, ADGRF5, TLR2, TLR3, TLR4, IL33, TLR6, TLR7, LGALS9, CX3CR1, HSPD1, CASP1, SYK, TYROBP	18	0.00063591	3.1966
CA3	Upregulated	GOTERM_BP_FAT	GO:0002250~adaptive immune response	NBN, LILRB3A, APLF, RT1-DB1, IL18, RORC, TLR4, TLR6, C1QC, TGFB1, B2M, KLHL6, ERAP1, SYK, KDM5D, RAB27A, ADGRE1, C4A, LYN, C4B, SERPING1, CTSS, C1QA, DCLRE1C, SERPINB9, C1QB, RT1-A1, LAT2, RIPK2, CTSH, HMGB1, GPR183, C3, HFE, IL33, CD74, RT1-BB, ALCAM, PPP3CB, PYCARD, FCER1G, CD4, INPP5D, HAVCR2, PTPRC, PTPN6, TNFSF4, IL1RL1, NDFIP1, MALT1, LGALS9, FCGR2B, NEDD4, IRF7, C1RL, HSPD1, FCGR2A	57	0.000463499	3.33395
CA3	Upregulated	GOTERM_BP_FAT	GO:0006886~intracellular protein transport	XPO1, SRP14, GRPEL1, IL18, XPO4, TLR2, TLR3, TLR4, TLR7, TGFB1, ERLEC1, SSR1, TBC1D15, WDR75, APOD, RABGEF1, CEP290, VPS13A, OGT, RAB27A, SYK, MYO6, KIF5B, NCF1, SRP54A, RAN, VPS41, SYNJ2BP, PCM1, CDKL2, GCC2, CTDSPL2, TRAM1L1, TRAPPC8, SLU7, MAPK9, ZFAND6, DERL2, DERL1, SNX5, MTX2, COPZ1, SNX2, NFKBIA, LMAN1, RIMS2, CD74, OAZ1, STX12, HNMT, MTERF4, SCARB2, PPP2R2B, TMEM30A, HERPUD1, TGFBR1, ERBI…	130	0.000442468	3.35412
CA3	Upregulated	GOTERM_BP_FAT	GO:0070925~organelle assembly	FASTKD2, SEPT2, SEPT1, EDN1, CNOT2, RPS27L, CNOT6, TBC1D15, NLRC4, PIK3C3, DYNC2H1, VPS4B, PLS1, PUM2, RAB20, TBPL1, CEP295, CEP83, RRP7A, PCM1, NME5, CEP162, TRAPPC8, CD34, RPS14, CC2D2A, MAPK9, BIN2, SEPT7, IQCB1, BBS4, CHMP2B, RPS25, RPS27, STX12, ZPBP, DDX3X, CNOT6L, BRIX1, MTERF3, RPL5, MTERF4, SEC23IP, ALMS1, PIBF1, RPS6, POC1B, TRIM59, TMOD1, ARL13B, KIF24, KIF27, TTC26, CFAP221, EIF2A, CC…	103	0.000304385	3.51658
CA3	Upregulated	GOTERM_BP_FAT	GO:0000278~mitotic cell cycle	ITGB3BP, SEPT2, AIF1, STAT5A, EDN1, PPP2R5C, RPS27L, CD2AP, TGFB1, CRADD, CUL3, EIF4EBP1, NLRC4, RAD21, VPS4B, TADA2A, STK24, RAN, PDPN, ANAPC4, NCAPD3, ARL8B, PIDD1, SEPT7, FGFR2, CAV2, HMGB1, BBS4, RAD21L1, SLF2, ANLN, CHEK1, ANGEL2, CCNG1, CHMP2B, WAPL, NIPBL, DDX3X, SKA2, PPP2R2B, PTPN6, PIBF1, SPDL1, CDC26, RPS6, CDC27, ATM, EIF4E, UBA3, SLC25A16, NBN, BORA, CLTC, LATS1, DAXX, RHOU, OFD1, PA…	109	0.000276253	3.55869
CA3	Upregulated	GOTERM_BP_FAT	GO:0032481~positive regulation of type I interferon production	POLR3G, HMGB1, IFIH1, ZC3HAV1, TBK1, TLR2, TLR3, TLR4, POLR3C, TLR7, IFNAR1, IRF7, PLCG2, IRF1, HSPD1, SYK	16	0.000226161	3.64558
CA3	Upregulated	GOTERM_BP_FAT	GO:0008380~RNA splicing	SRSF1, NCBP2, PRPF4B, CRNKL1, ZFP638, SYNCRIP, HNRNPLL, WTAP, YBX1, SMNDC1, RNF219, TARDBP, DBR1, ZRSR2, LUC7L3, CDK13, KHDRBS1, SRPK2, KHDRBS3, RBM41, MAGOH, FMR1, PRPF39, MBNL2, CDC5L, AQR, RBMX2, SLU7, RBM25L1, SRSF10, TRA2A, HNRNPA3, SF3B1, SCAF11, HTATSF1, MTERF3, MTERF4, TSEN34, PRPF40A, RBM22, LGALS3, DDX1, YTHDC1, RNPS1, SNW1, RBMX, GCFC2, SRSF3, SON, SRSF5, METTL14, SRSF6, SFPQ, SYF2, ZR…	58	0.000142484	3.84623
CA3	Upregulated	GOTERM_BP_FAT	GO:0006974~cellular response to DNA damage stimulus	XRCC5, PPP2R5C, TIPINL1, RPS27L, ANKRD1, CRADD, RAD21, PMS2, TWIST1, POLK, MYO6, POLI, DTX3L, USP1, NEIL2, FMR1, TANK, ESCO2, DCLRE1C, ASCC3, RAD18, BIVM, PIDD1, HMGB1, RAD21L1, SLF2, UBE2V2, CHEK1, CCNG1, CD74, NIPBL, MTCH2, SKIL, VAV3, SHPRH, PRIMPOL, DDX1, SNW1, ATR, WRN, ATM, NSMCE4A, PARP9, CDKN2AIP, SLC25A16, PARP2, ARMT1, NBN, APLF, DEK, MLH3, MTFR2, FANCM, MCM8, SWI5, AP1S1, NSMCE1, NSMCE…	105	0.000118211	3.92734
CA3	Upregulated	GOTERM_BP_FAT	GO:0002274~myeloid leukocyte activation	HMGB1, CD244, FGR, AIF1, ADGRF5, TLR1, TLR2, SPI1, TLR3, TLR4, SNX4, IL33, FES, TLR6, TLR7, TGFB1, CNR2, PYCARD, RABGEF1, FCER1G, CASP1, SYK, TYROBP, HAVCR2, ADAM10, LYN, IL1RL1, TGFBR2, STXBP3, LGALS9, ANXA3, LAT2, FCGR2B, VAMP8, CD300A, PRAM1, CX3CR1, HSPD1, FCGR2A	39	0.000104846	3.97945
CA3	Upregulated	GOTERM_BP_FAT	GO:0002495~antigen processing and presentation of peptide antigen via MHC class II	FCGR2B, RT1-DB1, PYCARD, CTSE, IFI30, FCER1G, RT1-BA, TREM2, RT1-DOB, RT1-DA, CD74, RT1-BB	12	0.000100542	3.99765
CA3	Upregulated	GOTERM_BP_FAT	GO:0006417~regulation of translation	NCBP2, PSTK, COA3, RBM3, MALSU1, IMPACT, EIF5B, SYNCRIP, CNOT2, RPS27L, EIF2A, CPEB1, CNOT6, TGFB1, EIF4EBP3, EIF4EBP1, RPS3A, DDX25, RHOA, EIF1, PUM2, TPR, USP16, RMND1, KHDRBS1, FECH, MAGOH, FMR1, RPS4X, SARNP, EIF4G2, TRAP1, EIF2AK1, EIF4A2, EIF2S1, PPP1R15B, EIF2AK2, EIF5A2, XRN1, LRPPRC, SERP1, GATC, POLR2G, MAPKAPK5, DDX3X, CNOT6L, EIF3F, PRKRA, CDC123, HNRNPD, LARS, PRKAA1, GUF1, EIF3J, EI…	63	8.63798e-05	4.06359
CA3	Upregulated	GOTERM_BP_FAT	GO:0001775~cell activation	CAST, AIF1, TBK1, IL18, STAT5A, TLR1, TLR2, TLR3, RORC, TLR4, TLR6, VPS33B, MEGF10, TLR7, CBFB, TGFB1, B2M, CD47, CTGF, RABGEF1, IL15RA, ITCH, ITFG2, RAB27A, SYK, C1GALT1C1, PDPN, PIK3CB, CST3, APOLD1, DCLRE1C, HHEX, LAT2, VAMP8, PRAM1, CX3CR1, RIPK2, TNFAIP8L2, ITGAL, HMGB1, GCLC, FGR, HFE, ITGB2, SNX4, JAML, IL33, CD74, CNR2, FCER1G, ENTPD1, HELLS, TYROBP, BLNK, HAVCR2, PTPN6, VAV3, IKZF1, LGAL…	133	4.14236e-05	4.38275
CA3	Upregulated	GOTERM_BP_FAT	GO:0045087~innate immune response	A2M, ZC3HAV1, TBK1, AIF1, IL18, RT1-DB1, STAT5A, TLR1, EDN1, TLR2, TSPAN6, SYNCRIP, AQP4, TLR3, TLR4, FES, TLR6, TLR7, C1QC, PRDX1, TGFB1, B2M, TRIM5, NLRC4, OASL2, CFH, PUM2, MX2, LAG3, RAB27A, SYK, GBP5, C4A, LYN, IRGM, SERPING1, COLEC12, IFNAR1, C1QA, SERPINB9, RT1-A1, IFNAR2, C1QB, IPO7, RIPK2, OAS1A, EIF2AK2, CLEC5A, GBP2, TNFAIP8L2, HMGB1, IFIH1, SDHAF4, ASS1, ATG12, FGR, C3, FCNA, DUSP10, …	94	2.35771e-05	4.62751
CA3	Upregulated	GOTERM_BP_FAT	GO:0070647~protein modification by small protein conjugation or removal	DZIP3, MED21, RNF213, CBFB, ZNRF2, CUL3, G2E3, CUL5, USP53, NLRC4, RNF141, KLHL9, RABGEF1, ITCH, OGT, FBXO22, CUL1, GNL3, GTPBP4, USP1, DTX3L, ANAPC4, SKP1, TANK, RIPK2, MAPK9, RAD18, PIAS2, NFE2L2, ASB2, FBXO11, IFIH1, GCLC, DERL1, FBXO40, UBA6, HFE, UBE2V2, KBTBD4, KBTBD3, EIF3F, KBTBD8, HECTD2, RNF10, FBXO9, SPOP, RNF13, HERPUD1, SHPRH, TGFBR1, NDFIP1, NDFIP2, UBE2L6, PCNP, MALT1, CDC26, UBE2L…	132	1.27538e-05	4.89436
CA3	Upregulated	GOTERM_BP_FAT	GO:0044085~cellular component biogenesis	ITGB3BP, HCCS, SYT1, A2M, FASTKD2, AIF1, MALSU1, EDN1, AQP4, AQP1, RNF213, CUL3, RSL1D1L1, PICALM, BHLHB9, APOD, CTGF, PIK3C3, DYNC2H1, VPS4B, PLS1, OGT, ZRSR2, CAB39, RAB20, LUC7L3, TBPL1, PLS3, TWIST1, CEP295, KRR1, PLD1, GTPBP4, GBP5, ROCK1, CRYAB, ROCK2, RRP7A, RAN, TAF4B, EIF2S3, VPS41, PCM1, ST13, SPAG9, NME5, CEP162, TRAPPC8, CD34, RPS14, CC2D2A, MAPK9, EIF2AK2, EPS8L2, BIN2, IQCB1, RAD21L…	344	1.16059e-05	4.93532
CA3	Upregulated	GOTERM_BP_FAT	GO:0006413~translational initiation	POLR2G, IMPACT, BDP1, EIF5B, EIF2A, MTIF3, EIF4EBP3, EIF4EBP1, DDX3X, EIF1AX, CDC123, EIF3F, EIF3L, EIF1, EIF3J, TPR, EIF3M, KHDRBS1, EIF2S3Y, FECH, PAIP2, FMR1, EIF2S3, SSB, ATF4, EIF2AK1, EIF4E, EIF2S1, EIF4A2, PPP1R15B, EIF2AK2, YAE1D1, EIF5A2	33	4.61849e-06	5.3355
CA3	Upregulated	GOTERM_BP_FAT	GO:0051246~regulation of protein metabolic process	RARRES2, A2M, AIF1, MALSU1, STAT5A, EDN1, SYNCRIP, AQP1, ERLEC1, CUL3, PICALM, CTGF, MAP3K8, CFH, OGT, CAB39, TWIST1, OXR1, SYK, PIK3CG, MAGI3, GTPBP4, C4A, TADA2A, ROCK1, CRYAB, C4B, ROCK2, WNK1, SERPING1, SYNJ2BP, TANK, SPAG9, EIF2AK1, MTF2, EIF2S1, TFPI, MAPK9, PIDD1, EIF2AK2, GATC, PPP2R3A, DUSP10, HFE, NFKBIA, CHEK1, BDKRB2, ARFGEF1, CD74, KRAS, KBTBD4, DMD, CDC123, PPP2R2B, SPOP, ASXL2, OSB…	327	3.85261e-06	5.41425
CA3	Upregulated	GOTERM_BP_FAT	GO:0034613~cellular protein localization	ATP1B3, VAPA, CD2AP, ERLEC1, SSR1, WDR75, APOD, PIK3C3, PLS1, CEP290, VPS13A, OGT, SYK, RAB27A, KIF5B, ROCK1, NCF1, RAN, SRP54A, ROCK2, VPS41, SYNJ2BP, PCM1, NME7, GCC2, ESCO2, CTDSPL2, TRAPPC8, CC2D2A, MAPK9, RAB10, MTX2, CACNB2, NFKBIA, HFE, RIMS2, CD74, STX12, HNMT, DMD, GOLPH3L, EFR3A, FCER1G, MTERF4, PPP2R2B, SLC28A2, FCHO2, DHX9, OSBPL8, TGFBR1, DDX1, PIBF1, SPDL1, ARFIP1, ATR, UBE2L3, LGAL…	214	3.3792e-06	5.47119
CA3	Upregulated	GOTERM_BP_FAT	GO:0044265~cellular macromolecule catabolic process	NCBP2, DZIP3, ZC3HAV1, PPP2R5C, CNOT2, CD2AP, CNOT6, RNF213, ERLEC1, CUL3, CUL5, VPS4B, ITCH, LSM1, FBXO22, CUL1, MAGOH, USP1, FMR1, ANAPC4, CST3, SKP1, PSMA3, OPHN1, NFE2L2, ASB2, XRN1, XRN2, LRPPRC, DERL2, GCLC, DERL1, PNPT1, UBA6, HFE, UBE2V2, IL33, KBTBD4, CNOT6L, HNRNPD, ZMPSTE24, SUPV3L1, FBXO9, SPOP, TAF1, HERPUD1, NDFIP1, UBE2L6, RNPS1, PCNP, TINAGL1, UBE2L3, CDC26, ATM, ATE1, PSMC6, DNAJ…	133	3.08277e-06	5.51106
CA3	Upregulated	GOTERM_BP_FAT	GO:0016071~mRNA metabolic process	NCBP2, SRSF1, APOBEC1, PRPF4B, ZC3HAV1, CRNKL1, CNOT2, SYNCRIP, CPEB1, HNRNPLL, WTAP, CNOT6, NOCT, YBX1, SMNDC1, PARN, RNF219, DBR1, ZRSR2, LSM1, LUC7L3, CDK13, KHDRBS1, SRPK2, KHDRBS3, RBM41, MAGOH, FMR1, PRPF39, MBNL2, CDC5L, CSTF2T, RBBP6, PCF11, AQR, RBMX2, CPSF6, SLU7, THOC7, CPSF3, XRN1, CPSF2, RBM25L1, POLR2G, SRSF10, PNPT1, TRA2A, ERI1, CDC73, HNRNPA3, SF3B1, SCAF11, CNOT6L, HTATSF1, NUDT…	88	1.49031e-06	5.82672
CA3	Upregulated	GOTERM_BP_FAT	GO:0080134~regulation of response to stress	A2M, ZC3HAV1, TBK1, STAT5A, IMPACT, EDN1, TLR1, TLR2, TSPAN6, TLR3, TLR4, ANKRD1, TLR6, VPS33B, TLR7, ERLEC1, CD47, NLRC4, APOD, CTGF, CFH, RABGEF1, PUM2, ITCH, OGT, SYK, TWIST1, OXR1, PIK3CG, MAGI3, FECH, GBP5, STK24, PDPN, USP1, FMR1, COLEC12, SERPING1, STK3, SPAG9, NME5, RT1-A1, HIF1A, EIF2AK1, VAMP8, CD34, EIF2S1, CX3CR1, RIPK2, MAPK9, NFE2L2, ASB2, EIF2AK2, MDH1, FGD2, TNFAIP8L2, HMGB1, DERL…	182	3.06599e-07	6.51343
CA3	Upregulated	GOTERM_BP_FAT	GO:0002252~immune effector process	A2M, APOBEC1, ZC3HAV1, IL18, STAT5A, TLR2, TSPAN6, TLR3, RORC, TLR4, TLR7, C1QC, TGFB1, B2M, CD47, OASL2, RABGEF1, CFH, PUM2, ITCH, ITFG2, MX2, RAB27A, SYK, C4A, NCF1, C4B, SERPING1, C1QA, RT1-A1, C1QB, LAT2, VAMP8, PRAM1, EIF2S1, CX3CR1, RIPK2, OAS1A, ASB2, EIF2AK2, MDH1, ITGAL, HMGB1, IFIH1, SCN1A, FGR, DUSP10, HFE, SNX4, IL33, CD74, TAGAP, FCER1G, TYROBP, HAVCR2, PTPN6, CARD9, LGALS3, GABRA5, …	122	1.32088e-07	6.87914
CA3	Upregulated	GOTERM_BP_FAT	GO:0010467~gene expression	XRCC5, A2M, RPL19, AIF1, MALSU1, PPP2R5C, NAA15, ASCC1, RORC, SYNCRIP, CLK1, WTAP, MED21, CUL3, WDR75, MED28, CTGF, PIK3C3, CLK4, DHX36, OGT, LUC7L3, TBPL1, STAG1, SYK, RAB27A, KRR1, TADA2A, PIK3CB, ROCK2, CRYAB, TAF4B, ZHX1, EIF2S3, SERPING1, CTDSPL2, MED19, AQR, EIF2AK1, DHX29, ASCC3, ZFP280C, EIF2S1, ZFP280D, RPS14, MAPK9, TGIF1, EIF2AK2, GATB, GATC, CHCHD1, AHCTF1, NFKBIA, HFE, WARS2, MYBL1, …	620	8.63311e-14	13.0638
CA3	Upregulated	GOTERM_CC_DIRECT	GO:0016607~nuclear speck	SRSF1, SRSF10, WTAP, MTFR2, SMNDC1, SUMO1, TARDBP, CDK13, SPOP, SRP54A, MAGOH, YTHDC1, AFF2, RNPS1, TOPORS, CDC5L, PPP1CC, SARNP, SRSF3, SRSF5, SON, HIF1A, SRSF6, FYTTD1, SLU7, PIAS2, CWC22	27	0.0444543	1.35209
CA3	Upregulated	GOTERM_CC_DIRECT	GO:0031618~nuclear pericentric heterochromatin	ATRX, IKZF1, CENPC, CBX3, NCAPD3, ESCO2	6	0.0343978	1.46347
CA3	Upregulated	GOTERM_CC_FAT	GO:0098687~chromosomal region	ITGB3BP, XRCC5, XPO1, NBN, GAR1, PPP2R5C, CBX3, CTCF, DAXX, NUDCD2, NSMCE1, ORC4, NSMCE2, TPR, ORC3, LRIF1, FMR1, DYNLT3, PPP1CC, PPP1CB, NCAPD3, ESCO2, DCLRE1C, SGO2, RIF1, THOC7, THOC2, WDR43, SEPT7, NUP43, AHCTF1, PRKDC, CDC73, CHEK1, POT1, RPA1, CENPC, PPP1R12A, PBRM1, SKA2, TINF2, HELLS, CENPN, CENPL, SMCHD1, IKZF1, SMC6, SPDL1, SSB, WRN, ATM, MIS12, ATRX, KDM4C, SLC25A16	55	0.00846029	2.07261
CA3	Upregulated	GOTERM_CC_FAT	GO:0008287~protein serine/threonine phosphatase complex	PPP4R3B, PPP4R3A, PPP4R2, PPP2R3A, PPP2R5C, PPP3R1, PPP1R11, SHOC2, PPP1CC, PPP1CB, PPP1R2, PPP1R12A, PPP3CB, CNEP1R1, PPP2R5E, PPP2R2B, PPP1R15B	17	0.00430868	2.36566
CA3	Upregulated	GOTERM_CC_FAT	GO:0005773~vacuole	TGOLN2, STARD3NL, ZC3HAV1, TLR3, VPS53, VPS50, VPS33B, TLR7, PICALM, PIK3C3, VPS4B, RABGEF1, RAB27A, PLD1, RAN, NCF4, VPS45, CST3, VPS41, TMEM106B, LAT2, NPC2, VAMP8, CD34, DLD, ARL8B, RAB10, ANKFY1, GRB14, FGD2, HMGB1, DERL2, DERL1, ASS1, CCDC93, SNX5, SNX7, SNX2, HFE, IFI30, SNX4, BDKRB2, RT1-DOB, RRAGB, CD74, RRAGC, CHMP2B, LAPTM5, STX12, BLOC1S2, GALNS, SLC30A4, DOPEY1, SCARB2, RNF13, HAVCR2,…	160	0.000860598	3.0652
CA3	Upregulated	GOTERM_CC_DIRECT	GO:0005739~mitochondrion	HCCS, LDHB, FASTKD2, MALSU1, HIBADH, PGAM5, COL4A3BP, OGT, DDAH1, OXR1, AADAT, MRPL50, GATM, SUCLG2, CRYAB, SYNJ2BP, DHX29, RARS, RPS14, DLD, MAPK9, MRPL47, GATB, MDH1, GATC, SDHAF4, MTX2, CHCHD1, SFXN4, WARS2, SDHAF2, ACAT1, MTIF3, KRAS, MTERF3, GCSH, SUPV3L1, MTERF4, MRPL57, PPP2R2B, FAHD2A, PTGR2, RARS2, CLCC1, MAOB, GARS, NDFIP2, LACTB2, PPA2, OCIAD2, DUSP26, PARP9, PTCD3, HEBP2, PTCD2, HEBP1…	204	0.000677193	3.16929
CA3	Upregulated	GOTERM_CC_DIRECT	GO:0005813~centrosome	DYNC1LI2, TTC26, CPEB1, CEP70, CCDC141, OFD1, PCGF5, ODF2L, KIFAP3, VPS4B, CEP290, RANBP1, CDH23, CEP295, RPGR, IFT80, ROCK2, PKN2, OLA1, ZFP322A, CDK6, SKP1, PCM1, CDKL2, NME7, ELL2, ANKRD26, EFHC1, FOPNL, G6PD, CEP162, FGFR1OP, RAD18, NFE2L2, DYNLRB1, WDR43, MDM1, MAP7D3, SPAST, MDH1, IFT74, SNAP29, IQCB1, BBS4, CLUAP1, KIZ, HAUS3, CEP126, CEP19, CHEK1, TUBGCP5, CEP57, BLOC1S2, NUDT21, PPP1R12A…	72	0.000503818	3.29773
CA3	Upregulated	GOTERM_CC_DIRECT	GO:0031965~nuclear membrane	XPO1, TMEM18, VAPA, MRPS14, HACD3, AHCTF1, TXLNG, AQP1, WTAP, CEP70, NDC1, SUMO1, RB1CC1, PAK1, RANBP2, PUM2, TPR, MX2, TNPO1, RASA1, GTF3C3, ZFP354C, GTPBP4, MYO6, PTGER3, OSBPL8, PTPN2, CST3, SCAI, FAM188A, FAM76B, CLIC1, PCM1, ANXA4, NAT8F3, SENP1, PTGDS, TSGA10, CNEP1R1, TMPO, CMTM3, SPAST, TMEM176B	43	4.53406e-05	4.34351
CA3	Upregulated	GOTERM_CC_DIRECT	GO:0005764~lysosome	ZC3HAV1, GM2A, NAAA, HEXB, VPS33B, TLR7, RT1-DA, TPP1, TMEM59, CALCRL, CAT, AP5M1, DPP7, CTBS, RAB27A, CTSZ, IRGM, CST3, CTSS, ARRDC3, CD164, TMEM106B, NPC2, CD34, CTSH, CTSF, EPDR1, ASS1, SNX14, SNX16, IFI30, RT1-BA, RT1-DOB, RRAGB, CD74, RRAGC, CHMP2B, LAPTM5, RNASET2, GALNS, KCNE2, HCK, GUSB, GGH, TINAGL1, FUCA1, MANBA, PLEKHF1, LAMP2, PON2, SULT1C2A	51	1.88898e-05	4.72377
CA3	Upregulated	GOTERM_CC_DIRECT	GO:0070062~extracellular exosome	LDHB, RARRES2, A2M, RARRES1, ATP1B3, SLC9A3, RP2, PTGS1, VPS50, CD53, EDIL3, AQP1, CD2AP, C1QC, B2M, CUL3, CD47, N4BP2L2, BHLHB9, APOD, KIFAP3, DYNC2H1, CFH, VPS4B, PLS1, ERAP1, DHX36, CAB39, DDAH1, RAB27A, C1GALT1C1, GATM, CRYAB, C4B, RAN, CYSRT1, OLA1, EIF2S3, SERPING1, COLEC12, KRT10, SKP1, C1QA, ST13, SPAG9, C1QB, NPC2, RPS14, RARS, CD33, EIF2S1, ARL8B, RAB10, EPS8L2, MDH1, IQCB1, NAGLU, BROX…	343	9.5787e-08	7.01869
CA3	Upregulated	GOTERM_MF_DIRECT	GO:0000166~nucleotide binding	XRCC5, LDHB, DYNC1LI2, ZFP638, RP2, SYNCRIP, CLK1, NMRK1, HIBADH, SULT1A1, OASL2, CLK4, PIK3C3, MAP3K8, DYNC2H1, VPS4B, RAPGEF4, DHX36, DDX10, ZRSR2, RAB20, RAB27A, SYK, MAGI3, GTPBP4, GBP5, KIF5B, ROCK1, ROCK2, SUCLG2, SRP54A, RRP7A, RAN, PIK3CB, WNK1, EIF2S3, IFI47, OLA1, NME7, ST13, RFC4, EIF2AK1, DHX29, SCYL2, ASCC3, RARS, PARP14, DLD, MAPK9, ARL8B, RAB10, EIF2AK2, GATB, RBM25L1, GATC, MDH1, …	53	0.0252833	1.59717
CA3	Upregulated	GOTERM_MF_DIRECT	GO:0003743~translation initiation factor activity	EIF2S3Y, BDP1, EIF5B, EIF2S3, EIF2A, MTIF3, EIF4G2, EIF4E, EIF1AX, EIF2S1, EIF4A2, EIF3F, EIF3L, EIF1, EIF3J, EIF5A2, EIF3M	17	0.0158539	1.79986
CA3	Upregulated	GOTERM_MF_FAT	GO:0004386~helicase activity	XRCC5, SMARCAD1, DHX9, NBN, SHPRH, ERCC6L2, DDX1, YTHDC2, WRN, ATRX, RECQL, MCM8, DHX29, DDX3X, ASCC3, DDX25, EIF4A2, DDX50, DHX36, SUPV3L1, DDX10, DHX40, ZRANB3, SLC25A16, DDX52, DHX57	26	0.0116849	1.93238
CA3	Upregulated	GOTERM_MF_FAT	GO:0019787~ubiquitin-like protein transferase activity	LTN1, DZIP3, UBE2G1, MED21, RLIM, RNF213, ZNRF2, CUL3, TRIM5, AP1S1, NLRC4, CUL5, G2E3, RNF141, RNF103, NSMCE1, KLHL9, RABGEF1, NSMCE2, KLHL23, RANBP2, ITCH, CUL1, UBE2A, DTX3L, HERC6, HERC4, CCNC, SKP1, TOPORS, HLTF, RBBP6, UFL1, MED7, KLHL15, MDM2, RAD18, PIAS2, ASB2, FBXO11, ATG10, XIAP, FBXO40, UBE3A, UBE2V2, KBTBD3, HECTD2, KBTBD8, RNF10, TRIP12, RNF13, RNF144B, IPP, SHPRH, UBE4A, BIRC7, UBE…	67	0.00327904	2.48425
CA3	Upregulated	GOTERM_MF_FAT	GO:0008234~cysteine-type peptidase activity	USP9X, COPS4, SENP5, SENP7, SENP6, CASP4, CASP8, EIF3F, PYCARD, USP16, USP34, CASP1, USP33, USP32, MYSM1, STAMBP, CAPN7, CTSZ, USP40, BRCC3, USP1, OTULIN, MALT1, FAM76A, CTSS, TINAGL1, TANK, SENP1, ATG4C, CASP12, ZRANB1, UCHL3, USP25, CTSH, USP45, CTSF	36	0.00296392	2.52813
CA3	Upregulated	GOTERM_MF_FAT	GO:0035091~phosphatidylinositol binding	SNX19, FGD2, SYT1, OSBP, SNX14, SNX5, SNX7, SNX16, SNX2, TTPA, EEA1, SNX4, PXK, FES, ANXA8, PICALM, DAPP1, COL4A3BP, ZFYVE16, ZFYVE9, GOLPH3L, OGT, FCHO2, TWF1, PLD1, SGK1, CCDC88A, OSBPL8, PIK3C2A, NCF1, MYO1B, NCF4, SNX25, ARFIP1, PLEKHF1, AIDA, KRIT1, SYTL2, ANKFY1, SNX13, ARAP2	41	0.00274787	2.561
CA3	Upregulated	GOTERM_MF_DIRECT	GO:0003924~GTPase activity	SEPT2, RAB3C, ATL2, ATL3, EIF5B, RHOQ, RHOU, RRAGB, RRAGC, IGTP, KRAS, DDX3X, RHOA, RAB11A, GUF1, RAB6A, GNL2, TUBA1B, MX2, ARHGDIB, RAB27A, GNL3, GTPBP4, DNM1L, GBP5, MGC105567, EIF2S3Y, RAN, SRP54A, IRGM, EIF2S3, IFI47, TRIM23, MFN1, GNGT2, GSPT1, TBCC, RAP1A, RIT2, RAB10, GBP2	41	0.00171322	2.76619
CA3	Upregulated	GOTERM_MF_FAT	GO:1901265~nucleoside phosphate binding	XRCC5, LDHB, DYNC1LI2, ZFP638, RP2, SYNCRIP, CLK1, NMRK1, HIBADH, SULT1A1, OASL2, CLK4, PIK3C3, MAP3K8, DYNC2H1, VPS4B, RAPGEF4, DHX36, DDX10, ZRSR2, RAB20, RAB27A, SYK, MAGI3, GTPBP4, GBP5, KIF5B, ROCK1, ROCK2, SUCLG2, SRP54A, RRP7A, RAN, PIK3CB, WNK1, EIF2S3, IFI47, OLA1, NME7, ST13, RFC4, EIF2AK1, DHX29, SCYL2, ASCC3, RARS, PARP14, DLD, MAPK9, ARL8B, RAB10, EIF2AK2, GATB, RBM25L1, GATC, MDH1, …	297	3.7696e-05	4.4237
CA3	Upregulated	GOTERM_MF_DIRECT	GO:0003676~nucleic acid binding	XRCC5, RPL19, ASCC1, NAA15, SYNCRIP, RORC, WDR75, TIGD2, DHX36, LSM1, LUC7L3, TBPL1, KRR1, TADA2A, ROCK2, SRP54A, TAF4B, ZHX1, EIF2S3, CCDC137, AQR, DHX29, ASCC3, EIF2S1, RPS14, TGIF1, EIF2AK2, CHCHD1, PCDH20, NIFK, MYBL1, MTIF3, PUS7, RPS25, RPS27, RSL1, SEC23IP, PRPF40A, DHX57, ASXL2, DHX9, PAIP2, PAIP1, KLF15, RPS6, UBE2L3, GCFC2, LACTB2, SRSF3, SRSF5, SRSF6, RBMXL1, H3F3C, POP4, DHX40, SRSF1,…	114	1.60047e-07	6.79575
CA3	Upregulated	GOTERM_MF_DIRECT	GO:0046872~metal ion binding	ZFP637, PTGS1, ZFP639, ZFP84, NMRK1, ZFP472, OASL2, ZFP90, NT5C2, ZRSR2, DDAH1, GGTA1, ZFP329, NUDT12, ROCK1, SUCLG2, ROCK2, CRYAB, ZHX1, OLA1, COLEC12, ZUFSP, NME7, ZFP74, PARP12, ZFP280C, ZFP280D, RFESD, NEK7, ENPP5, ERMP1, MOB4, ZFP458, RIMS2, MYO9A, ACAT1, ZFP455, ZFP780B-PS1, RPS27, ZFP819, RSL1, GALNS, ZFP958, SEC23IP, FAHD2A, DHX57, ZFP605, IKZF1, KLF9, TGFBR1, TGFBR2, ARFIP1, KLF15, ZFP60…	210	1.11996e-08	7.9508
CA3	Upregulated	GOTERM_MF_FAT	GO:1901363~heterocyclic compound binding	XRCC5, LDHB, RPL19, RP2, PTGS1, NAA15, ASCC1, RORC, SYNCRIP, CYP2D3, CLK1, NMRK1, WDR75, MAP3K8, PIK3C3, CLK4, TIGD2, VPS4B, DHX36, LSM1, LUC7L3, TBPL1, SYK, RAB27A, KRR1, MAGI3, GBP5, TADA2A, ROCK1, KIF5B, PIK3CB, SRP54A, ROCK2, TAF4B, ZHX1, EIF2S3, CCDC137, NME7, ST13, AQR, EIF2AK1, DHX29, ASCC3, SCYL2, EIF2S1, RPS14, MAPK9, TGIF1, ARL8B, EIF2AK2, GATB, GATC, DNAH12, PCDH20, CHCHD1, NIFK, WARS2…	729	1.36027e-19	18.8664
CA3	Upregulated	GOTERM_MF_FAT	GO:0003723~RNA binding	XRCC5, FASTKD2, RPL19, DZIP3, ZFP638, NAA15, ASCC1, SYNCRIP, RSL1D1L1, WDR75, OASL2, EIF1AX, DHX36, DDX10, ZRSR2, LSM1, LUC7L3, KRR1, GTPBP4, RRP7A, RAN, SRP54A, ROCK2, EIF2S3, CCDC137, PCF11, AQR, DHX29, TRMT11, PARP12, ASCC3, RPS14, EIF2S1, RARS, EIF2AK2, RBM25L1, RALYL, SRSF10, PCDH20, CHCHD1, NIFK, ANGEL2, MTIF3, PUS7, RPS25, HNRNPA3, RPS27, FRG1, HTATSF1, BRIX1, MTERF3, SUPV3L1, MTERF4, SEC2…	291	1.76978e-21	20.7521
CA3	Upregulated	KEGG_PATHWAY	rno05145:Toxoplasmosis	XIAP, IRGM, RT1-DB1, CYCS, TLR2, BIRC7, NFKBIA, TLR4, RT1-BA, STAT1, RT1-DOB, TGFB1, RT1-DA, RT1-BB, IGTP, MAPK12, IL10RB, IL10RA, CASP8, MAPK9, CHUK, IFNGR1	22	0.0369568	1.43231
CA3	Upregulated	KEGG_PATHWAY	rno03040:Spliceosome	RBM22, SRSF1, NCBP2, CCDC12, SRSF10, CRNKL1, MAGOH, TRA2A, U2SURP, SNW1, CDC5L, RBMX, HNRNPU, SMNDC1, SRSF3, HNRNPA3, SF3B1, SRSF5, AQR, SRSF6, SYF2, SLU7, THOC2, PRPF40A, RBM25L1	25	0.032511	1.48797
CA3	Upregulated	KEGG_PATHWAY	rno04611:Platelet activation	PIK3CG, TBXAS1, ROCK1, LYN, ROCK2, PIK3CB, PTGS1, MYL12A, PPP1CC, COL5A2, PPP1CB, APBB1IP, P2RY12, PLA2G4A, PLCB4, MAPK12, VAMP8, PLCG2, PPP1R12A, RHOA, FCER1G, RAP1A, PLCB2, MYLK, SYK	25	0.0310097	1.5085
CA3	Upregulated	KEGG_PATHWAY	rno05133:Pertussis	C4A, C3, C1R, TLR4, SERPING1, ITGB2, C1QC, C1QA, C1QB, MAPK12, CFL2, IRF1, PYCARD, RHOA, MAPK9, C2, CASP1	17	0.020887	1.68012
CA3	Upregulated	KEGG_PATHWAY	rno04620:Toll-like receptor signaling pathway	PIK3CG, PIK3CB, TBK1, TLR1, TLR2, TLR3, NFKBIA, TLR4, TLR6, STAT1, TLR7, IFNAR1, IFNAR2, CD80, MAPK12, RIPK1, IRF7, CASP8, MAP3K8, MAPK9, CHUK	21	0.0166566	1.77841
CA3	Upregulated	KEGG_PATHWAY	rno05164:Influenza A	XPO1, IFIH1, TBK1, RT1-DB1, IL18, NFKBIA, TLR3, TLR4, IL33, RT1-BA, RT1-DOB, TLR7, RT1-DA, NXT2, RT1-BB, PYCARD, CASP1, MX2, IFNGR1, PIK3CG, PIK3CB, CYCS, STAT1, IFNAR1, IRF9, IFNAR2, TNFSF10, EIF2AK1, MAPK12, EIF2S1, IRF7, MAPK9, OAS1A, EIF2AK2	34	0.00224166	2.64943
CA3	Upregulated	KEGG_PATHWAY	rno05140:Leishmaniasis	PTPN6, C3, NCF1, NCF4, RT1-DB1, TLR2, NFKBIA, ITGB2, TLR4, RT1-BA, STAT1, RT1-DOB, RT1-DA, TGFB1, RT1-BB, CYBA, MAPK12, FCGR2A, FCGR3A, IFNGR1	20	0.00142998	2.84467
CA3	Upregulated	KEGG_PATHWAY	rno05150:Staphylococcus aureus infection	ITGAL, C4A, C3, RT1-DB1, C1R, ITGB2, RT1-BA, RT1-DOB, C1QC, RT1-DA, RT1-BB, C1QA, C1QB, FCGR2B, CFH, C2, FCGR2A, FCGR3A, SELPLG	19	0.000121745	3.91455
CA3	Downregulated	GOTERM_BP_FAT	GO:0050805~negative regulation of synaptic transmission	KCNB1, PNKD, SNCA, PICK1, NLGN3, SHANK2, SRF, ADORA1, SHANK3, GRM4, ARF1, MAPT, CELF4, HTR6, PLA2G6	15	0.0475085	1.32323
CA3	Downregulated	GOTERM_BP_FAT	GO:0015804~neutral amino acid transport	SLC32A1, SLC38A5, SLC1A4, SLC38A3, SLC6A7, SLC6A6, SLC38A1, SLC6A17, SLC7A5, SLC43A2	10	0.0451737	1.34511
CA3	Downregulated	GOTERM_BP_FAT	GO:0051090~regulation of sequence-specific DNA binding transcription factor activity	HR, PINK1, CTNNB1, FOXS1, AKT1, PRMT2, TRIM8, CYS1, DAB2IP, DDRGK1, PPARGC1B, JUP, CTNNBIP1, SMO, TRAPPC9, PIAS4, ARRB1, HIPK2, TRIM32, RGCC, MAP3K10, RELN, CARM1, MAP3K13, SMARCA4, CRTC3, SIVA1, CRTC2, RAB7B, CRTC1, GLIS2, UBE2V1, HSPA1A, KEAP1, EGLN1, SRF, CAMK2A, TRAF3, SMAD7, CREBBP, FZD1, FZD2, GAS6, HDAC5, HDAC4, PPRC1, PTCH1, IKBKB, LRP5	49	0.0448666	1.34808
CA3	Downregulated	GOTERM_BP_FAT	GO:0001667~ameboidal-type cell migration	MEGF8, FGFR1, PPARD, PDGFB, BCAR1, PTPN23, AMOTL1, SOX9, SRF, SRC, AKT1, BAG4, PFN1, ACVR1B, ROBO1, SEMA7A, PLEKHG5, SCARB1, CLASP1, CAP1, ADAM9, DAB2IP, EGR3, TMEM201, ARHGEF7, PKN1, EVL, VASH1, PPM1F, CORO1C, HDAC5, SEMA6A, SMO, SEMA6B, NOTCH1, TNS1, SEMA6C, PLCG1, LAMA5, MYH9L1, DLL4, JUN, RGCC, SH3BGRL3, SEMA4D, ADGRA2, WNT7A, LRP5	48	0.0401465	1.39635
CA3	Downregulated	GOTERM_BP_FAT	GO:0006644~phospholipid metabolic process	SLC27A1, CDIPT, PPARD, PDGFB, HMGCR, SNCA, STOML2, PIP5K1C, PLPPR2, PLPPR3, SRC, PLPP2, CDS2, MTMR3, PLCB3, INPP5J, INPP5E, PTDSS1, AGPAT4, IP6K1, AGPAT1, EFR3B, PTDSS2, DAB2IP, PLA2G15, INPPL1, FDPS, PIGT, PI4KB, AMBRA1, PIGQ, IRS1, RUBCN, LPCAT4, PIGO, PLCG1, EPHA8, CD81, SMPD1, PLA2G6, DPM3, INPP4A, SMPD3, PC, PIP4K2B	45	0.0392566	1.40609
CA3	Downregulated	GOTERM_BP_DIRECT	GO:0007010~cytoskeleton organization	PLXNA3, MAEA, PDGFB, TUBB2B, TUBB2A, CROCC, SNCA, TGFB3, TTL, CTNNB1, PACSIN1, HTR1A, CUL7, CUL9, BCR, STMN3, BAIAP2, VANGL2, PICK1, BSN, SIPA1L3, BICD2, DCTN1, PPARGC1B, MARK2, FRY, ARPC1A, NDEL1, NAV1, ARRB1, RGCC, TRIM32, FLII, CLIP2, MAP7D1, MYO18A, DBN1, ADD2, SPTB, ADD1, CHMP2A, PALM, CDK5R1, AGFG1, SSH1, ELN, KATNB1, PTK7, SOX9, CAPZB, SRF, SRC, PXN, LLGL1, PFN1, TPGS1, FBXW5, CRMP1, RAC3,…	26	0.0386937	1.41236
CA3	Downregulated	GOTERM_BP_FAT	GO:0035303~regulation of dephosphorylation	NUAK1, ELL, PINK1, ADORA1, BAG4, CD2BP2, DLG3, GBA, SPPL3, PPP1R37, MAGI2, HTT, SMG5, RIMBP2, CAMSAP3, SFI1, SLC7A14, PPARGC1B, MPRIP, ELFN1, PPP1R9B, ELFN2, PPIA, SMPD1, SEMA4D, IKBKB, CALM2	27	0.0385867	1.41356
CA3	Downregulated	GOTERM_BP_FAT	GO:0009895~negative regulation of catabolic process	CRTC3, UBXN1, DAB2IP, ANKS1A, PHB, SMAD4, EGLN1, BANP, RGP1, ACTN3, CBFA2T3, ADORA1, FURIN, AZIN2, DBI, OS9, AKT1, HDAC4, CLEC16A, USP19, BAG6, GRIN2C, FYN, AGAP2, CCAR2, MT3	26	0.0359155	1.44472
CA3	Downregulated	GOTERM_BP_FAT	GO:0060562~epithelial tube morphogenesis	CASR, LMO4, BTRC, GJA1, LGR5, GLI3, CTNNB1, MAGED1, SPRY2, HEY1, OSR1, ROBO1, WNK4, DLG5, SOX11, VANGL2, MED12, ARID1A, CTNNBIP1, DDR1, SMO, HES5, DLL4, DEAF1, MEGF8, SOX2, PTK7, SOX9, SRF, DCHS1, PXN, SRC, RGMA, PFN1, LHX2, GATAD2A, PKD1, DVL3, SMAD4, FZD1, SKI, FZD2, NTN1, SHANK3, DVL1, HDAC5, NOTCH1, LAMA5, BAX, PTCH1, LRP5	51	0.0357779	1.44639
CA3	Downregulated	GOTERM_BP_FAT	GO:0007423~sensory organ development	PDGFB, TGFB3, JAG2, SOBP, GJA1, GLI3, LGR5, CTNNB1, SPRY2, ATP2B2, SLC25A25, HEY1, OSR1, SMARCD3, CYS1, IMPDH1, DSCAM, TUB, BCR, SOX11, RXRA, SDK2, VANGL2, NECTIN1, SIPA1L3, ARID1A, SLC9A3R1, SLC9A3R2, RAB11FIP4, ASCL1, DDR1, LHFPL5, LRP10, HES5, GNB1, LAMC3, OTOF, DLL4, JUN, FOXG1, HIPK2, ROR2, PYGO2, ZFP513, SMARCA4, FGFR1, FZR1, CLCN2, SOX2, PTK7, LRIG1, SOX9, SRF, DCHS1, EPHB2, LAMB2, LHX2, C…	77	0.035303	1.45219
CA3	Downregulated	GOTERM_BP_FAT	GO:0060074~synapse maturation	PALM, DAB2IP, CAMK2B, RELN, ADGRL1, SEZ6L, SHANK1, SEZ6	8	0.0334863	1.47513
CA3	Downregulated	GOTERM_BP_FAT	GO:0060291~long-term synaptic potentiation	EGR1, STX4, SLC8A2, NOS1, CRTC1, SNCA, NLGN3, SHANK2, DBI, SHANK3, HTR6, RELN, CAMK2B, NRGN, UNC13A	15	0.0331579	1.47941
CA3	Downregulated	GOTERM_BP_FAT	GO:0061178~regulation of insulin secretion involved in cellular response to glucose stimulus	TRPM4, STX4, HMGCR, ADCY5, BRSK2, GPR68, SIDT2, NR1D1, ARRB1, GPR27, UCP2, PLA2G6, CACNA1E, CDK16, LRP5	15	0.0331579	1.47941
CA3	Downregulated	GOTERM_BP_FAT	GO:0045834~positive regulation of lipid metabolic process	LDLR, PDGFB, STOML2, DISP3, SRC, AKT1, SORBS1, NR1D1, SCARB1, CREBL2, IRS2, EEF1A2, FDPS, NR4A3, AMBRA1, DBI, IRS1, POR, EPHA8, CD81, PLA2G6, MTOR, GHSR, SMPD3, PC	25	0.0303818	1.51739
CA3	Downregulated	GOTERM_BP_FAT	GO:0048008~platelet-derived growth factor receptor signaling pathway	BCR, PDGFB, INPPL1, BCAR1, SNCA, SLC9A3R1, SRC, LRP1, NDRG4, CSRNP1, PTPN1, ABL2, RAPGEF1	13	0.0266409	1.57445
CA3	Downregulated	GOTERM_BP_FAT	GO:0035295~tube development	CASR, LMO4, BTRC, TGFB3, VPS52, GJA1, GLI3, LGR5, CTNNB1, MAGED1, SPRY2, BAG6, OSR1, HEY1, ROBO1, AQP11, WNK4, DLG5, DAB2IP, CCKBR, RXRA, SOX11, VANGL2, MED12, ARID1A, INHBB, CTNNBIP1, ASCL1, ADRM1, SMO, DDR1, HES5, DLL4, RELN, DBN1, ADAMTS2, DEAF1, MEGF8, FGFR1, RAB3A, CLCN2, SOX2, CRLF1, PTK7, SOX9, EPHB3, CIC, SRF, DCHS1, SRC, PXN, PFN1, RGMA, NUMA1, STK40, DHCR7, LHX2, GATAD2A, POU3F3, PKD1, …	89	0.0266222	1.57476
CA3	Downregulated	GOTERM_BP_FAT	GO:0035295~tube development	CASR, LMO4, BTRC, TGFB3, VPS52, GJA1, GLI3, LGR5, CTNNB1, MAGED1, SPRY2, BAG6, OSR1, HEY1, ROBO1, AQP11, WNK4, DLG5, DAB2IP, CCKBR, RXRA, SOX11, VANGL2, MED12, ARID1A, INHBB, CTNNBIP1, ASCL1, ADRM1, SMO, DDR1, HES5, DLL4, RELN, DBN1, ADAMTS2, DEAF1, MEGF8, FGFR1, RAB3A, CLCN2, SOX2, CRLF1, PTK7, SOX9, EPHB3, CIC, SRF, DCHS1, SRC, PXN, PFN1, RGMA, NUMA1, STK40, DHCR7, LHX2, GATAD2A, POU3F3, PKD1, …	89	0.0266222	1.57476
CA3	Downregulated	GOTERM_BP_FAT	GO:0060828~regulation of canonical Wnt signaling pathway	APC2, BTRC, SOX2, CTNND2, SOX9, GLI3, LGR5, SRC, AMER3, AES, AMER2, TMEM198, RAPGEF1, CCAR2, EGR1, TRPM4, DAB2IP, ZFP703, FZD1, TLE2, DAPK3, DVL1, DKK3, NOTCH1, CSNK1D, CSNK1E, ROR2, COL1A1, WNT7A, LRP5	30	0.0240464	1.61895
CA3	Downregulated	GOTERM_BP_FAT	GO:1902475~L-alpha-amino acid transmembrane transport	SLC38A3, SLC7A2, SLC7A1, SLC38A1, SLC7A4, SLC15A4, SLC7A5, SLC7A14, SLC43A2	9	0.0180865	1.74265
CA3	Downregulated	GOTERM_BP_FAT	GO:0016322~neuron remodeling	ANKS1A, PDGFB, EPHA8, BCL11A, C1QL1, CSPG4, ABL2	7	0.0179254	1.74653
CA3	Downregulated	GOTERM_BP_FAT	GO:0032984~macromolecular complex disassembly	APC2, HBS1L, KATNB1, NCKAP5L, CAPZB, HTR1A, SMARCD3, CLASP1, NSF, TFIP11, UPF1, STMN3, MAP1A, MICAL3, ARID1A, PPP1R9B, MYH9L1, SMARCC2, SPTBN2, CLIP2, KIF19, PELO, WDR1, SH3BGRL3, ADD2, SPTAN1, SMARCA4, ADD1	28	0.0175284	1.75626
CA3	Downregulated	GOTERM_BP_FAT	GO:0051051~negative regulation of transport	SRCIN1, HMGCR, PNKD, FST, SNCA, STOML1, RANGAP1, ADORA1, KCNJ11, OS9, AKT1, BAG4, PACSIN1, BOK, TRIM9, MAPT, WNK4, DLG4, SCAMP5, DAB2IP, IRS2, BCR, PFKL, SLC25A5, MADD, SLC9A3R1, CDK5, STX1B, IRS1, RPTOR, RUBCN, INHBB, RAB11FIP5, RGCC, HTR6, ABAT, GNB5, MAPK7, KCNH2, MIDN, TNFRSF21, APC2, NFKBIB, HSPA1A, KEAP1, CX3CL1, PKD1, AGRN, FBXW11, NOS1, ABR, GNAO1, OPRL1, KCNB1, SYT11, TMBIM6, RHBDF1, FZD…	69	0.0173423	1.76089
CA3	Downregulated	GOTERM_BP_FAT	GO:0019318~hexose metabolic process	CRTC2, MIDN, STK11, MRFAP1, HK1, KCNJ11, SRC, G6PC3, AKT1, PKM, GALK1, NISCH, SORBS1, NR1D1, ENO2, GALE, HECTD4, CHST15, PDK2, IRS2, SCAMP3, WDTC1, SOGA1, INPPL1, ACTN3, PFKM, USF1, IRS1, MAN2A2, MAN2C1, MTOR, FABP5, CACNA1A, PC, LRP5	35	0.0171598	1.76549
CA3	Downregulated	GOTERM_BP_FAT	GO:0021510~spinal cord development	MDGA1, LMO4, SOX11, MED12, PTPRS, GLI3, SLIT3, AKT1, IGHMBP2, SMO, ASCL1, NOTCH1, ROBO1, DLL4, PLXDC1, ACAN, PKD1, PTCH1, RELN, MTOR, KCNH2, NEFM, CACNA1A, ERCC2	24	0.0158741	1.79931
CA3	Downregulated	GOTERM_BP_FAT	GO:0051017~actin filament bundle assembly	ELN, PPFIA1, TGFB3, SRF, SRC, PFN1, BAG4, SORBS1, CLASP1, SYNPO, LIMK1, BAIAP2, DPYSL3, EVL, SHANK1, GAS7, SHANK3, PPM1F, ARRB1, RGCC, MTOR, KCTD13, ABL2, DBN1, ADD2, ADD1	26	0.0154846	1.8101
CA3	Downregulated	GOTERM_BP_FAT	GO:0007264~small GTPase mediated signal transduction	PREX1, RASGEF1B, ITSN1, FLCN, SPRY2, DIRAS1, NISCH, ARL10, ROBO1, RAB6B, SHC3, RAPGEF1, AGAP2, AGAP3, DHCR24, ARL2, DAB2IP, BCR, STMN3, ARHGEF7, MADD, ARHGEF18, VANGL2, ARHGEF17, PSD2, BRAP, SH2D3C, ARHGAP33, ARRB1, SGSM3, JUN, COL1A2, RAB15, RELN, GPR17, ARL4D, KSR1, FKBP11, RASD2, RAB3A, RAB7B, RAB40C, CYTH3, SRC, RAC3, PLEKHG5, RAB11B, BRK1, IQSEC1, RAB2B, ABR, MAP2K1, TRIM28, TRIO, ICMT, ADGR…	71	0.0116057	1.93533
CA3	Downregulated	GOTERM_BP_FAT	GO:0008038~neuron recognition	FEZF2, MEGF8, CDK5R1, DYNLL2, ROBO1, FOXG1, DSCAML1, EPHB3, GAP43, DSCAM, EPHB2	11	0.0112008	1.95075
CA3	Downregulated	GOTERM_BP_FAT	GO:0016569~covalent chromatin modification	ZFP335, SNCA, HR, PINK1, MED24, SART3, WDR82, FLCN, BAG6, PRMT2, BRPF3, BRD4, PHC1, KDM5C, SS18L1, MT3, SATB1, HIST1H1C, TADA2B, HDAC10, CDK9, PKN1, MBD3, DAPK3, PPM1F, NCOA2, ARRB1, FBLL1, PYGO2, ZNHIT1, USP22, CARM1, KDM6B, EP400, MAP3K12, SMARCA4, SUPT6H, MEAF6, CRTC2, SETD1B, HCFC1, TRRAP, CHD5, BAZ2A, ING1, DNMT3A, EHMT1, NACC2, NOS1, PHB, CREBBP, TRIM28, SMAD4, ATXN7L3, FBL, DOT1L, HDAC5, H…	68	0.0109464	1.96073
CA3	Downregulated	GOTERM_BP_FAT	GO:0048878~chemical homeostasis	SLC22A17, CASR, SLC9A7, CHERP, ALOXE3, HMGCR, ADCY5, ATP6AP1, SNCA, ADCY6, GRIK5, STOML2, SIDT2, SLC26A11, ADORA1, DMPK, ATP2B2, ANK1, AQP11, SLC25A23, WNK4, GNG3, SLC8B1, SLC4A3, TMEM203, IRS2, SCN2B, POLG, STIM1, PTPRN, BTBD9, ISCU, ARRB1, RYR1, SMARCA4, CRTC2, STK11, SRF, SFXN5, SRC, SLC11A2, GPR27, SCARB1, HECTD4, MAFG, SPPL3, ASPSCR1, HTT, KCNB1, CACNA1I, SMAD4, ABCB6, ATP13A2, USF1, USF2, G…	134	0.0106515	1.97259
CA3	Downregulated	GOTERM_BP_FAT	GO:0003279~cardiac septum development	DVL3, NDST1, SMAD7, LMO4, SNX17, MAML1, SOX11, VANGL2, SMAD4, PTK7, FZD1, EGLN1, FZD2, TAB1, NPRL3, SMO, NOTCH1, LRP1, KIF7, HEY1, ROBO1, ZFPM1, SMARCA4	23	0.00999071	2.0004
CA3	Downregulated	GOTERM_BP_FAT	GO:0022610~biological adhesion	CADM3, MAEA, SRCIN1, TSPAN5, JAG2, PTPN23, STOML2, RANGAP1, FLCN, CTNNB1, CDH22, ROBO1, RAPGEF1, DSCAM, ADAM9, SATB1, DAB2IP, PTPRF, PLXNB1, BAIAP2, PTPRS, EEF2, PTPRT, ACTN3, SOCS5, MARK2, JUP, ADRM1, RCC2, SCYL1, HES5, UBFD1, DLL4, LSAMP, RGCC, ABAT, ZNHIT1, RELN, MAPK7, COL1A1, ERC1, DBN1, SH3GL1, ADD1, CDK5R1, PPME1, STK11, SOX2, DSCAML1, CX3CL1, EPHB3, SOX9, SRF, SRC, PXN, PFN1, EPHB6, LAMB2…	173	0.00954654	2.02015
CA3	Downregulated	GOTERM_BP_FAT	GO:1902667~regulation of axon guidance	MEGF8, PLXNA3, PLXNA4, PLXNA1, TBR1, FEZF2, SEMA6A, SEMA6B, SEMA6C, SEMA7A, SEMA4D, AGRN, DSCAM	13	0.00652683	2.1853
CA3	Downregulated	GOTERM_BP_FAT	GO:0032271~regulation of protein polymerization	HIP1R, PREX1, FKBP4, ELN, SNCA, CAPZB, BAG4, PFN1, CTTN, INPP5J, MAPT, WIPF2, BRK1, ARL2, BAIAP2, PICK1, ARFIP2, EVL, MYADM, DCTN1, ARPC1A, EML2, NCK2, ARF1, MYH9L1, TPPP, TBCD, SPTBN2, MTOR, DBN1, ADD2, ADD1, SPTAN1	33	0.0058014	2.23647
CA3	Downregulated	GOTERM_BP_FAT	GO:0042472~inner ear morphogenesis	FGFR1, DVL3, BCR, ABR, SOX2, VANGL2, PTK7, SOBP, LRIG1, NR4A3, FZD2, SOX9, SLC9A3R1, NTN1, DVL1, EPHB2, SPRY2, ATP2B2, LHFPL5, FOXG1, POU3F4, ATP8A2, ROR2	23	0.00578187	2.23793
CA3	Downregulated	GOTERM_BP_FAT	GO:0007163~establishment or maintenance of cell polarity	STK11, PTK7, BRSK2, CYTH3, AMOTL1, FBF1, LLGL1, SPRY2, NUMA1, HEY1, ATN1, LHX2, CYP26B1, DLG4, PKD1, DLG3, CLASP1, MTCL1, CAP1, DLG5, HTT, FLOT2, VANGL2, SIPA1L3, SLC9A3R1, MARK2, NDEL1, HES5, MYH9L1, WDR1, WNT7A, MYO18A	32	0.0057474	2.24053
CA3	Downregulated	GOTERM_BP_FAT	GO:0010506~regulation of autophagy	STK11, U2AF2, SNCA, PINK1, ZBTB17, FLCN, NPRL3, AKT1, MTMR3, CTTN, TRIM8, SQSTM1, MAPT, USP36, MTCL1, SUPT5H, QSOX1, MT3, GBA, GOLGA2, SOGA1, ZDHHC8, AMBRA1, ATP13A2, RUBCN, DEPDC5, VDAC1, SREBF2, CLEC16A, SH3BP4, ULK1, GSK3A, MTOR, ABL2, FBXL2, PIP4K2B	36	0.00561543	2.25062
CA3	Downregulated	GOTERM_BP_FAT	GO:0008593~regulation of Notch signaling pathway	ERH, PEAR1, DTX1, CHAC1, TSPAN5, SOX2, JAG2, TSPAN14, DLK2, RFNG, LLGL1, ASCL1, SLC35C1, NOTCH1, HES5, HEY1, TSPAN33, DLL4	18	0.00534012	2.27245
CA3	Downregulated	GOTERM_BP_FAT	GO:0021695~cerebellar cortex development	TRNP1, MAP2K1, NF1X, SEZ6L, UQCRQ, CDK5, SMO, ATXN2, ATP2B2, ULK1, SPTBN2, WNT7A, SEZ6, RERE, CACNA1A, FAIM2	16	0.00524411	2.28033
CA3	Downregulated	GOTERM_BP_FAT	GO:2000179~positive regulation of neural precursor cell proliferation	ZFP335, SETD1B, SOX2, DISP3, CX3CL1, ADGRG1, GLI3, GPR37L1, CTNNB1, HDAC5, ASCL1, SMO, NOTCH1, SMARCD3, DLL4, FOXG1	16	0.00524411	2.28033
CA3	Downregulated	GOTERM_BP_FAT	GO:1903311~regulation of mRNA metabolic process	ZFP64, U2AF2, RBM15B, HSPA1A, DAZAP1, PRPF19, BAG4, TNRC6C, SRRM4, PCBP4, SAFB, SUPT5H, RBFOX2, GTPBP1, UPF1, TMBIM6, RBFOX3, CDK9, SRPK1, SRSF4, BTG2, JMJD6, DYRK1A, CELF4, CELF3, CDK11B, RNF40, SUPT6H	28	0.00393898	2.40462
CA3	Downregulated	GOTERM_BP_FAT	GO:0008219~cell death	GDF1, SNCB, SNCA, ITSN1, ADORA1, CTNNB1, MAGED1, DCPS, MAP3K9, PELI3, CCAR2, DAB2IP, PTPRF, MAGI1, RXRA, TMEM132A, VEGFB, PIAS4, JUN, RGCC, MAPK7, MYO18A, HIGD2A, SIVA1, CDK5R1, HSPA1A, BCL2L2, NAA38, SLC11A2, ATN1, AGRN, ZFP346, DNMT3A, BMP1, PHB, SMAD4, SMAD1, ZFP746, GAS6, VDAC1, HYOU1, NOTCH1, NUP62, RNF4, PRODH1, SLC9A1, ADAR, PPARD, HIP1R, ZMAT3, TMEM161A, GJA1, GLI3, PKM, ATAD3A, AES, BAG6…	220	0.0033899	2.46981
CA3	Downregulated	GOTERM_BP_FAT	GO:0006779~porphyrin-containing compound biosynthetic process	SLC11A2, ANK1, COX10, UROS, SLC25A38, SLC25A39, TMEM14C, ABCB6, SPTB, COX15	10	0.00299276	2.52393
CA3	Downregulated	GOTERM_BP_FAT	GO:0007034~vacuolar transport	GNPTG, CHMP2A, FGFR1, RAB7B, AP1M1, SNX17, CHMP7, VPS52, PTPN23, RGP1, PCDHGA3, SRC, RNF126, TBC1D17, MGRN1, FAM109A, NDRG4, ANKRD50, TRAK1, NSG1, LMTK2, RAB11B, AP3D1, RAB6B, EHD1, STX6, FAM160A2, TBC1D10B, MAP2K1, HTT, TBC1D10A, TMED9, DCTN1, MICALL1, UBE2O, CHMP1A, ARF1, SGSM3, RAB35, HGS, SMURF1, ERC1, YKT6, CHMP4BL1	44	0.00292184	2.53434
CA3	Downregulated	GOTERM_BP_FAT	GO:0007270~neuron-neuron synaptic transmission	CLSTN3, SNCA, GRIK5, PINK1, ADORA1, RAC3, GRIN2D, SHC3, CCKBR, DLGAP2, NLGN2, NLGN3, ARID1B, SHANK2, CDK5, SHANK3, VDAC1, GRM4, PLA2G6, ADRA1A, ROR2, CHRNB2, RELN, NAT8L, RASD2, CACNA1A, UNC13A	27	0.00262145	2.58146
CA3	Downregulated	GOTERM_BP_FAT	GO:0045216~cell-cell junction organization	CLDN19, ALOXE3, TGFB3, PTPN23, GJA1, FLCN, SRF, PXN, SRC, FBF1, CTNNB1, CTTN, SORBS1, CNTNAP1, CLASP1, DLG5, ARL2, TAOK2, SMAD7, ARHGEF7, ZFP703, NFASC, NECTIN1, CAMSAP3, ACTN3, MYADM, DAPK3, NUMBL, PPM1F, CORO1C, JUP, RCC2, TBCD, WDR1, IKBKB	35	0.00202643	2.69327
CA3	Downregulated	GOTERM_BP_FAT	GO:0031109~microtubule polymerization or depolymerization	ARL2, STMN3, APC2, FKBP4, MAP1A, SNCA, KATNB1, CAPZB, NCKAP5L, DCTN1, EML2, HTR1A, NDEL1, CSNK1D, INPP5J, TPPP, MAPT, TBCD, CLIP2, CLASP1, KIF19, GOLGA2	22	0.0016888	2.77242
CA3	Downregulated	GOTERM_BP_FAT	GO:0043393~regulation of protein binding	WFIKKN1, PDGFB, STUB1, SRC, APLP2, RGMA, EPHB6, AES, HSF1, CRMP1, SMARCD3, PKD1, AGRN, GOLGA2, TFIP11, SPPL3, DAB2IP, PTPRF, ARHGEF7, TMBIM6, RFNG, CDK5, DVL1, CTNNBIP1, HDAC5, HDAC4, CSNK1E, ARRB1, BAX, HIPK2, ZFPM1, CARM1, ABL2, ADD2, ADD1, ADAM15	36	0.0012777	2.89357
CA3	Downregulated	GOTERM_BP_FAT	GO:1905039~carboxylic acid transmembrane transport	SLC38A5, SLC38A3, IRS2, SLC12A9, SLC38A10, SLC6A17, SLC7A4, SLC7A5, SLC7A14, SLC1A4, AKT1, SLC6A7, SLC7A2, SLC7A1, SLC6A6, SLC38A1, SLC15A4, SLC43A2	18	0.00108276	2.96547
CA3	Downregulated	GOTERM_BP_FAT	GO:0048168~regulation of neuronal synaptic plasticity	EGR1, PPFIA3, RAB3A, SLC8A2, EGR2, NCDN, SNCA, BCAN, SYNGR1, VGF, SHANK3, EPHB2, SHISA6, SHISA8, PLK3, DLG4, CAMK2B, SYNGAP1, CAMK2A, UNC13A	20	0.00074804	3.12608
CA3	Downregulated	GOTERM_BP_FAT	GO:0048168~regulation of neuronal synaptic plasticity	EGR1, PPFIA3, RAB3A, SLC8A2, EGR2, NCDN, SNCA, BCAN, SYNGR1, VGF, SHANK3, EPHB2, SHISA6, SHISA8, PLK3, DLG4, CAMK2B, SYNGAP1, CAMK2A, UNC13A	20	0.00074804	3.12608
CA3	Downregulated	GOTERM_BP_FAT	GO:0009790~embryo development	GDF1, PDGFB, ZFP335, LMO4, TGFB3, CNOT3, JAG2, VPS52, FLCN, CTNNB1, WDR74, ATP2B2, ETL4, BCR, EMX1, EMG1, RXRB, RXRA, VANGL2, MED12, ARID1A, VASH1, LHFPL5, NDEL1, HES5, DLL4, FOXG1, ROR2, PYGO2, MAPK7, COL1A1, SMARCA4, ADD1, DEAF1, FGFR1, CDK5R1, ELL, SOX2, PTK7, DSCAML1, LRIG1, KEAP1, SOX9, SRF, XAB2, EPHB2, PFN1, FBXW8, LHX2, FBXW4, CLASP1, MAFG, DVL3, DNMT3A, EHMT1, ABR, MAP2K1, HTT, SMAD4, IC…	143	0.000746643	3.12689
CA3	Downregulated	GOTERM_BP_FAT	GO:0034762~regulation of transmembrane transport	KCNC1, SNCA, STOML1, GJA1, KCNJ12, KCNJ11, KCNJ14, AKT1, GRIN2D, WNK4, DLG4, CHRNA4, KCNQ2, KCNG4, IRS2, SCN2B, SLC25A4, CACNG8, MINK1, STIM1, CACNG4, WNK2, SLC9A3R1, GNB5, PLA2G6, RELN, KCNH2, CLCN2, CACNB1, HK1, AZIN2, AGRN, HCN3, NOS1, OPRL1, HTT, KCNB1, CACNA1I, ASIC2, CBARP, NLGN2, TMEM110, NLGN3, ATP1A2, SHANK1, DBI, SHANK3, VDAC1, ARF1, PLCG1, KCNJ9, BAX, GRK6, CACNA1G, CACNA1H, CACNA1E, M…	66	0.000565962	3.24721
CA3	Downregulated	GOTERM_BP_DIRECT	GO:0006468~protein phosphorylation	BCKDK, PDGFB, NUAK1, FASTK, PRKAG1, PINK1, DMPK, AKT1, ACVR1B, CSNK2A1, HSF1, WNK4, MAP3K9, CDK10, BRD4, CDK16, SIK3, CSNK1G2, LIMK1, PICK1, PKN1, MINK1, CDK9, WNK2, CDK5, DAPK3, SRPK1, MARK2, MAST3, MAST1, KSR2, SCYL1, HIPK2, MAP3K10, CDK11B, MAPK7, KSR1, MAP3K13, MAP3K12, MAP3K11, CDK5R1, STK11, BRSK2, PTK7, HK1, EPHA10, TRIB2, SRC, EPHB2, EPHB6, SNRK, STK40, TTBK1, LMTK2, DCLK2, CAMK2B, CAMK2A…	81	0.000550947	3.25889
CA3	Downregulated	GOTERM_BP_FAT	GO:0051098~regulation of binding	PDGFB, CYP2D4, CTNNB1, AES, HSF1, HEY1, SMARCD3, BRD4, GOLGA2, TFIP11, DAB2IP, PTPRF, ARHGEF7, SOX11, CDK9, CDK5, CTNNBIP1, SMO, ARRB1, JUN, HIPK2, PYGO2, ZFPM1, CARM1, ADD2, ADAM15, SMARCA4, ADD1, WFIKKN1, STUB1, APLP2, SRC, RGMA, EPHB6, CRMP1, LHX2, PKD1, AGRN, MEPCE, ERCC2, SPPL3, TMBIM6, TRIM28, SMAD4, SKI, RFNG, DVL1, DOT1L, HDAC5, HDAC4, CSNK1E, BAX, ABL2, CALM2	54	0.000543886	3.26449
CA3	Downregulated	GOTERM_BP_FAT	GO:0070997~neuron death	SNCB, SNCA, TGFB3, GRIK5, PINK1, ITSN1, CTNNB1, HSF1, BOK, DNAJC5, AGAP2, MT3, EGR1, PTPRF, MAGI1, PIGT, SIGMAR1, CDK5, VEGFB, ASCL1, GRM4, BTG2, JUN, HIPK2, MAP3K12, FAIM2, MAP3K11, TNFRSF21, CDK5R1, SSH1, CRLF1, EGLN1, TMEM259, AKT1S1, SNRK, ATN1, AGRN, NOS1, HTT, KCNB1, FZD1, DPYSL4, NR4A3, AMBRA1, ZFP746, SOD2, HYOU1, HDAC4, TBC1D24, LRP1, GSK3A, FYN, BAX, VSTM2L, MTOR, IKBKB, SYNGAP1, CACNA1…	59	0.000527427	3.27784
CA3	Downregulated	GOTERM_BP_FAT	GO:0007167~enzyme linked receptor protein signaling pathway	GDF1, PDGFB, LTBP4, SNCA, FST, TGFB3, CSPG4, STOML1, FLCN, ADORA1, CTNNB1, SLC2A8, EIF4EBP2, RAPGEF1, ADAM9, MVB12B, DAB2IP, IRS2, BCR, MAGI2, SOGA1, PTPRF, BAIAP2, SOCS7, PTPRT, SOCS5, IRS1, VEGFB, ADRM1, HES5, FAM72A, JUN, COL1A2, ROR2, PELO, COL1A1, ADGRA2, GLG1, FGFR1, CDK5R1, STK11, EPHA10, EPHB3, SOX9, PXN, SRC, EPHB2, EPHB6, AKT1S1, RNF165, NDRG4, BMP1, SMAD7, RHBDF1, SMAD4, SKI, SMAD1, FU…	109	0.000433674	3.36284
CA3	Downregulated	GOTERM_BP_FAT	GO:0022411~cellular component disassembly	HBS1L, TGFB3, PINK1, TXLNA, CSPG5, SLC1A4, HTR1A, HSF1, BOK, SMARCD3, ATG2A, BOC, NSF, DEDD2, GOLGA2, TFIP11, PHYHIP, TMEM203, STMN3, MICAL3, ARID1A, DCTN1, CLEC16A, NDEL1, CAPN10, CLIP2, KIF19, PELO, MAP3K12, ADD2, WDR45, ADD1, SMARCA4, APC2, KATNB1, CAPZB, NCKAP5L, CDC37, RIMS3, TOMM7, SQSTM1, CLASP1, NTHL1, NEFM, GBA, UPF1, MAP2K1, MAP1A, COX8A, AMBRA1, WIPI2, SLC35C1, PPP1R9B, PLK3, MYH9L1, U…	63	0.000433538	3.36297
CA3	Downregulated	GOTERM_BP_DIRECT	GO:0050885~neuromuscular process controlling balance	RBFOX2, CAMTA1, IGDCC3, BCR, ABR, ADCY5, NLGN2, NR4A3, SHANK1, APLP2, SHANK3, FOXS1, ATP2B2, RAC3, GRIN2C, DLG4, CAMK2B, CNTNAP1, ABL2, CACNA1A	20	0.000412997	3.38405
CA3	Downregulated	GOTERM_BP_FAT	GO:0032446~protein modification by small protein conjugation	MAEA, BTRC, MED24, RNF216, ZNRF1, KLHL2, CTNNB1, CUL7, BTBD2, CUL9, PELI3, CYHR1, RNF145, DDRGK1, UBR4, MED12, SOCS7, SOCS5, BRAP, BTBD9, PIAS4, ARRB1, MIB2, TRIM32, ASB1, FBXL2, ASB6, FZR1, RAB40C, UBE2V1, KEAP1, HSPA1A, UBE2QL1, FBXW8, FBXW5, RNF165, KBTBD6, HECTD3, HECTD4, TRAF7, UNKL, TRAF3, SMAD7, FBXO2, FDPS, MARCH10, HSPBP1, KCTD10, HDAC4, TULP4, RNF4, OTUB1, SMURF1, MTOR, KCTD13, TOLLIP, …	101	0.000380338	3.41983
CA3	Downregulated	GOTERM_BP_FAT	GO:0017156~calcium ion regulated exocytosis	RAB3A, CPLX1, SYT3, GRIK5, SYT7, RIMS3, TRIM9, APBA2, SCAMP5, STX1A, STX4, KCNB1, SYT11, CACNA1I, CBARP, RPH3A, STX1B, CDK5, NOTCH1, ARF1, OTOF, CACNA1G, SPTBN2, CACNA1H, ADGRL1, CACNA1C, CACNA1A, UNC13A	28	0.000168492	3.77342
CA3	Downregulated	GOTERM_BP_FAT	GO:0009894~regulation of catabolic process	LDLR, BTRC, SNCA, GJA1, RGP1, CBFA2T3, ADORA1, OS9, AKT1, USP19, BAG6, CSNK2A1, HSF1, GRIN2C, PSMD2, AGAP2, CCAR2, NSF, ADAM9, MT3, GTPBP1, DAB2IP, IRS2, ANKS1A, DDRGK1, BANP, ACTN3, SOCS5, IRS1, RNF180, CLEC16A, BTG2, ARRB1, SGSM3, CD81, TRIM32, CRTC3, FZR1, APC2, EGLN1, TMEM259, SOX9, AZIN2, STUB1, TRIB2, RGMA, TNRC6C, PKD1, SCARB1, GBA, UBXN1, DLGAP1, UPF1, SMAD7, PHB, OSBPL7, RHBDF1, SMAD4, F…	74	0.000146124	3.83528
CA3	Downregulated	GOTERM_BP_FAT	GO:0006366~transcription from RNA polymerase II promoter	SCAF1, GDF1, FST, MED24, CTNNB1, SUPT5H, DAB2IP, RXRB, RXRA, MED12, ZHX3, TBR1, PPARGC1B, PIAS4, HES5, MTF1, JUN, RGCC, FOXG1, ZNHIT1, ROR2, PELO, MAPK7, SUPT6H, CRTC3, DEAF1, CRTC2, ELL, CRTC1, TAGLN3, PFN1, ATN1, LHX2, AGRN, TCF4, TCF25, MEPCE, DNMT3A, ESRRA, BMP1, MAP2K1, SMAD7, PHB, MAML1, CREBBP, MAML2, SMAD4, KLF16, SKI, SMAD1, USF1, ZFP746, USF2, DVL1, NOTCH3, NOTCH1, SAP130, RNF4, IRF2BPL…	211	0.000137372	3.8621
CA3	Downregulated	GOTERM_BP_FAT	GO:0010498~proteasomal protein catabolic process	MAEA, BTRC, RNF216, RNF187, CBFA2T3, ZNRF1, OS9, AKT1, FBXL19, USP19, BAG6, TRIM9, BTBD2, PSMD2, TMUB1, FBXL15, CCAR2, AGAP3, RNF145, DAB2IP, DDRGK1, SOCS5, UBE2H, BTBD9, RNF180, CLEC16A, PSMA5, ARRB1, FBXL2, FZR1, ABTB2, KEAP1, STUB1, TRIB2, PSMB5, PRPF19, RNF126, NR1D1, FBXW5, RNF165, FBXW4, HECTD3, FBXW11, GBA, UBXN1, SMAD7, NSFL1C, OSBPL7, FBXO2, DVL1, HSPBP1, KCTD10, RNF44, PLK3, CSNK1D, RNF…	61	8.76126e-05	4.05743
CA3	Downregulated	GOTERM_BP_FAT	GO:0044085~cellular component biogenesis	ALOXE3, ATG101, SNCA, NELL2, STOML2, MED24, SYT7, SART3, CTNNB1, WDR74, AQP11, CHRNA4, BAHCC1, RAPGEF1, ADGRB2, DAB2IP, MAGI2, PCBD2, EMG1, MDGA1, RXRA, VANGL2, BSN, DCTN1, JUP, RCC2, HES5, JUN, RGCC, FBLL1, PDE4DIP, DBN1, UNC13A, ADD2, HIGD2A, ADD1, CRTC3, CRTC2, PALM, TNRC18, CRTC1, ELN, HSPA1A, BOP1, EPHB3, CAPZB, XAB2, NPRL3, PXN, EPHB2, PPAN, PFN1, TPGS1, RAC3, AGRN, TCF4, RPS24, MAP2K1, TAO…	315	7.49987e-05	4.12495
CA3	Downregulated	GOTERM_BP_FAT	GO:0045936~negative regulation of phosphate metabolic process	SLC27A1, PDGFB, SRCIN1, HMGCR, SNCA, NCS1, LRRC4B, FLCN, CBFA2T3, SPRY4, AKT1, SPRY2, BAG4, SPRED2, DLG3, SPRED3, CTDSP2, RAPGEF1, PPP1R37, DAB2IP, IRS2, INPPL1, RIMBP2, PKN1, CAMSAP3, ACTN3, SOCS5, WNK2, SLC9A3R1, MYADM, SLC7A14, RUBCN, PPM1F, NCK2, FAM72A, ARRB1, JUN, ZFYVE28, PEBP1, MAPK7, SEMA4D, MIDN, PALM, RTN4RL1, ELL, EGLN1, PAQR3, DUSP18, AKT1S1, CD2BP2, INPP5J, MAS1, MLLT1, RTN4RL2, NYX…	88	6.26992e-05	4.20274
CA3	Downregulated	GOTERM_BP_FAT	GO:0001941~postsynaptic membrane organization	MAGI2, SSH1, NRXN2, NLGN2, NLGN3, ZMYND8, SHANK3, DVL1, HTR1A, DLG4, RELN, AGRN, ETV5, DBN1, LRP5	15	5.70088e-05	4.24406
CA3	Downregulated	GOTERM_BP_FAT	GO:0021543~pallium development	FGFR1, CDK5R1, PLXNA3, SOX2, BCAN, XRCC1, UQCRQ, XAB2, SRF, GLI3, CTNNB1, SLC32A1, ROBO1, LHX2, MAS1, POU3F3, DCLK2, POU3F2, EIF2B2, NEFM, KIRREL3, DAB2IP, EMX1, MDGA1, PTPRS, SOCS7, NR4A3, ADGRG1, CDK5, ASCL1, SMO, FEZF2, PPP1R9B, NDEL1, LRP1, BTG2, TRAPPC9, BAX, FOXG1, HTR6, PEBP1, RELN, KDM6B	43	4.3317e-05	4.36334
CA3	Downregulated	GOTERM_BP_FAT	GO:0071310~cellular response to organic substance	ADCY3, GDF1, LTBP4, ADCY5, SNCA, FST, ADCY6, MED24, RPLP2, RANGAP1, CTNNB1, DCPS, PLOD1, PELI3, RAPGEF1, ADAM9, DAB2IP, DDRGK1, MAGI2, BCR, PTPRF, POLG, RXRB, RXRA, MED12, PTPRN, RPTOR, PPARGC1B, VEGFB, JUP, SSTR3, PIAS4, HES5, JUN, RYR1, ROR2, PELO, MAPK7, ADGRA2, DBN1, ADD1, GLG1, NFKBIB, ELN, HSPA1A, PXN, CDC37, SLC11A2, PFN1, TCF4, DNMT3A, ESRRA, LAMTOR3, BMP1, MAP2K1, SMAD7, PHB, OSBPL7, CRE…	260	3.87288e-05	4.41197
CA3	Downregulated	GOTERM_BP_FAT	GO:0048675~axon extension	MEGF8, PLXNA3, CDK5R1, PLXNA4, PLXNA1, SRF, LAMB2, MAPT, SEMA7A, LHX2, BCL11A, EIF2B2, DSCAM, ISLR2, MT3, LIMK1, PLXNB1, RTN4R, NLGN3, NTN1, CDK5, DVL1, SLIT3, SMO, SEMA6A, SEMA6B, NDEL1, SEMA6C, ULK1, SEMA4D, DBN1	31	2.39279e-05	4.62109
CA3	Downregulated	GOTERM_BP_FAT	GO:0090066~regulation of anatomical structure size	CASR, PPARD, PLXNA3, PLXNA4, E2F4, LRRC8A, PLXNA1, HIP1R, HMGCR, PREX1, ADCY6, GJA1, ADORA1, TTL, AKT1, ATP2B2, BAG4, CTTN, HTR1A, MAPT, SEMA7A, EIF2B2, ISLR2, MT3, DSCAM, TRPM4, LIMK1, BAIAP2, PICK1, SLC9A3R1, MYADM, CDK5, RPTOR, ARPC1A, NCK2, NDEL1, PLA2G6, SEMA4D, DBN1, ADD2, ADD1, MEGF8, CDK5R1, SSH1, ELN, HSPA1A, CX3CL1, CAPZB, SRF, PFN1, RGMA, AKT1S1, BCL11A, WIPF2, BRK1, RAP1GAP2, NEFM, WD…	87	1.74348e-05	4.75858
CA3	Downregulated	GOTERM_BP_FAT	GO:0006928~movement of cell or subcellular component	KIFC2, ADCY3, TUBB2B, PTPN23, AMOTL1, ADORA1, CTNNB1, SEMA7A, ADAM9, DAB2IP, BCR, MAGI2, SCN2B, PTPRF, MDGA1, VANGL2, TBR1, DCTN1, VASH1, MARK2, JUP, VEGFB, RCC2, NAV1, JUN, RGCC, FOXG1, HTR6, ROR2, ADGRA2, KIF26A, MYO18A, DBN1, CDK5R1, EPHB3, EPHB2, PFN1, LAMB2, ATN1, CRMP1, LHX2, AGRN, SPNS2, KLF7, ABR, MAP2K1, RHBDF1, SMAD4, CELSR2, KIF3C, GAS6, DVL1, SEMA6A, SEMA6B, NOTCH1, SEMA6C, LAMA5, EPH…	216	1.06915e-05	4.97096
CA3	Downregulated	GOTERM_BP_FAT	GO:0045665~negative regulation of neuron differentiation	CDK5R1, PLXNA3, FKBP4, ADCY5, SOX2, ADCY6, CSPG4, DISP3, SOX9, PAQR3, GLI3, EPHB2, PRPF19, RGMA, HEY1, CRMP1, INPP5J, XYLT1, GORASP1, SEMA7A, BCL11A, RAP1GAP2, MT3, DTX1, INPPL1, RTN4R, DPYSL3, NLGN3, CDK5, STX1B, NTN1, GPR37L1, NOTCH3, ASCL1, FEZF2, SEMA6A, SEMA6B, NOTCH1, LRP1, SEMA6C, HES5, ULK1, GSK3A, FOXG1, SEMA4D, CARM1, SYNGAP1, SEZ6	48	8.52068e-06	5.06953
CA3	Downregulated	GOTERM_BP_FAT	GO:0098815~modulation of excitatory postsynaptic potential	STX1A, SSH1, NLGN2, NLGN3, SHANK1, ZMYND8, STX1B, SHANK3, DMPK, DVL1, TBC1D24, CELF4, DLG4, RELN, CUX2, DBN1, WNT7A	17	3.75274e-06	5.42565
CA3	Downregulated	GOTERM_BP_FAT	GO:0042063~gliogenesis	WASF3, PDGFB, CSPG4, NF1X, APCDD1, GLI3, CTNNB1, MMP24, AKT1, BOK, EIF2B2, GPC1, MT3, EGR1, DAB2IP, EGR2, EMX1, ARHGEF7, SOX11, PICK1, MED12, HDAC10, SOCS7, EEF2, CDK5, GPR37L1, ASCL1, SMO, HES5, LAMC3, NAB2, FOXG1, ROR2, RELN, GAP43, SMARCA4, TNFRSF21, CDK5R1, SOX9, PRPF19, LINGO1, LAMB2, DNER, POU3F2, ETV5, ERCC2, MAP2K1, DTX1, SKI, NLGN3, ADGRG1, DBI, ATXN1, RNF112, TENM4, NOTCH1, WDR1, MTOR, …	59	2.9631e-06	5.52825
CA3	Downregulated	GOTERM_BP_FAT	GO:0055085~transmembrane transport	SLC22A17, KCNC1, SLC9A7, CHERP, ATP6AP1, SNCA, STOML1, GRIK5, STOML2, SLC7A4, SLC7A5, SLC26A11, SLC2A8, ATP2B2, SLC2A6, SLC25A25, SLC2A3, GRIN2C, SLC25A23, GRIN2D, WNK4, CHRNA4, SLC8B1, SLC4A3, IRS2, BCR, SLC12A9, SCN2B, ABCC10, STIM1, WNK2, PEX26, SLC25A38, RYR1, RELN, SLC38A1, SEC61G, SLC38A5, ORAI2, ABCA7, SLC38A3, CLCN2, PANX2, CACNB1, COX7C, SLC38A10, TMEM63C, SFXN5, ATP6V0B, SLC11A2, TTYH3,…	177	2.88811e-06	5.53939
CA3	Downregulated	GOTERM_BP_FAT	GO:0021953~central nervous system neuron differentiation	FGFR1, PLXNA3, PLXNA4, LMO4, ZFP335, SOX2, NF1X, SZT2, EPHB3, UQCRQ, GLI3, EPHB2, CTNNB1, IGHMBP2, ATP2B2, LINGO1, ROBO1, RAC3, POU3F4, DCLK2, CHD5, EMX1, MDGA1, SPTBN4, CDK5, TBR1, SHANK3, SLIT3, ASCL1, ATXN2, SMO, GBA2, FEZF2, NDEL1, BTG2, HES5, ULK1, DLL4, FOXG1, SMARCC2, CHRNB2, PTCH1, WNT7A, CACNA1A, FAIM2	45	2.28802e-06	5.64054
CA3	Downregulated	GOTERM_BP_FAT	GO:0030900~forebrain development	KCNC1, PLXNA3, PLXNA4, NDST1, ZFP335, BCAN, SZT2, XRCC1, GLI3, UQCRQ, CTNNB1, ROBO1, SEMA7A, EIF2B2, MKL1, KIRREL3, DAB2IP, EMX1, MDGA1, SOCS7, PTPRS, ARID1A, CDK5, TBR1, SLIT3, NUMBL, INHBB, ASCL1, SMO, NDEL1, SSTR3, BTG2, HES5, TRAPPC9, FOXG1, HTR6, PEBP1, RELN, NRGN, KDM6B, SMARCA4, FGFR1, CDK5R1, SOX2, EPHB3, XAB2, SRF, APLP2, SRC, EPHB2, SLC32A1, RAC3, LHX2, MAS1, POU3F4, POU3F3, DCLK2, POU3…	80	1.46514e-06	5.83412
CA3	Downregulated	GOTERM_BP_FAT	GO:1902580~single-organism cellular localization	CHERP, SNCA, SRP68, ADCY6, SYT3, TSPAN5, TGFB3, GRIK5, STOML2, SYT7, ADORA1, CTNNB1, PACSIN1, HTR1A, ANK1, TUB, DAB2IP, BCR, MAGI2, TMEM201, PICK1, RPH3A, BICD2, BTBD9, DCTN1, JUP, NDEL1, JUN, PEX26, RELN, MAPK7, UNC13A, PALM, CDK5R1, SSH1, NFKBIB, KATNB1, CACNB1, KEAP1, LLGL1, RIMS3, TOMM7, CLASP1, AGRN, SEC61A1, AP2M1, SPPL3, MAP2K1, HTT, KCNB1, SYT11, SPTBN4, SMAD4, TOMM40, TMEM110, NR4A3, KIF…	143	1.02415e-06	5.98964
CA3	Downregulated	GOTERM_BP_FAT	GO:0030073~insulin secretion	MIDN, CASR, PPARD, CPLX1, HMGCR, ADCY5, NNAT, BRSK2, GJA1, ILDR2, GPR68, SIDT2, VGF, KCNJ11, NR1D1, GPR27, RAB11B, CDK16, TRPM4, STX4, IRS2, NOS1, PFKL, HTT, KCNB1, MCU, NLGN2, PFKM, PTPRN, IRS1, RPTOR, INHBB, RAB11FIP5, CAPN10, UCP2, ARRB1, PLA2G6, ABAT, CACNA1E, CACNA1C, GHSR, AACS, LRP5	43	1.00767e-06	5.99668
CA3	Downregulated	GOTERM_BP_FAT	GO:0009892~negative regulation of metabolic process	CYP2D4, U2AF2, SNCA, FST, ADORA1, CTNNB1, MAGED1, GRIN2C, BAHCC1, PELI3, SUPT5H, RAPGEF1, CCAR2, PPP1R37, DAB2IP, BCR, RXRA, ZHX3, WNK2, PPARGC1B, FRY, VEGFB, PIAS4, HES5, JUN, FOXG1, ZNHIT1, MAPK7, SUPT6H, DEAF1, CRTC3, GLG1, PALM, CDK5R1, TNRC18, ELL, HSPA1A, SERPINH1, TAGLN3, DUSP18, ATN1, TCF4, TCF25, MEPCE, DNMT3A, ESRRA, MAP2K1, SMAD7, PHB, CREBBP, KLF16, SMAD4, SKI, ZFP746, CAMK2N2, GAS6, …	308	3.53489e-07	6.45162
CA3	Downregulated	GOTERM_BP_FAT	GO:0050890~cognition	ADCY3, ADCY1, FOSL2, HMGCR, SOBP, ADORA1, SLC1A4, PAK6, FOS, DGCR2, EIF4EBP2, MAPT, CHRNA4, SHC3, JAKMIP1, EGR1, EGR2, NRXN2, PCDH8, CDK5, TBR1, BTBD9, GRM4, AAAS, BTG2, CCND2, JUN, HTR6, C1QL1, PLA2G6, RELN, CUX2, NRGN, DEAF1, ABCA7, CRTC1, CTNND2, SRF, EPHB2, AMPH, SLC11A2, NDRG4, NPTX2, SLC8A2, HTT, SLC12A5, ATP1A3, NLGN3, ATP1A2, SHANK1, SHANK2, DBI, SHANK3, VDAC1, ATXN1, PPP1R9B, PRKAR1B, CH…	63	3.02124e-07	6.51981
CA3	Downregulated	GOTERM_BP_FAT	GO:0023061~signal release	CASR, PPARD, HMGCR, LTBP4, ADCY5, PNKD, FST, SNCA, NELL2, SYT3, GRIK5, GJA1, ILDR2, SYT7, SIDT2, VGF, ADORA1, KCNJ11, TRIM9, SLC8B1, CDK16, NSF, TRPM4, STX4, STX1A, IRS2, CCKBR, NRXN2, PFKL, ARHGEF7, MADD, SOX11, MCU, PFKM, PTPRN, RPH3A, STX1B, IRS1, RPTOR, INHBB, RAB11FIP5, CAPN10, ARRB1, OTOF, HTR6, RAB15, ABAT, PLA2G6, UNC13A, MIDN, FGFR1, PPFIA3, RAB3A, CPLX1, NNAT, BRSK2, GPR68, RIMS3, NR1D1…	82	1.95987e-07	6.70777
CA3	Downregulated	GOTERM_BP_FAT	GO:0050770~regulation of axonogenesis	MEGF8, CDK5R1, PLXNA3, PLXNA4, PLXNA1, SSH1, STK11, EPHB3, SRF, TTL, EPHB2, RGMA, CTTN, ROBO1, MAPT, SEMA7A, BCL11A, POU3F2, AGRN, EIF2B2, NEFM, DSCAM, ISLR2, MT3, GOLGA2, MAP2K1, LIMK1, PLXNB1, RTN4R, CDK5, NTN1, TBR1, SLIT3, MARK2, SEMA6A, FEZF2, SEMA6B, NDEL1, SEMA6C, ULK1, SMURF1, SEMA4D, SYNGAP1, DBN1, WNT7A, CACNA1A	46	1.90509e-07	6.72009
CA3	Downregulated	GOTERM_BP_FAT	GO:0007010~cytoskeleton organization	PLXNA3, MAEA, PDGFB, TUBB2B, TUBB2A, CROCC, SNCA, TGFB3, TTL, CTNNB1, PACSIN1, HTR1A, CUL7, CUL9, BCR, STMN3, BAIAP2, VANGL2, PICK1, BSN, SIPA1L3, BICD2, DCTN1, PPARGC1B, MARK2, FRY, ARPC1A, NDEL1, NAV1, ARRB1, RGCC, TRIM32, FLII, CLIP2, MAP7D1, MYO18A, DBN1, ADD2, SPTB, ADD1, CHMP2A, PALM, CDK5R1, AGFG1, SSH1, ELN, KATNB1, PTK7, SOX9, CAPZB, SRF, SRC, PXN, LLGL1, PFN1, TPGS1, FBXW5, CRMP1, RAC3,…	165	1.33354e-07	6.87499
CA3	Downregulated	GOTERM_BP_FAT	GO:0099565~chemical synaptic transmission, postsynaptic	SSH1, SNCA, GRIK5, CX3CL1, ADORA1, DMPK, GRIN2C, GRIN2D, DLG4, CHRNA4, STX1A, NLGN2, NLGN3, IGSF9B, SHANK1, STX1B, CDK5, SHANK3, DVL1, ATXN1, TBC1D24, CELF4, ABAT, RELN, CUX2, DBN1, WNT7A, SEZ6	28	4.76914e-08	7.32156
CA3	Downregulated	GOTERM_BP_FAT	GO:0051049~regulation of transport	U2AF2, ADCY5, PNKD, SNCA, FST, SYT3, NELL2, STOML1, PTPN23, RANGAP1, SYT7, SIDT2, ADORA1, CTNNB1, ATP2B2, RUNDC1, HTR1A, GRIN2D, WNK4, CHRNA4, ADAM9, DAB2IP, BCR, MAGI2, SCN2B, WNK2, BTBD9, RPTOR, DCTN1, JUP, RGCC, HTR6, RAB15, ABAT, MAPK7, MYO18A, DBN1, UNC13A, SUPT6H, ADD1, SIVA1, CDK5R1, CLCN2, NFKBIB, CACNB1, HSPA1A, RIMS3, AGRN, SGIP1, ASPSCR1, SPPL3, ABR, MAP2K1, RHBDF1, SMAD4, TMEM110, ATP…	252	6.4152e-09	8.19279
CA3	Downregulated	GOTERM_BP_FAT	GO:1905114~cell surface receptor signaling pathway involved in cell-cell signaling	BTRC, SNCA, GRIK5, APCDD1, AMOTL2, GLI3, ADORA1, LGR5, DMPK, CTNNB1, CSNK2A1, AES, GRIN2C, GRIN2D, DLG4, CHRNA4, RAPGEF1, CCAR2, TRPM4, EGR1, DAB2IP, STX1A, CSNK1G2, VANGL2, MED12, TLE3, TLE2, SLC9A3R1, CDK5, STX1B, DAPK3, MARK2, CTNNBIP1, SMO, MGAT3, NDEL1, CELF4, ABAT, PYGO2, ROR2, RELN, CUX2, COL1A1, DBN1, SEZ6, SMARCA4, SSH1, APC2, STK11, SOX2, CTNND2, PTK7, CX3CL1, SOX9, CALCOCO1, SRC, AMER3…	85	4.17123e-09	8.37974
CA3	Downregulated	GOTERM_BP_FAT	GO:0050803~regulation of synapse structure or activity	CLSTN3, SNCA, LRRC4B, BCAN, SYT7, VGF, SYNGR1, ADORA1, DMPK, ATP2B2, EIF4EBP2, MAPT, DLG4, ADGRB2, EGR1, DAB2IP, STX4, EGR2, PTPRF, BAIAP2, MDGA1, PICK1, NECTIN1, CDK5, STX1B, HTR6, RELN, CUX2, NRGN, NCAN, DBN1, UNC13A, PPFIA3, RAB3A, SSH1, CRTC1, CTNND2, EPHB3, ZMYND8, SRF, EPHB2, SHISA6, SHISA8, CAMK2B, AGRN, ETV5, CAMK2A, FLRT1, SLC8A2, NOS1, NCDN, HTT, KCNB1, ASIC2, NLGN2, NLGN3, SHANK2, CAMK…	69	6.41863e-11	10.1926
CA3	Downregulated	GOTERM_BP_FAT	GO:0016358~dendrite development	SRCIN1, GRIP1, PACSIN1, CUL7, ROBO1, DLG4, SS18L1, MT3, DSCAM, RBFOX2, DAB2IP, PTPRF, BAIAP2, MINK1, ARID1B, CDK5, NUMBL, NCK2, RELN, CUX2, SEMA4D, CARM1, DBN1, SEZ6, PALM, CDK5R1, STK11, CRTC1, CTNND2, EPHB3, ZMYND8, EPHB2, SLC11A2, FBXW8, GORASP1, BCL11A, OBSL1, CAMK2B, CAMK2A, KLF7, FLRT1, SLC12A5, NLGN2, CELSR2, NLGN3, SMAD1, SHANK1, SHANK3, DVL1, TBC1D24, FEZF2, PPP1R9B, SARM1, ARF1, GSK3A, …	63	1.82159e-11	10.7396
CA3	Downregulated	GOTERM_BP_FAT	GO:0065009~regulation of molecular function	CYP2D4, ZFP335, SNCA, STOML1, RANGAP1, SZT2, ITSN1, ADORA1, CTNNB1, MAGED1, DIRAS1, RUNDC1, WNK4, MAP3K9, CHRNA4, EIF2B2, RAPGEF1, CCAR2, ADAM9, PPP1R37, DAB2IP, DDRGK1, MAGI2, BCR, SCN2B, PTPRF, RXRB, VANGL2, SIPA1L2, SIPA1L3, WNK2, PPARGC1B, RPTOR, FRY, DEPDC5, JUP, RCC2, TRAPPC9, PIAS4, ACAP3, JUN, RGCC, ROR2, MAPK7, DBN1, ADD2, ADD1, CRTC3, SIVA1, CRTC2, PALM, CDK5R1, ELL, CRTC1, CACNB1, HSPA…	347	8.50853e-12	11.0701
CA3	Downregulated	GOTERM_BP_FAT	GO:0007417~central nervous system development	KCNC1, PLXNA3, PLXNA4, ZFP335, LMO4, JAG2, SZT2, XRCC1, CTNNB1, IGHMBP2, CDH22, ATP2B2, ROBO1, SEMA7A, EIF2B2, RBFOX2, IRS2, DAB2IP, BCR, EMX1, MDGA1, MED12, HDAC10, TMEM132A, SOCS7, PTPRS, ARID1A, RPH3A, TBR1, NUMBL, ASCL1, SSTR3, NDEL1, TRAPPC9, HES5, NAV2, LAMC3, DLL4, FOXG1, HTR6, ROR2, PYGO2, ABAT, RELN, ADGRA2, DBN1, SMARCA4, FGFR1, SLC38A3, CDK5R1, SOX2, DSCAML1, EPHB3, SOX9, SRF, XAB2, SR…	177	6.85896e-13	12.1637
CA3	Downregulated	GOTERM_BP_FAT	GO:0008104~protein localization	CADM3, SEC31A, CROCC, PLEKHM1, U2AF2, ADCY5, ADCY6, CHMP7, SRP68, VPS52, PTPN23, RANGAP1, SYT7, SIDT2, ADORA1, TVP23A, CTNNB1, RUNDC1, HTR1A, GRIN2C, WNK4, ADAM9, DAB2IP, MAGI2, BCR, CIZ1, VANGL2, BSN, PTPRN, DCTN1, RPTOR, JUP, PITPNM1, RCC2, JUN, PEX26, RGCC, ABAT, RAB15, MAPK7, KIF26A, DBN1, MYO18A, GLG1, PALM, CDK5R1, STK11IP, NFKBIB, CACNB1, EPHB6, GORASP1, OBSL1, AGRN, ASPSCR1, SPPL3, DVL3, …	321	4.40835e-15	14.3557
CA3	Downregulated	GOTERM_BP_FAT	GO:0007267~cell-cell signaling	SNCB, LTBP4, ADCY5, PNKD, SNCA, NELL2, FST, SYT3, SYT7, SIDT2, AMOTL2, ADORA1, CTNNB1, ATP2B2, HTR1A, GRIN2C, GRIN2D, CHRNA4, RAPGEF1, CCAR2, GJD2, DAB2IP, VANGL2, MED12, PTPRN, RPTOR, MARK2, MGAT3, SSTR3, HTR6, RAB15, ABAT, ROR2, DBN1, UNC13A, CRTC1, CACNB1, EPHB2, RIMS3, TPGS1, RAC3, AGRN, DVL3, SMAD4, CELSR2, CAMK2N2, PORCN, DVL1, VDAC1, NOTCH1, ARF1, FJX1, GRK6, CHRNB2, GHSR, PPARD, GJA1, APC…	222	5.68923e-19	18.2449
CA3	Downregulated	GOTERM_BP_FAT	GO:0023051~regulation of signaling	PEAR1, STOML1, ITSN1, CTNNB1, MAGED1, DIRAS1, HTR1A, MAP3K9, CCAR2, ADAM9, MAGI2, DDRGK1, PTPRF, RXRB, SIPA1L2, MED12, SIPA1L3, RPTOR, BTBD9, BRAP, JUN, ROR2, ABAT, PELO, MAPK7, UNC13A, CRTC3, NFKBIB, CRTC1, HSPA1A, BCL2L2, DUSP18, TCF4, IQSEC1, SPPL3, DVL3, TAOK2, MAP2K1, PHB, CAMK2N2, GAS6, DVL1, ARF1, HGS, RGS8, SMURF1, SLC9A1, NISCH, MGRN1, HSF1, MAPT, TMEM101, BRD4, FBXL15, STX4, ARHGEF7, CA…	404	2.93052e-20	19.5331
CA3	Downregulated	GOTERM_BP_FAT	GO:0048812~neuron projection morphogenesis	ADCY1, PLXNA3, PLXNA4, SRCIN1, PLXNA1, ZFP335, SYT3, SZT2, TTL, PACSIN1, CUL7, ROBO1, UNC5A, SEMA7A, LRRC55, EIF2B2, SS18L1, ISLR2, DSCAM, RBFOX2, DAB2IP, EMX1, PTPRF, PLXNB1, BAIAP2, VANGL2, TBR1, NUMBL, NDEL1, FOXG1, RELN, KIF26A, DBN1, UNC13A, CDK5R1, STK11, EPHB3, NRN1, SRF, LLGL1, EPHB2, SLC11A2, FBXW8, LAMB2, GORASP1, RNF165, CRMP1, LHX2, LRFN1, OBSL1, AGRN, LRFN4, KLF7, MAP2K1, B4GAT1, CPN…	135	3.76913e-21	20.4238
CA3	Downregulated	GOTERM_BP_FAT	GO:0007399~nervous system development	TUBB2B, XRCC1, CTNNB1, CDH22, CUL7, MAGI2, SCN2B, PTPRF, RXRB, RXRA, MED12, PTPRS, BSN, TMEM132A, MARK2, SSTR3, TRAPPC9, JUN, FOXG1, ZNHIT2, ROR2, ABAT, UNC13A, CRTC1, HSPA1A, XAB2, PFN1, DAGLA, ATN1, RAC3, GORASP1, OBSL1, TCF4, DVL3, DNMT3A, SPHK2, MAP2K1, ROGDI, GAS7, KIF3C, GAS6, DVL1, ARF1, SMURF1, RERE, GRIP1, RTN1, MMP24, POMGNT2, XYLT1, DYNLL2, MAPT, SNPH, ARHGEF7, SDK2, NECTIN1, GPR37L1, …	396	4.63224e-34	33.3342
CA3	Downregulated	GOTERM_CC_FAT	GO:0000118~histone deacetylase complex	NACC2, HDAC10, HR, MBD3, PHF12, HDAC5, HDAC4, SALL2, CSNK2A1, SAP130, GATAD2A, CHD5, RERE, NCOR2, CHD3	15	0.0371188	1.43041
CA3	Downregulated	GOTERM_CC_DIRECT	GO:0005905~clathrin-coated pit	SH3BP4, CTTN, LDLR, HIP1R, ARRB1, RAB35, NECAP1, TNK2, ITSN1, EPN1, SGIP1, AP2M1	12	0.0355974	1.44858
CA3	Downregulated	GOTERM_CC_FAT	GO:0098589~membrane region	ADCY3, SLC27A1, LDLR, HIP1R, GRIP1, ADCY5, ADCY6, GJA1, STOML2, EPS15L1, ITSN1, CTNNB1, ATP2B2, CTTN, SLC2A3, UNC5A, NECAP1, CYS1, GPC1, FLOT2, EEF2, SLC9A3R1, MYADM, IRS1, DAPK3, SMO, ARRB1, BACE1, SGCA, FAIM2, EPN1, RTN4RL1, HK1, SERPINH1, SRC, SORBS1, SCARB1, RTN4RL2, SGIP1, AP2M1, LAMTOR3, NOS1, ATP1A1, ATP1A2, FURIN, ADGRG1, VDAC1, CORO1C, SH3BP4, NUP62, FYN, RAB35, PRKAR1A, CACNA1H, PTCH1, …	61	0.0354497	1.45039
CA3	Downregulated	GOTERM_CC_FAT	GO:0030863~cortical cytoskeleton	ACTB, MAEA, FLOT2, SPTBN4, BSN, MTSS1L, MYADM, CAPZB, LLGL1, PPP1R9B, CTTN, ANK1, LASP1, MYH9L1, SPTBN2, DLG4, CLASP1, WDR1, CAP1, SPTAN1, SPTB	21	0.0269315	1.56974
CA3	Downregulated	GOTERM_CC_DIRECT	GO:0005891~voltage-gated calcium channel complex	CACNA1I, CACNA1G, CACNB1, CACNA1H, CACNG4, CACNA1E, CACNA1C, CACNA1A, CACNA1B	9	0.0192132	1.7164
CA3	Downregulated	GOTERM_CC_DIRECT	GO:0005891~voltage-gated calcium channel complex	CACNA1I, CACNA1G, CACNB1, CACNA1H, CACNG4, CACNA1E, CACNA1C, CACNA1A, CACNA1B	9	0.0192132	1.7164
CA3	Downregulated	GOTERM_CC_DIRECT	GO:0098793~presynapse	SNCB, SNCA, SYT3, GRIK5, LRRC4B, CAD, SYT7, ITSN1, SYNGR1, ADORA1, SLC2A8, RABAC1, PACSIN1, SLC2A3, TRIM9, SNPH, DLG4, DNAJC5, SV2A, CDK16, NSF, SCAMP5, MT3, STX6, STX4, STX1A, NRXN2, POLG, MADD, PICK1, BSN, PCDH8, PTPRN, RPH3A, STX1B, GRM4, NDEL1, NCOA2, OTOF, C1QL1, RAB15, PEBP1, ERC1, UNC13A, EPN1, PPFIA3, RAB3A, PPFIA4, CPLX1, AMPH, RIMS3, SLC32A1, SYN3, RAB11B, APBA2, AP3D1, CAMK2A, SGIP1, A…	15	0.0108799	1.96337
CA3	Downregulated	GOTERM_CC_DIRECT	GO:0005874~microtubule	KIFC2, TUBB2B, TUBB2A, FKBP4, KATNB1, TTLL1, DYNLL2, MAPT, CAMSAP1, TUBB5, DCLK2, TUBA1A, DYNC1H1, KIF21B, TUBB3, TUBB4A, MT3, JAKMIP1, GOLGA2, SLC8A2, MAP2K1, MAP1A, RMDN3, STIM1, KIF3C, DCTN1, DVL1, CCT7, EML2, NDEL1, NCOA2, SARM1, MAP1S, GSK3A, TPPP, TBCD, ROR2, KIF19, MAP3K11	39	0.00959033	2.01817
CA3	Downregulated	GOTERM_CC_FAT	GO:0008328~ionotropic glutamate receptor complex	CPT1C, DLGAP3, CACNG8, GRIK5, CACNG4, SHANK1, NRN1, SHANK2, PORCN, SHISA6, SHISA8, GRIN2C, GRIN2D, DLG4, DLG3	15	0.0084047	2.07548
CA3	Downregulated	GOTERM_CC_FAT	GO:0005741~mitochondrial outer membrane	CYB5R3, PINK1, HK1, GJA1, NLRX1, BCL2L2, DMPK, SLC11A2, SNN, TOMM7, TOMM6, BOK, AGPAT4, MT3, CPT1C, NOS1, MSTO1, SLC25A4, PHB, RMDN3, TOMM40, PI4KB, ABCB6, VDAC1, RAB11FIP5, CAPN10, SARM1, BAX, TOMM40L, RHOT2, PEBP1, MTOR	32	0.00134399	2.8716
CA3	Downregulated	GOTERM_CC_FAT	GO:0030133~transport vesicle	SEC31A, SYT3, SNCA, SYT7, VGF, SYNGR1, RABAC1, SLC2A8, SLC2A3, TRIM9, SPRED2, DLG4, DNAJC5, SV2A, CDK16, SEC24C, MT3, GOLGA2, SCAMP5, STX4, STX1A, MADD, VANGL2, RPH3A, PTPRN, STX1B, SCAP, NDEL1, OTOF, IGF2R, PEBP1, NRGN, CAR4, RAB3A, LMAN2, AZIN2, AMPH, SLC32A1, NPTX1, SYN3, RAB11B, APBA2, TEX261, AP2M1, SYT11, DPYSL3, SLC6A17, FURIN, DBI, ATP13A2, KIF3C, VDAC1, SREBF2, TMEM163, YIPF3, SPTBN2, TP…	57	0.000425043	3.37157
CA3	Downregulated	GOTERM_CC_FAT	GO:0033267~axon part	KCNC1, SPG7, CASR, SNCB, SNCA, GRIK5, CAD, RANGAP1, SYT7, SYNGR1, ITSN1, ADORA1, KCNJ11, PACSIN1, ANK1, HTR1A, ROBO1, MAPT, DLG4, CNTNAP1, DNAJC5, SV2A, KCNQ2, BOC, NSF, STX6, DAB2IP, POLG, LIMK1, PTPRN, GRM4, SMO, NDEL1, PEBP1, DBN1, UNC13A, EPN1, RAB3A, CPLX1, FKBP4, AMPH, SLC32A1, DAGLA, AP3D1, AGRN, HCN3, TUBB4A, SGIP1, AP2M1, SYT11, SPTBN4, NFASC, RTN4R, TBC1D24, PNOC, MAPK8IP3, PTCH1, RNF40…	60	0.000423328	3.37332
CA3	Downregulated	GOTERM_CC_DIRECT	GO:0005743~mitochondrial inner membrane	CYB5R3, SLC27A1, CYC1, PINK1, STOML2, UQCRQ, CDS2, NDUFS7, ATAD3A, GHITM, SLC25A25, BOK, SLC25A23, DNAJC11, SLC25A22, SLC8B1, TMEM14C, HMGCL, COX15, SLC25A4, POLG, SLC25A5, MCU, CAPN10, SLC25A38, PLA2G6, SLC25A39, PMPCA, NDUFB3, COX7C, TIMM13, HADHA, SRC, SFXN5, MPV17L2, LETMD1, SLC25A42, BDH1, CHDH, ABCB8, NDUFA3, PHB, ABCB6, SOD2, VDAC1, SDHA, UCP2, NDUFV1, SLC25A10, PRODH1, RHOT2, SPNS1, SLC25…	54	0.000371944	3.42952
CA3	Downregulated	GOTERM_CC_FAT	GO:0031252~cell leading edge	KCNC1, WASF3, SRCIN1, TLN2, LMO4, BCAR1, CSPG4, WWC1, PIP5K1C, MTSS1L, ITSN1, AMOTL1, ADORA1, KCNJ11, KLHL2, CTNNB1, CTTN, PACSIN1, ANK1, ROBO1, UNC5A, STX4, ACTA1, ARHGEF7, INPPL1, BAIAP2, FLOT2, SLC9A3R1, MYADM, CDK5, DCTN1, NDEL1, DBN1, ABCA7, PALM, SSH1, APC2, CYTH3, CAPZB, CDC37, SRC, PXN, AMPH, ATN1, ARHGAP44, INPP5J, PLEKHG5, BRK1, INPP5E, KCNB1, SLC12A5, ARFIP2, EVL, DPYSL3, GAS7, CORO1C,…	65	0.000371624	3.4299
CA3	Downregulated	GOTERM_CC_FAT	GO:0044431~Golgi apparatus part	GNPTG, CDIPT, SLC9A7, VPS52, CSPG5, SLC35A2, TVP23A, SLC35A4, PACSIN1, NSG1, SCAMP5, NMNAT2, SCAMP3, CHAC1, BSN, TMEM132A, NTSR2, PITPNM1, MGAT3, CHID1, SCYL1, TRAPPC9, BACE1, CAR4, ERC1, MYO18A, ARFGAP1, GLG1, ABCA7, RAB7B, LMAN2, LLGL1, SLC11A2, GORASP1, SPPL3, RHBDF1, SPPL2B, ARFIP2, RFNG, FURIN, SREBF2, B3GAT2, B3GAT1, PLK3, ARF1, ST8SIA5, SPTBN2, MTOR, NDST1, CLSTN3, GJA1, RGP1, LGR5, MMP24,…	99	0.000220523	3.65655
CA3	Downregulated	GOTERM_CC_FAT	GO:0005773~vacuole	SLC22A17, SLC9A7, SEC31A, PLEKHM2, PLEKHM1, ADCY5, ATP6AP1, GNA11, CHMP7, ADCY6, SYT3, PTPN23, VPS52, SYT7, ZNRF1, SIDT2, SLC26A11, AMOTL2, STARD3, SLC2A8, TBC1D16, PACSIN1, TRAK1, NSG1, TMUB1, DNAJC5, RAPGEF1, MVB12B, SCAMP5, NMNAT2, MAGI2, PTPRF, ABCC10, PTPRN, RPTOR, RUBCN, DEPDC5, TMEM208, CHID1, RCC2, TRAPPC9, MIB2, BACE1, RAB15, SH3GL1, CHMP2A, ABCA7, RAB7B, STK11IP, RABEPK, NPRL3, SRC, ATP…	152	0.000102631	3.98872
CA3	Downregulated	GOTERM_CC_FAT	GO:0005794~Golgi apparatus	ADCY3, GNPTG, SLC9A7, CDIPT, QPCTL, SNCB, SNCA, VPS52, CSPG5, SLC35A2, SLC26A11, TVP23A, SLC35A4, PACSIN1, CUL7, NSG1, SCAMP5, NMNAT2, SCAMP3, STMN3, CHAC1, MDGA1, PICK1, TMEM132A, BSN, RPH3A, PTPRN, BICD2, NTSR2, RUBCN, PITPNM1, MGAT3, CHID1, TRAPPC9, SCYL1, BACE1, PDE4DIP, COL1A1, CAR4, ERC1, MYO18A, GLG1, ARFGAP1, ABCA7, RAB7B, MGAT5B, TMEM214, TRRAP, LMAN2, PAQR3, LLGL1, SLC11A2, FBXW8, GORAS…	177	6.54555e-05	4.18405
CA3	Downregulated	GOTERM_CC_DIRECT	GO:0030426~growth cone	ORAI2, CDK5R1, SNCB, SSH1, PREX1, SNCA, KATNB1, IGHMBP2, CTTN, CRMP1, INPP5J, RAC3, MAPT, DLG3, BOC, KIF21B, DSCAM, STMN3, PTPRF, ARHGEF7, RTN4R, CBARP, STIM1, DPYSL3, SIGMAR1, CDK5, SHANK2, KIF3C, DVL1, PPP1R9B, CSNK1E, TNK2, ADGRL1, DBN1, CALM2, GAP43, MAP3K12	37	2.67168e-06	5.57322
CA3	Downregulated	GOTERM_CC_FAT	GO:0098793~presynapse	SNCB, SNCA, SYT3, GRIK5, LRRC4B, CAD, SYT7, ITSN1, SYNGR1, ADORA1, SLC2A8, RABAC1, PACSIN1, SLC2A3, TRIM9, SNPH, DLG4, DNAJC5, SV2A, CDK16, NSF, SCAMP5, MT3, STX6, STX4, STX1A, NRXN2, POLG, MADD, PICK1, BSN, PCDH8, PTPRN, RPH3A, STX1B, GRM4, NDEL1, NCOA2, OTOF, C1QL1, RAB15, PEBP1, ERC1, UNC13A, EPN1, PPFIA3, RAB3A, PPFIA4, CPLX1, AMPH, RIMS3, SLC32A1, SYN3, RAB11B, APBA2, AP3D1, CAMK2A, SGIP1, A…	76	1.48015e-08	7.8297
CA3	Downregulated	GOTERM_CC_FAT	GO:0098794~postsynapse	SRCIN1, CLSTN3, GRIP1, SNCA, NCS1, GRIK5, GABBR2, ADORA1, CTTN, ANK1, GRIN2C, HOMER3, MAPT, GRIN2D, NSG1, DLG4, DLG3, TMUB1, CHRNA4, GNG3, NSF, MT3, STX4, BCR, MAGI2, CACNG8, BAIAP2, PICK1, MINK1, BSN, PCDH8, SIGMAR1, CDK5, SMO, NCK2, NCOA2, KLHL17, ARRB1, NRGN, DBN1, SEZ6, FAIM2, GAP43, ADD2, ADD1, ARFGAP1, PALM, CDK5R1, CTNND2, CX3CL1, CAPZB, ZMYND8, SRC, NR1D1, ARHGAP44, SYN3, BCL11A, LRFN1, C…	93	6.98508e-10	9.15583
CA3	Downregulated	GOTERM_CC_FAT	GO:0030054~cell junction	PLXNA3, SRCIN1, GRIP1, SNCA, GRIK5, NCS1, LRRC4B, GJA1, GABBR2, SYT7, ITSN1, SYNGR1, AMOTL1, FRRS1L, CTNNB1, RABAC1, ATP2B2, CTTN, PACSIN1, PRRT2, TRIM9, GRIN2C, HOMER3, GRIN2D, SNPH, PRRT1, DLG4, CHRNA4, TMUB1, CDK16, IMPDH1, SCAMP5, DSCAM, STX1A, MAGI1, CACNG8, RIMBP2, PICK1, MINK1, BSN, PCDH8, PTPRN, SIGMAR1, RPH3A, CDK5, KLHL17, OTOF, NRGN, SEZ6, FAIM2, UNC13A, GAP43, SH3GL1, KAZN, ABCA7, CLD…	214	8.05902e-11	10.0937
CA3	Downregulated	GOTERM_CC_FAT	GO:0045202~synapse	SRCIN1, SNCB, SNCA, SYT3, LRRC4B, GRIK5, SYT7, ITSN1, ADORA1, FRRS1L, CTNNB1, SLC2A8, ATP2B2, PACSIN1, ANK1, PRRT2, HOMER3, SLC2A3, GRIN2C, GRIN2D, PRRT1, NSG1, TMUB1, CHRNA4, DNAJC5, GNG3, DSCAM, SCAMP5, NMNAT2, MAGI2, BCR, PTPRF, MADD, POLG, BAIAP2, PICK1, BSN, RPH3A, PTPRN, IGSF8, NDEL1, ARRB1, RAB15, ERC1, DBN1, ADD2, UNC13A, ADD1, ARFGAP1, PALM, CDK5R1, CRTC1, CX3CL1, NRN1, CAPZB, ZMYND8, SR…	184	5.84969e-20	19.2329
CA3	Downregulated	GOTERM_CC_FAT	GO:0097458~neuron part	SNCB, CROCC, SNCA, SYT3, NELL2, RANGAP1, SYT7, ITSN1, ADORA1, CTNNB1, ATP2B2, HTR1A, GRIN2C, AQP11, HOMER3, CHRNA4, GNG3, EIF2B2, DAB2IP, OSBP2, MAGI2, BCR, PTPRF, POLG, RXRA, BSN, PTPRN, RPTOR, LHFPL5, SSTR3, BACE1, HTR6, ROR2, ABAT, RAB15, DBN1, UNC13A, ADD2, ADD1, ORAI2, PALM, CDK5R1, CLCN2, CRTC1, CAPZB, EPHB2, RIMS3, SLC32A1, PFN1, DAGLA, CRMP1, RAC3, AGRN, RAP1GAP2, TUBB4A, SGIP1, MAP2K1, T…	303	5.23495e-26	25.2811
CA3	Downregulated	GOTERM_MF_FAT	GO:1901981~phosphatidylinositol phosphate binding	OSBPL5, DAB2IP, INPPL1, SYT3, ARFIP2, SYT7, CYTH3, TECPR1, MTSS1L, WIPI2, RPH3A, ADAP1, AKT1, AMER3, PFN1, AMER2, RAB35, ZFYVE28, APBA2, NRGN, GAP43, WDR45, SNX11	23	0.0480561	1.31825
CA3	Downregulated	GOTERM_MF_FAT	GO:0031434~mitogen-activated protein kinase kinase binding	DAB2IP, KSR2, TAOK2, ARRB1, MAPK8IP3, KSR1, TRIB2, MAP3K11	8	0.0305024	1.51567
CA3	Downregulated	GOTERM_MF_FAT	GO:0015297~antiporter activity	SLC38A3, SLC7A2, SLC7A1, SLC25A10, SLC7A4, SLC7A5, SLC7A14, CLCN7	17	0.0272333	1.5649
CA3	Downregulated	GOTERM_MF_FAT	GO:0005516~calmodulin binding	ADCY3, SYT7, ATP2B2, PLCB3, CAMSAP1, CAMK2B, KCNQ2, CAMK2A, TRPM4, SLC8A2, NOS1, UBR4, MYH4, CAMSAP3, GRM4, KCNN1, MYH9L1, RYR1, PLA2G6, NRGN, CACNA1C, UNC13A, CACNA1A, GAP43, ADD2, SPTAN1, SLC9A1, ADD1	28	0.0247538	1.60636
CA3	Downregulated	GOTERM_MF_FAT	GO:0042802~identical protein binding	GNPTG, CADM3, PDGFB, HMGCR, ATG101, SNCA, NELL2, SYT3, TGFB3, GRIK5, DLK2, AMOTL1, UHRF1BP1, AMOTL2, ROBO1, SPR, BRI3, SLC8B1, HMGCL, MTUS2, DAB2IP, RXRB, OLFML2B, BAIAP2, SCUBE1, PICK1, ZHX3, STIM1, NTSR2, BRAP, VEGFB, ASCL1, HSPB6, JUN, COL1A2, ABAT, COL1A1, ADD2, UNC13A, SH3GL1, ADD1, FGFR1, DSCAML1, BCL2L2, NRN1, BANF1, SRF, EPHB2, GALE, SCARB1, TCF4, ENTPD2, SSSCA1, SPPL3, SMG9, DNMT3A, ABCB…	155	0.0247455	1.6065
CA3	Downregulated	GOTERM_MF_FAT	GO:0044389~ubiquitin-like protein ligase binding	UBE2Z, TOLLIP, ABTB2, PINK1, UBE2V1, RANGAP1, HSPA1A, STUB1, TRIB2, POLR2A, CKB, BAG4, USP19, BAG6, SQSTM1, BOK, CUL9, BTBD2, TUBB5, DLG3, TRAF3, UBXN1, SCAMP3, DDRGK1, EGR2, SLC25A5, SMAD7, DTX1, SMG5, TMBIM6, SYT11, TRIM28, SKI, AMBRA1, UBE2H, ZFP746, BTBD9, UBE2O, PIAS4, OTUB1, ARRB1, PRKAR1A, KCNH2, RNF40, CBS	45	0.0244484	1.61175
CA3	Downregulated	GOTERM_MF_FAT	GO:0044212~transcription regulatory region DNA binding	LMO4, ZFP335, CTNNB1, IGHMBP2, ATF6B, BAHCC1, SATB1, RXRB, RXRA, MED12, TBR1, RPTOR, ASCL1, MTF1, ARRB1, JUN, NFE2L1, ZFP516, ZFP513, SMARCA4, TNRC18, SOX2, SOX9, SRF, ZMYND8, LHX2, TCF4, ESRRA, SMAD7, PHB, CREBBP, KLF16, SMAD4, NR4A3, SMAD1, ZFP746, USF2, SREBF2, HDAC5, SALL2, FEZF2, HDAC4, NOTCH1, SMARCC2, ATF7, HIVEP3, RFX1, MTOR, NCOR2, POU6F1, TAF1C, RAI1, E2F4, FOSL2, FOXK1, FOXK2, HR, NF1X…	102	0.0240885	1.61819
CA3	Downregulated	GOTERM_MF_FAT	GO:0005543~phospholipid binding	HIP1R, PREX1, SYT3, SNCA, STOML2, MTSS1L, SYT7, AKT1, PACSIN1, NISCH, TUB, DAB2IP, SH3PXD2A, INPPL1, PSD2, RPH3A, ZCCHC14, ARHGAP33, ZFYVE28, NRGN, GAP43, WDR45, SNX11, SPTB, SNX17, CYTH3, ADAP1, AMPH, AMER3, PFN1, AMER2, ARHGAP44, APBA2, SCARB1, BDH1, SGIP1, WDFY3, OSBPL5, CPNE6, SYT11, SPTBN4, NSFL1C, ARFIP2, PHF12, TECPR1, WIPI2, GAS6, TULP4, NUP62, RAB35, SPTBN2	51	0.0230628	1.63709
CA3	Downregulated	GOTERM_MF_FAT	GO:0044822~poly(A) RNA binding	CHERP, SCAF4, U2AF2, TRMT2A, RBM15B, SRP68, SART3, IMP3, AKAP17A, SRRM4, DHX38, RAVER2, RAVER1, SUPT5H, CCAR2, GTPBP1, RBFOX2, YARS, RRP1, EMG1, RBFOX3, EEF2, MARK2, TNS1, RCC2, UBFD1, JUN, CELF4, CELF2, CELF1, MYO18A, SUPT6H, ADD1, ZC3H4, BOP1, PRRC2B, SERPINH1, DAZAP1, JRK, HNRNPM, PFN1, PPAN, PRR3, DDX49, KRI1, NOVA2, MEPCE, RPS24, ZFP346, TBL2, MCAT, NTPCR, FDPS, SRSF4, R3HDM2, ZFP579, ARF1, …	146	0.0157995	1.80136
CA3	Downregulated	GOTERM_MF_FAT	GO:0004842~ubiquitin-protein transferase activity	MAEA, BTRC, MED24, RNF187, RNF216, ZNRF1, RNF182, KLHL2, KLHL29, TRIM3, MGRN1, TRIM9, KLHL22, PELI3, FBXL15, CYHR1, RNF145, UBR4, MED12, UBE2H, BRAP, RNF180, PJA1, UBE2O, KLHL18, KLHL17, MIB2, TRIM32, ZER1, FBXL2, UBE2Z, UBE2V1, KEAP1, UBE2QL1, STUB1, PRPF19, RNF126, FBXW8, RNF165, KBTBD6, HECTD3, HECTD4, TRAF7, FBXW11, UNKL, TRAF3, FBXO2, TRIM28, MARCH4, KCTD10, RNF44, KLHL36, RNF4, AREL1, SMURF…	58	0.0157817	1.80185
CA3	Downregulated	GOTERM_MF_FAT	GO:0004842~ubiquitin-protein transferase activity	MAEA, BTRC, MED24, RNF187, RNF216, ZNRF1, RNF182, KLHL2, KLHL29, TRIM3, MGRN1, TRIM9, KLHL22, PELI3, FBXL15, CYHR1, RNF145, UBR4, MED12, UBE2H, BRAP, RNF180, PJA1, UBE2O, KLHL18, KLHL17, MIB2, TRIM32, ZER1, FBXL2, UBE2Z, UBE2V1, KEAP1, UBE2QL1, STUB1, PRPF19, RNF126, FBXW8, RNF165, KBTBD6, HECTD3, HECTD4, TRAF7, FBXW11, UNKL, TRAF3, FBXO2, TRIM28, MARCH4, KCTD10, RNF44, KLHL36, RNF4, AREL1, SMURF…	58	0.0157817	1.80185
CA3	Downregulated	GOTERM_MF_FAT	GO:0035254~glutamate receptor binding	FLOT2, PICK1, SHANK1, SHANK2, SHANK3, CTNNB1, ATP2B2, PLCG1, HOMER3, DLG4, DLG3, CAMK2A, CALM2, NSF	14	0.0142012	1.84768
CA3	Downregulated	GOTERM_MF_FAT	GO:0003712~transcription cofactor activity	PPARD, HR, WWC1, MED24, CBFA2T3, CTNNB1, MAGED1, PRMT2, AES, SMARCD3, MKL1, RBFOX2, RXRB, SOX11, TADA2B, MED12, ZHX3, PKN1, TLE2, SPEN, PPARGC1B, JUP, NCOA2, PIAS4, MED15, JUN, MED9, HIPK2, MAP3K10, PYGO2, USP22, CARM1, SMARCA4, ZFP212, HCFC1, GON4L, TRRAP, ZMYND8, CALCOCO1, ATN1, BCL11A, POU3F2, TCF4, MAML1, MAML2, CREBBP, TRIM28, SKI, PHF12, MED13L, ATXN7L3, HDAC5, HDAC4, SAP130, DYRK1B, PPRC1,…	60	0.014201	1.84768
CA3	Downregulated	GOTERM_MF_FAT	GO:0017124~SH3 domain binding	DAB2IP, INPPL1, HIP1R, BCAR1, GRIK5, GJA1, EFS, DPYSL3, EVL, SHANK1, SHANK2, SHANK3, INPP5J, MAPT, CNTNAP1, ADAM19, SYNGAP1, AFAP1, ADAM15, SGIP1, ADAM9	21	0.0140477	1.8524
CA3	Downregulated	GOTERM_MF_FAT	GO:0005245~voltage-gated calcium channel activity	CACNG8, CACNA1I, CACNA1G, NCS1, RYR1, CACNB1, CACNA1H, CACNG4, CACNA1E, CACNA1C, GAS6, CACNA1A, CACNA1B	13	0.0122563	1.91164
CA3	Downregulated	GOTERM_MF_FAT	GO:0005245~voltage-gated calcium channel activity	CACNG8, CACNA1I, CACNA1G, NCS1, RYR1, CACNB1, CACNA1H, CACNG4, CACNA1E, CACNA1C, GAS6, CACNA1A, CACNA1B	13	0.0122563	1.91164
CA3	Downregulated	GOTERM_MF_FAT	GO:0016417~S-acyltransferase activity	ZDHHC24, ZDHHC1, ZDHHC4, GOLGA7B, ZDHHC8, ZDHHC7, ZDHHC12, MCAT, FASN, ZDHHC18, YKT6	11	0.0106851	1.97122
CA3	Downregulated	GOTERM_MF_FAT	GO:0000149~SNARE binding	CPLX1, SYT3, ADCY6, VPS52, TXLNA, SYT7, LLGL1, TRIM9, SNPH, HECTD3, SEC22C, NSF, GOLGA2, STX6, STX1A, STX4, KCNB1, SYT11, RPH3A, TMED9, STX1B, CAPN10, YKT6, CACNA1A, UNC13A, RNF40, SPTAN1	27	0.00436246	2.36027
CA3	Downregulated	GOTERM_MF_FAT	GO:0000149~SNARE binding	CPLX1, SYT3, ADCY6, VPS52, TXLNA, SYT7, LLGL1, TRIM9, SNPH, HECTD3, SEC22C, NSF, GOLGA2, STX6, STX1A, STX4, KCNB1, SYT11, RPH3A, TMED9, STX1B, CAPN10, YKT6, CACNA1A, UNC13A, RNF40, SPTAN1	27	0.00436246	2.36027
CA3	Downregulated	GOTERM_MF_FAT	GO:0001076~transcription factor activity, RNA polymerase II transcription factor binding	MED24, SRF, ATN1, LHX2, POU3F2, CYS1, TCF4, MKL1, NACC2, SOX11, TRIM28, CREBBP, SMAD4, MED12, SPEN, PHF12, MED13L, PPARGC1B, NOTCH1, MED15, MED9, HIPK2, PPRC1, PYGO2, NFE2L1, CARM1, RERE, SMARCA4	28	0.00339706	2.4689
CA3	Downregulated	GOTERM_MF_FAT	GO:0051020~GTPase binding	ATP6AP1, RUSC2, HPS4, VPS52, STOML2, RANGAP1, RGP1, MTSS1L, TBC1D16, RUNDC1, TBC1D13, NSF, STX4, MICAL3, PICK1, PKN1, IPO9, RPH3A, PTPRN, BICD2, DAPK3, RAB11FIP4, RCC2, GNB2, SGSM3, GNB1, IPO4, ERC1, SH3GL1, MAP3K11, RAB3A, LLGL1, PFN1, BICDL1, BRK1, TNPO2, EHD1, DVL3, MAP2K1, TBC1D10B, TBC1D10A, MICALL1, DVL1, CORO1C, PREB, SH3BP4, ULK1, EVI5L, KCTD13, GGA3, CDC42BPB	51	0.00255614	2.59242
CA3	Downregulated	GOTERM_MF_FAT	GO:0015291~secondary active transmembrane transporter activity	SLC9A7, SLC38A3, SLC45A4, SLC45A1, SLC19A1, SLC7A4, SLC7A5, SLC26A11, SLC35A2, SLC35A4, SLC11A2, SLC1A4, SLC2A8, SLC32A1, SLC2A6, SLC24A3, SLC23A2, SLC4A8, SLCO3A1, SLC8B1, SLC4A3, SLC8A2, SLC12A9, SLC6A11, SLC12A4, SLC12A5, MCU, SLC6A17, SLC7A14, ANKH, SLC6A7, SLC7A2, SLC7A1, SLC25A10, SLC6A6, SLC41A1, SLC13A3, SLC38A1, SLC15A4, CLCN7, SLC9A1	41	0.00228276	2.64154
CA3	Downregulated	GOTERM_MF_FAT	GO:0000988~transcription factor activity, protein binding	PPARD, HR, WWC1, MED24, CBFA2T3, CTNNB1, MAGED1, PRMT2, AES, HEY1, SMARCD3, MKL1, CYS1, RBFOX2, RXRB, SOX11, TADA2B, MED12, ZHX3, PKN1, TLE2, SPEN, PPARGC1B, JUP, ASCL1, NCOA2, MED15, PIAS4, NAB2, JUN, MED9, HIPK2, MAP3K10, PYGO2, NFE2L1, USP22, CARM1, SUPT6H, SMARCA4, ZFP212, HCFC1, GON4L, TRRAP, ZMYND8, SRF, CALCOCO1, ATN1, LHX2, BCL11A, MLXIP, POU3F2, TCF4, NACC2, MAML1, MAML2, CREBBP, TRIM28,…	72	0.00122607	2.91149
CA3	Downregulated	GOTERM_MF_FAT	GO:0008270~zinc ion binding	QPCTL, LMO4, SNCA, ZNRF1, IGHMBP2, TRIM46, FNTB, BRPF3, CUL9, ZFP276, CYHR1, RNF145, RXRB, CIZ1, RXRA, TADA2B, UBR4, TRIM41, RPH3A, BRAP, PIAS4, MIB2, TRIM32, PYGO2, RNF26, CAR4, ADAMTS2, ADAMTS4, SIVA1, AMZ1, ZFAND3, ZMYND8, PXN, SLC11A2, RNF165, LHX2, TRAF7, THAP11, UNKL, TRAF3, ZFP346, ESRRA, BMP1, EHMT1, CREBBP, SKI, NR4A3, MARCH10, CSRP2, SHANK3, CAPN15, HDAC4, MAN2C1, TET3, RNF4, LASP1, RNF…	138	0.000836254	3.07766
CA3	Downregulated	GOTERM_MF_FAT	GO:0030554~adenyl nucleotide binding	ADCY3, KIFC2, ADCY5, CLPB, ATP6AP1, ADCY6, ACSS2, TTL, DMPK, IGHMBP2, ATP2B2, CSNK2A1, DHX38, MAP3K9, WNK4, EIF2B2, NMNAT2, YARS, SCAMP3, MAGI1, CSNK1G2, ABCC10, MYH4, NAV3, WNK2, MARK2, SCYL1, TESK1, ROR2, MAPK7, KIF26A, MYO18A, EP400, SMARCA4, FGFR1, ABCA7, COASY, STK11, PTK7, HSPA1A, EPHA10, EPHB3, ABCA3, SRC, EPHB2, PFN1, EPHB6, DDX49, TTBK1, LMTK2, HCN3, ENTPD2, DCAKD, ABCB9, ABCB8, MAP2K1, …	191	2.40638e-05	4.61864
CA3	Downregulated	GOTERM_MF_FAT	GO:0000166~nucleotide binding	ADCY3, KIFC2, ADCY1, SCAF4, TUBB2B, TUBB2A, TRMT2A, U2AF2, ADCY5, ADCY6, SART3, ATP2B2, DIRAS1, DHX38, RAVER2, RAVER1, MAP3K9, WNK4, EIF2B2, GTPBP2, GTPBP1, YARS, MAGI1, ABCC10, MYH4, WNK2, NAV3, BRAP, PPARGC1B, MARK2, SCYL1, ROR2, RAB15, MAPK7, KIF26A, MYO18A, COASY, RAB40C, HSPA1A, EPHB3, HADHA, EPHB2, URGCP, PFN1, EPHB6, RAC3, TUBB4A, DCAKD, RPS24, MAP2K1, TAOK2, TREX1, TRIO, AARSD1, KIF3C, AT…	294	2.23313e-07	6.65109
CA3	Downregulated	GOTERM_MF_FAT	GO:0019899~enzyme binding	U2AF2, ADCY5, SNCA, RUSC2, ADCY6, NELL2, VPS52, PTPN23, STOML2, RANGAP1, XRCC1, SART3, UHRF1BP1, CTNNB1, DIRAS1, RUNDC1, CUL9, BTBD2, SUPT5H, CCAR2, ADAM9, PPP1R37, DAB2IP, DDRGK1, MAGI2, BCR, PTPRF, POLG, RXRA, PTPRN, RPTOR, BTBD9, JUP, RCC2, MTF1, PIAS4, JUN, MLEC, PEX26, RGCC, BACE1, RYR1, ABAT, ZNHIT1, PDE4DIP, MAPK7, ADAMTS4, FBXL2, SH3GL1, CDK5R1, STK11IP, ELL, CACNB1, HSPA1A, PXN, CDC37, P…	296	5.62578e-18	17.2498
CA3	Downregulated	KEGG_PATHWAY	rno04340:Hedgehog signaling pathway	SMO, CSNK1D, CSNK1E, CSNK1G2, BTRC, PTCH1, FBXW11, GLI3	8	0.0428388	1.36816
CA3	Downregulated	KEGG_PATHWAY	rno04921:Oxytocin signaling pathway	ADCY3, ACTB, ADCY1, GNAO1, MAP2K1, CACNG8, ADCY5, PPP1R12B, PRKAG1, ADCY6, CACNB1, CACNG4, EEF2, KCNJ12, SRC, KCNJ14, FOS, PLCB3, KCNJ9, JUN, RYR1, CAMK2B, MAPK7, CACNA1C, CAMK2A, CALM2	26	0.0273632	1.56283
CA3	Downregulated	KEGG_PATHWAY	rno04911:Insulin secretion	TRPM4, ADCY3, RAB3A, STX1A, ADCY1, GNA11, ADCY5, ADCY6, ATP1A3, ATP1A1, ATP1A2, KCNJ11, PLCB3, KCNN1, ATF6B, CAMK2B, CACNA1C, CAMK2A	18	0.0260869	1.58358
CA3	Downregulated	KEGG_PATHWAY	rno04925:Aldosterone synthesis and secretion	ADCY3, ADCY1, LDLR, GNA11, ADCY5, ADCY6, CACNA1I, PLCB3, DAGLA, ATF6B, CACNA1G, CACNA1H, CAMK2B, SCARB1, CACNA1C, CAMK2A, CALM2, LIPE	18	0.022199	1.65367
CA3	Downregulated	KEGG_PATHWAY	rno04724:Glutamatergic synapse	ADCY3, SLC38A3, DLGAP1, ADCY1, GNAO1, ADCY5, ADCY6, GRIK5, SHANK1, SHANK2, SHANK3, GRM4, PLCB3, GNB2, GNB1, HOMER3, GRIN2C, GRIN2D, DLG4, GNB5, SLC38A1, GNG3, CACNA1C, CACNA1A	24	0.00864715	2.06313
CA3	Downregulated	KEGG_PATHWAY	rno04727:GABAergic synapse	ADCY3, SLC38A5, SLC38A3, ADCY1, GNAO1, ADCY5, ADCY6, GABBR2, SRC, SLC32A1, GNB2, GNB1, ABAT, GNB5, SLC38A1, GNG3, CACNA1C, CACNA1A, NSF, CACNA1B	20	0.00769094	2.11402
CA3	Downregulated	KEGG_PATHWAY	rno04713:Circadian entrainment	ADCY3, ADCY1, NOS1, GNAO1, ADCY5, ADCY6, CACNA1I, FOS, PLCB3, GNB2, KCNJ9, GNB1, GRIN2C, GRIN2D, CACNA1G, RYR1, CACNA1H, GNB5, CAMK2B, GNG3, CACNA1C, CAMK2A, CALM2	23	0.00484391	2.3148
CA3	Downregulated	KEGG_PATHWAY	rno04725:Cholinergic synapse	ADCY3, ADCY1, GNA11, ADCY5, ADCY6, KCNJ12, KCNJ14, AKT1, FOS, PLCB3, CHRNA4, CAMK2B, GNG3, KCNQ2, CAMK2A, GNAO1, MAP2K1, GNB2, FYN, GNB1, GNB5, CHRNB2, CACNA1C, CACNA1A, CACNA1B	25	0.00281747	2.55014
